# Supplementary material for: Footprints of Directional Selection in Wild Atlantic Salmon Populations: Evidence for Parasite-Driven Evolution?
Source: PLoS One. 2014 Mar 26;9(3):e91672. doi: 10.1371/journal.pone.0091672 (PMC3966780; doi:10.1371/journal.pone.0091672)
Supplement: File S1 — SNP allele frequencies per population. (XLSX) [file pone.0091672.s003.xlsx]

## Sheet: LL_Sys
File S1. SNP allele frequencies per population. LL_SYS
SNP_ID	Allele	Count	Frequency	Variance	SD
GCR_cBin24032_Ctg1_76	T	64	1	0	0
GCR_cBin13749_Ctg1_18	C	64	1	0	0
ESTNV_28684_665	A	64	1	0	0
GCR_cBin32777_Ctg1_66	G	64	1	0	0
GCR_cBin13749_Ctg1_171	A	64	1	0	0
GCR_cBin22083_Ctg1_38	A	14	0.21875	0.00289917	0.0538439
GCR_cBin22083_Ctg1_38	C	50	0.78125	0.00289917	0.0538439
GCR_cBin7800_Ctg1_739	A	51	0.796875	0.00237274	0.0487108
GCR_cBin7800_Ctg1_739	T	13	0.203125	0.00237274	0.0487108
ESTV_16768_432	A	39	0.609375	0.00426483	0.0653057
ESTV_16768_432	T	25	0.390625	0.00426483	0.0653057
GCR_cBin42907_Ctg1_150	C	64	1	0	0
GCR_rBin14981_Ctg1_193	A	56	0.875	0.00146484	0.0382733
GCR_rBin14981_Ctg1_193	C	8	0.125	0.00146484	0.0382733
ESTNV_26586_283	A	43	0.671875	0.00273895	0.052335
ESTNV_26586_283	T	21	0.328125	0.00273895	0.052335
ESTNV_34251_1165	G	64	1	0	0
ESTNV_34453_617	A	64	1	0	0
GCR_cBin5720_Ctg1_153	C	5	0.078125	0.00151825	0.0389647
GCR_cBin5720_Ctg1_153	G	59	0.921875	0.00151825	0.0389647
ESTV_13344_491	A	5	0.078125	0.00151825	0.0389647
ESTV_13344_491	C	59	0.921875	0.00151825	0.0389647
ESTNV_32810_1998	A	59	0.921875	0.00151825	0.0389647
ESTNV_32810_1998	C	5	0.078125	0.00151825	0.0389647
ESTV_12810_403	G	64	1	0	0
ESTV_12810_361	G	64	1	0	0
ESTNV_30347_550	T	64	1	0	0
ESTNV_27471_81	A	31	0.484375	0.00463104	0.0680518
ESTNV_27471_81	G	33	0.515625	0.00463104	0.0680518
GCR_cBin23673_Ctg1_272	A	9	0.140625	0.00255585	0.0505554
GCR_cBin23673_Ctg1_272	G	55	0.859375	0.00255585	0.0505554
GCR_cBin49919_Ctg1_51	A	46	0.71875	0.00387573	0.0622554
GCR_cBin49919_Ctg1_51	C	18	0.28125	0.00387573	0.0622554
GCR_cBin3018_Ctg1_120	A	59	0.951613	0.000704911	0.0265502
GCR_cBin3018_Ctg1_120	G	3	0.0483871	0.000704911	0.0265502
GCR_cBin3018_Ctg1_570	A	59	0.921875	0.00151825	0.0389647
GCR_cBin3018_Ctg1_570	C	5	0.078125	0.00151825	0.0389647
GCR_cBin3018_Ctg1_511	A	5	0.078125	0.00151825	0.0389647
GCR_cBin3018_Ctg1_511	G	59	0.921875	0.00151825	0.0389647
GCR_cBin8091_Ctg1_197	A	38	0.59375	0.00314331	0.0560652
GCR_cBin8091_Ctg1_197	T	26	0.40625	0.00314331	0.0560652
GCR_cBin8091_Ctg1_368	A	64	1	0	0
GCR_cBin38678_Ctg1_119	A	19	0.296875	0.0033493	0.0578732
GCR_cBin38678_Ctg1_119	G	45	0.703125	0.0033493	0.0578732
GCR_cBin26178_Ctg1_157	A	59	0.921875	0.00151825	0.0389647
GCR_cBin26178_Ctg1_157	T	5	0.078125	0.00151825	0.0389647
ESTNV_35287_375	A	43	0.671875	0.00371552	0.060955
ESTNV_35287_375	G	21	0.328125	0.00371552	0.060955
ESTNV_32999_885	A	38	0.59375	0.00265503	0.051527
ESTNV_32999_885	G	26	0.40625	0.00265503	0.051527
ESTV_13371_209	A	9	0.140625	0.00157928	0.0397402
ESTV_13371_209	C	55	0.859375	0.00157928	0.0397402
ESTNV_20700_631	A	12	0.1875	0.00183105	0.0427908
ESTNV_20700_631	G	52	0.8125	0.00183105	0.0427908
ESTNV_34751_1764	A	12	0.1875	0.00183105	0.0427908
ESTNV_34751_1764	C	52	0.8125	0.00183105	0.0427908
ESTNV_34751_1633	A	12	0.1875	0.00183105	0.0427908
ESTNV_34751_1633	G	52	0.8125	0.00183105	0.0427908
GCR_cBin4736_Ctg1_83	A	64	1	0	0
ESTNV_35283_192	A	64	1	0	0
GCR_cBin30159_Ctg1_115	A	64	1	0	0
GCR_cBin20874_Ctg1_187	A	64	1	0	0
GCR_cBin7930_Ctg1_81	A	64	1	0	0
GCR_cBin12902_Ctg1_491	A	25	0.390625	0.00475311	0.0689428
GCR_cBin12902_Ctg1_491	G	39	0.609375	0.00475311	0.0689428
ESTNV_32983_812	A	7	0.109375	0.00133514	0.0365396
ESTNV_32983_812	G	57	0.890625	0.00133514	0.0365396
ESTV_11898_329	G	64	1	0	0
ESTV_11898_340	A	36	0.5625	0.00378418	0.0615157
ESTV_11898_340	C	28	0.4375	0.00378418	0.0615157
ESTNV_26718_947	A	58	0.90625	0.00119019	0.0344991
ESTNV_26718_947	G	6	0.09375	0.00119019	0.0344991
ESTV_16673_1575	A	40	0.625	0.00439453	0.0662913
ESTV_16673_1575	G	24	0.375	0.00439453	0.0662913
GCR_cBin47076_Ctg1_116	A	7	0.109375	0.00133514	0.0365396
GCR_cBin47076_Ctg1_116	G	57	0.890625	0.00133514	0.0365396
GCR_cBin38737_Ctg1_101	A	7	0.109375	0.00133514	0.0365396
GCR_cBin38737_Ctg1_101	G	57	0.890625	0.00133514	0.0365396
GCR_cBin29198_Ctg1_37	A	57	0.890625	0.00133514	0.0365396
GCR_cBin29198_Ctg1_37	C	7	0.109375	0.00133514	0.0365396
GCR_cBin31010_Ctg1_231	A	7	0.109375	0.00133514	0.0365396
GCR_cBin31010_Ctg1_231	C	57	0.890625	0.00133514	0.0365396
GCR_cBin42440_Ctg1_139	A	64	1	0	0
ESTNV_32327_914	A	45	0.703125	0.00383759	0.0619482
ESTNV_32327_914	G	19	0.296875	0.00383759	0.0619482
GCR_hBin38301_Ctg1_117	A	3	0.046875	0.000663757	0.0257635
GCR_hBin38301_Ctg1_117	T	61	0.953125	0.000663757	0.0257635
ESTV_16226_67	A	64	1	0	0
GCR_cBin8657_Ctg1_79	A	51	0.796875	0.00237274	0.0487108
GCR_cBin8657_Ctg1_79	C	13	0.203125	0.00237274	0.0487108
ESTV_20115_337	A	8	0.125	0.00146484	0.0382733
ESTV_20115_337	G	56	0.875	0.00146484	0.0382733
GCR_cBin15162_Ctg1_205	A	57	0.890625	0.00133514	0.0365396
GCR_cBin15162_Ctg1_205	C	7	0.109375	0.00133514	0.0365396
GCR_cBin21922_Ctg1_271	A	64	1	0	0
GCR_cBin21922_Ctg1_272	C	64	1	0	0
ESTNV_28147_868	A	11	0.171875	0.00273895	0.052335
ESTNV_28147_868	T	53	0.828125	0.00273895	0.052335
GCR_cBin17189_Ctg1_418	A	58	0.90625	0.00119019	0.0344991
GCR_cBin17189_Ctg1_418	G	6	0.09375	0.00119019	0.0344991
GCR_cBin34_Ctg1_596	A	64	1	0	0
GCR_cBin2124_Ctg1_298	A	56	0.875	0.00146484	0.0382733
GCR_cBin2124_Ctg1_298	G	8	0.125	0.00146484	0.0382733
ESTNV_36830_1365	A	5	0.078125	0.00102997	0.0320931
ESTNV_36830_1365	G	59	0.921875	0.00102997	0.0320931
ESTV_16585_88	A	64	1	0	0
GCR_cBin33029_Ctg1_110	A	6	0.09375	0.00119019	0.0344991
GCR_cBin33029_Ctg1_110	G	58	0.90625	0.00119019	0.0344991
ESTNV_35593_589	A	60	0.9375	0.000854492	0.0292317
ESTNV_35593_589	G	4	0.0625	0.000854492	0.0292317
GCR_cBin29162_Ctg1_328	A	24	0.375	0.00341797	0.0584634
GCR_cBin29162_Ctg1_328	G	40	0.625	0.00341797	0.0584634
GCR_cBin29853_Ctg1_324	A	6	0.09375	0.00119019	0.0344991
GCR_cBin29853_Ctg1_324	T	58	0.90625	0.00119019	0.0344991
GCR_cBin4502_Ctg2_241	C	6	0.09375	0.00119019	0.0344991
GCR_cBin4502_Ctg2_241	G	58	0.90625	0.00119019	0.0344991
ESTNV_35593_1402	A	11	0.171875	0.00176239	0.0419808
ESTNV_35593_1402	G	53	0.828125	0.00176239	0.0419808
GCR_cBin7483_Ctg1_160	A	31	0.484375	0.00414276	0.0643643
GCR_cBin7483_Ctg1_160	G	33	0.515625	0.00414276	0.0643643
GCR_hBin16230_Ctg1_42	A	30	0.46875	0.00387573	0.0622554
GCR_hBin16230_Ctg1_42	G	34	0.53125	0.00387573	0.0622554
ESTNV_35108_1142	A	64	1	0	0
ESTNV_32740_1792	A	19	0.296875	0.00237274	0.0487108
ESTNV_32740_1792	T	45	0.703125	0.00237274	0.0487108
ESTNV_18010_624	A	64	1	0	0
ESTNV_33627_835	A	55	0.859375	0.00157928	0.0397402
ESTNV_33627_835	G	9	0.140625	0.00157928	0.0397402
ESTNV_33761_306	A	64	1	0	0
ESTNV_35278_946	C	64	1	0	0
ESTNV_32069_319	A	64	1	0	0
GCR_cBin31757_Ctg1_238	A	50	0.78125	0.00192261	0.0438475
GCR_cBin31757_Ctg1_238	C	14	0.21875	0.00192261	0.0438475
ESTNV_34322_888	A	64	1	0	0
ESTNV_13218_450	A	57	0.890625	0.00133514	0.0365396
ESTNV_13218_450	G	7	0.109375	0.00133514	0.0365396
ESTV_19854_114	A	21	0.328125	0.0042038	0.0648367
ESTV_19854_114	C	43	0.671875	0.0042038	0.0648367
GCR_cBin40971_Ctg1_99	A	49	0.765625	0.00243378	0.0493333
GCR_cBin40971_Ctg1_99	C	15	0.234375	0.00243378	0.0493333
ESTNV_35964_989	C	64	1	0	0
GCR_cBin18615_Ctg1_159	A	41	0.640625	0.00304413	0.0551736
GCR_cBin18615_Ctg1_159	C	23	0.359375	0.00304413	0.0551736
ESTNV_33535_713	A	45	0.703125	0.0033493	0.0578732
ESTNV_33535_713	C	19	0.296875	0.0033493	0.0578732
GCR_cBin48650_Ctg1_186	A	31	0.484375	0.00365448	0.0604523
GCR_cBin48650_Ctg1_186	G	33	0.515625	0.00365448	0.0604523
ESTNV_36924_232	A	37	0.578125	0.00298309	0.0546177
ESTNV_36924_232	C	27	0.421875	0.00298309	0.0546177
ESTNV_36384_1752	A	53	0.828125	0.00176239	0.0419808
ESTNV_36384_1752	G	11	0.171875	0.00176239	0.0419808
ESTNV_35253_493	A	30	0.46875	0.00387573	0.0622554
ESTNV_35253_493	G	34	0.53125	0.00387573	0.0622554
ESTNV_33535_853	A	45	0.703125	0.0033493	0.0578732
ESTNV_33535_853	G	19	0.296875	0.0033493	0.0578732
GCR_cBin45827_Ctg1_60	C	64	1	0	0
ESTV_15080_392	A	29	0.467742	0.00308818	0.0555714
ESTV_15080_392	G	33	0.532258	0.00308818	0.0555714
GCR_cBin44622_Ctg1_29	A	34	0.53125	0.00289917	0.0538439
GCR_cBin44622_Ctg1_29	G	30	0.46875	0.00289917	0.0538439
GCR_cBin46385_Ctg1_67	A	1	0.015625	0.000236511	0.0153789
GCR_cBin46385_Ctg1_67	G	63	0.984375	0.000236511	0.0153789
GCR_cBin572_Ctg1_59	A	62	1	0	0
ESTNV_28108_776	A	17	0.265625	0.00243378	0.0493333
ESTNV_28108_776	C	47	0.734375	0.00243378	0.0493333
ESTNV_35762_168	A	60	0.9375	0.000854492	0.0292317
ESTNV_35762_168	C	4	0.0625	0.000854492	0.0292317
GCR_cBin46046_Ctg1_198	A	43	0.671875	0.00225067	0.0474412
GCR_cBin46046_Ctg1_198	C	21	0.328125	0.00225067	0.0474412
GCR_cBin33614_Ctg1_90	G	64	1	0	0
GCR_cBin17465_Ctg1_129	G	64	1	0	0
ESTNV_30075_59	A	64	1	0	0
ESTV_21602_820	A	64	1	0	0
GCR_cBin43822_Ctg1_97	A	64	1	0	0
ESTNV_32753_1727	G	64	1	0	0
GCR_cBin45576_Ctg1_50	A	57	0.890625	0.00182343	0.0427016
GCR_cBin45576_Ctg1_50	G	7	0.109375	0.00182343	0.0427016
GCR_cBin1952_Ctg1_280	G	64	1	0	0
GCR_cBin38681_Ctg1_218	C	64	1	0	0
GCR_cBin6340_Ctg1_59	A	58	0.90625	0.00119019	0.0344991
GCR_cBin6340_Ctg1_59	C	6	0.09375	0.00119019	0.0344991
GCR_cBin11187_Ctg1_62	G	64	1	0	0
GCR_cBin7014_Ctg1_132	A	62	0.96875	0.000457764	0.0213954
GCR_cBin7014_Ctg1_132	G	2	0.03125	0.000457764	0.0213954
GCR_rBin10118_Ctg1_34	A	5	0.078125	0.00151825	0.0389647
GCR_rBin10118_Ctg1_34	G	59	0.921875	0.00151825	0.0389647
ESTNV_34021_1870	G	64	1	0	0
ESTNV_32103_191	C	64	1	0	0
GCR_cBin42179_Ctg1_389	C	64	1	0	0
GCR_cBin43281_Ctg1_51	G	64	1	0	0
GCR_cBin52844_Ctg1_180	A	17	0.265625	0.00243378	0.0493333
GCR_cBin52844_Ctg1_180	G	47	0.734375	0.00243378	0.0493333
GCR_cBin42179_Ctg1_350	G	64	1	0	0
GCR_cBin37910_Ctg1_93	A	29	0.453125	0.0021286	0.0461368
GCR_cBin37910_Ctg1_93	G	35	0.546875	0.0021286	0.0461368
GCR_cBin30294_Ctg1_36	G	64	1	0	0
ESTNV_28987_832	A	59	0.921875	0.00151825	0.0389647
ESTNV_28987_832	C	5	0.078125	0.00151825	0.0389647
GCR_cBin38428_Ctg1_72	A	64	1	0	0
GCR_cBin30905_Ctg1_38	C	64	1	0	0
ESTNV_30484_927	A	64	1	0	0
GCR_cBin28586_Ctg1_147	A	64	1	0	0
ESTNV_33760_518	C	64	1	0	0
GCR_cBin17730_Ctg1_232	A	64	1	0	0
GCR_cBin23510_Ctg1_150	A	64	1	0	0
GCR_cBin43132_Ctg1_139	A	64	1	0	0
ESTNV_33875_378	C	22	0.34375	0.00314331	0.0560652
ESTNV_33875_378	G	42	0.65625	0.00314331	0.0560652
ESTNV_35486_240	G	64	1	0	0
ESTNV_35163_1993	T	64	1	0	0
ESTNV_35486_738	A	22	0.34375	0.00265503	0.051527
ESTNV_35486_738	C	42	0.65625	0.00265503	0.051527
GCR_cBin12492_Ctg1_178	A	22	0.34375	0.00265503	0.051527
GCR_cBin12492_Ctg1_178	G	42	0.65625	0.00265503	0.051527
ESTNV_35486_385	C	42	0.65625	0.00265503	0.051527
ESTNV_35486_385	G	22	0.34375	0.00265503	0.051527
GCR_hBin7576_Ctg1_138	A	42	0.65625	0.00265503	0.051527
GCR_hBin7576_Ctg1_138	G	22	0.34375	0.00265503	0.051527
GCR_cBin12492_Ctg1_183	A	22	0.34375	0.00265503	0.051527
GCR_cBin12492_Ctg1_183	G	42	0.65625	0.00265503	0.051527
ESTNV_26437_1349	A	64	1	0	0
GCR_cBin10658_Ctg1_107	C	5	0.078125	0.00102997	0.0320931
GCR_cBin10658_Ctg1_107	G	59	0.921875	0.00102997	0.0320931
GCR_cBin33592_Ctg1_241	A	64	1	0	0
ESTNV_33888_314	G	64	1	0	0
GCR_cBin10390_Ctg1_228	A	64	1	0	0
ESTV_12221_170	A	5	0.078125	0.00102997	0.0320931
ESTV_12221_170	G	59	0.921875	0.00102997	0.0320931
GCR_cBin26140_Ctg1_118	G	64	1	0	0
GCR_cBin1019_Ctg1_221	A	64	1	0	0
GCR_cBin26140_Ctg1_33	A	64	1	0	0
ESTNV_27182_609	G	64	1	0	0
GCR_cBin27812_Ctg1_148	A	39	0.629032	0.00206438	0.0454355
GCR_cBin27812_Ctg1_148	G	23	0.370968	0.00206438	0.0454355
GCR_cBin26855_Ctg1_110	A	54	0.84375	0.00216675	0.0465483
GCR_cBin26855_Ctg1_110	C	10	0.15625	0.00216675	0.0465483
GCR_cBin39664_Ctg1_85	G	64	1	0	0
GCR_cBin38208_Ctg1_21	A	64	1	0	0
ESTV_15118_153	G	64	1	0	0
GCR_cBin47268_Ctg1_70	G	64	1	0	0
GCR_cBin47268_Ctg1_73	A	62	0.96875	0.000457764	0.0213954
GCR_cBin47268_Ctg1_73	G	2	0.03125	0.000457764	0.0213954
ESTNV_34296_693	A	54	0.84375	0.00167847	0.0409691
ESTNV_34296_693	T	10	0.15625	0.00167847	0.0409691
GCR_cBin18023_Ctg1_41	C	54	0.84375	0.00167847	0.0409691
GCR_cBin18023_Ctg1_41	G	10	0.15625	0.00167847	0.0409691
ESTNV_36480_1354	A	15	0.234375	0.0019455	0.0441078
ESTNV_36480_1354	T	49	0.765625	0.0019455	0.0441078
GCR_cBin34894_Ctg1_621	G	64	1	0	0
GCR_cBin26436_Ctg1_42	A	60	0.9375	0.000854492	0.0292317
GCR_cBin26436_Ctg1_42	G	4	0.0625	0.000854492	0.0292317
GCR_cBin24398_Ctg1_117	G	64	1	0	0
GCR_cBin3706_Ctg1_364	G	64	1	0	0
GCR_cBin23307_Ctg1_194	C	64	1	0	0
GCR_cBin12132_Ctg1_186	A	15	0.234375	0.00292206	0.0540561
GCR_cBin12132_Ctg1_186	G	49	0.765625	0.00292206	0.0540561
GCR_cBin5178_Ctg1_86	A	18	0.28125	0.00338745	0.0582018
GCR_cBin5178_Ctg1_86	G	46	0.71875	0.00338745	0.0582018
GCR_cBin12749_Ctg1_233	A	64	1	0	0
GCR_cBin45817_Ctg1_71	G	64	1	0	0
ESTNV_26350_156	C	64	1	0	0
ESTNV_21694_208	G	64	1	0	0
ESTNV_29851_266	A	20	0.3125	0.0032959	0.0574099
ESTNV_29851_266	G	44	0.6875	0.0032959	0.0574099
GCR_cBin19407_Ctg1_54	A	33	0.515625	0.00414276	0.0643643
GCR_cBin19407_Ctg1_54	G	31	0.484375	0.00414276	0.0643643
GCR_cBin12450_Ctg1_432	C	64	1	0	0
ESTV_14230_80	A	17	0.265625	0.00341034	0.0583981
ESTV_14230_80	C	47	0.734375	0.00341034	0.0583981
GCR_cBin5917_Ctg1_208	A	64	1	0	0
GCR_cBin1185_Ctg1_145	A	14	0.21875	0.00241089	0.0491008
GCR_cBin1185_Ctg1_145	G	50	0.78125	0.00241089	0.0491008
GCR_hBin21729_Ctg1_51	A	64	1	0	0
GCR_cBin37146_Ctg1_312	C	11	0.171875	0.00225067	0.0474412
GCR_cBin37146_Ctg1_312	G	53	0.828125	0.00225067	0.0474412
GCR_cBin5718_Ctg1_42	A	55	0.859375	0.00206757	0.0454705
GCR_cBin5718_Ctg1_42	G	9	0.140625	0.00206757	0.0454705
GCR_cBin32973_Ctg1_81	A	64	1	0	0
GCR_cBin32973_Ctg1_29	A	24	0.375	0.00390625	0.0625
GCR_cBin32973_Ctg1_29	G	40	0.625	0.00390625	0.0625
ESTNV_22623_238	A	49	0.765625	0.00341034	0.0583981
ESTNV_22623_238	G	15	0.234375	0.00341034	0.0583981
GCR_cBin35013_Ctg1_144	A	21	0.35	0.00397222	0.0630256
GCR_cBin35013_Ctg1_144	G	39	0.65	0.00397222	0.0630256
ESTNV_33390_1703	A	41	0.640625	0.00353241	0.0594341
ESTNV_33390_1703	G	23	0.359375	0.00353241	0.0594341
GCR_cBin28945_Ctg1_147	A	16	0.25	0.00292969	0.0541266
GCR_cBin28945_Ctg1_147	G	48	0.75	0.00292969	0.0541266
ESTNV_35898_1062	A	26	0.40625	0.00460815	0.0678834
ESTNV_35898_1062	G	38	0.59375	0.00460815	0.0678834
GCR_cBin26038_Ctg1_203	A	52	0.8125	0.00183105	0.0427908
GCR_cBin26038_Ctg1_203	G	12	0.1875	0.00183105	0.0427908
GCR_cBin5440_Ctg1_39	A	64	1	0	0
GCR_cBin32127_Ctg1_234	A	46	0.71875	0.00241089	0.0491008
GCR_cBin32127_Ctg1_234	G	18	0.28125	0.00241089	0.0491008
GCR_hBin19696_Ctg1_47	A	25	0.390625	0.00279999	0.0529149
GCR_hBin19696_Ctg1_47	G	39	0.609375	0.00279999	0.0529149
GCR_cBin32127_Ctg1_245	A	18	0.28125	0.00241089	0.0491008
GCR_cBin32127_Ctg1_245	C	46	0.71875	0.00241089	0.0491008
ESTNV_27431_454	A	40	0.625	0.00292969	0.0541266
ESTNV_27431_454	G	24	0.375	0.00292969	0.0541266
BASS14_B7_A02_640	A	45	0.703125	0.0033493	0.0578732
BASS14_B7_A02_640	C	19	0.296875	0.0033493	0.0578732
GCR_cBin41946_Ctg1_167	A	56	0.875	0.00146484	0.0382733
GCR_cBin41946_Ctg1_167	G	8	0.125	0.00146484	0.0382733
GCR_cBin41946_Ctg1_89	C	56	0.875	0.00146484	0.0382733
GCR_cBin41946_Ctg1_89	G	8	0.125	0.00146484	0.0382733
ESTNV_16068_255	C	64	1	0	0
GCR_cBin49053_Ctg1_111	A	1	0.015625	0.000236511	0.0153789
GCR_cBin49053_Ctg1_111	G	63	0.984375	0.000236511	0.0153789
ESTNV_35810_833	A	16	0.25	0.00195312	0.0441942
ESTNV_35810_833	C	48	0.75	0.00195312	0.0441942
GCR_hBin18139_Ctg1_60	A	24	0.375	0.00390625	0.0625
GCR_hBin18139_Ctg1_60	C	40	0.625	0.00390625	0.0625
GCR_hBin18139_Ctg1_230	A	24	0.375	0.00390625	0.0625
GCR_hBin18139_Ctg1_230	G	40	0.625	0.00390625	0.0625
ESTNV_35810_643	A	27	0.421875	0.00444794	0.0666929
ESTNV_35810_643	C	37	0.578125	0.00444794	0.0666929
ESTNV_17527_71	C	27	0.421875	0.00444794	0.0666929
ESTNV_17527_71	G	37	0.578125	0.00444794	0.0666929
ESTNV_28091_630	A	64	1	0	0
ESTNV_25175_634	A	6	0.09375	0.00119019	0.0344991
ESTNV_25175_634	T	58	0.90625	0.00119019	0.0344991
GCR_cBin25193_Ctg1_80	A	1	0.015625	0.000236511	0.0153789
GCR_cBin25193_Ctg1_80	G	63	0.984375	0.000236511	0.0153789
ESTNV_27318_155	A	64	1	0	0
GCR_cBin1418_Ctg1_135	A	3	0.046875	0.000663757	0.0257635
GCR_cBin1418_Ctg1_135	C	61	0.953125	0.000663757	0.0257635
ESTNV_31116_191	A	60	0.9375	0.000854492	0.0292317
ESTNV_31116_191	T	4	0.0625	0.000854492	0.0292317
ESTNV_25321_192	A	5	0.078125	0.00102997	0.0320931
ESTNV_25321_192	G	59	0.921875	0.00102997	0.0320931
ESTNV_29115_481	A	34	0.53125	0.00436401	0.0660607
ESTNV_29115_481	C	30	0.46875	0.00436401	0.0660607
GCR_cBin19598_Ctg1_176	G	64	1	0	0
ESTNV_31863_1602	T	64	1	0	0
GCR_cBin545_Ctg1_206	C	64	1	0	0
BASS11_B7_G05_472	C	64	1	0	0
GCR_cBin17574_Ctg1_128	C	64	1	0	0
BASS11_B7_G05_384	A	36	0.5625	0.00427246	0.0653641
BASS11_B7_G05_384	C	28	0.4375	0.00427246	0.0653641
BASS11_B7_G05_691	C	64	1	0	0
ESTNV_23544_330	C	64	1	0	0
BASS117_B7_E04_685	A	3	0.046875	0.000663757	0.0257635
BASS117_B7_E04_685	G	61	0.953125	0.000663757	0.0257635
BASS117_B7_E04_554	A	61	0.953125	0.000663757	0.0257635
BASS117_B7_E04_554	G	3	0.046875	0.000663757	0.0257635
GCR_cBin50585_Ctg1_139	C	64	1	0	0
GCR_cBin37317_Ctg1_131	C	10	0.15625	0.00216675	0.0465483
GCR_cBin37317_Ctg1_131	G	54	0.84375	0.00216675	0.0465483
ESTNV_33213_337	T	64	1	0	0
GCR_hBin35252_Ctg1_84	A	64	1	0	0
GCR_cBin6519_Ctg1_383	G	64	1	0	0
GCR_cBin6519_Ctg1_116	T	64	1	0	0
GCR_cBin16390_Ctg1_172	C	64	1	0	0
ESTNV_30332_660	G	64	1	0	0
GCR_cBin37317_Ctg1_184	A	54	0.84375	0.00216675	0.0465483
GCR_cBin37317_Ctg1_184	G	10	0.15625	0.00216675	0.0465483
GCR_cBin16390_Ctg1_190	A	64	1	0	0
ESTNV_34569_1252	C	64	1	0	0
ESTV_14468_119	G	64	1	0	0
ESTV_18722_351	A	8	0.125	0.00195312	0.0441942
ESTV_18722_351	G	56	0.875	0.00195312	0.0441942
ESTNV_36348_720	A	56	0.875	0.00195312	0.0441942
ESTNV_36348_720	C	8	0.125	0.00195312	0.0441942
ESTNV_28229_1264	A	64	1	0	0
ESTNV_34569_753	C	64	1	0	0
ESTNV_33934_55	A	64	1	0	0
BASS115_B6A_H02_496	C	64	1	0	0
GCR_cBin15671_Ctg1_125	A	60	0.9375	0.000854492	0.0292317
GCR_cBin15671_Ctg1_125	T	4	0.0625	0.000854492	0.0292317
GCR_cBin48621_Ctg1_143	A	42	0.65625	0.00216675	0.0465483
GCR_cBin48621_Ctg1_143	C	22	0.34375	0.00216675	0.0465483
ESTNV_36486_673	C	22	0.34375	0.00216675	0.0465483
ESTNV_36486_673	G	42	0.65625	0.00216675	0.0465483
GCR_cBin26183_Ctg1_163	A	51	0.796875	0.00188446	0.0434104
GCR_cBin26183_Ctg1_163	G	13	0.203125	0.00188446	0.0434104
GCR_cBin48621_Ctg1_146	A	22	0.34375	0.00216675	0.0465483
GCR_cBin48621_Ctg1_146	G	42	0.65625	0.00216675	0.0465483
ESTNV_31699_1208	C	64	1	0	0
ESTNV_36170_1803	A	10	0.15625	0.00167847	0.0409691
ESTNV_36170_1803	G	54	0.84375	0.00167847	0.0409691
ESTNV_26803_666	A	4	0.0625	0.000854492	0.0292317
ESTNV_26803_666	G	60	0.9375	0.000854492	0.0292317
GCR_cBin24983_Ctg1_211	A	11	0.171875	0.00176239	0.0419808
GCR_cBin24983_Ctg1_211	C	53	0.828125	0.00176239	0.0419808
GCR_cBin33457_Ctg1_198	A	18	0.28125	0.00241089	0.0491008
GCR_cBin33457_Ctg1_198	C	46	0.71875	0.00241089	0.0491008
GCR_cBin38774_Ctg1_204	C	64	1	0	0
ESTNV_36426_226	A	64	1	0	0
GCR_cBin33503_Ctg1_290	G	64	1	0	0
ESTV_15074_164	A	59	0.921875	0.00102997	0.0320931
ESTV_15074_164	G	5	0.078125	0.00102997	0.0320931
ESTNV_36002_1472	A	7	0.109375	0.00133514	0.0365396
ESTNV_36002_1472	G	57	0.890625	0.00133514	0.0365396
ESTNV_15285_387	C	59	0.921875	0.00102997	0.0320931
ESTNV_15285_387	G	5	0.078125	0.00102997	0.0320931
GCR_cBin27216_Ctg1_405	G	64	1	0	0
GCR_cBin8947_Ctg1_161	A	16	0.25	0.00292969	0.0541266
GCR_cBin8947_Ctg1_161	G	48	0.75	0.00292969	0.0541266
GCR_cBin33503_Ctg1_345	A	24	0.4	0.003	0.0547723
GCR_cBin33503_Ctg1_345	G	36	0.6	0.003	0.0547723
GCR_cBin48593_Ctg1_152	A	14	0.21875	0.00241089	0.0491008
GCR_cBin48593_Ctg1_152	C	50	0.78125	0.00241089	0.0491008
GCR_cBin47309_Ctg1_158	C	37	0.578125	0.00444794	0.0666929
GCR_cBin47309_Ctg1_158	G	27	0.421875	0.00444794	0.0666929
GCR_hBin21216_Ctg1_199	A	64	1	0	0
GCR_cBin31719_Ctg1_177	A	64	1	0	0
GCR_cBin19824_Ctg1_145	A	50	0.78125	0.00289917	0.0538439
GCR_cBin19824_Ctg1_145	G	14	0.21875	0.00289917	0.0538439
ESTNV_25685_546	G	64	1	0	0
ESTNV_33470_753	A	64	1	0	0
ESTNV_27944_196	A	61	0.953125	0.000663757	0.0257635
ESTNV_27944_196	T	3	0.046875	0.000663757	0.0257635
ESTNV_36724_118	A	18	0.28125	0.00338745	0.0582018
ESTNV_36724_118	G	46	0.71875	0.00338745	0.0582018
ESTNV_35192_247	A	2	0.03125	0.000457764	0.0213954
ESTNV_35192_247	T	62	0.96875	0.000457764	0.0213954
BASS114_B6A_B06_105	A	55	0.859375	0.00157928	0.0397402
BASS114_B6A_B06_105	C	9	0.140625	0.00157928	0.0397402
ESTNV_35192_126	A	8	0.125	0.00146484	0.0382733
ESTNV_35192_126	C	56	0.875	0.00146484	0.0382733
GCR_cBin25759_Ctg1_44	C	11	0.171875	0.00225067	0.0474412
GCR_cBin25759_Ctg1_44	G	53	0.828125	0.00225067	0.0474412
GCR_cBin29181_Ctg1_51	A	21	0.328125	0.0042038	0.0648367
GCR_cBin29181_Ctg1_51	T	43	0.671875	0.0042038	0.0648367
ESTV_17694_278	A	7	0.109375	0.00133514	0.0365396
ESTV_17694_278	G	57	0.890625	0.00133514	0.0365396
GCR_cBin698_Ctg1_258	A	56	0.875	0.00146484	0.0382733
GCR_cBin698_Ctg1_258	T	8	0.125	0.00146484	0.0382733
GCR_cBin698_Ctg1_256	A	8	0.125	0.00146484	0.0382733
GCR_cBin698_Ctg1_256	T	56	0.875	0.00146484	0.0382733
GCR_cBin698_Ctg1_215	A	56	0.875	0.00146484	0.0382733
GCR_cBin698_Ctg1_215	G	8	0.125	0.00146484	0.0382733
GCR_cBin698_Ctg1_125	A	61	0.953125	0.000663757	0.0257635
GCR_cBin698_Ctg1_125	G	3	0.046875	0.000663757	0.0257635
ESTNV_34783_687	A	57	0.890625	0.00133514	0.0365396
ESTNV_34783_687	G	7	0.109375	0.00133514	0.0365396
GCR_cBin705_Ctg1_218	A	35	0.546875	0.00310516	0.055724
GCR_cBin705_Ctg1_218	G	29	0.453125	0.00310516	0.055724
GCR_cBin705_Ctg1_366	A	29	0.453125	0.00310516	0.055724
GCR_cBin705_Ctg1_366	G	35	0.546875	0.00310516	0.055724
GCR_cBin705_Ctg1_123	A	28	0.4375	0.00280762	0.052987
GCR_cBin705_Ctg1_123	G	36	0.5625	0.00280762	0.052987
GCR_cBin19367_Ctg1_143	A	64	1	0	0
ESTV_15107_389	A	7	0.109375	0.00133514	0.0365396
ESTV_15107_389	G	57	0.890625	0.00133514	0.0365396
ESTNV_36706_574	A	57	0.890625	0.00133514	0.0365396
ESTNV_36706_574	C	7	0.109375	0.00133514	0.0365396
ESTNV_27242_211	C	15	0.234375	0.00243378	0.0493333
ESTNV_27242_211	G	49	0.765625	0.00243378	0.0493333
ESTV_20675_499	A	7	0.109375	0.00133514	0.0365396
ESTV_20675_499	G	57	0.890625	0.00133514	0.0365396
GCR_cBin8347_Ctg1_155	A	35	0.546875	0.00310516	0.055724
GCR_cBin8347_Ctg1_155	T	29	0.453125	0.00310516	0.055724
GCR_hBin46188_Ctg1_237	T	64	1	0	0
GCR_cBin28712_Ctg1_124	C	64	1	0	0
GCR_hBin44277_Ctg1_106	A	64	1	0	0
ESTNV_36490_690	C	64	1	0	0
ESTV_21365_54	A	64	1	0	0
ESTNV_30166_762	C	63	0.984375	0.000236511	0.0153789
ESTNV_30166_762	G	1	0.015625	0.000236511	0.0153789
ESTNV_26125_188	A	42	0.65625	0.00314331	0.0560652
ESTNV_26125_188	C	22	0.34375	0.00314331	0.0560652
ESTNV_35823_463	A	1	0.015625	0.000236511	0.0153789
ESTNV_35823_463	C	63	0.984375	0.000236511	0.0153789
GCR_cBin42387_Ctg1_56	A	31	0.484375	0.0031662	0.056269
GCR_cBin42387_Ctg1_56	G	33	0.515625	0.0031662	0.056269
ESTNV_36853_78	C	42	0.65625	0.00314331	0.0560652
ESTNV_36853_78	G	22	0.34375	0.00314331	0.0560652
ESTNV_27947_584	A	22	0.34375	0.00314331	0.0560652
ESTNV_27947_584	T	42	0.65625	0.00314331	0.0560652
ESTNV_34937_1396	A	14	0.21875	0.00241089	0.0491008
ESTNV_34937_1396	C	50	0.78125	0.00241089	0.0491008
GCR_cBin21639_Ctg1_129	A	35	0.546875	0.00359344	0.0599453
GCR_cBin21639_Ctg1_129	G	29	0.453125	0.00359344	0.0599453
GCR_cBin13830_Ctg1_156	A	14	0.21875	0.00192261	0.0438475
GCR_cBin13830_Ctg1_156	G	50	0.78125	0.00192261	0.0438475
GCR_cBin9325_Ctg1_629	C	14	0.21875	0.00192261	0.0438475
GCR_cBin9325_Ctg1_629	G	50	0.78125	0.00192261	0.0438475
ESTNV_28515_410	C	64	1	0	0
ESTNV_26964_711	A	1	0.015625	0.000236511	0.0153789
ESTNV_26964_711	G	63	0.984375	0.000236511	0.0153789
GCR_cBin40533_Ctg1_184	A	63	0.984375	0.000236511	0.0153789
GCR_cBin40533_Ctg1_184	G	1	0.015625	0.000236511	0.0153789
ESTNV_26964_592	A	1	0.015625	0.000236511	0.0153789
ESTNV_26964_592	G	63	0.984375	0.000236511	0.0153789
GCR_cBin35156_Ctg1_47	A	13	0.203125	0.00237274	0.0487108
GCR_cBin35156_Ctg1_47	G	51	0.796875	0.00237274	0.0487108
ESTNV_24363_306	A	60	0.9375	0.000854492	0.0292317
ESTNV_24363_306	C	4	0.0625	0.000854492	0.0292317
ESTNV_32353_1231	A	14	0.21875	0.00241089	0.0491008
ESTNV_32353_1231	C	50	0.78125	0.00241089	0.0491008
GCR_cBin9554_Ctg1_111	A	61	0.953125	0.000663757	0.0257635
GCR_cBin9554_Ctg1_111	C	3	0.046875	0.000663757	0.0257635
GCR_cBin23594_Ctg1_69	A	12	0.1875	0.00183105	0.0427908
GCR_cBin23594_Ctg1_69	C	52	0.8125	0.00183105	0.0427908
GCR_cBin7278_Ctg1_101	A	47	0.734375	0.00292206	0.0540561
GCR_cBin7278_Ctg1_101	C	17	0.265625	0.00292206	0.0540561
GCR_cBin7278_Ctg1_140	A	47	0.734375	0.00292206	0.0540561
GCR_cBin7278_Ctg1_140	G	17	0.265625	0.00292206	0.0540561
GCR_cBin42013_Ctg1_64	A	64	1	0	0
ESTNV_30341_1348	A	21	0.328125	0.00371552	0.060955
ESTNV_30341_1348	T	43	0.671875	0.00371552	0.060955
GCR_cBin17069_Ctg1_53	A	25	0.390625	0.00426483	0.0653057
GCR_cBin17069_Ctg1_53	G	39	0.609375	0.00426483	0.0653057
GCR_cBin630_Ctg1_411	A	17	0.265625	0.00341034	0.0583981
GCR_cBin630_Ctg1_411	G	47	0.734375	0.00341034	0.0583981
GCR_cBin43670_Ctg1_77	A	38	0.59375	0.00363159	0.0602627
GCR_cBin43670_Ctg1_77	G	26	0.40625	0.00363159	0.0602627
ESTV_15992_330	A	47	0.734375	0.00292206	0.0540561
ESTV_15992_330	G	17	0.265625	0.00292206	0.0540561
ESTNV_28270_603	A	64	1	0	0
ESTNV_35703_1395	A	25	0.390625	0.00426483	0.0653057
ESTNV_35703_1395	G	39	0.609375	0.00426483	0.0653057
ESTNV_24638_210	C	60	0.9375	0.000854492	0.0292317
ESTNV_24638_210	G	4	0.0625	0.000854492	0.0292317
ESTNV_36373_1935	A	64	1	0	0
ESTNV_27268_490	A	64	1	0	0
ESTNV_35486_1270	G	64	1	0	0
GCR_cBin36565_Ctg1_226	A	52	0.83871	0.00176228	0.0419795
GCR_cBin36565_Ctg1_226	G	10	0.16129	0.00176228	0.0419795
GCR_cBin10083_Ctg1_32	A	64	1	0	0
GCR_cBin21674_Ctg1_331	A	7	0.12069	0.00157858	0.0397314
GCR_cBin21674_Ctg1_331	T	51	0.87931	0.00157858	0.0397314
ESTV_13245_584	C	64	1	0	0
ESTNV_33113_353	A	64	1	0	0
GCR_hBin21729_Ctg1_168	G	64	1	0	0
GCR_hBin43280_Ctg1_61	C	64	1	0	0
ESTV_15739_295	G	64	1	0	0
ESTNV_34055_242	G	64	1	0	0
ESTV_16262_1716	A	6	0.09375	0.00119019	0.0344991
ESTV_16262_1716	G	58	0.90625	0.00119019	0.0344991
ESTNV_25199_261	A	64	1	0	0
GCR_cBin17416_Ctg1_223	A	28	0.4375	0.00231934	0.0481595
GCR_cBin17416_Ctg1_223	C	36	0.5625	0.00231934	0.0481595
GCR_hBin17624_Ctg1_81	C	64	1	0	0
GCR_cBin19146_Ctg1_97	A	60	0.9375	0.000854492	0.0292317
GCR_cBin19146_Ctg1_97	G	4	0.0625	0.000854492	0.0292317
ESTV_17233_535	A	3	0.046875	0.000663757	0.0257635
ESTV_17233_535	G	61	0.953125	0.000663757	0.0257635
ESTNV_23531_462	C	42	0.65625	0.00216675	0.0465483
ESTNV_23531_462	G	22	0.34375	0.00216675	0.0465483
ESTV_7881_334	A	46	0.741935	0.00253432	0.0503421
ESTV_7881_334	G	16	0.258065	0.00253432	0.0503421
GCR_cBin25027_Ctg1_137	A	64	1	0	0
GCR_cBin41451_Ctg1_172	A	55	0.859375	0.00206757	0.0454705
GCR_cBin41451_Ctg1_172	C	9	0.140625	0.00206757	0.0454705
ESTNV_32366_632	G	64	1	0	0
ESTNV_29209_356	A	9	0.140625	0.00206757	0.0454705
ESTNV_29209_356	G	55	0.859375	0.00206757	0.0454705
ESTNV_36510_599	A	63	0.984375	0.000236511	0.0153789
ESTNV_36510_599	G	1	0.015625	0.000236511	0.0153789
ESTV_15688_494	A	63	0.984375	0.000236511	0.0153789
ESTV_15688_494	G	1	0.015625	0.000236511	0.0153789
ESTNV_30757_471	A	18	0.28125	0.00338745	0.0582018
ESTNV_30757_471	G	46	0.71875	0.00338745	0.0582018
GCR_cBin3256_Ctg1_63	A	64	1	0	0
GCR_cBin836_Ctg1_394	A	10	0.15625	0.00216675	0.0465483
GCR_cBin836_Ctg1_394	C	54	0.84375	0.00216675	0.0465483
ESTNV_35640_75	C	64	1	0	0
GCR_cBin48467_Ctg1_35	C	64	1	0	0
ESTNV_23431_381	A	44	0.709677	0.00352455	0.059368
ESTNV_23431_381	G	18	0.290323	0.00352455	0.059368
ESTNV_37039_99	A	64	1	0	0
GCR_cBin1859_Ctg1_276	G	64	1	0	0
GCR_cBin11134_Ctg1_164	A	5	0.078125	0.00102997	0.0320931
GCR_cBin11134_Ctg1_164	G	59	0.921875	0.00102997	0.0320931
GCR_cBin11134_Ctg1_43	A	5	0.078125	0.00102997	0.0320931
GCR_cBin11134_Ctg1_43	G	59	0.921875	0.00102997	0.0320931
GCR_cBin4983_Ctg1_416	A	64	1	0	0
GCR_cBin18961_Ctg1_75	C	37	0.578125	0.00298309	0.0546177
GCR_cBin18961_Ctg1_75	G	27	0.421875	0.00298309	0.0546177
ESTV_8181_51	A	63	0.984375	0.000236511	0.0153789
ESTV_8181_51	G	1	0.015625	0.000236511	0.0153789
ESTNV_26621_493	A	64	1	0	0
ESTNV_23711_205	A	64	1	0	0
ESTV_17538_85	A	20	0.3125	0.00231934	0.0481595
ESTV_17538_85	G	44	0.6875	0.00231934	0.0481595
GCR_cBin2733_Ctg1_528	A	20	0.3125	0.00231934	0.0481595
GCR_cBin2733_Ctg1_528	G	44	0.6875	0.00231934	0.0481595
ESTNV_33243_1092	A	17	0.265625	0.00243378	0.0493333
ESTNV_33243_1092	G	47	0.734375	0.00243378	0.0493333
ESTNV_25889_239	A	29	0.453125	0.00310516	0.055724
ESTNV_25889_239	G	35	0.546875	0.00310516	0.055724
ESTNV_33243_235	A	29	0.453125	0.00310516	0.055724
ESTNV_33243_235	G	35	0.546875	0.00310516	0.055724
GCR_cBin32739_Ctg1_78	A	63	0.984375	0.000236511	0.0153789
GCR_cBin32739_Ctg1_78	G	1	0.015625	0.000236511	0.0153789
ESTNV_29403_553	A	56	0.875	0.00146484	0.0382733
ESTNV_29403_553	G	8	0.125	0.00146484	0.0382733
GCR_cBin25248_Ctg1_228	C	64	1	0	0
ESTNV_34987_849	C	64	1	0	0
ESTNV_34987_996	G	64	1	0	0
GCR_cBin6804_Ctg1_170	A	64	1	0	0
ESTNV_27342_254	A	25	0.390625	0.00377655	0.0614536
ESTNV_27342_254	G	39	0.609375	0.00377655	0.0614536
ESTV_16240_204	G	64	1	0	0
GCR_cBin29831_Ctg1_68	G	64	1	0	0
ESTNV_32051_1570	A	16	0.25	0.00244141	0.0494106
ESTNV_32051_1570	G	48	0.75	0.00244141	0.0494106
BASS13_B7_B07_761	A	48	0.75	0.00244141	0.0494106
BASS13_B7_B07_761	G	16	0.25	0.00244141	0.0494106
GCR_cBin28152_Ctg1_60	A	64	1	0	0
GCR_cBin28152_Ctg1_185	A	64	1	0	0
GCR_cBin14203_Ctg1_147	A	12	0.1875	0.0032959	0.0574099
GCR_cBin14203_Ctg1_147	C	52	0.8125	0.0032959	0.0574099
GCR_cBin15266_Ctg1_58	A	64	1	0	0
GCR_cBin6804_Ctg1_99	A	64	1	0	0
GCR_cBin24972_Ctg1_42	G	64	1	0	0
GCR_cBin31996_Ctg1_226	A	60	0.9375	0.000854492	0.0292317
GCR_cBin31996_Ctg1_226	T	4	0.0625	0.000854492	0.0292317
GCR_cBin31996_Ctg1_169	A	60	0.9375	0.000854492	0.0292317
GCR_cBin31996_Ctg1_169	G	4	0.0625	0.000854492	0.0292317
GCR_cBin34406_Ctg1_88	A	64	1	0	0
GCR_cBin43448_Ctg1_152	C	64	1	0	0
ESTNV_32001_1134	A	48	0.75	0.00292969	0.0541266
ESTNV_32001_1134	G	16	0.25	0.00292969	0.0541266
GCR_hBin13605_Ctg1_93	A	58	0.90625	0.00119019	0.0344991
GCR_hBin13605_Ctg1_93	C	6	0.09375	0.00119019	0.0344991
GCR_cBin20942_Ctg1_68	A	17	0.283333	0.00426852	0.0653339
GCR_cBin20942_Ctg1_68	C	43	0.716667	0.00426852	0.0653339
GCR_cBin49210_Ctg1_198	G	64	1	0	0
GCR_cBin20942_Ctg1_63	A	47	0.734375	0.00389862	0.0624389
GCR_cBin20942_Ctg1_63	C	17	0.265625	0.00389862	0.0624389
GCR_cBin7112_Ctg1_397	A	61	0.953125	0.00115204	0.0339417
GCR_cBin7112_Ctg1_397	C	3	0.046875	0.00115204	0.0339417
GCR_cBin37669_Ctg1_32	A	3	0.046875	0.000663757	0.0257635
GCR_cBin37669_Ctg1_32	G	61	0.953125	0.000663757	0.0257635
ESTNV_34868_337	C	64	1	0	0
ESTNV_22661_681	G	64	1	0	0
GCR_cBin27851_Ctg1_509	A	2	0.03125	0.000457764	0.0213954
GCR_cBin27851_Ctg1_509	T	62	0.96875	0.000457764	0.0213954
GCR_cBin27851_Ctg1_590	A	2	0.03125	0.000457764	0.0213954
GCR_cBin27851_Ctg1_590	G	62	0.96875	0.000457764	0.0213954
ESTNV_30354_106	A	64	1	0	0
ESTNV_30411_506	C	64	1	0	0
ESTNV_33967_1368	G	64	1	0	0
GCR_cBin38527_Ctg1_75	C	64	1	0	0
ESTNV_33967_1551	A	64	1	0	0
GCR_cBin3280_Ctg1_169	A	64	1	0	0
ESTV_15445_193	A	57	0.919355	0.00109093	0.0330293
ESTV_15445_193	G	5	0.0806452	0.00109093	0.0330293
GCR_cBin3280_Ctg1_135	A	37	0.578125	0.00249481	0.0499481
GCR_cBin3280_Ctg1_135	G	27	0.421875	0.00249481	0.0499481
ESTV_12252_166	G	64	1	0	0
GCR_cBin37519_Ctg1_244	A	62	0.96875	0.000457764	0.0213954
GCR_cBin37519_Ctg1_244	C	2	0.03125	0.000457764	0.0213954
ESTNV_35410_1102	C	64	1	0	0
ESTNV_37136_732	A	20	0.3125	0.00231934	0.0481595
ESTNV_37136_732	G	44	0.6875	0.00231934	0.0481595
GCR_cBin8284_Ctg1_213	C	34	0.53125	0.00241089	0.0491008
GCR_cBin8284_Ctg1_213	G	30	0.46875	0.00241089	0.0491008
GCR_cBin5316_Ctg2_193	A	60	0.9375	0.000854492	0.0292317
GCR_cBin5316_Ctg2_193	T	4	0.0625	0.000854492	0.0292317
GCR_cBin45701_Ctg1_227	A	52	0.8125	0.00183105	0.0427908
GCR_cBin45701_Ctg1_227	G	12	0.1875	0.00183105	0.0427908
ESTNV_31893_467	A	14	0.21875	0.00241089	0.0491008
ESTNV_31893_467	G	50	0.78125	0.00241089	0.0491008
ESTNV_31893_226	A	64	1	0	0
GCR_cBin16365_Ctg1_475	A	21	0.328125	0.00371552	0.060955
GCR_cBin16365_Ctg1_475	C	43	0.671875	0.00371552	0.060955
ESTV_21702_136	A	64	1	0	0
ESTV_16902_235	A	27	0.421875	0.00298309	0.0546177
ESTV_16902_235	C	37	0.578125	0.00298309	0.0546177
ESTNV_36697_1478	A	25	0.390625	0.00377655	0.0614536
ESTNV_36697_1478	G	39	0.609375	0.00377655	0.0614536
GCR_cBin26271_Ctg1_32	A	64	1	0	0
ESTNV_33477_1310	G	64	1	0	0
GCR_cBin17329_Ctg2_166	A	64	1	0	0
GCR_hBin21648_Ctg1_137	A	64	1	0	0
ESTV_21377_436	A	64	1	0	0
GCR_cBin12401_Ctg1_186	A	64	1	0	0
GCR_cBin1955_Ctg1_60	A	16	0.25	0.00292969	0.0541266
GCR_cBin1955_Ctg1_60	G	48	0.75	0.00292969	0.0541266
GCR_cBin30689_Ctg1_25	A	1	0.015625	0.000236511	0.0153789
GCR_cBin30689_Ctg1_25	T	63	0.984375	0.000236511	0.0153789
ESTNV_36095_1044	C	64	1	0	0
GCR_cBin43112_Ctg1_86	A	47	0.734375	0.00292206	0.0540561
GCR_cBin43112_Ctg1_86	G	17	0.265625	0.00292206	0.0540561
ESTNV_36751_1595	A	22	0.34375	0.00460815	0.0678834
ESTNV_36751_1595	G	42	0.65625	0.00460815	0.0678834
GCR_cBin22374_Ctg1_508	A	48	0.75	0.00341797	0.0584634
GCR_cBin22374_Ctg1_508	G	16	0.25	0.00341797	0.0584634
ESTNV_19996_365	A	32	0.5	0.00439453	0.0662913
ESTNV_19996_365	G	32	0.5	0.00439453	0.0662913
ESTNV_36998_1021	A	33	0.515625	0.00414276	0.0643643
ESTNV_36998_1021	G	31	0.484375	0.00414276	0.0643643
ESTNV_36516_128	C	63	0.984375	0.000236511	0.0153789
ESTNV_36516_128	G	1	0.015625	0.000236511	0.0153789
GCR_cBin14440_Ctg1_49	A	22	0.34375	0.00363159	0.0602627
GCR_cBin14440_Ctg1_49	G	42	0.65625	0.00363159	0.0602627
GCR_cBin3627_Ctg1_142	C	64	1	0	0
BASS113_B7_G12_644	A	9	0.140625	0.00157928	0.0397402
BASS113_B7_G12_644	G	55	0.859375	0.00157928	0.0397402
ESTNV_32044_621	A	54	0.84375	0.00167847	0.0409691
ESTNV_32044_621	G	10	0.15625	0.00167847	0.0409691
GCR_cBin52996_Ctg1_137	A	24	0.375	0.00341797	0.0584634
GCR_cBin52996_Ctg1_137	G	40	0.625	0.00341797	0.0584634
GCR_cBin21125_Ctg1_53	C	64	1	0	0
GCR_cBin13800_Ctg1_159	A	33	0.515625	0.0031662	0.056269
GCR_cBin13800_Ctg1_159	G	31	0.484375	0.0031662	0.056269
ESTNV_29541_872	A	30	0.46875	0.00338745	0.0582018
ESTNV_29541_872	G	34	0.53125	0.00338745	0.0582018
ESTNV_29541_288	A	30	0.46875	0.00338745	0.0582018
ESTNV_29541_288	C	34	0.53125	0.00338745	0.0582018
GCR_cBin28164_Ctg1_223	A	50	0.78125	0.00192261	0.0438475
GCR_cBin28164_Ctg1_223	G	14	0.21875	0.00192261	0.0438475
ESTNV_29967_108	A	31	0.484375	0.0031662	0.056269
ESTNV_29967_108	G	33	0.515625	0.0031662	0.056269
GCR_cBin8926_Ctg1_226	G	64	1	0	0
ESTNV_33458_777	A	17	0.265625	0.00292206	0.0540561
ESTNV_33458_777	G	47	0.734375	0.00292206	0.0540561
ESTNV_27886_813	A	16	0.25	0.00390625	0.0625
ESTNV_27886_813	G	48	0.75	0.00390625	0.0625
GCR_hBin27145_Ctg1_110	A	39	0.609375	0.00377655	0.0614536
GCR_hBin27145_Ctg1_110	G	25	0.390625	0.00377655	0.0614536
ESTNV_33232_155	C	64	1	0	0
ESTNV_24376_271	G	64	1	0	0
ESTNV_35394_1479	A	5	0.078125	0.00102997	0.0320931
ESTNV_35394_1479	G	59	0.921875	0.00102997	0.0320931
GCR_cBin31631_Ctg1_149	C	64	1	0	0
ESTNV_31107_540	A	13	0.203125	0.0033493	0.0578732
ESTNV_31107_540	C	51	0.796875	0.0033493	0.0578732
GCR_cBin16342_Ctg1_468	A	17	0.265625	0.00341034	0.0583981
GCR_cBin16342_Ctg1_468	G	47	0.734375	0.00341034	0.0583981
ESTV_19947_986	C	63	0.984375	0.000236511	0.0153789
ESTV_19947_986	G	1	0.015625	0.000236511	0.0153789
ESTNV_35822_817	A	17	0.265625	0.00292206	0.0540561
ESTNV_35822_817	G	47	0.734375	0.00292206	0.0540561
GCR_cBin6974_Ctg1_77	A	19	0.296875	0.0033493	0.0578732
GCR_cBin6974_Ctg1_77	G	45	0.703125	0.0033493	0.0578732
GCR_cBin27619_Ctg1_193	A	4	0.0625	0.000854492	0.0292317
GCR_cBin27619_Ctg1_193	G	60	0.9375	0.000854492	0.0292317
GCR_cBin15029_Ctg1_250	C	6	0.09375	0.00119019	0.0344991
GCR_cBin15029_Ctg1_250	G	58	0.90625	0.00119019	0.0344991
GCR_cBin2599_Ctg1_262	A	59	0.921875	0.00102997	0.0320931
GCR_cBin2599_Ctg1_262	T	5	0.078125	0.00102997	0.0320931
ESTNV_24613_246	A	53	0.828125	0.00273895	0.052335
ESTNV_24613_246	C	11	0.171875	0.00273895	0.052335
ESTNV_29500_554	A	12	0.1875	0.00231934	0.0481595
ESTNV_29500_554	C	52	0.8125	0.00231934	0.0481595
ESTV_16239_605	C	31	0.484375	0.00414276	0.0643643
ESTV_16239_605	G	33	0.515625	0.00414276	0.0643643
ESTV_16905_208	G	64	1	0	0
GCR_cBin283_Ctg1_120	T	62	1	0	0
ESTNV_34118_596	A	13	0.203125	0.00286102	0.0534885
ESTNV_34118_596	G	51	0.796875	0.00286102	0.0534885
ESTNV_16766_113	A	64	1	0	0
ESTNV_34068_665	A	45	0.703125	0.00286102	0.0534885
ESTNV_34068_665	G	19	0.296875	0.00286102	0.0534885
ESTNV_34451_135	A	17	0.265625	0.00341034	0.0583981
ESTNV_34451_135	G	47	0.734375	0.00341034	0.0583981
ESTNV_28701_207	A	11	0.171875	0.00225067	0.0474412
ESTNV_28701_207	C	53	0.828125	0.00225067	0.0474412
GCR_cBin1755_Ctg1_224	A	17	0.265625	0.00341034	0.0583981
GCR_cBin1755_Ctg1_224	G	47	0.734375	0.00341034	0.0583981
GCR_hBin32129_Ctg1_119	C	64	1	0	0
GCR_cBin1603_Ctg1_67	G	64	1	0	0
GCR_cBin20843_Ctg1_110	A	9	0.140625	0.00157928	0.0397402
GCR_cBin20843_Ctg1_110	G	55	0.859375	0.00157928	0.0397402
ESTV_21966_300	A	28	0.4375	0.00378418	0.0615157
ESTV_21966_300	G	36	0.5625	0.00378418	0.0615157
ESTNV_29234_195	A	52	0.8125	0.00280762	0.052987
ESTNV_29234_195	C	12	0.1875	0.00280762	0.052987
ESTV_18152_336	A	52	0.8125	0.00231934	0.0481595
ESTV_18152_336	T	12	0.1875	0.00231934	0.0481595
ESTNV_29391_150	A	64	1	0	0
GCR_cBin41648_Ctg1_124	A	64	1	0	0
ESTV_16288_295	C	27	0.421875	0.00395966	0.0629258
ESTV_16288_295	G	37	0.578125	0.00395966	0.0629258
ESTV_17470_405	A	10	0.15625	0.00216675	0.0465483
ESTV_17470_405	G	54	0.84375	0.00216675	0.0465483
ESTV_17405_76	C	19	0.296875	0.00481415	0.0693841
ESTV_17405_76	G	45	0.703125	0.00481415	0.0693841
ESTNV_32552_113	C	64	1	0	0
ESTNV_34925_2923	G	64	1	0	0
ESTNV_23083_64	A	37	0.578125	0.00395966	0.0629258
ESTNV_23083_64	G	27	0.421875	0.00395966	0.0629258
GCR_cBin22452_Ctg1_155	A	32	0.5	0.00341797	0.0584634
GCR_cBin22452_Ctg1_155	C	32	0.5	0.00341797	0.0584634
GCR_cBin22452_Ctg1_142	A	32	0.5	0.00341797	0.0584634
GCR_cBin22452_Ctg1_142	G	32	0.5	0.00341797	0.0584634
ESTNV_37675_1953	A	53	0.828125	0.00273895	0.052335
ESTNV_37675_1953	G	11	0.171875	0.00273895	0.052335
ESTNV_35592_1024	A	64	1	0	0
BASS118_B7_B11_507	A	16	0.25	0.00244141	0.0494106
BASS118_B7_B11_507	G	48	0.75	0.00244141	0.0494106
ESTNV_36582_634	G	64	1	0	0
ESTNV_28584_983	A	64	1	0	0
ESTNV_32001_1243	A	2	0.03125	0.000457764	0.0213954
ESTNV_32001_1243	G	62	0.96875	0.000457764	0.0213954
ESTNV_26671_385	A	64	1	0	0
GCR_cBin1134_Ctg1_360	A	1	0.015625	0.000236511	0.0153789
GCR_cBin1134_Ctg1_360	G	63	0.984375	0.000236511	0.0153789
BASS118_B7_B11_702	G	64	1	0	0
ESTNV_31895_1189	C	64	1	0	0
GCR_cBin50373_Ctg1_78	A	58	0.90625	0.00119019	0.0344991
GCR_cBin50373_Ctg1_78	C	6	0.09375	0.00119019	0.0344991
ESTNV_27544_95	C	64	1	0	0
ESTNV_31140_226	A	1	0.015625	0.000236511	0.0153789
ESTNV_31140_226	C	63	0.984375	0.000236511	0.0153789
ESTNV_31438_51	A	61	0.953125	0.000663757	0.0257635
ESTNV_31438_51	G	3	0.046875	0.000663757	0.0257635
ESTNV_32228_633	A	4	0.0625	0.000854492	0.0292317
ESTNV_32228_633	G	60	0.9375	0.000854492	0.0292317
GCR_cBin14555_Ctg1_93	A	64	1	0	0
GCR_cBin42832_Ctg1_109	A	61	0.953125	0.000663757	0.0257635
GCR_cBin42832_Ctg1_109	T	3	0.046875	0.000663757	0.0257635
GCR_cBin37379_Ctg1_47	A	19	0.296875	0.00286102	0.0534885
GCR_cBin37379_Ctg1_47	C	45	0.703125	0.00286102	0.0534885
ESTV_18493_1052	A	47	0.734375	0.00243378	0.0493333
ESTV_18493_1052	G	17	0.265625	0.00243378	0.0493333
ESTNV_34763_1056	A	18	0.28125	0.00192261	0.0438475
ESTNV_34763_1056	T	46	0.71875	0.00192261	0.0438475
ESTNV_34763_2153	A	25	0.390625	0.00426483	0.0653057
ESTNV_34763_2153	C	39	0.609375	0.00426483	0.0653057
GCR_cBin19457_Ctg1_45	A	27	0.421875	0.00395966	0.0629258
GCR_cBin19457_Ctg1_45	G	37	0.578125	0.00395966	0.0629258
GCR_cBin528_Ctg1_496	A	23	0.359375	0.00353241	0.0594341
GCR_cBin528_Ctg1_496	G	41	0.640625	0.00353241	0.0594341
ESTNV_34964_301	A	50	0.892857	0.00214103	0.0462713
ESTNV_34964_301	C	6	0.107143	0.00214103	0.0462713
GCR_rBin1448_Ctg1_97	A	12	0.1875	0.00231934	0.0481595
GCR_rBin1448_Ctg1_97	G	52	0.8125	0.00231934	0.0481595
GCR_rBin3760_Ctg1_98	C	12	0.1875	0.00231934	0.0481595
GCR_rBin3760_Ctg1_98	G	52	0.8125	0.00231934	0.0481595
GCR_cBin8933_Ctg1_66	C	64	1	0	0
GCR_cBin18827_Ctg1_195	A	4	0.0625	0.000854492	0.0292317
GCR_cBin18827_Ctg1_195	C	60	0.9375	0.000854492	0.0292317
GCR_cBin46701_Ctg1_110	A	47	0.734375	0.0019455	0.0441078
GCR_cBin46701_Ctg1_110	T	17	0.265625	0.0019455	0.0441078
ESTNV_34158_505	A	12	0.1875	0.00183105	0.0427908
ESTNV_34158_505	G	52	0.8125	0.00183105	0.0427908
GCR_cBin15768_Ctg1_57	A	41	0.640625	0.00304413	0.0551736
GCR_cBin15768_Ctg1_57	G	23	0.359375	0.00304413	0.0551736
GCR_cBin39368_Ctg1_207	A	1	0.015625	0.000236511	0.0153789
GCR_cBin39368_Ctg1_207	C	63	0.984375	0.000236511	0.0153789
ESTNV_35436_232	A	56	0.875	0.00146484	0.0382733
ESTNV_35436_232	T	8	0.125	0.00146484	0.0382733
ESTNV_33063_792	A	40	0.625	0.00341797	0.0584634
ESTNV_33063_792	G	24	0.375	0.00341797	0.0584634
GCR_cBin2200_Ctg1_90	A	7	0.109375	0.00133514	0.0365396
GCR_cBin2200_Ctg1_90	G	57	0.890625	0.00133514	0.0365396
ESTNV_23390_339	A	25	0.390625	0.00279999	0.0529149
ESTNV_23390_339	C	39	0.609375	0.00279999	0.0529149
GCR_cBin5359_Ctg1_235	C	62	1	0	0
ESTNV_19861_125	A	64	1	0	0
GCR_hBin33809_Ctg1_106	A	64	1	0	0
ESTNV_36266_544	A	60	0.9375	0.000854492	0.0292317
ESTNV_36266_544	C	4	0.0625	0.000854492	0.0292317
GCR_rBin3608_Ctg1_274	A	1	0.015625	0.000236511	0.0153789
GCR_rBin3608_Ctg1_274	G	63	0.984375	0.000236511	0.0153789
ESTNV_27444_1104	A	11	0.171875	0.00176239	0.0419808
ESTNV_27444_1104	G	53	0.828125	0.00176239	0.0419808
GCR_cBin50404_Ctg1_127	A	1	0.015625	0.000236511	0.0153789
GCR_cBin50404_Ctg1_127	C	63	0.984375	0.000236511	0.0153789
ESTNV_33311_572	A	63	0.984375	0.000236511	0.0153789
ESTNV_33311_572	T	1	0.015625	0.000236511	0.0153789
GCR_cBin38289_Ctg1_239	A	3	0.046875	0.000663757	0.0257635
GCR_cBin38289_Ctg1_239	G	61	0.953125	0.000663757	0.0257635
GCR_cBin52665_Ctg1_33	A	63	0.984375	0.000236511	0.0153789
GCR_cBin52665_Ctg1_33	C	1	0.015625	0.000236511	0.0153789
GCR_cBin6541_Ctg1_187	A	38	0.59375	0.00363159	0.0602627
GCR_cBin6541_Ctg1_187	G	26	0.40625	0.00363159	0.0602627
ESTNV_23136_481	A	59	0.921875	0.00102997	0.0320931
ESTNV_23136_481	C	5	0.078125	0.00102997	0.0320931
ESTNV_29410_233	A	22	0.34375	0.00314331	0.0560652
ESTNV_29410_233	G	42	0.65625	0.00314331	0.0560652
ESTNV_37581_1182	A	18	0.28125	0.00241089	0.0491008
ESTNV_37581_1182	G	46	0.71875	0.00241089	0.0491008
ESTV_16551_148	A	64	1	0	0
ESTV_16551_442	A	38	0.59375	0.00363159	0.0602627
ESTV_16551_442	G	26	0.40625	0.00363159	0.0602627
ESTNV_31278_125	A	14	0.21875	0.00241089	0.0491008
ESTNV_31278_125	C	50	0.78125	0.00241089	0.0491008
ESTNV_13016_93	A	50	0.78125	0.00338745	0.0582018
ESTNV_13016_93	G	14	0.21875	0.00338745	0.0582018
GCR_cBin6788_Ctg1_156	G	64	1	0	0
GCR_cBin25229_Ctg2_105	T	64	1	0	0
ESTV_15804_172	A	2	0.03125	0.000457764	0.0213954
ESTV_15804_172	G	62	0.96875	0.000457764	0.0213954
GCR_cBin50289_Ctg1_55	C	3	0.046875	0.000663757	0.0257635
GCR_cBin50289_Ctg1_55	G	61	0.953125	0.000663757	0.0257635
ESTNV_27780_352	A	62	0.96875	0.000457764	0.0213954
ESTNV_27780_352	G	2	0.03125	0.000457764	0.0213954
GCR_cBin735_Ctg2_314	C	1	0.015625	0.000236511	0.0153789
GCR_cBin735_Ctg2_314	G	63	0.984375	0.000236511	0.0153789
GCR_cBin5772_Ctg1_288	A	1	0.015625	0.000236511	0.0153789
GCR_cBin5772_Ctg1_288	C	63	0.984375	0.000236511	0.0153789
GCR_cBin28548_Ctg1_73	A	63	0.984375	0.000236511	0.0153789
GCR_cBin28548_Ctg1_73	G	1	0.015625	0.000236511	0.0153789
GCR_cBin5772_Ctg1_84	A	63	0.984375	0.000236511	0.0153789
GCR_cBin5772_Ctg1_84	G	1	0.015625	0.000236511	0.0153789
ESTNV_30491_362	A	49	0.765625	0.00292206	0.0540561
ESTNV_30491_362	G	15	0.234375	0.00292206	0.0540561
ESTNV_16613_137	A	1	0.015625	0.000236511	0.0153789
ESTNV_16613_137	G	63	0.984375	0.000236511	0.0153789
ESTNV_13258_439	A	1	0.015625	0.000236511	0.0153789
ESTNV_13258_439	C	63	0.984375	0.000236511	0.0153789
GCR_cBin44221_Ctg1_78	G	64	1	0	0
ESTNV_26616_500	A	6	0.09375	0.00119019	0.0344991
ESTNV_26616_500	G	58	0.90625	0.00119019	0.0344991
ESTNV_31519_569	A	7	0.109375	0.00133514	0.0365396
ESTNV_31519_569	G	57	0.890625	0.00133514	0.0365396
ESTNV_31661_274	G	64	1	0	0
ESTV_14738_303	A	40	0.625	0.00292969	0.0541266
ESTV_14738_303	G	24	0.375	0.00292969	0.0541266
ESTV_13534_158	C	30	0.46875	0.00289917	0.0538439
ESTV_13534_158	G	34	0.53125	0.00289917	0.0538439
GCR_cBin34971_Ctg1_240	A	21	0.328125	0.00322723	0.0568087
GCR_cBin34971_Ctg1_240	C	43	0.671875	0.00322723	0.0568087
ESTNV_28965_1177	A	38	0.59375	0.00363159	0.0602627
ESTNV_28965_1177	C	26	0.40625	0.00363159	0.0602627
GCR_cBin34971_Ctg1_217	A	43	0.671875	0.00322723	0.0568087
GCR_cBin34971_Ctg1_217	G	21	0.328125	0.00322723	0.0568087
GCR_cBin16135_Ctg1_203	A	26	0.40625	0.00411987	0.0641862
GCR_cBin16135_Ctg1_203	T	38	0.59375	0.00411987	0.0641862
GCR_cBin12267_Ctg1_160	A	44	0.6875	0.00231934	0.0481595
GCR_cBin12267_Ctg1_160	G	20	0.3125	0.00231934	0.0481595
GCR_cBin12267_Ctg1_307	A	31	0.484375	0.00218964	0.0467935
GCR_cBin12267_Ctg1_307	C	33	0.515625	0.00218964	0.0467935
GCR_cBin25322_Ctg1_126	A	31	0.484375	0.00218964	0.0467935
GCR_cBin25322_Ctg1_126	G	33	0.515625	0.00218964	0.0467935
ESTNV_32152_893	A	63	0.984375	0.000236511	0.0153789
ESTNV_32152_893	G	1	0.015625	0.000236511	0.0153789
GCR_cBin34913_Ctg1_140	A	9	0.140625	0.00157928	0.0397402
GCR_cBin34913_Ctg1_140	T	55	0.859375	0.00157928	0.0397402
GCR_cBin34913_Ctg1_142	A	9	0.140625	0.00157928	0.0397402
GCR_cBin34913_Ctg1_142	G	55	0.859375	0.00157928	0.0397402
GCR_cBin34172_Ctg1_109	A	24	0.375	0.00341797	0.0584634
GCR_cBin34172_Ctg1_109	C	40	0.625	0.00341797	0.0584634
GCR_cBin25879_Ctg1_163	A	28	0.4375	0.00427246	0.0653641
GCR_cBin25879_Ctg1_163	C	36	0.5625	0.00427246	0.0653641
GCR_cBin30260_Ctg1_67	A	26	0.40625	0.00363159	0.0602627
GCR_cBin30260_Ctg1_67	C	38	0.59375	0.00363159	0.0602627
BASS12_B7_B06_623	A	6	0.09375	0.00119019	0.0344991
BASS12_B7_B06_623	C	58	0.90625	0.00119019	0.0344991
BASS12_B7_B06_1050	A	6	0.09375	0.00119019	0.0344991
BASS12_B7_B06_1050	G	58	0.90625	0.00119019	0.0344991
ESTNV_31974_783	A	61	0.953125	0.000663757	0.0257635
ESTNV_31974_783	C	3	0.046875	0.000663757	0.0257635
ESTNV_32253_402	A	2	0.03125	0.000457764	0.0213954
ESTNV_32253_402	C	62	0.96875	0.000457764	0.0213954
ESTNV_33590_151	C	62	0.96875	0.000457764	0.0213954
ESTNV_33590_151	G	2	0.03125	0.000457764	0.0213954
GCR_cBin6568_Ctg1_186	A	50	0.78125	0.00241089	0.0491008
GCR_cBin6568_Ctg1_186	C	14	0.21875	0.00241089	0.0491008
GCR_cBin13876_Ctg1_149	A	61	0.953125	0.000663757	0.0257635
GCR_cBin13876_Ctg1_149	G	3	0.046875	0.000663757	0.0257635
ESTNV_34575_1979	A	3	0.046875	0.000663757	0.0257635
ESTNV_34575_1979	G	61	0.953125	0.000663757	0.0257635
ESTNV_35937_1368	A	62	0.96875	0.000457764	0.0213954
ESTNV_35937_1368	G	2	0.03125	0.000457764	0.0213954
GCR_cBin8095_Ctg1_103	A	64	1	0	0
ESTNV_35094_1383	A	64	1	0	0
GCR_cBin4931_Ctg1_21	A	64	1	0	0
ESTNV_35536_1238	A	24	0.375	0.00390625	0.0625
ESTNV_35536_1238	G	40	0.625	0.00390625	0.0625
ESTNV_26812_369	A	61	0.953125	0.000663757	0.0257635
ESTNV_26812_369	C	3	0.046875	0.000663757	0.0257635
GCR_cBin33361_Ctg1_258	G	64	1	0	0
GCR_cBin5954_Ctg2_568	A	21	0.328125	0.0042038	0.0648367
GCR_cBin5954_Ctg2_568	G	43	0.671875	0.0042038	0.0648367
ESTV_17458_1031	A	64	1	0	0
ESTNV_26812_629	C	48	0.75	0.00292969	0.0541266
ESTNV_26812_629	G	16	0.25	0.00292969	0.0541266
GCR_cBin8426_Ctg1_154	A	64	1	0	0
GCR_cBin8426_Ctg1_200	C	64	1	0	0
GCR_cBin22215_Ctg1_184	G	64	1	0	0
GCR_cBin25891_Ctg1_305	A	48	0.75	0.00244141	0.0494106
GCR_cBin25891_Ctg1_305	C	16	0.25	0.00244141	0.0494106
GCR_cBin10801_Ctg1_300	A	56	0.875	0.00146484	0.0382733
GCR_cBin10801_Ctg1_300	T	8	0.125	0.00146484	0.0382733
ESTNV_32268_419	A	1	0.015625	0.000236511	0.0153789
ESTNV_32268_419	G	63	0.984375	0.000236511	0.0153789
ESTNV_28460_586	A	32	0.5	0.00439453	0.0662913
ESTNV_28460_586	T	32	0.5	0.00439453	0.0662913
GCR_cBin7903_Ctg1_574	A	6	0.09375	0.00119019	0.0344991
GCR_cBin7903_Ctg1_574	C	58	0.90625	0.00119019	0.0344991
ESTNV_37373_1395	A	10	0.15625	0.00167847	0.0409691
ESTNV_37373_1395	G	54	0.84375	0.00167847	0.0409691
ESTNV_30312_1019	C	3	0.046875	0.000663757	0.0257635
ESTNV_30312_1019	G	61	0.953125	0.000663757	0.0257635
ESTNV_37123_898	A	52	0.8125	0.00231934	0.0481595
ESTNV_37123_898	G	12	0.1875	0.00231934	0.0481595
ESTNV_19653_283	G	64	1	0	0
ESTNV_37153_794	A	61	0.953125	0.000663757	0.0257635
ESTNV_37153_794	G	3	0.046875	0.000663757	0.0257635
ESTNV_19668_192	C	57	0.890625	0.00133514	0.0365396
ESTNV_19668_192	G	7	0.109375	0.00133514	0.0365396
GCR_cBin41593_Ctg1_194	A	6	0.09375	0.00119019	0.0344991
GCR_cBin41593_Ctg1_194	C	58	0.90625	0.00119019	0.0344991
GCR_cBin25388_Ctg1_108	A	49	0.765625	0.0019455	0.0441078
GCR_cBin25388_Ctg1_108	C	15	0.234375	0.0019455	0.0441078
GCR_cBin25388_Ctg1_170	A	49	0.765625	0.0019455	0.0441078
GCR_cBin25388_Ctg1_170	T	15	0.234375	0.0019455	0.0441078
ESTNV_33983_368	A	33	0.515625	0.0056076	0.0748839
ESTNV_33983_368	G	31	0.484375	0.0056076	0.0748839
ESTNV_33983_223	G	64	1	0	0
ESTV_15373_465	G	64	1	0	0
ESTV_20583_309	G	64	1	0	0
ESTNV_37479_1245	A	64	1	0	0
ESTNV_36072_124	G	64	1	0	0
ESTNV_30452_1210	A	58	0.90625	0.00119019	0.0344991
ESTNV_30452_1210	C	6	0.09375	0.00119019	0.0344991
ESTNV_36704_1199	A	45	0.703125	0.00383759	0.0619482
ESTNV_36704_1199	G	19	0.296875	0.00383759	0.0619482
GCR_cBin15414_Ctg1_275	A	18	0.28125	0.00387573	0.0622554
GCR_cBin15414_Ctg1_275	G	46	0.71875	0.00387573	0.0622554
ESTV_21022_166	A	18	0.28125	0.00387573	0.0622554
ESTV_21022_166	C	46	0.71875	0.00387573	0.0622554
GCR_cBin16057_Ctg1_166	A	39	0.609375	0.00377655	0.0614536
GCR_cBin16057_Ctg1_166	G	25	0.390625	0.00377655	0.0614536
GCR_cBin16057_Ctg1_199	A	39	0.609375	0.00377655	0.0614536
GCR_cBin16057_Ctg1_199	G	25	0.390625	0.00377655	0.0614536
GCR_cBin531_Ctg1_115	A	64	1	0	0
GCR_cBin36646_Ctg1_99	A	36	0.5625	0.0032959	0.0574099
GCR_cBin36646_Ctg1_99	C	28	0.4375	0.0032959	0.0574099
GCR_cBin43234_Ctg1_170	A	28	0.4375	0.0032959	0.0574099
GCR_cBin43234_Ctg1_170	G	36	0.5625	0.0032959	0.0574099
GCR_cBin36646_Ctg1_106	A	28	0.4375	0.0032959	0.0574099
GCR_cBin36646_Ctg1_106	T	36	0.5625	0.0032959	0.0574099
GCR_cBin8483_Ctg1_179	A	63	0.984375	0.000236511	0.0153789
GCR_cBin8483_Ctg1_179	G	1	0.015625	0.000236511	0.0153789
GCR_cBin8483_Ctg1_168	A	1	0.015625	0.000236511	0.0153789
GCR_cBin8483_Ctg1_168	C	63	0.984375	0.000236511	0.0153789
GCR_cBin36902_Ctg1_70	A	28	0.4375	0.0032959	0.0574099
GCR_cBin36902_Ctg1_70	T	36	0.5625	0.0032959	0.0574099
GCR_cBin22155_Ctg1_66	A	36	0.5625	0.00231934	0.0481595
GCR_cBin22155_Ctg1_66	G	28	0.4375	0.00231934	0.0481595
GCR_cBin22155_Ctg1_21	A	34	0.548387	0.00226578	0.0476003
GCR_cBin22155_Ctg1_21	G	28	0.451613	0.00226578	0.0476003
ESTV_21093_430	A	15	0.234375	0.0019455	0.0441078
ESTV_21093_430	G	49	0.765625	0.0019455	0.0441078
GCR_cBin4378_Ctg1_115	A	31	0.484375	0.0056076	0.0748839
GCR_cBin4378_Ctg1_115	G	33	0.515625	0.0056076	0.0748839
GCR_cBin15199_Ctg1_186	A	5	0.078125	0.00102997	0.0320931
GCR_cBin15199_Ctg1_186	G	59	0.921875	0.00102997	0.0320931
ESTNV_32124_500	A	32	0.5	0.00390625	0.0625
ESTNV_32124_500	G	32	0.5	0.00390625	0.0625
ESTNV_36871_194	C	47	0.734375	0.00292206	0.0540561
ESTNV_36871_194	G	17	0.265625	0.00292206	0.0540561
GCR_cBin17984_Ctg1_90	A	17	0.265625	0.00243378	0.0493333
GCR_cBin17984_Ctg1_90	G	47	0.734375	0.00243378	0.0493333
ESTNV_36871_453	A	64	1	0	0
ESTNV_36871_663	A	64	1	0	0
ESTV_10747_366	A	28	0.4375	0.00427246	0.0653641
ESTV_10747_366	G	36	0.5625	0.00427246	0.0653641
ESTNV_31289_1032	A	64	1	0	0
ESTNV_35334_747	A	61	0.953125	0.000663757	0.0257635
ESTNV_35334_747	C	3	0.046875	0.000663757	0.0257635
ESTNV_35334_1410	A	61	0.953125	0.000663757	0.0257635
ESTNV_35334_1410	G	3	0.046875	0.000663757	0.0257635
ESTNV_19071_457	C	64	1	0	0
ESTNV_29283_367	A	63	0.984375	0.000236511	0.0153789
ESTNV_29283_367	G	1	0.015625	0.000236511	0.0153789
GCR_cBin11404_Ctg1_50	C	14	0.21875	0.00192261	0.0438475
GCR_cBin11404_Ctg1_50	G	50	0.78125	0.00192261	0.0438475
ESTNV_22983_475	A	33	0.515625	0.00365448	0.0604523
ESTNV_22983_475	T	31	0.484375	0.00365448	0.0604523
GCR_cBin9116_Ctg1_146	A	64	1	0	0
GCR_cBin9116_Ctg1_67	C	64	1	0	0
GCR_cBin30245_Ctg1_84	A	64	1	0	0
ESTNV_35215_1505	A	27	0.421875	0.00347137	0.0589184
ESTNV_35215_1505	G	37	0.578125	0.00347137	0.0589184
GCR_cBin780_Ctg1_144	A	60	0.9375	0.000854492	0.0292317
GCR_cBin780_Ctg1_144	G	4	0.0625	0.000854492	0.0292317
ESTNV_29224_109	A	60	0.9375	0.000854492	0.0292317
ESTNV_29224_109	G	4	0.0625	0.000854492	0.0292317
GCR_cBin17160_Ctg1_108	A	62	0.96875	0.000457764	0.0213954
GCR_cBin17160_Ctg1_108	G	2	0.03125	0.000457764	0.0213954
GCR_cBin2785_Ctg1_206	C	62	0.96875	0.000457764	0.0213954
GCR_cBin2785_Ctg1_206	G	2	0.03125	0.000457764	0.0213954
GCR_cBin20352_Ctg1_163	A	47	0.734375	0.00292206	0.0540561
GCR_cBin20352_Ctg1_163	G	17	0.265625	0.00292206	0.0540561
ESTV_16907_342	A	21	0.328125	0.00273895	0.052335
ESTV_16907_342	G	43	0.671875	0.00273895	0.052335
GCR_cBin9323_Ctg1_78	A	21	0.328125	0.00273895	0.052335
GCR_cBin9323_Ctg1_78	C	43	0.671875	0.00273895	0.052335
GCR_cBin49299_Ctg1_186	A	61	0.953125	0.000663757	0.0257635
GCR_cBin49299_Ctg1_186	G	3	0.046875	0.000663757	0.0257635
ESTNV_32102_56	A	36	0.5625	0.0032959	0.0574099
ESTNV_32102_56	G	28	0.4375	0.0032959	0.0574099
ESTV_20256_233	A	64	1	0	0
ESTV_20256_375	A	64	1	0	0
ESTNV_36130_3412	C	64	1	0	0
ESTNV_31896_140	A	21	0.328125	0.0042038	0.0648367
ESTNV_31896_140	C	43	0.671875	0.0042038	0.0648367
ESTNV_31896_408	A	35	0.546875	0.00408173	0.0638884
ESTNV_31896_408	G	29	0.453125	0.00408173	0.0638884
GCR_cBin15418_Ctg1_123	G	64	1	0	0
ESTNV_24505_142	C	64	1	0	0
ESTNV_36717_1690	G	64	1	0	0
GCR_cBin38330_Ctg1_135	A	17	0.283333	0.00315741	0.0561908
GCR_cBin38330_Ctg1_135	C	43	0.716667	0.00315741	0.0561908
GCR_cBin332_Ctg1_80	G	64	1	0	0
ESTNV_35205_1428	A	32	0.5	0.00292969	0.0541266
ESTNV_35205_1428	C	32	0.5	0.00292969	0.0541266
ESTNV_25127_174	A	23	0.359375	0.00304413	0.0551736
ESTNV_25127_174	T	41	0.640625	0.00304413	0.0551736
ESTNV_35387_1829	A	55	0.859375	0.00206757	0.0454705
ESTNV_35387_1829	C	9	0.140625	0.00206757	0.0454705
GCR_cBin27124_Ctg1_83	A	32	0.5	0.00292969	0.0541266
GCR_cBin27124_Ctg1_83	C	32	0.5	0.00292969	0.0541266
GCR_cBin48578_Ctg1_194	A	6	0.09375	0.00167847	0.0409691
GCR_cBin48578_Ctg1_194	G	58	0.90625	0.00167847	0.0409691
GCR_cBin30256_Ctg1_109	A	64	1	0	0
GCR_cBin30256_Ctg1_176	C	64	1	0	0
GCR_cBin30256_Ctg1_74	G	64	1	0	0
GCR_cBin1614_Ctg1_629	A	40	0.625	0.00292969	0.0541266
GCR_cBin1614_Ctg1_629	G	24	0.375	0.00292969	0.0541266
GCR_cBin2536_Ctg1_238	C	33	0.515625	0.0031662	0.056269
GCR_cBin2536_Ctg1_238	G	31	0.484375	0.0031662	0.056269
GCR_cBin1614_Ctg1_237	A	24	0.375	0.00292969	0.0541266
GCR_cBin1614_Ctg1_237	C	40	0.625	0.00292969	0.0541266
GCR_cBin30250_Ctg1_267	A	40	0.625	0.00292969	0.0541266
GCR_cBin30250_Ctg1_267	C	24	0.375	0.00292969	0.0541266
GCR_cBin4787_Ctg1_387	G	64	1	0	0
GCR_cBin33124_Ctg1_35	A	16	0.25	0.00292969	0.0541266
GCR_cBin33124_Ctg1_35	G	48	0.75	0.00292969	0.0541266
ESTNV_35077_1676	G	64	1	0	0
GCR_cBin8585_Ctg1_77	A	3	0.046875	0.000663757	0.0257635
GCR_cBin8585_Ctg1_77	G	61	0.953125	0.000663757	0.0257635
ESTNV_30121_652	G	64	1	0	0
ESTV_21970_586	A	29	0.453125	0.00310516	0.055724
ESTV_21970_586	C	35	0.546875	0.00310516	0.055724
GCR_cBin42759_Ctg1_238	A	61	0.953125	0.000663757	0.0257635
GCR_cBin42759_Ctg1_238	G	3	0.046875	0.000663757	0.0257635
GCR_cBin30179_Ctg1_191	A	11	0.171875	0.00225067	0.0474412
GCR_cBin30179_Ctg1_191	T	53	0.828125	0.00225067	0.0474412
ESTV_12578_95	A	50	0.78125	0.00289917	0.0538439
ESTV_12578_95	C	14	0.21875	0.00289917	0.0538439
GCR_cBin8424_Ctg1_31	A	55	0.859375	0.00157928	0.0397402
GCR_cBin8424_Ctg1_31	C	9	0.140625	0.00157928	0.0397402
ESTNV_26787_1038	A	62	0.96875	0.000457764	0.0213954
ESTNV_26787_1038	C	2	0.03125	0.000457764	0.0213954
GCR_cBin3322_Ctg1_167	A	61	0.953125	0.000663757	0.0257635
GCR_cBin3322_Ctg1_167	G	3	0.046875	0.000663757	0.0257635
GCR_cBin3071_Ctg1_51	A	5	0.078125	0.00102997	0.0320931
GCR_cBin3071_Ctg1_51	G	59	0.921875	0.00102997	0.0320931
ESTNV_25443_600	A	61	0.953125	0.000663757	0.0257635
ESTNV_25443_600	G	3	0.046875	0.000663757	0.0257635
GCR_cBin13688_Ctg1_129	A	61	0.953125	0.000663757	0.0257635
GCR_cBin13688_Ctg1_129	G	3	0.046875	0.000663757	0.0257635
GCR_cBin39943_Ctg1_265	G	64	1	0	0
GCR_cBin23202_Ctg1_93	A	46	0.71875	0.00241089	0.0491008
GCR_cBin23202_Ctg1_93	G	18	0.28125	0.00241089	0.0491008
ESTNV_31093_1513	A	18	0.28125	0.00241089	0.0491008
ESTNV_31093_1513	T	46	0.71875	0.00241089	0.0491008
ESTV_13699_319	C	3	0.046875	0.000663757	0.0257635
ESTV_13699_319	G	61	0.953125	0.000663757	0.0257635
ESTNV_28113_144	A	15	0.234375	0.00243378	0.0493333
ESTNV_28113_144	C	49	0.765625	0.00243378	0.0493333
ESTNV_28113_319	A	15	0.234375	0.00243378	0.0493333
ESTNV_28113_319	C	49	0.765625	0.00243378	0.0493333
BASS124_B7_D10_265	A	17	0.265625	0.00292206	0.0540561
BASS124_B7_D10_265	G	47	0.734375	0.00292206	0.0540561
BASS124_B7_D10_722	A	51	0.796875	0.00237274	0.0487108
BASS124_B7_D10_722	C	13	0.203125	0.00237274	0.0487108
GCR_cBin6609_Ctg1_85	A	34	0.53125	0.00436401	0.0660607
GCR_cBin6609_Ctg1_85	C	30	0.46875	0.00436401	0.0660607
GCR_cBin6609_Ctg1_88	A	30	0.46875	0.00436401	0.0660607
GCR_cBin6609_Ctg1_88	G	34	0.53125	0.00436401	0.0660607
ESTNV_36462_1509	G	64	1	0	0
GCR_cBin6609_Ctg1_71	A	50	0.78125	0.00241089	0.0491008
GCR_cBin6609_Ctg1_71	G	14	0.21875	0.00241089	0.0491008
ESTV_15119_356	A	64	1	0	0
ESTV_15119_669	G	64	1	0	0
ESTV_17201_545	A	64	1	0	0
GCR_cBin612_Ctg1_226	A	45	0.75	0.00263889	0.0513701
GCR_cBin612_Ctg1_226	G	15	0.25	0.00263889	0.0513701
GCR_cBin612_Ctg1_112	A	46	0.71875	0.00289917	0.0538439
GCR_cBin612_Ctg1_112	T	18	0.28125	0.00289917	0.0538439
ESTV_17314_458	A	11	0.171875	0.00176239	0.0419808
ESTV_17314_458	G	53	0.828125	0.00176239	0.0419808
ESTNV_33518_1279	A	44	0.6875	0.00231934	0.0481595
ESTNV_33518_1279	G	20	0.3125	0.00231934	0.0481595
ESTV_14711_157	C	44	0.6875	0.00231934	0.0481595
ESTV_14711_157	G	20	0.3125	0.00231934	0.0481595
ESTNV_33256_490	A	13	0.203125	0.00188446	0.0434104
ESTNV_33256_490	C	51	0.796875	0.00188446	0.0434104
ESTNV_35896_536	A	7	0.109375	0.00133514	0.0365396
ESTNV_35896_536	C	57	0.890625	0.00133514	0.0365396
ESTNV_23557_1342	A	57	0.890625	0.00133514	0.0365396
ESTNV_23557_1342	C	7	0.109375	0.00133514	0.0365396
ESTNV_34257_418	A	6	0.09375	0.00119019	0.0344991
ESTNV_34257_418	G	58	0.90625	0.00119019	0.0344991
ESTNV_30607_306	A	14	0.21875	0.00192261	0.0438475
ESTNV_30607_306	C	50	0.78125	0.00192261	0.0438475
ESTV_16586_812	A	64	1	0	0
GCR_cBin959_Ctg1_31	C	60	0.9375	0.000854492	0.0292317
GCR_cBin959_Ctg1_31	G	4	0.0625	0.000854492	0.0292317
GCR_cBin47_Ctg1_552	A	38	0.59375	0.00411987	0.0641862
GCR_cBin47_Ctg1_552	G	26	0.40625	0.00411987	0.0641862
ESTNV_30699_568	A	1	0.015625	0.000236511	0.0153789
ESTNV_30699_568	C	63	0.984375	0.000236511	0.0153789
GCR_cBin10694_Ctg1_368	G	64	1	0	0
ESTNV_35766_1019	A	61	0.953125	0.000663757	0.0257635
ESTNV_35766_1019	T	3	0.046875	0.000663757	0.0257635
ESTNV_35766_1178	A	61	0.953125	0.000663757	0.0257635
ESTNV_35766_1178	G	3	0.046875	0.000663757	0.0257635
ESTNV_16380_81	A	34	0.53125	0.00338745	0.0582018
ESTNV_16380_81	C	30	0.46875	0.00338745	0.0582018
ESTNV_35628_2851	A	2	0.03125	0.000457764	0.0213954
ESTNV_35628_2851	C	62	0.96875	0.000457764	0.0213954
GCR_cBin2723_Ctg1_244	A	3	0.046875	0.000663757	0.0257635
GCR_cBin2723_Ctg1_244	G	61	0.953125	0.000663757	0.0257635
ESTNV_31916_578	A	58	0.90625	0.00119019	0.0344991
ESTNV_31916_578	C	6	0.09375	0.00119019	0.0344991
ESTNV_35628_2366	A	2	0.03125	0.000457764	0.0213954
ESTNV_35628_2366	T	62	0.96875	0.000457764	0.0213954
GCR_cBin41959_Ctg1_48	A	62	0.96875	0.000457764	0.0213954
GCR_cBin41959_Ctg1_48	C	2	0.03125	0.000457764	0.0213954
GCR_cBin31945_Ctg1_172	G	64	1	0	0
GCR_cBin38135_Ctg1_130	T	64	1	0	0
ESTV_18633_368	A	62	0.96875	0.000457764	0.0213954
ESTV_18633_368	G	2	0.03125	0.000457764	0.0213954
ESTNV_33335_64	A	64	1	0	0
GCR_rBin17113_Ctg1_146	A	64	1	0	0
GCR_cBin38782_Ctg1_147	A	56	0.875	0.00195312	0.0441942
GCR_cBin38782_Ctg1_147	G	8	0.125	0.00195312	0.0441942
ESTNV_36893_386	A	64	1	0	0
ESTNV_34577_143	A	52	0.8125	0.00183105	0.0427908
ESTNV_34577_143	C	12	0.1875	0.00183105	0.0427908
ESTNV_33032_67	A	5	0.078125	0.00102997	0.0320931
ESTNV_33032_67	G	59	0.921875	0.00102997	0.0320931
ESTNV_26918_325	A	64	1	0	0
ESTNV_35466_1485	G	64	1	0	0
ESTNV_34644_2797	A	15	0.234375	0.0019455	0.0441078
ESTNV_34644_2797	C	49	0.765625	0.0019455	0.0441078
ESTNV_36457_2447	A	10	0.15625	0.00167847	0.0409691
ESTNV_36457_2447	G	54	0.84375	0.00167847	0.0409691
ESTNV_29707_992	G	64	1	0	0
ESTV_15722_638	A	32	0.5	0.00341797	0.0584634
ESTV_15722_638	G	32	0.5	0.00341797	0.0584634
ESTNV_33266_651	A	43	0.671875	0.00371552	0.060955
ESTNV_33266_651	C	21	0.328125	0.00371552	0.060955
ESTNV_33608_1627	C	2	0.03125	0.000457764	0.0213954
ESTNV_33608_1627	G	62	0.96875	0.000457764	0.0213954
ESTNV_13978_305	A	57	0.890625	0.00133514	0.0365396
ESTNV_13978_305	G	7	0.109375	0.00133514	0.0365396
ESTV_17836_900	A	3	0.046875	0.000663757	0.0257635
ESTV_17836_900	G	61	0.953125	0.000663757	0.0257635
ESTNV_35151_385	C	56	0.875	0.00146484	0.0382733
ESTNV_35151_385	G	8	0.125	0.00146484	0.0382733
ESTNV_32218_633	A	55	0.859375	0.00157928	0.0397402
ESTNV_32218_633	G	9	0.140625	0.00157928	0.0397402
ESTV_20996_116	A	64	1	0	0
GCR_cBin745_Ctg2_456	G	64	1	0	0
GCR_cBin745_Ctg2_344	A	64	1	0	0
GCR_cBin21647_Ctg1_220	A	60	0.9375	0.000854492	0.0292317
GCR_cBin21647_Ctg1_220	T	4	0.0625	0.000854492	0.0292317
GCR_cBin33130_Ctg1_122	A	13	0.203125	0.00237274	0.0487108
GCR_cBin33130_Ctg1_122	G	51	0.796875	0.00237274	0.0487108
GCR_cBin47864_Ctg1_28	A	5	0.078125	0.00102997	0.0320931
GCR_cBin47864_Ctg1_28	C	59	0.921875	0.00102997	0.0320931
GCR_cBin6555_Ctg1_102	C	64	1	0	0
GCR_cBin6555_Ctg1_258	A	2	0.03125	0.000457764	0.0213954
GCR_cBin6555_Ctg1_258	C	62	0.96875	0.000457764	0.0213954
GCR_cBin48426_Ctg1_136	C	64	1	0	0
GCR_cBin30011_Ctg1_172	C	64	1	0	0
ESTNV_30477_550	A	14	0.21875	0.00241089	0.0491008
ESTNV_30477_550	G	50	0.78125	0.00241089	0.0491008
GCR_cBin5951_Ctg1_108	A	6	0.09375	0.00119019	0.0344991
GCR_cBin5951_Ctg1_108	C	58	0.90625	0.00119019	0.0344991
GCR_cBin34041_Ctg1_311	A	52	0.8125	0.00231934	0.0481595
GCR_cBin34041_Ctg1_311	G	12	0.1875	0.00231934	0.0481595
GCR_cBin6674_Ctg1_36	A	6	0.09375	0.00119019	0.0344991
GCR_cBin6674_Ctg1_36	C	58	0.90625	0.00119019	0.0344991
GCR_cBin23470_Ctg1_62	A	5	0.0806452	0.00109093	0.0330293
GCR_cBin23470_Ctg1_62	G	57	0.919355	0.00109093	0.0330293
ESTNV_33867_553	C	64	1	0	0
GCR_cBin19578_Ctg1_70	A	43	0.671875	0.00225067	0.0474412
GCR_cBin19578_Ctg1_70	G	21	0.328125	0.00225067	0.0474412
ESTNV_23914_404	G	64	1	0	0
GCR_cBin42906_Ctg1_128	A	7	0.109375	0.00133514	0.0365396
GCR_cBin42906_Ctg1_128	G	57	0.890625	0.00133514	0.0365396
ESTV_14035_356	A	64	1	0	0
ESTNV_28531_364	G	64	1	0	0
GCR_cBin14760_Ctg1_76	A	26	0.40625	0.00460815	0.0678834
GCR_cBin14760_Ctg1_76	C	38	0.59375	0.00460815	0.0678834
ESTNV_35783_626	G	64	1	0	0
ESTNV_35783_1291	A	4	0.0625	0.000854492	0.0292317
ESTNV_35783_1291	G	60	0.9375	0.000854492	0.0292317
GCR_cBin32172_Ctg1_145	A	58	0.90625	0.00119019	0.0344991
GCR_cBin32172_Ctg1_145	C	6	0.09375	0.00119019	0.0344991
GCR_cBin32172_Ctg1_47	A	6	0.09375	0.00119019	0.0344991
GCR_cBin32172_Ctg1_47	G	58	0.90625	0.00119019	0.0344991
GCR_hBin20109_Ctg1_164	G	64	1	0	0
GCR_cBin4288_Ctg1_82	A	64	1	0	0
GCR_cBin4288_Ctg1_252	G	64	1	0	0
GCR_rBin15703_Ctg1_214	A	15	0.234375	0.00243378	0.0493333
GCR_rBin15703_Ctg1_214	G	49	0.765625	0.00243378	0.0493333
GCR_cBin1659_Ctg1_213	A	49	0.765625	0.00243378	0.0493333
GCR_cBin1659_Ctg1_213	G	15	0.234375	0.00243378	0.0493333
GCR_cBin26421_Ctg1_81	A	26	0.40625	0.00363159	0.0602627
GCR_cBin26421_Ctg1_81	G	38	0.59375	0.00363159	0.0602627
ESTV_20470_501	C	64	1	0	0
GCR_cBin23258_Ctg1_190	A	37	0.578125	0.00493622	0.0702582
GCR_cBin23258_Ctg1_190	C	27	0.421875	0.00493622	0.0702582
GCR_cBin19351_Ctg1_165	A	64	1	0	0
GCR_cBin42451_Ctg1_191	A	58	0.90625	0.00119019	0.0344991
GCR_cBin42451_Ctg1_191	C	6	0.09375	0.00119019	0.0344991
BASS110_B6A_E06_264	A	47	0.734375	0.00341034	0.0583981
BASS110_B6A_E06_264	G	17	0.265625	0.00341034	0.0583981
GCR_cBin10510_Ctg1_197	A	49	0.765625	0.00243378	0.0493333
GCR_cBin10510_Ctg1_197	G	15	0.234375	0.00243378	0.0493333
ESTNV_12902_251	A	10	0.15625	0.00167847	0.0409691
ESTNV_12902_251	G	54	0.84375	0.00167847	0.0409691
ESTNV_36163_936	A	47	0.734375	0.00292206	0.0540561
ESTNV_36163_936	G	17	0.265625	0.00292206	0.0540561
ESTNV_23562_420	A	2	0.03125	0.000457764	0.0213954
ESTNV_23562_420	G	62	0.96875	0.000457764	0.0213954
GCR_cBin21084_Ctg1_69	A	43	0.693548	0.00243362	0.0493317
GCR_cBin21084_Ctg1_69	G	19	0.306452	0.00243362	0.0493317
GCR_cBin27595_Ctg1_103	A	64	1	0	0
GCR_cBin2432_Ctg1_559	A	22	0.34375	0.00363159	0.0602627
GCR_cBin2432_Ctg1_559	G	42	0.65625	0.00363159	0.0602627
GCR_hBin1530_Ctg1_68	A	64	1	0	0
ESTV_17164_89	A	4	0.0625	0.000854492	0.0292317
ESTV_17164_89	G	60	0.9375	0.000854492	0.0292317
ESTNV_32560_1127	A	15	0.234375	0.00243378	0.0493333
ESTNV_32560_1127	G	49	0.765625	0.00243378	0.0493333
ESTNV_29923_186	A	30	0.46875	0.00436401	0.0660607
ESTNV_29923_186	G	34	0.53125	0.00436401	0.0660607
GCR_cBin6775_Ctg1_75	A	64	1	0	0
GCR_cBin26628_Ctg1_243	A	14	0.21875	0.00241089	0.0491008
GCR_cBin26628_Ctg1_243	C	50	0.78125	0.00241089	0.0491008
GCR_cBin1711_Ctg1_654	A	26	0.40625	0.00314331	0.0560652
GCR_cBin1711_Ctg1_654	G	38	0.59375	0.00314331	0.0560652
GCR_cBin19737_Ctg1_226	A	26	0.40625	0.00314331	0.0560652
GCR_cBin19737_Ctg1_226	G	38	0.59375	0.00314331	0.0560652
GCR_cBin19737_Ctg1_139	A	26	0.40625	0.00314331	0.0560652
GCR_cBin19737_Ctg1_139	C	38	0.59375	0.00314331	0.0560652
GCR_cBin21489_Ctg1_370	A	35	0.546875	0.00408173	0.0638884
GCR_cBin21489_Ctg1_370	G	29	0.453125	0.00408173	0.0638884
GCR_cBin3741_Ctg1_126	C	25	0.390625	0.00328827	0.0573434
GCR_cBin3741_Ctg1_126	G	39	0.609375	0.00328827	0.0573434
ESTNV_25641_253	A	46	0.71875	0.00338745	0.0582018
ESTNV_25641_253	C	18	0.28125	0.00338745	0.0582018
ESTV_21342_355	A	40	0.625	0.00439453	0.0662913
ESTV_21342_355	G	24	0.375	0.00439453	0.0662913
GCR_cBin37684_Ctg1_55	A	4	0.0625	0.000854492	0.0292317
GCR_cBin37684_Ctg1_55	G	60	0.9375	0.000854492	0.0292317
GCR_cBin31693_Ctg1_74	A	5	0.078125	0.00102997	0.0320931
GCR_cBin31693_Ctg1_74	C	59	0.921875	0.00102997	0.0320931
GCR_cBin31693_Ctg1_166	A	5	0.078125	0.00102997	0.0320931
GCR_cBin31693_Ctg1_166	G	59	0.921875	0.00102997	0.0320931
GCR_cBin37684_Ctg1_202	A	5	0.078125	0.00102997	0.0320931
GCR_cBin37684_Ctg1_202	G	59	0.921875	0.00102997	0.0320931
GCR_cBin25358_Ctg1_191	A	18	0.28125	0.00289917	0.0538439
GCR_cBin25358_Ctg1_191	G	46	0.71875	0.00289917	0.0538439
GCR_cBin28563_Ctg1_122	A	61	0.953125	0.000663757	0.0257635
GCR_cBin28563_Ctg1_122	T	3	0.046875	0.000663757	0.0257635
GCR_cBin49901_Ctg1_37	A	8	0.125	0.00195312	0.0441942
GCR_cBin49901_Ctg1_37	G	56	0.875	0.00195312	0.0441942
ESTNV_18093_348	C	64	1	0	0
GCR_cBin46142_Ctg1_191	A	14	0.21875	0.00338745	0.0582018
GCR_cBin46142_Ctg1_191	G	50	0.78125	0.00338745	0.0582018
ESTNV_32502_411	G	64	1	0	0
ESTNV_28577_526	A	34	0.53125	0.00436401	0.0660607
ESTNV_28577_526	C	30	0.46875	0.00436401	0.0660607
ESTV_16640_186	C	43	0.671875	0.00469208	0.0684987
ESTV_16640_186	G	21	0.328125	0.00469208	0.0684987
BASS138_B7_G02_640	A	55	0.859375	0.00206757	0.0454705
BASS138_B7_G02_640	G	9	0.140625	0.00206757	0.0454705
GCR_hBin50784_Ctg1_70	A	45	0.703125	0.00237274	0.0487108
GCR_hBin50784_Ctg1_70	T	19	0.296875	0.00237274	0.0487108
GCR_cBin5629_Ctg1_134	A	47	0.734375	0.00292206	0.0540561
GCR_cBin5629_Ctg1_134	C	17	0.265625	0.00292206	0.0540561
ESTNV_36561_1246	A	2	0.03125	0.000457764	0.0213954
ESTNV_36561_1246	G	62	0.96875	0.000457764	0.0213954
ESTNV_27729_435	C	64	1	0	0
ESTV_15528_560	C	64	1	0	0
ESTNV_16145_162	A	20	0.3125	0.0032959	0.0574099
ESTNV_16145_162	T	44	0.6875	0.0032959	0.0574099
ESTNV_33367_515	A	17	0.265625	0.00341034	0.0583981
ESTNV_33367_515	C	47	0.734375	0.00341034	0.0583981
GCR_cBin46269_Ctg1_130	G	64	1	0	0
ESTNV_35689_1120	G	64	1	0	0
ESTNV_33988_1757	A	64	1	0	0
ESTNV_33988_762	A	34	0.53125	0.00289917	0.0538439
ESTNV_33988_762	G	30	0.46875	0.00289917	0.0538439
GCR_hBin32294_Ctg1_368	A	64	1	0	0
GCR_cBin3506_Ctg1_309	A	27	0.421875	0.00298309	0.0546177
GCR_cBin3506_Ctg1_309	G	37	0.578125	0.00298309	0.0546177
GCR_cBin21806_Ctg1_79	A	11	0.171875	0.00225067	0.0474412
GCR_cBin21806_Ctg1_79	T	53	0.828125	0.00225067	0.0474412
GCR_cBin32360_Ctg1_288	A	53	0.828125	0.00225067	0.0474412
GCR_cBin32360_Ctg1_288	G	11	0.171875	0.00225067	0.0474412
GCR_cBin3506_Ctg1_149	A	27	0.421875	0.00298309	0.0546177
GCR_cBin3506_Ctg1_149	C	37	0.578125	0.00298309	0.0546177
GCR_cBin15410_Ctg1_212	A	21	0.328125	0.00322723	0.0568087
GCR_cBin15410_Ctg1_212	C	43	0.671875	0.00322723	0.0568087
ESTNV_30819_535	C	64	1	0	0
GCR_cBin13823_Ctg2_368	A	26	0.40625	0.00363159	0.0602627
GCR_cBin13823_Ctg2_368	G	38	0.59375	0.00363159	0.0602627
ESTV_16643_373	A	38	0.59375	0.00216675	0.0465483
ESTV_16643_373	G	26	0.40625	0.00216675	0.0465483
ESTV_16643_586	C	6	0.09375	0.00119019	0.0344991
ESTV_16643_586	G	58	0.90625	0.00119019	0.0344991
ESTV_20925_1105	A	64	1	0	0
ESTNV_36918_790	A	64	1	0	0
ESTNV_32393_853	A	51	0.796875	0.00188446	0.0434104
ESTNV_32393_853	G	13	0.203125	0.00188446	0.0434104
GCR_cBin4742_Ctg1_269	A	62	0.96875	0.000457764	0.0213954
GCR_cBin4742_Ctg1_269	C	2	0.03125	0.000457764	0.0213954
ESTNV_17126_935	A	21	0.328125	0.00322723	0.0568087
ESTNV_17126_935	C	43	0.671875	0.00322723	0.0568087
BASS139_B7_E01_105	A	4	0.0625	0.000854492	0.0292317
BASS139_B7_E01_105	C	60	0.9375	0.000854492	0.0292317
ESTNV_33917_998	A	11	0.171875	0.00225067	0.0474412
ESTNV_33917_998	G	53	0.828125	0.00225067	0.0474412
ESTNV_33917_1292	A	58	0.90625	0.00119019	0.0344991
ESTNV_33917_1292	G	6	0.09375	0.00119019	0.0344991
GCR_cBin15022_Ctg1_318	A	25	0.390625	0.00328827	0.0573434
GCR_cBin15022_Ctg1_318	C	39	0.609375	0.00328827	0.0573434
BASS140_B7_E09_126	C	64	1	0	0
GCR_cBin27107_Ctg1_427	A	64	1	0	0
BASS140_B7_E09_544	A	64	1	0	0
GCR_cBin4279_Ctg1_224	T	64	1	0	0
GCR_cBin28906_Ctg1_149	A	63	0.984375	0.000236511	0.0153789
GCR_cBin28906_Ctg1_149	G	1	0.015625	0.000236511	0.0153789
GCR_cBin42059_Ctg1_20	A	2	0.03125	0.000457764	0.0213954
GCR_cBin42059_Ctg1_20	G	62	0.96875	0.000457764	0.0213954
ESTV_16809_973	A	64	1	0	0
ESTNV_37616_3894	C	64	1	0	0
GCR_cBin9806_Ctg1_249	C	11	0.171875	0.00225067	0.0474412
GCR_cBin9806_Ctg1_249	G	53	0.828125	0.00225067	0.0474412
ESTV_13644_410	A	19	0.296875	0.00237274	0.0487108
ESTV_13644_410	G	45	0.703125	0.00237274	0.0487108
GCR_cBin9103_Ctg1_35	A	2	0.03125	0.000457764	0.0213954
GCR_cBin9103_Ctg1_35	G	62	0.96875	0.000457764	0.0213954
GCR_cBin1541_Ctg1_424	A	2	0.03125	0.000457764	0.0213954
GCR_cBin1541_Ctg1_424	G	62	0.96875	0.000457764	0.0213954
ESTNV_13516_123	A	55	0.859375	0.00157928	0.0397402
ESTNV_13516_123	T	9	0.140625	0.00157928	0.0397402
ESTNV_35567_72	A	38	0.59375	0.00363159	0.0602627
ESTNV_35567_72	G	26	0.40625	0.00363159	0.0602627
ESTNV_28966_1171	A	64	1	0	0
ESTNV_14764_458	A	44	0.6875	0.00280762	0.052987
ESTNV_14764_458	G	20	0.3125	0.00280762	0.052987
ESTNV_32717_1091	C	64	1	0	0
GCR_cBin51398_Ctg1_70	A	17	0.265625	0.00341034	0.0583981
GCR_cBin51398_Ctg1_70	C	47	0.734375	0.00341034	0.0583981
ESTNV_25398_289	A	57	0.890625	0.00182343	0.0427016
ESTNV_25398_289	C	7	0.109375	0.00182343	0.0427016
GCR_cBin36279_Ctg1_64	A	53	0.828125	0.00273895	0.052335
GCR_cBin36279_Ctg1_64	C	11	0.171875	0.00273895	0.052335
ESTNV_29240_385	A	64	1	0	0
GCR_cBin6162_Ctg1_59	C	64	1	0	0
GCR_cBin16401_Ctg1_326	A	64	1	0	0
ESTNV_34931_121	A	60	0.9375	0.000854492	0.0292317
ESTNV_34931_121	C	4	0.0625	0.000854492	0.0292317
GCR_cBin31415_Ctg1_119	A	52	0.8125	0.00183105	0.0427908
GCR_cBin31415_Ctg1_119	T	12	0.1875	0.00183105	0.0427908
GCR_cBin17319_Ctg1_126	C	64	1	0	0
GCR_cBin9564_Ctg1_161	G	64	1	0	0
GCR_cBin9732_Ctg1_64	C	14	0.21875	0.00241089	0.0491008
GCR_cBin9732_Ctg1_64	G	50	0.78125	0.00241089	0.0491008
GCR_cBin35021_Ctg1_70	A	40	0.625	0.00439453	0.0662913
GCR_cBin35021_Ctg1_70	C	24	0.375	0.00439453	0.0662913
GCR_cBin19394_Ctg1_156	A	16	0.25	0.00244141	0.0494106
GCR_cBin19394_Ctg1_156	G	48	0.75	0.00244141	0.0494106
GCR_cBin46118_Ctg1_223	A	64	1	0	0
GCR_cBin41876_Ctg1_108	G	64	1	0	0
GCR_cBin29958_Ctg1_84	A	2	0.03125	0.000457764	0.0213954
GCR_cBin29958_Ctg1_84	G	62	0.96875	0.000457764	0.0213954
ESTV_17539_1123	C	64	1	0	0
GCR_cBin12278_Ctg1_153	A	64	1	0	0
ESTNV_33422_864	A	44	0.6875	0.0032959	0.0574099
ESTNV_33422_864	T	20	0.3125	0.0032959	0.0574099
GCR_cBin15028_Ctg1_199	A	64	1	0	0
ESTV_15187_371	G	64	1	0	0
ESTNV_28503_575	A	64	1	0	0
ESTNV_28503_327	A	64	1	0	0
GCR_cBin9428_Ctg1_32	C	64	1	0	0
ESTNV_36230_1120	A	19	0.296875	0.00432587	0.0657713
ESTNV_36230_1120	G	45	0.703125	0.00432587	0.0657713
ESTV_17202_480	A	62	0.96875	0.000457764	0.0213954
ESTV_17202_480	C	2	0.03125	0.000457764	0.0213954
ESTNV_30258_90	A	64	1	0	0
GCR_cBin37930_Ctg1_88	A	59	0.921875	0.00102997	0.0320931
GCR_cBin37930_Ctg1_88	G	5	0.078125	0.00102997	0.0320931
GCR_cBin7082_Ctg1_204	A	50	0.833333	0.00240741	0.0490653
GCR_cBin7082_Ctg1_204	G	10	0.166667	0.00240741	0.0490653
ESTNV_34419_496	C	39	0.609375	0.00231171	0.0480802
ESTNV_34419_496	G	25	0.390625	0.00231171	0.0480802
ESTNV_34833_1382	A	64	1	0	0
ESTNV_35650_2037	C	64	1	0	0
GCR_cBin19287_Ctg1_252	A	16	0.25	0.00195312	0.0441942
GCR_cBin19287_Ctg1_252	G	48	0.75	0.00195312	0.0441942
ESTNV_35635_2078	A	15	0.234375	0.00243378	0.0493333
ESTNV_35635_2078	C	49	0.765625	0.00243378	0.0493333
GCR_hBin6632_Ctg1_121	A	15	0.234375	0.00292206	0.0540561
GCR_hBin6632_Ctg1_121	C	49	0.765625	0.00292206	0.0540561
BASS112_B7_A12_127	A	64	1	0	0
BASS112_B7_A12_395	G	64	1	0	0
ESTNV_36511_141	A	13	0.203125	0.00188446	0.0434104
ESTNV_36511_141	G	51	0.796875	0.00188446	0.0434104
ESTV_13197_590	A	64	1	0	0
GCR_cBin4805_Ctg1_193	A	62	0.96875	0.000457764	0.0213954
GCR_cBin4805_Ctg1_193	G	2	0.03125	0.000457764	0.0213954
ESTNV_35329_908	C	58	0.90625	0.00119019	0.0344991
ESTNV_35329_908	G	6	0.09375	0.00119019	0.0344991
ESTNV_35352_241	A	47	0.734375	0.00292206	0.0540561
ESTNV_35352_241	G	17	0.265625	0.00292206	0.0540561
ESTNV_35352_77	A	17	0.265625	0.00292206	0.0540561
ESTNV_35352_77	C	47	0.734375	0.00292206	0.0540561
ESTNV_35329_232	A	6	0.09375	0.00119019	0.0344991
ESTNV_35329_232	G	58	0.90625	0.00119019	0.0344991
GCR_cBin2433_Ctg1_97	A	64	1	0	0
ESTV_16979_565	A	37	0.578125	0.00347137	0.0589184
ESTV_16979_565	G	27	0.421875	0.00347137	0.0589184
ESTNV_33016_564	A	64	1	0	0
GCR_cBin568_Ctg1_74	A	63	0.984375	0.000236511	0.0153789
GCR_cBin568_Ctg1_74	C	1	0.015625	0.000236511	0.0153789
GCR_cBin3044_Ctg1_47	C	43	0.671875	0.00371552	0.060955
GCR_cBin3044_Ctg1_47	G	21	0.328125	0.00371552	0.060955
GCR_hBin45092_Ctg1_140	A	18	0.28125	0.00387573	0.0622554
GCR_hBin45092_Ctg1_140	T	46	0.71875	0.00387573	0.0622554
GCR_hBin45092_Ctg1_57	A	61	0.953125	0.000663757	0.0257635
GCR_hBin45092_Ctg1_57	G	3	0.046875	0.000663757	0.0257635
GCR_cBin16144_Ctg1_285	G	64	1	0	0
GCR_cBin17565_Ctg1_349	C	34	0.53125	0.00338745	0.0582018
GCR_cBin17565_Ctg1_349	G	30	0.46875	0.00338745	0.0582018
GCR_cBin17565_Ctg1_401	A	34	0.53125	0.00338745	0.0582018
GCR_cBin17565_Ctg1_401	G	30	0.46875	0.00338745	0.0582018
GCR_cBin1635_Ctg1_70	T	64	1	0	0
ESTNV_34623_1031	A	5	0.078125	0.00102997	0.0320931
ESTNV_34623_1031	G	59	0.921875	0.00102997	0.0320931
GCR_cBin9253_Ctg1_169	A	4	0.0689655	0.00102505	0.0320164
GCR_cBin9253_Ctg1_169	C	54	0.931034	0.00102505	0.0320164
ESTNV_35547_1444	A	4	0.0625	0.000854492	0.0292317
ESTNV_35547_1444	G	60	0.9375	0.000854492	0.0292317
ESTNV_30983_1638	A	19	0.296875	0.00237274	0.0487108
ESTNV_30983_1638	G	45	0.703125	0.00237274	0.0487108
ESTNV_28895_687	C	64	1	0	0
ESTNV_36086_719	C	1	0.015625	0.000236511	0.0153789
ESTNV_36086_719	G	63	0.984375	0.000236511	0.0153789
ESTNV_35503_345	A	62	0.96875	0.000457764	0.0213954
ESTNV_35503_345	G	2	0.03125	0.000457764	0.0213954
ESTNV_35503_827	C	2	0.03125	0.000457764	0.0213954
ESTNV_35503_827	G	62	0.96875	0.000457764	0.0213954
ESTNV_32703_428	A	64	1	0	0
ESTNV_32703_647	A	64	1	0	0
ESTNV_28129_298	A	64	1	0	0
ESTNV_37656_1100	A	59	0.921875	0.00102997	0.0320931
ESTNV_37656_1100	G	5	0.078125	0.00102997	0.0320931
ESTV_21187_191	G	64	1	0	0
ESTV_21697_1223	A	2	0.03125	0.000457764	0.0213954
ESTV_21697_1223	G	62	0.96875	0.000457764	0.0213954
ESTV_21801_199	A	64	1	0	0
ESTNV_22829_341	A	50	0.78125	0.00338745	0.0582018
ESTNV_22829_341	C	14	0.21875	0.00338745	0.0582018
GCR_cBin8515_Ctg1_191	C	64	1	0	0
GCR_cBin40624_Ctg1_148	A	29	0.453125	0.00359344	0.0599453
GCR_cBin40624_Ctg1_148	G	35	0.546875	0.00359344	0.0599453
GCR_cBin33417_Ctg1_101	A	33	0.515625	0.00365448	0.0604523
GCR_cBin33417_Ctg1_101	G	31	0.484375	0.00365448	0.0604523
ESTV_11377_108	A	6	0.09375	0.00119019	0.0344991
ESTV_11377_108	G	58	0.90625	0.00119019	0.0344991
ESTNV_21396_116	A	14	0.21875	0.00338745	0.0582018
ESTNV_21396_116	G	50	0.78125	0.00338745	0.0582018
GCR_cBin41869_Ctg1_110	A	63	0.984375	0.000236511	0.0153789
GCR_cBin41869_Ctg1_110	G	1	0.015625	0.000236511	0.0153789
ESTNV_31747_532	G	64	1	0	0
ESTV_16743_404	G	64	1	0	0
ESTV_20625_51	A	11	0.171875	0.00176239	0.0419808
ESTV_20625_51	C	53	0.828125	0.00176239	0.0419808
ESTNV_20180_573	A	53	0.828125	0.00176239	0.0419808
ESTNV_20180_573	G	11	0.171875	0.00176239	0.0419808
ESTNV_34353_55	A	39	0.609375	0.00328827	0.0573434
ESTNV_34353_55	T	25	0.390625	0.00328827	0.0573434
GCR_cBin6795_Ctg1_308	A	53	0.828125	0.00176239	0.0419808
GCR_cBin6795_Ctg1_308	G	11	0.171875	0.00176239	0.0419808
ESTV_21892_327	C	64	1	0	0
GCR_cBin17748_Ctg1_51	A	22	0.34375	0.00363159	0.0602627
GCR_cBin17748_Ctg1_51	C	42	0.65625	0.00363159	0.0602627
ESTNV_35314_130	C	41	0.640625	0.00402069	0.0634089
ESTNV_35314_130	G	23	0.359375	0.00402069	0.0634089
ESTNV_34464_1404	A	16	0.25	0.00341797	0.0584634
ESTNV_34464_1404	G	48	0.75	0.00341797	0.0584634
GCR_cBin4170_Ctg1_233	A	42	0.724138	0.00332117	0.0576296
GCR_cBin4170_Ctg1_233	C	16	0.275862	0.00332117	0.0576296
GCR_cBin4170_Ctg1_228	A	15	0.25	0.00319444	0.0565194
GCR_cBin4170_Ctg1_228	G	45	0.75	0.00319444	0.0565194
GCR_cBin5339_Ctg1_208	A	43	0.671875	0.00322723	0.0568087
GCR_cBin5339_Ctg1_208	G	21	0.328125	0.00322723	0.0568087
ESTNV_26088_606	C	41	0.640625	0.00206757	0.0454705
ESTNV_26088_606	G	23	0.359375	0.00206757	0.0454705
GCR_cBin16885_Ctg1_348	A	1	0.015625	0.000236511	0.0153789
GCR_cBin16885_Ctg1_348	C	63	0.984375	0.000236511	0.0153789
GCR_cBin24218_Ctg1_261	A	63	0.984375	0.000236511	0.0153789
GCR_cBin24218_Ctg1_261	C	1	0.015625	0.000236511	0.0153789
BASS136_B7_E01_171	G	64	1	0	0
ESTV_12417_100	A	29	0.453125	0.00408173	0.0638884
ESTV_12417_100	G	35	0.546875	0.00408173	0.0638884
GCR_cBin4908_Ctg1_226	A	35	0.546875	0.00408173	0.0638884
GCR_cBin4908_Ctg1_226	G	29	0.453125	0.00408173	0.0638884
GCR_cBin10777_Ctg1_196	A	23	0.359375	0.00353241	0.0594341
GCR_cBin10777_Ctg1_196	G	41	0.640625	0.00353241	0.0594341
ESTV_12417_208	A	29	0.453125	0.00408173	0.0638884
ESTV_12417_208	C	35	0.546875	0.00408173	0.0638884
ESTV_16934_1328	G	64	1	0	0
ESTV_16934_1568	C	64	1	0	0
GCR_cBin13949_Ctg1_125	A	1	0.015625	0.000236511	0.0153789
GCR_cBin13949_Ctg1_125	G	63	0.984375	0.000236511	0.0153789
ESTNV_30017_552	A	8	0.125	0.00146484	0.0382733
ESTNV_30017_552	C	56	0.875	0.00146484	0.0382733
GCR_cBin4585_Ctg1_148	A	33	0.515625	0.00414276	0.0643643
GCR_cBin4585_Ctg1_148	G	31	0.484375	0.00414276	0.0643643
ESTNV_30017_158	A	8	0.125	0.00146484	0.0382733
ESTNV_30017_158	T	56	0.875	0.00146484	0.0382733
GCR_cBin44859_Ctg1_254	A	64	1	0	0
GCR_cBin14217_Ctg1_414	A	57	0.890625	0.00133514	0.0365396
GCR_cBin14217_Ctg1_414	G	7	0.109375	0.00133514	0.0365396
ESTNV_35114_720	T	64	1	0	0
ESTV_15386_484	A	21	0.328125	0.00469208	0.0684987
ESTV_15386_484	G	43	0.671875	0.00469208	0.0684987
GCR_cBin44030_Ctg1_237	A	26	0.40625	0.00363159	0.0602627
GCR_cBin44030_Ctg1_237	G	38	0.59375	0.00363159	0.0602627
GCR_cBin992_Ctg1_309	A	64	1	0	0
GCR_cBin25010_Ctg1_148	A	62	0.96875	0.000457764	0.0213954
GCR_cBin25010_Ctg1_148	T	2	0.03125	0.000457764	0.0213954
GCR_hBin10171_Ctg1_182	C	25	0.390625	0.00377655	0.0614536
GCR_hBin10171_Ctg1_182	G	39	0.609375	0.00377655	0.0614536
GCR_cBin11431_Ctg1_401	A	55	0.859375	0.00206757	0.0454705
GCR_cBin11431_Ctg1_401	G	9	0.140625	0.00206757	0.0454705
ESTNV_25792_446	A	64	1	0	0
ESTNV_25792_698	G	64	1	0	0
ESTNV_23515_266	A	31	0.484375	0.00511932	0.0715494
ESTNV_23515_266	C	33	0.515625	0.00511932	0.0715494
ESTV_15402_87	A	25	0.390625	0.00328827	0.0573434
ESTV_15402_87	T	39	0.609375	0.00328827	0.0573434
ESTNV_25525_410	A	6	0.09375	0.00119019	0.0344991
ESTNV_25525_410	G	58	0.90625	0.00119019	0.0344991
GCR_cBin12379_Ctg1_94	C	24	0.387097	0.0029707	0.0545041
GCR_cBin12379_Ctg1_94	G	38	0.612903	0.0029707	0.0545041
GCR_cBin39590_Ctg1_87	C	27	0.421875	0.00444794	0.0666929
GCR_cBin39590_Ctg1_87	G	37	0.578125	0.00444794	0.0666929
ESTNV_36346_1426	G	64	1	0	0
GCR_cBin29880_Ctg1_23	A	43	0.671875	0.00322723	0.0568087
GCR_cBin29880_Ctg1_23	C	21	0.328125	0.00322723	0.0568087
ESTNV_13974_873	C	58	0.90625	0.00119019	0.0344991
ESTNV_13974_873	G	6	0.09375	0.00119019	0.0344991
GCR_cBin26310_Ctg1_189	A	64	1	0	0
GCR_cBin18612_Ctg1_67	G	64	1	0	0
ESTNV_36358_242	A	64	1	0	0
ESTV_14645_361	A	10	0.15625	0.00167847	0.0409691
ESTV_14645_361	C	54	0.84375	0.00167847	0.0409691
ESTV_14645_221	G	64	1	0	0
ESTNV_31662_122	A	64	1	0	0
GCR_cBin37721_Ctg1_160	G	64	1	0	0
ESTNV_32316_1197	C	15	0.258621	0.00274714	0.0524132
ESTNV_32316_1197	G	43	0.741379	0.00274714	0.0524132
GCR_cBin20050_Ctg1_34	A	57	0.890625	0.00133514	0.0365396
GCR_cBin20050_Ctg1_34	C	7	0.109375	0.00133514	0.0365396
GCR_cBin27614_Ctg1_152	A	52	0.8125	0.00183105	0.0427908
GCR_cBin27614_Ctg1_152	T	12	0.1875	0.00183105	0.0427908
GCR_cBin31420_Ctg1_20	G	64	1	0	0
GCR_cBin7487_Ctg1_102	A	49	0.765625	0.00243378	0.0493333
GCR_cBin7487_Ctg1_102	G	15	0.234375	0.00243378	0.0493333
ESTV_17368_88	A	64	1	0	0
ESTV_14503_197	A	58	0.90625	0.00119019	0.0344991
ESTV_14503_197	C	6	0.09375	0.00119019	0.0344991
ESTNV_34237_82	A	58	0.90625	0.00119019	0.0344991
ESTNV_34237_82	C	6	0.09375	0.00119019	0.0344991
GCR_cBin13024_Ctg1_175	G	64	1	0	0
GCR_cBin13024_Ctg1_142	A	41	0.640625	0.00304413	0.0551736
GCR_cBin13024_Ctg1_142	G	23	0.359375	0.00304413	0.0551736
GCR_cBin13024_Ctg1_140	A	41	0.640625	0.00304413	0.0551736
GCR_cBin13024_Ctg1_140	C	23	0.359375	0.00304413	0.0551736
GCR_cBin34183_Ctg1_158	A	1	0.015625	0.000236511	0.0153789
GCR_cBin34183_Ctg1_158	C	63	0.984375	0.000236511	0.0153789
GCR_cBin34183_Ctg1_159	A	63	0.984375	0.000236511	0.0153789
GCR_cBin34183_Ctg1_159	C	1	0.015625	0.000236511	0.0153789
GCR_cBin42808_Ctg1_202	A	18	0.28125	0.00289917	0.0538439
GCR_cBin42808_Ctg1_202	G	46	0.71875	0.00289917	0.0538439
GCR_cBin6567_Ctg1_114	A	55	0.859375	0.00157928	0.0397402
GCR_cBin6567_Ctg1_114	T	9	0.140625	0.00157928	0.0397402
BASS111_B7_D03_407	C	64	1	0	0
GCR_hBin39311_Ctg1_131	C	58	0.90625	0.00119019	0.0344991
GCR_hBin39311_Ctg1_131	G	6	0.09375	0.00119019	0.0344991
ESTNV_36502_836	A	33	0.515625	0.00365448	0.0604523
ESTNV_36502_836	G	31	0.484375	0.00365448	0.0604523
BASS111_B7_D03_286	A	19	0.296875	0.00383759	0.0619482
BASS111_B7_D03_286	C	45	0.703125	0.00383759	0.0619482
BASS111_B7_D03_328	A	19	0.296875	0.00383759	0.0619482
BASS111_B7_D03_328	G	45	0.703125	0.00383759	0.0619482
GCR_hBin33430_Ctg1_182	G	64	1	0	0
GCR_cBin30182_Ctg1_141	A	59	0.921875	0.00102997	0.0320931
GCR_cBin30182_Ctg1_141	T	5	0.078125	0.00102997	0.0320931
ESTV_21750_731	A	56	0.903226	0.00125877	0.0354791
ESTV_21750_731	T	6	0.0967742	0.00125877	0.0354791
ESTNV_35044_125	A	5	0.078125	0.00102997	0.0320931
ESTNV_35044_125	G	59	0.921875	0.00102997	0.0320931
GCR_cBin17727_Ctg1_27	G	64	1	0	0
ESTV_15078_479	A	50	0.78125	0.00241089	0.0491008
ESTV_15078_479	C	14	0.21875	0.00241089	0.0491008
ESTV_15770_410	G	64	1	0	0
GCR_cBin20239_Ctg1_63	A	32	0.5	0.00341797	0.0584634
GCR_cBin20239_Ctg1_63	G	32	0.5	0.00341797	0.0584634
GCR_cBin19361_Ctg1_96	A	46	0.71875	0.00241089	0.0491008
GCR_cBin19361_Ctg1_96	C	18	0.28125	0.00241089	0.0491008
ESTNV_20218_62	A	20	0.3125	0.00280762	0.052987
ESTNV_20218_62	G	44	0.6875	0.00280762	0.052987
GCR_cBin37707_Ctg1_102	A	25	0.390625	0.00328827	0.0573434
GCR_cBin37707_Ctg1_102	G	39	0.609375	0.00328827	0.0573434
ESTNV_35887_1036	C	64	1	0	0
GCR_cBin13496_Ctg1_388	A	37	0.596774	0.00386023	0.0621307
GCR_cBin13496_Ctg1_388	G	25	0.403226	0.00386023	0.0621307
GCR_cBin6985_Ctg1_265	G	64	1	0	0
GCR_cBin5116_Ctg1_343	A	60	0.9375	0.000854492	0.0292317
GCR_cBin5116_Ctg1_343	C	4	0.0625	0.000854492	0.0292317
ESTNV_31531_916	A	52	0.8125	0.00231934	0.0481595
ESTNV_31531_916	G	12	0.1875	0.00231934	0.0481595
ESTV_18386_118	A	64	1	0	0
ESTV_18386_82	C	64	1	0	0
GCR_cBin4421_Ctg1_345	A	61	0.953125	0.000663757	0.0257635
GCR_cBin4421_Ctg1_345	G	3	0.046875	0.000663757	0.0257635
GCR_cBin4421_Ctg1_196	A	3	0.046875	0.000663757	0.0257635
GCR_cBin4421_Ctg1_196	C	61	0.953125	0.000663757	0.0257635
GCR_cBin33212_Ctg1_226	A	39	0.609375	0.00524139	0.0723975
GCR_cBin33212_Ctg1_226	C	25	0.390625	0.00524139	0.0723975
ESTNV_35525_1387	A	32	0.5	0.00390625	0.0625
ESTNV_35525_1387	G	32	0.5	0.00390625	0.0625
GCR_cBin793_Ctg1_69	A	22	0.34375	0.00411987	0.0641862
GCR_cBin793_Ctg1_69	G	42	0.65625	0.00411987	0.0641862
ESTNV_19126_343	A	11	0.171875	0.00225067	0.0474412
ESTNV_19126_343	G	53	0.828125	0.00225067	0.0474412
ESTNV_19750_154	C	64	1	0	0
ESTV_16188_156	A	62	0.96875	0.000457764	0.0213954
ESTV_16188_156	G	2	0.03125	0.000457764	0.0213954
ESTNV_33045_743	C	10	0.15625	0.00167847	0.0409691
ESTNV_33045_743	G	54	0.84375	0.00167847	0.0409691
ESTV_16466_1044	A	64	1	0	0
ESTNV_22986_1059	A	22	0.34375	0.00363159	0.0602627
ESTNV_22986_1059	G	42	0.65625	0.00363159	0.0602627
ESTV_16965_617	G	64	1	0	0
ESTNV_24241_102	A	14	0.21875	0.00289917	0.0538439
ESTNV_24241_102	C	50	0.78125	0.00289917	0.0538439
GCR_hBin16599_Ctg1_79	A	15	0.234375	0.0019455	0.0441078
GCR_hBin16599_Ctg1_79	C	49	0.765625	0.0019455	0.0441078
ESTV_16604_550	A	29	0.453125	0.00359344	0.0599453
ESTV_16604_550	C	35	0.546875	0.00359344	0.0599453
GCR_cBin6090_Ctg1_166	C	62	0.96875	0.000457764	0.0213954
GCR_cBin6090_Ctg1_166	G	2	0.03125	0.000457764	0.0213954
ESTNV_14000_405	A	5	0.078125	0.00102997	0.0320931
ESTNV_14000_405	G	59	0.921875	0.00102997	0.0320931
GCR_cBin965_Ctg2_341	A	64	1	0	0
GCR_cBin965_Ctg2_356	C	64	1	0	0
ESTNV_14089_241	A	64	1	0	0
ESTNV_29295_468	A	42	0.65625	0.00460815	0.0678834
ESTNV_29295_468	C	22	0.34375	0.00460815	0.0678834
ESTV_13454_78	A	35	0.546875	0.00457001	0.0676018
ESTV_13454_78	C	29	0.453125	0.00457001	0.0676018
ESTNV_30013_731	A	40	0.625	0.00439453	0.0662913
ESTNV_30013_731	C	24	0.375	0.00439453	0.0662913
GCR_cBin2972_Ctg1_58	A	39	0.609375	0.00426483	0.0653057
GCR_cBin2972_Ctg1_58	G	25	0.390625	0.00426483	0.0653057
ESTV_14757_562	A	54	0.84375	0.00167847	0.0409691
ESTV_14757_562	G	10	0.15625	0.00167847	0.0409691
ESTNV_33128_78	A	14	0.21875	0.00289917	0.0538439
ESTNV_33128_78	C	50	0.78125	0.00289917	0.0538439
ESTV_14757_521	A	23	0.359375	0.00450897	0.0671489
ESTV_14757_521	G	41	0.640625	0.00450897	0.0671489
ESTNV_33128_565	A	50	0.78125	0.00289917	0.0538439
ESTNV_33128_565	G	14	0.21875	0.00289917	0.0538439
BASS123_B7_B04_360	G	64	1	0	0
ESTV_10850_97	A	47	0.734375	0.00292206	0.0540561
ESTV_10850_97	C	17	0.265625	0.00292206	0.0540561
ESTNV_23683_596	A	17	0.265625	0.00292206	0.0540561
ESTNV_23683_596	T	47	0.734375	0.00292206	0.0540561
GCR_cBin30866_Ctg1_113	A	4	0.0625	0.000854492	0.0292317
GCR_cBin30866_Ctg1_113	C	60	0.9375	0.000854492	0.0292317
ESTNV_37477_1100	G	64	1	0	0
GCR_cBin6066_Ctg1_86	A	15	0.234375	0.00292206	0.0540561
GCR_cBin6066_Ctg1_86	C	49	0.765625	0.00292206	0.0540561
ESTNV_37607_394	C	17	0.265625	0.00292206	0.0540561
ESTNV_37607_394	G	47	0.734375	0.00292206	0.0540561
GCR_cBin37571_Ctg1_142	A	57	0.890625	0.00182343	0.0427016
GCR_cBin37571_Ctg1_142	G	7	0.109375	0.00182343	0.0427016
GCR_hBin31975_Ctg1_231	A	7	0.109375	0.00182343	0.0427016
GCR_hBin31975_Ctg1_231	G	57	0.890625	0.00182343	0.0427016
GCR_cBin4660_Ctg1_268	A	2	0.03125	0.000457764	0.0213954
GCR_cBin4660_Ctg1_268	G	62	0.96875	0.000457764	0.0213954
GCR_cBin12244_Ctg1_232	A	23	0.359375	0.00499725	0.0706913
GCR_cBin12244_Ctg1_232	T	41	0.640625	0.00499725	0.0706913
GCR_cBin26088_Ctg1_476	A	12	0.1875	0.00280762	0.052987
GCR_cBin26088_Ctg1_476	C	52	0.8125	0.00280762	0.052987
GCR_cBin11191_Ctg1_173	A	28	0.4375	0.00427246	0.0653641
GCR_cBin11191_Ctg1_173	G	36	0.5625	0.00427246	0.0653641
GCR_cBin5159_Ctg1_408	A	28	0.4375	0.00427246	0.0653641
GCR_cBin5159_Ctg1_408	C	36	0.5625	0.00427246	0.0653641
GCR_cBin5806_Ctg1_138	G	64	1	0	0
GCR_cBin5806_Ctg1_204	C	64	1	0	0
GCR_cBin5159_Ctg1_487	A	39	0.609375	0.00475311	0.0689428
GCR_cBin5159_Ctg1_487	G	25	0.390625	0.00475311	0.0689428
GCR_cBin27882_Ctg1_69	A	59	0.921875	0.00102997	0.0320931
GCR_cBin27882_Ctg1_69	C	5	0.078125	0.00102997	0.0320931
GCR_cBin33065_Ctg1_159	A	38	0.59375	0.00314331	0.0560652
GCR_cBin33065_Ctg1_159	G	26	0.40625	0.00314331	0.0560652
GCR_cBin27882_Ctg1_116	A	42	0.65625	0.00411987	0.0641862
GCR_cBin27882_Ctg1_116	C	22	0.34375	0.00411987	0.0641862
GCR_cBin715_Ctg1_93	C	64	1	0	0
ESTNV_32731_625	A	58	0.90625	0.00119019	0.0344991
ESTNV_32731_625	T	6	0.09375	0.00119019	0.0344991
BASS138_B7_B10_378	G	64	1	0	0
BASS15_B7_A08_510	A	11	0.171875	0.00225067	0.0474412
BASS15_B7_A08_510	T	53	0.828125	0.00225067	0.0474412
BASS138_B7_B10_225	A	7	0.109375	0.00133514	0.0365396
BASS138_B7_B10_225	T	57	0.890625	0.00133514	0.0365396
BASS138_B7_B10_200	A	7	0.109375	0.00133514	0.0365396
BASS138_B7_B10_200	C	57	0.890625	0.00133514	0.0365396
GCR_cBin48196_Ctg1_36	A	62	0.96875	0.000457764	0.0213954
GCR_cBin48196_Ctg1_36	G	2	0.03125	0.000457764	0.0213954
GCR_cBin48196_Ctg1_63	A	62	0.96875	0.000457764	0.0213954
GCR_cBin48196_Ctg1_63	T	2	0.03125	0.000457764	0.0213954
GCR_cBin15004_Ctg1_309	A	39	0.609375	0.00475311	0.0689428
GCR_cBin15004_Ctg1_309	G	25	0.390625	0.00475311	0.0689428
GCR_cBin15004_Ctg1_154	A	25	0.390625	0.00475311	0.0689428
GCR_cBin15004_Ctg1_154	C	39	0.609375	0.00475311	0.0689428
GCR_cBin10002_Ctg1_178	A	64	1	0	0
ESTNV_29033_400	C	64	1	0	0
ESTV_14722_480	G	64	1	0	0
ESTV_16691_375	A	19	0.296875	0.0033493	0.0578732
ESTV_16691_375	C	45	0.703125	0.0033493	0.0578732
ESTNV_37022_1170	C	45	0.703125	0.0033493	0.0578732
ESTNV_37022_1170	G	19	0.296875	0.0033493	0.0578732
GCR_cBin29826_Ctg1_167	C	64	1	0	0
GCR_cBin26631_Ctg1_386	G	64	1	0	0
ESTNV_33546_190	C	27	0.421875	0.00298309	0.0546177
ESTNV_33546_190	G	37	0.578125	0.00298309	0.0546177
ESTV_18022_968	A	15	0.234375	0.00292206	0.0540561
ESTV_18022_968	C	49	0.765625	0.00292206	0.0540561
GCR_cBin33117_Ctg1_151	A	33	0.515625	0.0031662	0.056269
GCR_cBin33117_Ctg1_151	G	31	0.484375	0.0031662	0.056269
ESTNV_37221_2328	A	7	0.109375	0.00182343	0.0427016
ESTNV_37221_2328	G	57	0.890625	0.00182343	0.0427016
ESTV_20832_153	A	57	0.890625	0.00182343	0.0427016
ESTV_20832_153	T	7	0.109375	0.00182343	0.0427016
ESTNV_31902_575	C	64	1	0	0
GCR_hBin35499_Ctg1_49	G	64	1	0	0
GCR_cBin16471_Ctg1_206	A	1	0.0172414	0.000287015	0.0169415
GCR_cBin16471_Ctg1_206	C	57	0.982759	0.000287015	0.0169415
GCR_cBin16471_Ctg1_71	T	64	1	0	0
GCR_cBin16471_Ctg1_124	A	62	1	0	0
ESTNV_27014_209	A	14	0.21875	0.00338745	0.0582018
ESTNV_27014_209	C	50	0.78125	0.00338745	0.0582018
GCR_cBin15459_Ctg1_100	A	64	1	0	0
GCR_cBin16478_Ctg1_193	A	9	0.140625	0.00255585	0.0505554
GCR_cBin16478_Ctg1_193	G	55	0.859375	0.00255585	0.0505554
GCR_cBin16478_Ctg1_145	A	55	0.859375	0.00255585	0.0505554
GCR_cBin16478_Ctg1_145	C	9	0.140625	0.00255585	0.0505554
ESTV_13924_444	A	64	1	0	0
GCR_cBin15021_Ctg1_82	A	5	0.078125	0.00102997	0.0320931
GCR_cBin15021_Ctg1_82	G	59	0.921875	0.00102997	0.0320931
GCR_cBin15223_Ctg1_361	A	34	0.53125	0.00387573	0.0622554
GCR_cBin15223_Ctg1_361	C	30	0.46875	0.00387573	0.0622554
GCR_cBin13670_Ctg1_82	A	37	0.578125	0.00347137	0.0589184
GCR_cBin13670_Ctg1_82	G	27	0.421875	0.00347137	0.0589184
GCR_cBin17273_Ctg1_191	C	61	0.953125	0.000663757	0.0257635
GCR_cBin17273_Ctg1_191	G	3	0.046875	0.000663757	0.0257635
ESTNV_35671_745	A	41	0.640625	0.00450897	0.0671489
ESTNV_35671_745	G	23	0.359375	0.00450897	0.0671489
GCR_cBin2437_Ctg1_74	A	12	0.1875	0.00231934	0.0481595
GCR_cBin2437_Ctg1_74	C	52	0.8125	0.00231934	0.0481595
ESTV_20002_108	A	34	0.53125	0.00436401	0.0660607
ESTV_20002_108	C	30	0.46875	0.00436401	0.0660607
ESTNV_27042_601	G	64	1	0	0
GCR_cBin5673_Ctg1_49	G	64	1	0	0
ESTNV_14277_249	G	64	1	0	0
ESTV_21870_705	A	64	1	0	0
ESTNV_32741_523	A	16	0.258065	0.00305461	0.0552686
ESTNV_32741_523	G	46	0.741935	0.00305461	0.0552686
ESTNV_24857_790	A	42	0.65625	0.00411987	0.0641862
ESTNV_24857_790	C	22	0.34375	0.00411987	0.0641862
GCR_cBin37659_Ctg1_151	A	44	0.6875	0.00378418	0.0615157
GCR_cBin37659_Ctg1_151	G	20	0.3125	0.00378418	0.0615157
GCR_cBin31955_Ctg1_100	C	64	1	0	0
GCR_cBin27635_Ctg1_277	A	15	0.234375	0.0019455	0.0441078
GCR_cBin27635_Ctg1_277	G	49	0.765625	0.0019455	0.0441078
GCR_cBin20771_Ctg1_93	A	51	0.796875	0.00188446	0.0434104
GCR_cBin20771_Ctg1_93	C	13	0.203125	0.00188446	0.0434104
GCR_cBin33206_Ctg1_109	A	42	0.65625	0.00411987	0.0641862
GCR_cBin33206_Ctg1_109	G	22	0.34375	0.00411987	0.0641862
GCR_cBin39280_Ctg1_175	A	22	0.34375	0.00411987	0.0641862
GCR_cBin39280_Ctg1_175	G	42	0.65625	0.00411987	0.0641862
GCR_cBin8844_Ctg1_179	A	1	0.015625	0.000236511	0.0153789
GCR_cBin8844_Ctg1_179	C	63	0.984375	0.000236511	0.0153789
GCR_cBin3000_Ctg1_193	A	46	0.71875	0.00387573	0.0622554
GCR_cBin3000_Ctg1_193	C	18	0.28125	0.00387573	0.0622554
GCR_cBin13782_Ctg1_64	A	49	0.765625	0.00341034	0.0583981
GCR_cBin13782_Ctg1_64	G	15	0.234375	0.00341034	0.0583981
GCR_cBin13782_Ctg1_67	A	15	0.234375	0.00341034	0.0583981
GCR_cBin13782_Ctg1_67	G	49	0.765625	0.00341034	0.0583981
GCR_cBin4290_Ctg1_99	A	63	0.984375	0.000236511	0.0153789
GCR_cBin4290_Ctg1_99	G	1	0.015625	0.000236511	0.0153789
ESTV_14384_381	A	14	0.21875	0.00338745	0.0582018
ESTV_14384_381	G	50	0.78125	0.00338745	0.0582018
ESTV_14384_462	A	36	0.5625	0.0032959	0.0574099
ESTV_14384_462	G	28	0.4375	0.0032959	0.0574099
GCR_cBin6121_Ctg1_367	A	61	0.953125	0.000663757	0.0257635
GCR_cBin6121_Ctg1_367	G	3	0.046875	0.000663757	0.0257635
ESTNV_17668_287	C	64	1	0	0
GCR_cBin40305_Ctg1_70	A	21	0.328125	0.00322723	0.0568087
GCR_cBin40305_Ctg1_70	C	43	0.671875	0.00322723	0.0568087
ESTNV_30479_547	A	39	0.609375	0.00279999	0.0529149
ESTNV_30479_547	G	25	0.390625	0.00279999	0.0529149
ESTNV_31404_229	A	22	0.34375	0.00314331	0.0560652
ESTNV_31404_229	G	42	0.65625	0.00314331	0.0560652
ESTNV_30479_231	A	25	0.390625	0.00279999	0.0529149
ESTNV_30479_231	G	39	0.609375	0.00279999	0.0529149
GCR_cBin1265_Ctg1_271	A	63	0.984375	0.000236511	0.0153789
GCR_cBin1265_Ctg1_271	G	1	0.015625	0.000236511	0.0153789
ESTV_13564_420	A	64	1	0	0
ESTNV_33910_178	G	64	1	0	0
ESTNV_34839_90	A	38	0.59375	0.00216675	0.0465483
ESTNV_34839_90	C	26	0.40625	0.00216675	0.0465483
GCR_cBin10569_Ctg1_129	T	64	1	0	0
GCR_cBin9725_Ctg1_201	A	50	0.806452	0.00243362	0.0493317
GCR_cBin9725_Ctg1_201	G	12	0.193548	0.00243362	0.0493317
GCR_cBin1989_Ctg1_199	G	64	1	0	0
ESTNV_31700_458	A	64	1	0	0
ESTV_15483_482	A	31	0.484375	0.00267792	0.0517486
ESTV_15483_482	G	33	0.515625	0.00267792	0.0517486
ESTV_15483_319	A	33	0.515625	0.00267792	0.0517486
ESTV_15483_319	C	31	0.484375	0.00267792	0.0517486
ESTV_15483_283	A	31	0.484375	0.00267792	0.0517486
ESTV_15483_283	G	33	0.515625	0.00267792	0.0517486
ESTNV_33733_642	A	51	0.796875	0.00188446	0.0434104
ESTNV_33733_642	G	13	0.203125	0.00188446	0.0434104
GCR_cBin13944_Ctg1_178	A	51	0.796875	0.00188446	0.0434104
GCR_cBin13944_Ctg1_178	G	13	0.203125	0.00188446	0.0434104
GCR_cBin25656_Ctg1_179	A	56	0.875	0.00146484	0.0382733
GCR_cBin25656_Ctg1_179	G	8	0.125	0.00146484	0.0382733
GCR_cBin41229_Ctg1_194	A	13	0.203125	0.00188446	0.0434104
GCR_cBin41229_Ctg1_194	G	51	0.796875	0.00188446	0.0434104
ESTNV_33473_135	T	64	1	0	0
ESTV_21735_605	G	64	1	0	0
GCR_cBin3012_Ctg1_287	A	19	0.306452	0.00399449	0.063202
GCR_cBin3012_Ctg1_287	G	43	0.693548	0.00399449	0.063202
ESTNV_34441_695	C	61	0.953125	0.000663757	0.0257635
ESTNV_34441_695	G	3	0.046875	0.000663757	0.0257635
GCR_cBin23239_Ctg1_26	A	50	0.78125	0.00192261	0.0438475
GCR_cBin23239_Ctg1_26	G	14	0.21875	0.00192261	0.0438475
ESTNV_30427_157	G	64	1	0	0
ESTNV_35667_737	A	5	0.078125	0.00102997	0.0320931
ESTNV_35667_737	G	59	0.921875	0.00102997	0.0320931
GCR_cBin9838_Ctg1_90	A	6	0.09375	0.00167847	0.0409691
GCR_cBin9838_Ctg1_90	G	58	0.90625	0.00167847	0.0409691
ESTNV_37037_693	A	31	0.484375	0.00414276	0.0643643
ESTNV_37037_693	G	33	0.515625	0.00414276	0.0643643
ESTV_12974_407	A	33	0.515625	0.00414276	0.0643643
ESTV_12974_407	G	31	0.484375	0.00414276	0.0643643
ESTNV_24496_456	A	31	0.484375	0.00414276	0.0643643
ESTNV_24496_456	G	33	0.515625	0.00414276	0.0643643
ESTNV_31072_1031	A	1	0.015625	0.000236511	0.0153789
ESTNV_31072_1031	T	63	0.984375	0.000236511	0.0153789
ESTV_12974_300	G	64	1	0	0
ESTNV_31072_1221	A	64	1	0	0
GCR_cBin4748_Ctg1_165	A	31	0.484375	0.00414276	0.0643643
GCR_cBin4748_Ctg1_165	G	33	0.515625	0.00414276	0.0643643
ESTNV_36029_386	A	56	0.875	0.00195312	0.0441942
ESTNV_36029_386	C	8	0.125	0.00195312	0.0441942
GCR_cBin41664_Ctg1_107	A	28	0.4375	0.0032959	0.0574099
GCR_cBin41664_Ctg1_107	G	36	0.5625	0.0032959	0.0574099
ESTNV_33377_117	A	64	1	0	0
ESTNV_32544_888	A	62	0.96875	0.000457764	0.0213954
ESTNV_32544_888	T	2	0.03125	0.000457764	0.0213954
ESTV_16219_102	A	5	0.078125	0.00102997	0.0320931
ESTV_16219_102	C	59	0.921875	0.00102997	0.0320931
GCR_cBin24154_Ctg1_116	A	25	0.390625	0.00133514	0.0365396
GCR_cBin24154_Ctg1_116	G	39	0.609375	0.00133514	0.0365396
ESTNV_36125_1524	A	64	1	0	0
ESTNV_32977_454	A	28	0.4375	0.0032959	0.0574099
ESTNV_32977_454	G	36	0.5625	0.0032959	0.0574099
ESTNV_36125_1625	A	48	0.75	0.00195312	0.0441942
ESTNV_36125_1625	C	16	0.25	0.00195312	0.0441942
GCR_hBin36356_Ctg1_59	A	27	0.421875	0.00395966	0.0629258
GCR_hBin36356_Ctg1_59	C	37	0.578125	0.00395966	0.0629258
ESTNV_12926_381	C	64	1	0	0
ESTNV_31421_450	A	4	0.0625	0.000854492	0.0292317
ESTNV_31421_450	G	60	0.9375	0.000854492	0.0292317
ESTNV_25560_280	A	37	0.578125	0.00395966	0.0629258
ESTNV_25560_280	C	27	0.421875	0.00395966	0.0629258
ESTNV_25560_563	A	37	0.578125	0.00395966	0.0629258
ESTNV_25560_563	C	27	0.421875	0.00395966	0.0629258
ESTNV_36961_536	G	64	1	0	0
GCR_cBin35192_Ctg1_126	A	61	0.983871	0.000251754	0.0158668
GCR_cBin35192_Ctg1_126	G	1	0.016129	0.000251754	0.0158668
GCR_cBin37731_Ctg1_46	A	64	1	0	0
GCR_cBin42489_Ctg1_138	G	64	1	0	0
ESTNV_34292_856	A	49	0.765625	0.00243378	0.0493333
ESTNV_34292_856	G	15	0.234375	0.00243378	0.0493333
ESTNV_36824_935	C	26	0.40625	0.00460815	0.0678834
[truncated: 5,899 more rows]

## Sheet: LL_Pya
File S1. SNP allele frequencies per population. LL_SYS
SNP_ID	Allele	Count	Frequency	Variance	SD
GCR_cBin24032_Ctg1_76	T	80	1	0	0
GCR_cBin13749_Ctg1_18	A	4	0.05	0.0005625	0.0237171
GCR_cBin13749_Ctg1_18	C	76	0.95	0.0005625	0.0237171
ESTNV_28684_665	A	68	0.871795	0.00122221	0.0349601
ESTNV_28684_665	G	10	0.128205	0.00122221	0.0349601
GCR_cBin32777_Ctg1_66	C	7	0.0875	0.000902344	0.030039
GCR_cBin32777_Ctg1_66	G	73	0.9125	0.000902344	0.030039
GCR_cBin13749_Ctg1_171	A	80	1	0	0
GCR_cBin22083_Ctg1_38	A	29	0.3625	0.00218359	0.0467289
GCR_cBin22083_Ctg1_38	C	51	0.6375	0.00218359	0.0467289
GCR_cBin7800_Ctg1_739	A	75	0.9375	0.000683594	0.0261456
GCR_cBin7800_Ctg1_739	T	5	0.0625	0.000683594	0.0261456
ESTV_16768_432	A	44	0.55	0.0024375	0.049371
ESTV_16768_432	T	36	0.45	0.0024375	0.049371
GCR_cBin42907_Ctg1_150	C	44	0.55	0.0036875	0.0607248
GCR_cBin42907_Ctg1_150	G	36	0.45	0.0036875	0.0607248
GCR_rBin14981_Ctg1_193	A	2	0.025	0.000296875	0.0172301
GCR_rBin14981_Ctg1_193	C	78	0.975	0.000296875	0.0172301
ESTNV_26586_283	A	32	0.4	0.0019375	0.044017
ESTNV_26586_283	T	48	0.6	0.0019375	0.044017
ESTNV_34251_1165	G	80	1	0	0
ESTNV_34453_617	A	78	0.975	0.000296875	0.0172301
ESTNV_34453_617	G	2	0.025	0.000296875	0.0172301
GCR_cBin5720_Ctg1_153	C	24	0.3	0.0024375	0.049371
GCR_cBin5720_Ctg1_153	G	56	0.7	0.0024375	0.049371
ESTV_13344_491	A	56	0.7	0.0024375	0.049371
ESTV_13344_491	C	24	0.3	0.0024375	0.049371
ESTNV_32810_1998	A	24	0.3	0.0024375	0.049371
ESTNV_32810_1998	C	56	0.7	0.0024375	0.049371
ESTV_12810_403	G	80	1	0	0
ESTV_12810_361	G	80	1	0	0
ESTNV_30347_550	T	80	1	0	0
ESTNV_27471_81	A	80	1	0	0
GCR_cBin23673_Ctg1_272	G	80	1	0	0
GCR_cBin49919_Ctg1_51	A	34	0.425	0.00454687	0.0674305
GCR_cBin49919_Ctg1_51	C	46	0.575	0.00454687	0.0674305
GCR_cBin3018_Ctg1_120	A	41	0.5125	0.00296484	0.0544504
GCR_cBin3018_Ctg1_120	G	39	0.4875	0.00296484	0.0544504
GCR_cBin3018_Ctg1_570	A	41	0.5125	0.00296484	0.0544504
GCR_cBin3018_Ctg1_570	C	39	0.4875	0.00296484	0.0544504
GCR_cBin3018_Ctg1_511	A	39	0.4875	0.00296484	0.0544504
GCR_cBin3018_Ctg1_511	G	41	0.5125	0.00296484	0.0544504
GCR_cBin8091_Ctg1_197	A	14	0.175	0.00142187	0.0377078
GCR_cBin8091_Ctg1_197	T	66	0.825	0.00142187	0.0377078
GCR_cBin8091_Ctg1_368	A	80	1	0	0
GCR_cBin38678_Ctg1_119	G	80	1	0	0
GCR_cBin26178_Ctg1_157	A	69	0.8625	0.00124609	0.0353001
GCR_cBin26178_Ctg1_157	T	11	0.1375	0.00124609	0.0353001
ESTNV_35287_375	A	52	0.65	0.0031875	0.0564579
ESTNV_35287_375	G	28	0.35	0.0031875	0.0564579
ESTNV_32999_885	A	39	0.4875	0.00421484	0.0649218
ESTNV_32999_885	G	41	0.5125	0.00421484	0.0649218
ESTV_13371_209	A	40	0.5	0.004375	0.0661438
ESTV_13371_209	C	40	0.5	0.004375	0.0661438
ESTNV_20700_631	A	24	0.3	0.003375	0.0580948
ESTNV_20700_631	G	56	0.7	0.003375	0.0580948
ESTNV_34751_1764	A	66	0.825	0.00173438	0.0416458
ESTNV_34751_1764	C	14	0.175	0.00173438	0.0416458
ESTNV_34751_1633	A	66	0.825	0.00173438	0.0416458
ESTNV_34751_1633	G	14	0.175	0.00173438	0.0416458
GCR_cBin4736_Ctg1_83	A	80	1	0	0
ESTNV_35283_192	A	53	0.6625	0.00355859	0.0596539
ESTNV_35283_192	C	27	0.3375	0.00355859	0.0596539
GCR_cBin30159_Ctg1_115	A	36	0.45	0.0018125	0.0425735
GCR_cBin30159_Ctg1_115	G	44	0.55	0.0018125	0.0425735
GCR_cBin20874_Ctg1_187	A	80	1	0	0
GCR_cBin7930_Ctg1_81	A	80	1	0	0
GCR_cBin12902_Ctg1_491	A	37	0.4625	0.00324609	0.0569745
GCR_cBin12902_Ctg1_491	G	43	0.5375	0.00324609	0.0569745
ESTNV_32983_812	A	38	0.475	0.00248438	0.0498435
ESTNV_32983_812	G	42	0.525	0.00248438	0.0498435
ESTV_11898_329	G	80	1	0	0
ESTV_11898_340	A	47	0.5875	0.00246484	0.0496472
ESTV_11898_340	C	33	0.4125	0.00246484	0.0496472
ESTNV_26718_947	A	80	1	0	0
ESTV_16673_1575	A	19	0.2375	0.00218359	0.0467289
ESTV_16673_1575	G	61	0.7625	0.00218359	0.0467289
GCR_cBin47076_Ctg1_116	A	13	0.166667	0.0014245	0.0377426
GCR_cBin47076_Ctg1_116	G	65	0.833333	0.0014245	0.0377426
GCR_cBin38737_Ctg1_101	A	14	0.175	0.00142187	0.0377078
GCR_cBin38737_Ctg1_101	G	66	0.825	0.00142187	0.0377078
GCR_cBin29198_Ctg1_37	A	66	0.825	0.00142187	0.0377078
GCR_cBin29198_Ctg1_37	C	14	0.175	0.00142187	0.0377078
GCR_cBin31010_Ctg1_231	C	80	1	0	0
GCR_cBin42440_Ctg1_139	A	79	0.9875	0.000152344	0.0123428
GCR_cBin42440_Ctg1_139	G	1	0.0125	0.000152344	0.0123428
ESTNV_32327_914	A	66	0.825	0.00142187	0.0377078
ESTNV_32327_914	G	14	0.175	0.00142187	0.0377078
GCR_hBin38301_Ctg1_117	T	80	1	0	0
ESTV_16226_67	A	46	0.575	0.00360938	0.0600781
ESTV_16226_67	G	34	0.425	0.00360938	0.0600781
GCR_cBin8657_Ctg1_79	A	45	0.5625	0.00349609	0.0591278
GCR_cBin8657_Ctg1_79	C	35	0.4375	0.00349609	0.0591278
ESTV_20115_337	A	27	0.3375	0.00324609	0.0569745
ESTV_20115_337	G	53	0.6625	0.00324609	0.0569745
GCR_cBin15162_Ctg1_205	A	80	1	0	0
GCR_cBin21922_Ctg1_271	A	73	0.9125	0.000902344	0.030039
GCR_cBin21922_Ctg1_271	G	7	0.0875	0.000902344	0.030039
GCR_cBin21922_Ctg1_272	A	7	0.0875	0.000902344	0.030039
GCR_cBin21922_Ctg1_272	C	73	0.9125	0.000902344	0.030039
ESTNV_28147_868	T	80	1	0	0
GCR_cBin17189_Ctg1_418	A	37	0.4625	0.00262109	0.0511966
GCR_cBin17189_Ctg1_418	G	43	0.5375	0.00262109	0.0511966
GCR_cBin34_Ctg1_596	A	70	0.875	0.00117187	0.0342327
GCR_cBin34_Ctg1_596	C	10	0.125	0.00117187	0.0342327
GCR_cBin2124_Ctg1_298	A	80	1	0	0
ESTNV_36830_1365	G	80	1	0	0
ESTV_16585_88	A	80	1	0	0
GCR_cBin33029_Ctg1_110	G	80	1	0	0
ESTNV_35593_589	A	80	1	0	0
GCR_cBin29162_Ctg1_328	G	80	1	0	0
GCR_cBin29853_Ctg1_324	T	80	1	0	0
GCR_cBin4502_Ctg2_241	C	64	0.8	0.0015	0.0387298
GCR_cBin4502_Ctg2_241	G	16	0.2	0.0015	0.0387298
ESTNV_35593_1402	A	80	1	0	0
GCR_cBin7483_Ctg1_160	G	80	1	0	0
GCR_hBin16230_Ctg1_42	G	80	1	0	0
ESTNV_35108_1142	A	80	1	0	0
ESTNV_32740_1792	A	2	0.025	0.000296875	0.0172301
ESTNV_32740_1792	T	78	0.975	0.000296875	0.0172301
ESTNV_18010_624	A	80	1	0	0
ESTNV_33627_835	A	28	0.35	0.0025625	0.0506211
ESTNV_33627_835	G	52	0.65	0.0025625	0.0506211
ESTNV_33761_306	A	80	1	0	0
ESTNV_35278_946	C	80	1	0	0
ESTNV_32069_319	A	80	1	0	0
GCR_cBin31757_Ctg1_238	A	27	0.3375	0.00199609	0.0446777
GCR_cBin31757_Ctg1_238	C	53	0.6625	0.00199609	0.0446777
ESTNV_34322_888	A	57	0.7125	0.00152734	0.0390812
ESTNV_34322_888	T	23	0.2875	0.00152734	0.0390812
ESTNV_13218_450	A	29	0.3625	0.00249609	0.0499609
ESTNV_13218_450	G	51	0.6375	0.00249609	0.0499609
ESTV_19854_114	A	35	0.4375	0.00224609	0.047393
ESTV_19854_114	C	45	0.5625	0.00224609	0.047393
GCR_cBin40971_Ctg1_99	A	80	1	0	0
ESTNV_35964_989	C	80	1	0	0
GCR_cBin18615_Ctg1_159	A	80	1	0	0
ESTNV_33535_713	A	7	0.0875	0.000902344	0.030039
ESTNV_33535_713	C	73	0.9125	0.000902344	0.030039
GCR_cBin48650_Ctg1_186	G	80	1	0	0
ESTNV_36924_232	A	64	0.8	0.0018125	0.0425735
ESTNV_36924_232	C	16	0.2	0.0018125	0.0425735
ESTNV_36384_1752	A	80	1	0	0
ESTNV_35253_493	A	78	0.975	0.000296875	0.0172301
ESTNV_35253_493	G	2	0.025	0.000296875	0.0172301
ESTNV_33535_853	A	7	0.0875	0.000902344	0.030039
ESTNV_33535_853	G	73	0.9125	0.000902344	0.030039
GCR_cBin45827_Ctg1_60	C	80	1	0	0
ESTV_15080_392	A	47	0.5875	0.00340234	0.0583296
ESTV_15080_392	G	33	0.4125	0.00340234	0.0583296
GCR_cBin44622_Ctg1_29	A	31	0.407895	0.00375875	0.0613086
GCR_cBin44622_Ctg1_29	G	45	0.592105	0.00375875	0.0613086
GCR_cBin46385_Ctg1_67	G	80	1	0	0
GCR_cBin572_Ctg1_59	A	78	1	0	0
ESTNV_28108_776	A	59	0.7375	0.00218359	0.0467289
ESTNV_28108_776	C	21	0.2625	0.00218359	0.0467289
ESTNV_35762_168	A	27	0.3375	0.00262109	0.0511966
ESTNV_35762_168	C	53	0.6625	0.00262109	0.0511966
GCR_cBin46046_Ctg1_198	A	21	0.2625	0.00218359	0.0467289
GCR_cBin46046_Ctg1_198	C	59	0.7375	0.00218359	0.0467289
GCR_cBin33614_Ctg1_90	G	80	1	0	0
GCR_cBin17465_Ctg1_129	C	8	0.1	0.001	0.0316228
GCR_cBin17465_Ctg1_129	G	72	0.9	0.001	0.0316228
ESTNV_30075_59	A	42	0.525	0.00248438	0.0498435
ESTNV_30075_59	C	38	0.475	0.00248438	0.0498435
ESTV_21602_820	A	80	1	0	0
GCR_cBin43822_Ctg1_97	A	80	1	0	0
ESTNV_32753_1727	G	80	1	0	0
GCR_cBin45576_Ctg1_50	A	80	1	0	0
GCR_cBin1952_Ctg1_280	G	80	1	0	0
GCR_cBin38681_Ctg1_218	C	80	1	0	0
GCR_cBin6340_Ctg1_59	A	80	1	0	0
GCR_cBin11187_Ctg1_62	G	80	1	0	0
GCR_cBin7014_Ctg1_132	A	26	0.325	0.00235937	0.0485734
GCR_cBin7014_Ctg1_132	G	54	0.675	0.00235937	0.0485734
GCR_rBin10118_Ctg1_34	A	52	0.65	0.00225	0.0474342
GCR_rBin10118_Ctg1_34	G	28	0.35	0.00225	0.0474342
ESTNV_34021_1870	G	80	1	0	0
ESTNV_32103_191	C	80	1	0	0
GCR_cBin42179_Ctg1_389	C	80	1	0	0
GCR_cBin43281_Ctg1_51	A	20	0.25	0.003125	0.0559017
GCR_cBin43281_Ctg1_51	G	60	0.75	0.003125	0.0559017
GCR_cBin52844_Ctg1_180	A	15	0.1875	0.00177734	0.0421586
GCR_cBin52844_Ctg1_180	G	65	0.8125	0.00177734	0.0421586
GCR_cBin42179_Ctg1_350	G	80	1	0	0
GCR_cBin37910_Ctg1_93	A	47	0.5875	0.00277734	0.0527005
GCR_cBin37910_Ctg1_93	G	33	0.4125	0.00277734	0.0527005
GCR_cBin30294_Ctg1_36	C	23	0.2875	0.00246484	0.0496472
GCR_cBin30294_Ctg1_36	G	57	0.7125	0.00246484	0.0496472
ESTNV_28987_832	A	79	0.9875	0.000152344	0.0123428
ESTNV_28987_832	C	1	0.0125	0.000152344	0.0123428
GCR_cBin38428_Ctg1_72	A	80	1	0	0
GCR_cBin30905_Ctg1_38	C	80	1	0	0
ESTNV_30484_927	A	80	1	0	0
GCR_cBin28586_Ctg1_147	A	80	1	0	0
ESTNV_33760_518	C	80	1	0	0
GCR_cBin17730_Ctg1_232	A	80	1	0	0
GCR_cBin23510_Ctg1_150	A	80	1	0	0
GCR_cBin43132_Ctg1_139	A	80	1	0	0
ESTNV_33875_378	C	44	0.55	0.0030625	0.0553399
ESTNV_33875_378	G	36	0.45	0.0030625	0.0553399
ESTNV_35486_240	G	80	1	0	0
ESTNV_35163_1993	T	80	1	0	0
ESTNV_35486_738	C	80	1	0	0
GCR_cBin12492_Ctg1_178	G	80	1	0	0
ESTNV_35486_385	C	80	1	0	0
GCR_hBin7576_Ctg1_138	A	80	1	0	0
GCR_cBin12492_Ctg1_183	G	80	1	0	0
ESTNV_26437_1349	A	80	1	0	0
GCR_cBin10658_Ctg1_107	G	80	1	0	0
GCR_cBin33592_Ctg1_241	A	80	1	0	0
ESTNV_33888_314	G	80	1	0	0
GCR_cBin10390_Ctg1_228	A	58	0.725	0.00248438	0.0498435
GCR_cBin10390_Ctg1_228	C	22	0.275	0.00248438	0.0498435
ESTV_12221_170	G	80	1	0	0
GCR_cBin26140_Ctg1_118	G	80	1	0	0
GCR_cBin1019_Ctg1_221	A	80	1	0	0
GCR_cBin26140_Ctg1_33	A	80	1	0	0
ESTNV_27182_609	G	80	1	0	0
GCR_cBin27812_Ctg1_148	A	80	1	0	0
GCR_cBin26855_Ctg1_110	A	23	0.2875	0.00183984	0.0428934
GCR_cBin26855_Ctg1_110	C	57	0.7125	0.00183984	0.0428934
GCR_cBin39664_Ctg1_85	G	80	1	0	0
GCR_cBin38208_Ctg1_21	A	80	1	0	0
ESTV_15118_153	G	80	1	0	0
GCR_cBin47268_Ctg1_70	G	80	1	0	0
GCR_cBin47268_Ctg1_73	A	80	1	0	0
ESTNV_34296_693	A	78	0.975	0.000296875	0.0172301
ESTNV_34296_693	T	2	0.025	0.000296875	0.0172301
GCR_cBin18023_Ctg1_41	C	34	0.425	0.00204688	0.0452424
GCR_cBin18023_Ctg1_41	G	46	0.575	0.00204688	0.0452424
ESTNV_36480_1354	A	46	0.575	0.00204688	0.0452424
ESTNV_36480_1354	T	34	0.425	0.00204688	0.0452424
GCR_cBin34894_Ctg1_621	G	80	1	0	0
GCR_cBin26436_Ctg1_42	A	75	0.9375	0.000683594	0.0261456
GCR_cBin26436_Ctg1_42	G	5	0.0625	0.000683594	0.0261456
GCR_cBin24398_Ctg1_117	A	5	0.0625	0.000683594	0.0261456
GCR_cBin24398_Ctg1_117	G	75	0.9375	0.000683594	0.0261456
GCR_cBin3706_Ctg1_364	A	5	0.0625	0.000683594	0.0261456
GCR_cBin3706_Ctg1_364	G	75	0.9375	0.000683594	0.0261456
GCR_cBin23307_Ctg1_194	C	80	1	0	0
GCR_cBin12132_Ctg1_186	A	9	0.1125	0.00108984	0.0330128
GCR_cBin12132_Ctg1_186	G	71	0.8875	0.00108984	0.0330128
GCR_cBin5178_Ctg1_86	A	7	0.0875	0.000902344	0.030039
GCR_cBin5178_Ctg1_86	G	73	0.9125	0.000902344	0.030039
GCR_cBin12749_Ctg1_233	A	56	0.7	0.0024375	0.049371
GCR_cBin12749_Ctg1_233	G	24	0.3	0.0024375	0.049371
GCR_cBin45817_Ctg1_71	A	24	0.3	0.0024375	0.049371
GCR_cBin45817_Ctg1_71	G	56	0.7	0.0024375	0.049371
ESTNV_26350_156	C	80	1	0	0
ESTNV_21694_208	A	24	0.3	0.0024375	0.049371
ESTNV_21694_208	G	56	0.7	0.0024375	0.049371
ESTNV_29851_266	A	14	0.175	0.00173438	0.0416458
ESTNV_29851_266	G	66	0.825	0.00173438	0.0416458
GCR_cBin19407_Ctg1_54	A	41	0.5125	0.00265234	0.0515009
GCR_cBin19407_Ctg1_54	G	39	0.4875	0.00265234	0.0515009
GCR_cBin12450_Ctg1_432	C	80	1	0	0
ESTV_14230_80	A	8	0.1	0.0013125	0.0362284
ESTV_14230_80	C	72	0.9	0.0013125	0.0362284
GCR_cBin5917_Ctg1_208	A	78	0.975	0.000296875	0.0172301
GCR_cBin5917_Ctg1_208	G	2	0.025	0.000296875	0.0172301
GCR_cBin1185_Ctg1_145	G	80	1	0	0
GCR_hBin21729_Ctg1_51	A	80	1	0	0
GCR_cBin37146_Ctg1_312	C	7	0.0897436	0.000944048	0.0307254
GCR_cBin37146_Ctg1_312	G	71	0.910256	0.000944048	0.0307254
GCR_cBin5718_Ctg1_42	A	77	0.9625	0.000433594	0.0208229
GCR_cBin5718_Ctg1_42	G	3	0.0375	0.000433594	0.0208229
GCR_cBin32973_Ctg1_81	A	80	1	0	0
GCR_cBin32973_Ctg1_29	A	45	0.5625	0.00349609	0.0591278
GCR_cBin32973_Ctg1_29	G	35	0.4375	0.00349609	0.0591278
ESTNV_22623_238	A	50	0.625	0.00304688	0.0551985
ESTNV_22623_238	G	30	0.375	0.00304688	0.0551985
GCR_cBin35013_Ctg1_144	A	5	0.0625	0.000683594	0.0261456
GCR_cBin35013_Ctg1_144	G	75	0.9375	0.000683594	0.0261456
ESTNV_33390_1703	A	75	0.9375	0.000683594	0.0261456
ESTNV_33390_1703	G	5	0.0625	0.000683594	0.0261456
GCR_cBin28945_Ctg1_147	A	14	0.175	0.00173438	0.0416458
GCR_cBin28945_Ctg1_147	G	66	0.825	0.00173438	0.0416458
ESTNV_35898_1062	G	80	1	0	0
GCR_cBin26038_Ctg1_203	A	71	0.8875	0.00108984	0.0330128
GCR_cBin26038_Ctg1_203	G	9	0.1125	0.00108984	0.0330128
GCR_cBin5440_Ctg1_39	A	68	0.85	0.0013125	0.0362284
GCR_cBin5440_Ctg1_39	T	12	0.15	0.0013125	0.0362284
GCR_cBin32127_Ctg1_234	G	80	1	0	0
GCR_hBin19696_Ctg1_47	G	80	1	0	0
GCR_cBin32127_Ctg1_245	A	80	1	0	0
ESTNV_27431_454	A	8	0.1	0.001	0.0316228
ESTNV_27431_454	G	72	0.9	0.001	0.0316228
BASS14_B7_A02_640	A	70	0.875	0.00117187	0.0342327
BASS14_B7_A02_640	C	10	0.125	0.00117187	0.0342327
GCR_cBin41946_Ctg1_167	A	58	0.725	0.00185937	0.0431205
GCR_cBin41946_Ctg1_167	G	22	0.275	0.00185937	0.0431205
GCR_cBin41946_Ctg1_89	C	58	0.725	0.00185937	0.0431205
GCR_cBin41946_Ctg1_89	G	22	0.275	0.00185937	0.0431205
ESTNV_16068_255	C	80	1	0	0
GCR_cBin49053_Ctg1_111	G	80	1	0	0
ESTNV_35810_833	A	80	1	0	0
GCR_hBin18139_Ctg1_60	A	1	0.0125	0.000152344	0.0123428
GCR_hBin18139_Ctg1_60	C	79	0.9875	0.000152344	0.0123428
GCR_hBin18139_Ctg1_230	A	1	0.0125	0.000152344	0.0123428
GCR_hBin18139_Ctg1_230	G	79	0.9875	0.000152344	0.0123428
ESTNV_35810_643	C	80	1	0	0
ESTNV_17527_71	G	80	1	0	0
ESTNV_28091_630	A	78	1	0	0
ESTNV_25175_634	A	19	0.2375	0.00187109	0.0432561
ESTNV_25175_634	T	61	0.7625	0.00187109	0.0432561
GCR_cBin25193_Ctg1_80	A	57	0.7125	0.00215234	0.0463934
GCR_cBin25193_Ctg1_80	G	23	0.2875	0.00215234	0.0463934
ESTNV_27318_155	A	80	1	0	0
GCR_cBin1418_Ctg1_135	A	17	0.2125	0.00215234	0.0463934
GCR_cBin1418_Ctg1_135	C	63	0.7875	0.00215234	0.0463934
ESTNV_31116_191	A	80	1	0	0
ESTNV_25321_192	G	80	1	0	0
ESTNV_29115_481	A	13	0.1625	0.00137109	0.0370283
ESTNV_29115_481	C	67	0.8375	0.00137109	0.0370283
GCR_cBin19598_Ctg1_176	G	80	1	0	0
ESTNV_31863_1602	T	80	1	0	0
GCR_cBin545_Ctg1_206	C	80	1	0	0
BASS11_B7_G05_472	C	80	1	0	0
GCR_cBin17574_Ctg1_128	C	80	1	0	0
BASS11_B7_G05_384	A	50	0.625	0.00242187	0.0492125
BASS11_B7_G05_384	C	30	0.375	0.00242187	0.0492125
BASS11_B7_G05_691	C	80	1	0	0
ESTNV_23544_330	C	78	1	0	0
BASS117_B7_E04_685	G	80	1	0	0
BASS117_B7_E04_554	A	80	1	0	0
GCR_cBin50585_Ctg1_139	C	80	1	0	0
GCR_cBin37317_Ctg1_131	G	80	1	0	0
ESTNV_33213_337	T	80	1	0	0
GCR_hBin35252_Ctg1_84	A	80	1	0	0
GCR_cBin6519_Ctg1_383	G	80	1	0	0
GCR_cBin6519_Ctg1_116	T	80	1	0	0
GCR_cBin16390_Ctg1_172	A	13	0.1625	0.00168359	0.0410316
GCR_cBin16390_Ctg1_172	C	67	0.8375	0.00168359	0.0410316
ESTNV_30332_660	G	80	1	0	0
GCR_cBin37317_Ctg1_184	A	80	1	0	0
GCR_cBin16390_Ctg1_190	A	67	0.8375	0.00168359	0.0410316
GCR_cBin16390_Ctg1_190	C	13	0.1625	0.00168359	0.0410316
ESTNV_34569_1252	C	80	1	0	0
ESTV_14468_119	G	80	1	0	0
ESTV_18722_351	A	41	0.5125	0.00233984	0.0483719
ESTV_18722_351	G	39	0.4875	0.00233984	0.0483719
ESTNV_36348_720	A	39	0.4875	0.00233984	0.0483719
ESTNV_36348_720	C	41	0.5125	0.00233984	0.0483719
ESTNV_28229_1264	A	80	1	0	0
ESTNV_34569_753	C	80	1	0	0
ESTNV_33934_55	A	80	1	0	0
BASS115_B6A_H02_496	A	60	0.769231	0.00225054	0.0474399
BASS115_B6A_H02_496	C	18	0.230769	0.00225054	0.0474399
GCR_cBin15671_Ctg1_125	A	79	0.9875	0.000152344	0.0123428
GCR_cBin15671_Ctg1_125	T	1	0.0125	0.000152344	0.0123428
GCR_cBin48621_Ctg1_143	A	80	1	0	0
ESTNV_36486_673	G	80	1	0	0
GCR_cBin26183_Ctg1_163	A	80	1	0	0
GCR_cBin48621_Ctg1_146	G	80	1	0	0
ESTNV_31699_1208	C	80	1	0	0
ESTNV_36170_1803	A	80	1	0	0
ESTNV_26803_666	G	80	1	0	0
GCR_cBin24983_Ctg1_211	A	29	0.3625	0.00249609	0.0499609
GCR_cBin24983_Ctg1_211	C	51	0.6375	0.00249609	0.0499609
GCR_cBin33457_Ctg1_198	A	1	0.0125	0.000152344	0.0123428
GCR_cBin33457_Ctg1_198	C	79	0.9875	0.000152344	0.0123428
GCR_cBin38774_Ctg1_204	C	74	0.925	0.000796875	0.028229
GCR_cBin38774_Ctg1_204	G	6	0.075	0.000796875	0.028229
ESTNV_36426_226	A	28	0.35	0.00225	0.0474342
ESTNV_36426_226	G	52	0.65	0.00225	0.0474342
GCR_cBin33503_Ctg1_290	G	80	1	0	0
ESTV_15074_164	A	20	0.25	0.001875	0.0433013
ESTV_15074_164	G	60	0.75	0.001875	0.0433013
ESTNV_36002_1472	A	80	1	0	0
ESTNV_15285_387	C	2	0.025	0.000296875	0.0172301
ESTNV_15285_387	G	78	0.975	0.000296875	0.0172301
GCR_cBin27216_Ctg1_405	G	80	1	0	0
GCR_cBin8947_Ctg1_161	A	74	0.925	0.000796875	0.028229
GCR_cBin8947_Ctg1_161	G	6	0.075	0.000796875	0.028229
GCR_cBin33503_Ctg1_345	A	80	1	0	0
GCR_cBin48593_Ctg1_152	C	80	1	0	0
GCR_cBin47309_Ctg1_158	C	21	0.2625	0.00280859	0.0529962
GCR_cBin47309_Ctg1_158	G	59	0.7375	0.00280859	0.0529962
GCR_hBin21216_Ctg1_199	A	80	1	0	0
GCR_cBin31719_Ctg1_177	A	80	1	0	0
GCR_cBin19824_Ctg1_145	G	80	1	0	0
ESTNV_25685_546	G	80	1	0	0
ESTNV_33470_753	A	80	1	0	0
ESTNV_27944_196	A	80	1	0	0
ESTNV_36724_118	G	80	1	0	0
ESTNV_35192_247	A	58	0.725	0.00310938	0.0557618
ESTNV_35192_247	T	22	0.275	0.00310938	0.0557618
BASS114_B6A_B06_105	A	37	0.4625	0.00262109	0.0511966
BASS114_B6A_B06_105	C	43	0.5375	0.00262109	0.0511966
ESTNV_35192_126	A	22	0.275	0.00310938	0.0557618
ESTNV_35192_126	C	58	0.725	0.00310938	0.0557618
GCR_cBin25759_Ctg1_44	C	5	0.0625	0.000683594	0.0261456
GCR_cBin25759_Ctg1_44	G	75	0.9375	0.000683594	0.0261456
GCR_cBin29181_Ctg1_51	A	33	0.423077	0.00379305	0.0615878
GCR_cBin29181_Ctg1_51	T	45	0.576923	0.00379305	0.0615878
ESTV_17694_278	A	58	0.725	0.00279687	0.0528855
ESTV_17694_278	G	22	0.275	0.00279687	0.0528855
GCR_cBin698_Ctg1_258	A	22	0.275	0.00279687	0.0528855
GCR_cBin698_Ctg1_258	T	58	0.725	0.00279687	0.0528855
GCR_cBin698_Ctg1_256	A	58	0.725	0.00279687	0.0528855
GCR_cBin698_Ctg1_256	T	22	0.275	0.00279687	0.0528855
GCR_cBin698_Ctg1_215	A	22	0.275	0.00279687	0.0528855
GCR_cBin698_Ctg1_215	G	58	0.725	0.00279687	0.0528855
GCR_cBin698_Ctg1_125	A	80	1	0	0
ESTNV_34783_687	A	67	0.8375	0.00199609	0.0446777
ESTNV_34783_687	G	13	0.1625	0.00199609	0.0446777
GCR_cBin705_Ctg1_218	A	22	0.275	0.00248438	0.0498435
GCR_cBin705_Ctg1_218	G	58	0.725	0.00248438	0.0498435
GCR_cBin705_Ctg1_366	A	58	0.725	0.00248438	0.0498435
GCR_cBin705_Ctg1_366	G	22	0.275	0.00248438	0.0498435
GCR_cBin705_Ctg1_123	A	58	0.725	0.00248438	0.0498435
GCR_cBin705_Ctg1_123	G	22	0.275	0.00248438	0.0498435
GCR_cBin19367_Ctg1_143	A	80	1	0	0
ESTV_15107_389	G	80	1	0	0
ESTNV_36706_574	A	80	1	0	0
ESTNV_27242_211	G	80	1	0	0
ESTV_20675_499	G	80	1	0	0
GCR_cBin8347_Ctg1_155	A	59	0.7375	0.00249609	0.0499609
GCR_cBin8347_Ctg1_155	T	21	0.2625	0.00249609	0.0499609
GCR_hBin46188_Ctg1_237	T	80	1	0	0
GCR_cBin28712_Ctg1_124	C	80	1	0	0
GCR_hBin44277_Ctg1_106	A	80	1	0	0
ESTNV_36490_690	C	80	1	0	0
ESTV_21365_54	A	62	0.775	0.00185937	0.0431205
ESTV_21365_54	G	18	0.225	0.00185937	0.0431205
ESTNV_30166_762	C	77	0.9625	0.000433594	0.0208229
ESTNV_30166_762	G	3	0.0375	0.000433594	0.0208229
ESTNV_26125_188	A	31	0.3875	0.00171484	0.0414107
ESTNV_26125_188	C	49	0.6125	0.00171484	0.0414107
ESTNV_35823_463	A	3	0.0375	0.000433594	0.0208229
ESTNV_35823_463	C	77	0.9625	0.000433594	0.0208229
GCR_cBin42387_Ctg1_56	A	71	0.8875	0.00140234	0.0374479
GCR_cBin42387_Ctg1_56	G	9	0.1125	0.00140234	0.0374479
ESTNV_36853_78	C	18	0.225	0.00185937	0.0431205
ESTNV_36853_78	G	62	0.775	0.00185937	0.0431205
ESTNV_27947_584	A	62	0.775	0.00185937	0.0431205
ESTNV_27947_584	T	18	0.225	0.00185937	0.0431205
ESTNV_34937_1396	C	80	1	0	0
GCR_cBin21639_Ctg1_129	A	15	0.1875	0.00146484	0.0382733
GCR_cBin21639_Ctg1_129	G	65	0.8125	0.00146484	0.0382733
GCR_cBin13830_Ctg1_156	A	75	0.9375	0.000683594	0.0261456
GCR_cBin13830_Ctg1_156	G	5	0.0625	0.000683594	0.0261456
GCR_cBin9325_Ctg1_629	C	66	0.825	0.00142187	0.0377078
GCR_cBin9325_Ctg1_629	G	14	0.175	0.00142187	0.0377078
ESTNV_28515_410	C	80	1	0	0
ESTNV_26964_711	A	23	0.2875	0.00215234	0.0463934
ESTNV_26964_711	G	57	0.7125	0.00215234	0.0463934
GCR_cBin40533_Ctg1_184	A	72	0.9	0.001	0.0316228
GCR_cBin40533_Ctg1_184	G	8	0.1	0.001	0.0316228
ESTNV_26964_592	A	23	0.2875	0.00215234	0.0463934
ESTNV_26964_592	G	57	0.7125	0.00215234	0.0463934
GCR_cBin35156_Ctg1_47	A	9	0.1125	0.00108984	0.0330128
GCR_cBin35156_Ctg1_47	G	71	0.8875	0.00108984	0.0330128
ESTNV_24363_306	A	15	0.1875	0.00208984	0.0457148
ESTNV_24363_306	C	65	0.8125	0.00208984	0.0457148
ESTNV_32353_1231	A	75	0.9375	0.000683594	0.0261456
ESTNV_32353_1231	C	5	0.0625	0.000683594	0.0261456
GCR_cBin9554_Ctg1_111	A	21	0.2625	0.00187109	0.0432561
GCR_cBin9554_Ctg1_111	C	59	0.7375	0.00187109	0.0432561
GCR_cBin23594_Ctg1_69	A	27	0.3375	0.00262109	0.0511966
GCR_cBin23594_Ctg1_69	C	53	0.6625	0.00262109	0.0511966
GCR_cBin7278_Ctg1_101	A	32	0.4	0.00225	0.0474342
GCR_cBin7278_Ctg1_101	C	48	0.6	0.00225	0.0474342
GCR_cBin7278_Ctg1_140	A	32	0.4	0.00225	0.0474342
GCR_cBin7278_Ctg1_140	G	48	0.6	0.00225	0.0474342
GCR_cBin42013_Ctg1_64	A	80	1	0	0
ESTNV_30341_1348	A	46	0.575	0.00360938	0.0600781
ESTNV_30341_1348	T	34	0.425	0.00360938	0.0600781
GCR_cBin17069_Ctg1_53	A	55	0.6875	0.00271484	0.0521042
GCR_cBin17069_Ctg1_53	G	25	0.3125	0.00271484	0.0521042
GCR_cBin630_Ctg1_411	A	2	0.025	0.000296875	0.0172301
GCR_cBin630_Ctg1_411	G	78	0.975	0.000296875	0.0172301
GCR_cBin43670_Ctg1_77	A	69	0.8625	0.00155859	0.039479
GCR_cBin43670_Ctg1_77	G	11	0.1375	0.00155859	0.039479
ESTV_15992_330	A	61	0.7625	0.00187109	0.0432561
ESTV_15992_330	G	19	0.2375	0.00187109	0.0432561
ESTNV_28270_603	A	80	1	0	0
ESTNV_35703_1395	A	67	0.8375	0.00137109	0.0370283
ESTNV_35703_1395	G	13	0.1625	0.00137109	0.0370283
ESTNV_24638_210	C	80	1	0	0
ESTNV_36373_1935	A	80	1	0	0
ESTNV_27268_490	A	80	1	0	0
ESTNV_35486_1270	A	1	0.0125	0.000152344	0.0123428
ESTNV_35486_1270	G	79	0.9875	0.000152344	0.0123428
GCR_cBin36565_Ctg1_226	A	74	0.948718	0.00059003	0.0242905
GCR_cBin36565_Ctg1_226	G	4	0.0512821	0.00059003	0.0242905
GCR_cBin10083_Ctg1_32	A	80	1	0	0
GCR_cBin21674_Ctg1_331	A	12	0.153846	0.00169423	0.041161
GCR_cBin21674_Ctg1_331	T	66	0.846154	0.00169423	0.041161
ESTV_13245_584	A	42	0.525	0.00342188	0.0584968
ESTV_13245_584	C	38	0.475	0.00342188	0.0584968
ESTNV_33113_353	A	80	1	0	0
GCR_hBin21729_Ctg1_168	G	80	1	0	0
GCR_hBin43280_Ctg1_61	C	80	1	0	0
ESTV_15739_295	G	80	1	0	0
ESTNV_34055_242	G	80	1	0	0
ESTV_16262_1716	A	52	0.65	0.0025625	0.0506211
ESTV_16262_1716	G	28	0.35	0.0025625	0.0506211
ESTNV_25199_261	A	79	0.9875	0.000152344	0.0123428
ESTNV_25199_261	C	1	0.0125	0.000152344	0.0123428
GCR_cBin17416_Ctg1_223	C	80	1	0	0
GCR_hBin17624_Ctg1_81	C	80	1	0	0
GCR_cBin19146_Ctg1_97	A	15	0.1875	0.00177734	0.0421586
GCR_cBin19146_Ctg1_97	G	65	0.8125	0.00177734	0.0421586
ESTV_17233_535	A	49	0.6125	0.00265234	0.0515009
ESTV_17233_535	G	31	0.3875	0.00265234	0.0515009
ESTNV_23531_462	C	80	1	0	0
ESTV_7881_334	A	57	0.7125	0.00340234	0.0583296
ESTV_7881_334	G	23	0.2875	0.00340234	0.0583296
GCR_cBin25027_Ctg1_137	A	80	1	0	0
GCR_cBin41451_Ctg1_172	A	80	1	0	0
ESTNV_32366_632	G	80	1	0	0
ESTNV_29209_356	A	33	0.4125	0.00277734	0.0527005
ESTNV_29209_356	G	47	0.5875	0.00277734	0.0527005
ESTNV_36510_599	A	20	0.25	0.0028125	0.053033
ESTNV_36510_599	G	60	0.75	0.0028125	0.053033
ESTV_15688_494	A	22	0.275	0.00279687	0.0528855
ESTV_15688_494	G	58	0.725	0.00279687	0.0528855
ESTNV_30757_471	G	80	1	0	0
GCR_cBin3256_Ctg1_63	A	80	1	0	0
GCR_cBin836_Ctg1_394	A	5	0.0625	0.000996094	0.031561
GCR_cBin836_Ctg1_394	C	75	0.9375	0.000996094	0.031561
ESTNV_35640_75	C	56	0.7	0.00275	0.0524404
ESTNV_35640_75	G	24	0.3	0.00275	0.0524404
GCR_cBin48467_Ctg1_35	C	80	1	0	0
ESTNV_23431_381	A	49	0.6125	0.00327734	0.0572481
ESTNV_23431_381	G	31	0.3875	0.00327734	0.0572481
ESTNV_37039_99	A	80	1	0	0
GCR_cBin1859_Ctg1_276	G	80	1	0	0
GCR_cBin11134_Ctg1_164	G	80	1	0	0
GCR_cBin11134_Ctg1_43	G	80	1	0	0
GCR_cBin4983_Ctg1_416	A	80	1	0	0
GCR_cBin18961_Ctg1_75	C	69	0.8625	0.00124609	0.0353001
GCR_cBin18961_Ctg1_75	G	11	0.1375	0.00124609	0.0353001
ESTV_8181_51	A	10	0.128205	0.00122221	0.0349601
ESTV_8181_51	G	68	0.871795	0.00122221	0.0349601
ESTNV_26621_493	A	80	1	0	0
ESTNV_23711_205	A	80	1	0	0
ESTV_17538_85	A	67	0.8375	0.00168359	0.0410316
ESTV_17538_85	G	13	0.1625	0.00168359	0.0410316
GCR_cBin2733_Ctg1_528	A	67	0.8375	0.00168359	0.0410316
GCR_cBin2733_Ctg1_528	G	13	0.1625	0.00168359	0.0410316
ESTNV_33243_1092	A	80	1	0	0
ESTNV_25889_239	A	80	1	0	0
ESTNV_33243_235	A	80	1	0	0
GCR_cBin32739_Ctg1_78	A	70	0.875	0.00148438	0.0385276
GCR_cBin32739_Ctg1_78	G	10	0.125	0.00148438	0.0385276
ESTNV_29403_553	A	53	0.6625	0.00293359	0.0541627
ESTNV_29403_553	G	27	0.3375	0.00293359	0.0541627
GCR_cBin25248_Ctg1_228	C	80	1	0	0
ESTNV_34987_849	A	2	0.025	0.000296875	0.0172301
ESTNV_34987_849	C	78	0.975	0.000296875	0.0172301
ESTNV_34987_996	A	2	0.025	0.000296875	0.0172301
ESTNV_34987_996	G	78	0.975	0.000296875	0.0172301
GCR_cBin6804_Ctg1_170	A	34	0.425	0.00298438	0.0546294
GCR_cBin6804_Ctg1_170	C	46	0.575	0.00298438	0.0546294
ESTNV_27342_254	A	26	0.325	0.00267188	0.0516902
ESTNV_27342_254	G	54	0.675	0.00267188	0.0516902
ESTV_16240_204	G	80	1	0	0
GCR_cBin29831_Ctg1_68	C	17	0.2125	0.00183984	0.0428934
GCR_cBin29831_Ctg1_68	G	63	0.7875	0.00183984	0.0428934
ESTNV_32051_1570	A	63	0.7875	0.00183984	0.0428934
ESTNV_32051_1570	G	17	0.2125	0.00183984	0.0428934
BASS13_B7_B07_761	G	80	1	0	0
GCR_cBin28152_Ctg1_60	A	80	1	0	0
GCR_cBin28152_Ctg1_185	A	80	1	0	0
GCR_cBin14203_Ctg1_147	C	80	1	0	0
GCR_cBin15266_Ctg1_58	A	49	0.6125	0.00358984	0.0599153
GCR_cBin15266_Ctg1_58	G	31	0.3875	0.00358984	0.0599153
GCR_cBin6804_Ctg1_99	A	34	0.425	0.00298438	0.0546294
GCR_cBin6804_Ctg1_99	G	46	0.575	0.00298438	0.0546294
GCR_cBin24972_Ctg1_42	G	80	1	0	0
GCR_cBin31996_Ctg1_226	A	66	0.868421	0.0012757	0.0357169
GCR_cBin31996_Ctg1_226	T	10	0.131579	0.0012757	0.0357169
GCR_cBin31996_Ctg1_169	A	68	0.85	0.0013125	0.0362284
GCR_cBin31996_Ctg1_169	G	12	0.15	0.0013125	0.0362284
GCR_cBin34406_Ctg1_88	A	80	1	0	0
GCR_cBin43448_Ctg1_152	C	80	1	0	0
ESTNV_32001_1134	A	80	1	0	0
GCR_hBin13605_Ctg1_93	A	80	1	0	0
GCR_cBin20942_Ctg1_68	A	26	0.325	0.00329687	0.0574184
GCR_cBin20942_Ctg1_68	C	54	0.675	0.00329687	0.0574184
GCR_cBin49210_Ctg1_198	G	80	1	0	0
GCR_cBin20942_Ctg1_63	A	54	0.675	0.00329687	0.0574184
GCR_cBin20942_Ctg1_63	C	26	0.325	0.00329687	0.0574184
GCR_cBin7112_Ctg1_397	A	80	1	0	0
GCR_cBin37669_Ctg1_32	G	80	1	0	0
ESTNV_34868_337	C	80	1	0	0
ESTNV_22661_681	G	80	1	0	0
GCR_cBin27851_Ctg1_509	T	80	1	0	0
GCR_cBin27851_Ctg1_590	G	80	1	0	0
ESTNV_30354_106	A	64	0.8	0.0015	0.0387298
ESTNV_30354_106	C	16	0.2	0.0015	0.0387298
ESTNV_30411_506	C	80	1	0	0
ESTNV_33967_1368	A	3	0.0375	0.000433594	0.0208229
ESTNV_33967_1368	G	77	0.9625	0.000433594	0.0208229
GCR_cBin38527_Ctg1_75	C	77	0.9625	0.000433594	0.0208229
GCR_cBin38527_Ctg1_75	G	3	0.0375	0.000433594	0.0208229
ESTNV_33967_1551	A	80	1	0	0
GCR_cBin3280_Ctg1_169	A	56	0.7	0.0024375	0.049371
GCR_cBin3280_Ctg1_169	C	24	0.3	0.0024375	0.049371
ESTV_15445_193	A	21	0.2625	0.00218359	0.0467289
ESTV_15445_193	G	59	0.7375	0.00218359	0.0467289
GCR_cBin3280_Ctg1_135	A	21	0.2625	0.00249609	0.0499609
GCR_cBin3280_Ctg1_135	G	59	0.7375	0.00249609	0.0499609
ESTV_12252_166	G	80	1	0	0
GCR_cBin37519_Ctg1_244	A	27	0.3375	0.00262109	0.0511966
GCR_cBin37519_Ctg1_244	C	53	0.6625	0.00262109	0.0511966
ESTNV_35410_1102	C	33	0.4125	0.00246484	0.0496472
ESTNV_35410_1102	G	47	0.5875	0.00246484	0.0496472
ESTNV_37136_732	A	30	0.375	0.00304688	0.0551985
ESTNV_37136_732	G	50	0.625	0.00304688	0.0551985
GCR_cBin8284_Ctg1_213	C	36	0.45	0.002125	0.0460977
GCR_cBin8284_Ctg1_213	G	44	0.55	0.002125	0.0460977
GCR_cBin5316_Ctg2_193	A	80	1	0	0
GCR_cBin45701_Ctg1_227	A	65	0.8125	0.00177734	0.0421586
GCR_cBin45701_Ctg1_227	G	15	0.1875	0.00177734	0.0421586
ESTNV_31893_467	A	39	0.5	0.00295858	0.0543928
ESTNV_31893_467	G	39	0.5	0.00295858	0.0543928
ESTNV_31893_226	A	80	1	0	0
GCR_cBin16365_Ctg1_475	A	58	0.725	0.00248438	0.0498435
GCR_cBin16365_Ctg1_475	C	22	0.275	0.00248438	0.0498435
ESTV_21702_136	A	80	1	0	0
ESTV_16902_235	A	57	0.7125	0.00246484	0.0496472
ESTV_16902_235	C	23	0.2875	0.00246484	0.0496472
ESTNV_36697_1478	A	74	0.925	0.000796875	0.028229
ESTNV_36697_1478	G	6	0.075	0.000796875	0.028229
GCR_cBin26271_Ctg1_32	A	80	1	0	0
ESTNV_33477_1310	G	80	1	0	0
GCR_cBin17329_Ctg2_166	A	80	1	0	0
GCR_hBin21648_Ctg1_137	A	80	1	0	0
ESTV_21377_436	A	38	0.475	0.00373437	0.0611095
ESTV_21377_436	T	42	0.525	0.00373437	0.0611095
GCR_cBin12401_Ctg1_186	A	77	0.9625	0.000746094	0.0273147
GCR_cBin12401_Ctg1_186	G	3	0.0375	0.000746094	0.0273147
GCR_cBin1955_Ctg1_60	A	9	0.1125	0.00108984	0.0330128
GCR_cBin1955_Ctg1_60	G	71	0.8875	0.00108984	0.0330128
GCR_cBin30689_Ctg1_25	A	28	0.35	0.0025625	0.0506211
GCR_cBin30689_Ctg1_25	T	52	0.65	0.0025625	0.0506211
ESTNV_36095_1044	C	80	1	0	0
GCR_cBin43112_Ctg1_86	A	10	0.125	0.00179688	0.0423896
GCR_cBin43112_Ctg1_86	G	70	0.875	0.00179688	0.0423896
ESTNV_36751_1595	A	46	0.575	0.00392188	0.0626249
ESTNV_36751_1595	G	34	0.425	0.00392188	0.0626249
GCR_cBin22374_Ctg1_508	A	37	0.4625	0.00418359	0.0646807
GCR_cBin22374_Ctg1_508	G	43	0.5375	0.00418359	0.0646807
ESTNV_19996_365	A	46	0.575	0.00360938	0.0600781
ESTNV_19996_365	G	34	0.425	0.00360938	0.0600781
ESTNV_36998_1021	A	62	0.775	0.00217188	0.0466034
ESTNV_36998_1021	G	18	0.225	0.00217188	0.0466034
ESTNV_36516_128	C	78	0.975	0.000296875	0.0172301
ESTNV_36516_128	G	2	0.025	0.000296875	0.0172301
GCR_cBin14440_Ctg1_49	A	80	1	0	0
GCR_cBin3627_Ctg1_142	C	80	1	0	0
BASS113_B7_G12_644	A	16	0.2	0.0024375	0.049371
BASS113_B7_G12_644	G	64	0.8	0.0024375	0.049371
ESTNV_32044_621	A	61	0.7625	0.00280859	0.0529962
ESTNV_32044_621	G	19	0.2375	0.00280859	0.0529962
GCR_cBin52996_Ctg1_137	A	5	0.0625	0.000683594	0.0261456
GCR_cBin52996_Ctg1_137	G	75	0.9375	0.000683594	0.0261456
GCR_cBin21125_Ctg1_53	A	13	0.1625	0.00168359	0.0410316
GCR_cBin21125_Ctg1_53	C	67	0.8375	0.00168359	0.0410316
GCR_cBin13800_Ctg1_159	G	80	1	0	0
ESTNV_29541_872	A	80	1	0	0
ESTNV_29541_288	A	80	1	0	0
GCR_cBin28164_Ctg1_223	A	80	1	0	0
ESTNV_29967_108	G	80	1	0	0
GCR_cBin8926_Ctg1_226	G	80	1	0	0
ESTNV_33458_777	A	35	0.4375	0.00318359	0.0564233
ESTNV_33458_777	G	45	0.5625	0.00318359	0.0564233
ESTNV_27886_813	A	28	0.35	0.002875	0.053619
ESTNV_27886_813	G	52	0.65	0.002875	0.053619
GCR_hBin27145_Ctg1_110	G	80	1	0	0
ESTNV_33232_155	C	80	1	0	0
ESTNV_24376_271	A	8	0.1	0.001	0.0316228
ESTNV_24376_271	G	72	0.9	0.001	0.0316228
ESTNV_35394_1479	G	80	1	0	0
GCR_cBin31631_Ctg1_149	C	80	1	0	0
ESTNV_31107_540	A	1	0.0125	0.000152344	0.0123428
ESTNV_31107_540	C	79	0.9875	0.000152344	0.0123428
GCR_cBin16342_Ctg1_468	A	72	0.9	0.001	0.0316228
GCR_cBin16342_Ctg1_468	G	8	0.1	0.001	0.0316228
ESTV_19947_986	C	37	0.4625	0.00293359	0.0541627
ESTV_19947_986	G	43	0.5375	0.00293359	0.0541627
ESTNV_35822_817	A	35	0.4375	0.00255859	0.0505825
ESTNV_35822_817	G	45	0.5625	0.00255859	0.0505825
GCR_cBin6974_Ctg1_77	A	7	0.0875	0.00121484	0.0348546
GCR_cBin6974_Ctg1_77	G	73	0.9125	0.00121484	0.0348546
GCR_cBin27619_Ctg1_193	A	24	0.3	0.0036875	0.0607248
GCR_cBin27619_Ctg1_193	G	56	0.7	0.0036875	0.0607248
GCR_cBin15029_Ctg1_250	C	2	0.025	0.000296875	0.0172301
GCR_cBin15029_Ctg1_250	G	78	0.975	0.000296875	0.0172301
GCR_cBin2599_Ctg1_262	A	59	0.7375	0.00249609	0.0499609
GCR_cBin2599_Ctg1_262	T	21	0.2625	0.00249609	0.0499609
ESTNV_24613_246	A	77	0.9625	0.000433594	0.0208229
ESTNV_24613_246	C	3	0.0375	0.000433594	0.0208229
ESTNV_29500_554	A	8	0.1	0.001	0.0316228
ESTNV_29500_554	C	72	0.9	0.001	0.0316228
ESTV_16239_605	C	42	0.525	0.00279687	0.0528855
ESTV_16239_605	G	38	0.475	0.00279687	0.0528855
ESTV_16905_208	A	2	0.025	0.000296875	0.0172301
ESTV_16905_208	G	78	0.975	0.000296875	0.0172301
GCR_cBin283_Ctg1_120	A	30	0.375	0.00242187	0.0492125
GCR_cBin283_Ctg1_120	T	50	0.625	0.00242187	0.0492125
ESTNV_34118_596	A	80	1	0	0
ESTNV_16766_113	A	49	0.6125	0.00233984	0.0483719
ESTNV_16766_113	T	31	0.3875	0.00233984	0.0483719
ESTNV_34068_665	A	40	0.5	0.0034375	0.0586302
ESTNV_34068_665	G	40	0.5	0.0034375	0.0586302
ESTNV_34451_135	A	67	0.8375	0.00137109	0.0370283
ESTNV_34451_135	G	13	0.1625	0.00137109	0.0370283
ESTNV_28701_207	A	38	0.513514	0.00273429	0.0522904
ESTNV_28701_207	C	36	0.486486	0.00273429	0.0522904
GCR_cBin1755_Ctg1_224	A	44	0.55	0.00275	0.0524404
GCR_cBin1755_Ctg1_224	G	36	0.45	0.00275	0.0524404
GCR_hBin32129_Ctg1_119	A	33	0.4125	0.00308984	0.0555864
GCR_hBin32129_Ctg1_119	C	47	0.5875	0.00308984	0.0555864
GCR_cBin1603_Ctg1_67	A	10	0.125	0.00148438	0.0385276
GCR_cBin1603_Ctg1_67	G	70	0.875	0.00148438	0.0385276
GCR_cBin20843_Ctg1_110	G	80	1	0	0
ESTV_21966_300	A	80	1	0	0
ESTNV_29234_195	A	31	0.3875	0.00265234	0.0515009
ESTNV_29234_195	C	49	0.6125	0.00265234	0.0515009
ESTV_18152_336	A	80	1	0	0
ESTNV_29391_150	A	80	1	0	0
GCR_cBin41648_Ctg1_124	A	80	1	0	0
ESTV_16288_295	G	80	1	0	0
ESTV_17470_405	G	80	1	0	0
ESTV_17405_76	C	76	0.95	0.0005625	0.0237171
ESTV_17405_76	G	4	0.05	0.0005625	0.0237171
ESTNV_32552_113	C	80	1	0	0
ESTNV_34925_2923	G	80	1	0	0
ESTNV_23083_64	A	3	0.0375	0.000433594	0.0208229
ESTNV_23083_64	G	77	0.9625	0.000433594	0.0208229
GCR_cBin22452_Ctg1_155	A	77	0.9625	0.000433594	0.0208229
GCR_cBin22452_Ctg1_155	C	3	0.0375	0.000433594	0.0208229
GCR_cBin22452_Ctg1_142	A	77	0.9625	0.000433594	0.0208229
GCR_cBin22452_Ctg1_142	G	3	0.0375	0.000433594	0.0208229
ESTNV_37675_1953	A	80	1	0	0
ESTNV_35592_1024	A	80	1	0	0
BASS118_B7_B11_507	G	80	1	0	0
ESTNV_36582_634	G	80	1	0	0
ESTNV_28584_983	A	80	1	0	0
ESTNV_32001_1243	G	80	1	0	0
ESTNV_26671_385	A	80	1	0	0
GCR_cBin1134_Ctg1_360	A	8	0.1	0.001	0.0316228
GCR_cBin1134_Ctg1_360	G	72	0.9	0.001	0.0316228
BASS118_B7_B11_702	G	80	1	0	0
ESTNV_31895_1189	C	80	1	0	0
GCR_cBin50373_Ctg1_78	A	72	0.9	0.001	0.0316228
GCR_cBin50373_Ctg1_78	C	8	0.1	0.001	0.0316228
ESTNV_27544_95	C	80	1	0	0
ESTNV_31140_226	A	34	0.425	0.00298438	0.0546294
ESTNV_31140_226	C	46	0.575	0.00298438	0.0546294
ESTNV_31438_51	A	80	1	0	0
ESTNV_32228_633	A	3	0.0375	0.000433594	0.0208229
ESTNV_32228_633	G	77	0.9625	0.000433594	0.0208229
GCR_cBin14555_Ctg1_93	A	80	1	0	0
GCR_cBin42832_Ctg1_109	A	78	0.975	0.000296875	0.0172301
GCR_cBin42832_Ctg1_109	T	2	0.025	0.000296875	0.0172301
GCR_cBin37379_Ctg1_47	A	75	0.9375	0.000683594	0.0261456
GCR_cBin37379_Ctg1_47	C	5	0.0625	0.000683594	0.0261456
ESTV_18493_1052	A	5	0.0641026	0.000716465	0.0267669
ESTV_18493_1052	G	73	0.935897	0.000716465	0.0267669
ESTNV_34763_1056	A	58	0.783784	0.00202357	0.0449841
ESTNV_34763_1056	T	16	0.216216	0.00202357	0.0449841
ESTNV_34763_2153	A	13	0.1625	0.00137109	0.0370283
ESTNV_34763_2153	C	67	0.8375	0.00137109	0.0370283
GCR_cBin19457_Ctg1_45	A	8	0.1	0.001	0.0316228
GCR_cBin19457_Ctg1_45	G	72	0.9	0.001	0.0316228
GCR_cBin528_Ctg1_496	A	61	0.7625	0.00187109	0.0432561
GCR_cBin528_Ctg1_496	G	19	0.2375	0.00187109	0.0432561
ESTNV_34964_301	A	80	1	0	0
GCR_rBin1448_Ctg1_97	G	80	1	0	0
GCR_rBin3760_Ctg1_98	G	80	1	0	0
GCR_cBin8933_Ctg1_66	C	80	1	0	0
GCR_cBin18827_Ctg1_195	C	80	1	0	0
GCR_cBin46701_Ctg1_110	A	80	1	0	0
ESTNV_34158_505	A	1	0.0125	0.000152344	0.0123428
ESTNV_34158_505	G	79	0.9875	0.000152344	0.0123428
GCR_cBin15768_Ctg1_57	A	31	0.397436	0.00334631	0.0578473
GCR_cBin15768_Ctg1_57	G	47	0.602564	0.00334631	0.0578473
GCR_cBin39368_Ctg1_207	A	42	0.525	0.00310938	0.0557618
GCR_cBin39368_Ctg1_207	C	38	0.475	0.00310938	0.0557618
ESTNV_35436_232	A	19	0.256757	0.00278365	0.0527603
ESTNV_35436_232	T	55	0.743243	0.00278365	0.0527603
ESTNV_33063_792	A	14	0.175	0.00142187	0.0377078
ESTNV_33063_792	G	66	0.825	0.00142187	0.0377078
GCR_cBin2200_Ctg1_90	A	2	0.025	0.000296875	0.0172301
GCR_cBin2200_Ctg1_90	G	78	0.975	0.000296875	0.0172301
ESTNV_23390_339	A	14	0.175	0.00142187	0.0377078
ESTNV_23390_339	C	66	0.825	0.00142187	0.0377078
GCR_cBin5359_Ctg1_235	A	66	0.825	0.00142187	0.0377078
GCR_cBin5359_Ctg1_235	C	14	0.175	0.00142187	0.0377078
ESTNV_19861_125	A	14	0.175	0.00142187	0.0377078
ESTNV_19861_125	G	66	0.825	0.00142187	0.0377078
GCR_hBin33809_Ctg1_106	A	14	0.175	0.00142187	0.0377078
GCR_hBin33809_Ctg1_106	G	66	0.825	0.00142187	0.0377078
ESTNV_36266_544	A	80	1	0	0
GCR_rBin3608_Ctg1_274	G	80	1	0	0
ESTNV_27444_1104	A	10	0.125	0.00117187	0.0342327
ESTNV_27444_1104	G	70	0.875	0.00117187	0.0342327
GCR_cBin50404_Ctg1_127	A	1	0.0125	0.000152344	0.0123428
GCR_cBin50404_Ctg1_127	C	79	0.9875	0.000152344	0.0123428
ESTNV_33311_572	A	78	0.975	0.000296875	0.0172301
ESTNV_33311_572	T	2	0.025	0.000296875	0.0172301
GCR_cBin38289_Ctg1_239	A	37	0.4625	0.00262109	0.0511966
GCR_cBin38289_Ctg1_239	G	43	0.5375	0.00262109	0.0511966
GCR_cBin52665_Ctg1_33	A	78	0.975	0.000296875	0.0172301
GCR_cBin52665_Ctg1_33	C	2	0.025	0.000296875	0.0172301
GCR_cBin6541_Ctg1_187	A	8	0.1	0.001	0.0316228
GCR_cBin6541_Ctg1_187	G	72	0.9	0.001	0.0316228
ESTNV_23136_481	A	37	0.4625	0.00262109	0.0511966
ESTNV_23136_481	C	43	0.5375	0.00262109	0.0511966
ESTNV_29410_233	G	80	1	0	0
ESTNV_37581_1182	G	80	1	0	0
ESTV_16551_148	A	80	1	0	0
ESTV_16551_442	A	20	0.25	0.0021875	0.0467707
ESTV_16551_442	G	60	0.75	0.0021875	0.0467707
ESTNV_31278_125	A	72	0.9	0.001	0.0316228
ESTNV_31278_125	C	8	0.1	0.001	0.0316228
ESTNV_13016_93	A	72	0.9	0.001	0.0316228
ESTNV_13016_93	G	8	0.1	0.001	0.0316228
GCR_cBin6788_Ctg1_156	G	80	1	0	0
GCR_cBin25229_Ctg2_105	T	80	1	0	0
ESTV_15804_172	G	80	1	0	0
GCR_cBin50289_Ctg1_55	C	64	0.8	0.0015	0.0387298
GCR_cBin50289_Ctg1_55	G	16	0.2	0.0015	0.0387298
ESTNV_27780_352	A	80	1	0	0
GCR_cBin735_Ctg2_314	C	48	0.6	0.004125	0.0642262
GCR_cBin735_Ctg2_314	G	32	0.4	0.004125	0.0642262
GCR_cBin5772_Ctg1_288	A	48	0.6	0.004125	0.0642262
GCR_cBin5772_Ctg1_288	C	32	0.4	0.004125	0.0642262
GCR_cBin28548_Ctg1_73	A	32	0.4	0.004125	0.0642262
GCR_cBin28548_Ctg1_73	G	48	0.6	0.004125	0.0642262
GCR_cBin5772_Ctg1_84	A	32	0.4	0.004125	0.0642262
GCR_cBin5772_Ctg1_84	G	48	0.6	0.004125	0.0642262
ESTNV_30491_362	A	10	0.125	0.00117187	0.0342327
ESTNV_30491_362	G	70	0.875	0.00117187	0.0342327
ESTNV_16613_137	G	80	1	0	0
ESTNV_13258_439	A	26	0.342105	0.00349905	0.0591528
ESTNV_13258_439	C	50	0.657895	0.00349905	0.0591528
GCR_cBin44221_Ctg1_78	A	2	0.025	0.000296875	0.0172301
GCR_cBin44221_Ctg1_78	G	78	0.975	0.000296875	0.0172301
ESTNV_26616_500	A	65	0.8125	0.00146484	0.0382733
ESTNV_26616_500	G	15	0.1875	0.00146484	0.0382733
ESTNV_31519_569	A	69	0.8625	0.00124609	0.0353001
ESTNV_31519_569	G	11	0.1375	0.00124609	0.0353001
ESTNV_31661_274	G	80	1	0	0
ESTV_14738_303	A	80	1	0	0
ESTV_13534_158	C	79	0.9875	0.000152344	0.0123428
ESTV_13534_158	G	1	0.0125	0.000152344	0.0123428
GCR_cBin34971_Ctg1_240	A	64	0.8	0.0018125	0.0425735
GCR_cBin34971_Ctg1_240	C	16	0.2	0.0018125	0.0425735
ESTNV_28965_1177	A	3	0.0375	0.000746094	0.0273147
ESTNV_28965_1177	C	77	0.9625	0.000746094	0.0273147
GCR_cBin34971_Ctg1_217	A	16	0.2	0.0018125	0.0425735
GCR_cBin34971_Ctg1_217	G	64	0.8	0.0018125	0.0425735
GCR_cBin16135_Ctg1_203	T	80	1	0	0
GCR_cBin12267_Ctg1_160	A	31	0.407895	0.00271997	0.0521533
GCR_cBin12267_Ctg1_160	G	45	0.592105	0.00271997	0.0521533
GCR_cBin12267_Ctg1_307	A	57	0.7125	0.00246484	0.0496472
GCR_cBin12267_Ctg1_307	C	23	0.2875	0.00246484	0.0496472
GCR_cBin25322_Ctg1_126	A	57	0.7125	0.00246484	0.0496472
GCR_cBin25322_Ctg1_126	G	23	0.2875	0.00246484	0.0496472
ESTNV_32152_893	A	80	1	0	0
GCR_cBin34913_Ctg1_140	T	80	1	0	0
GCR_cBin34913_Ctg1_142	G	78	1	0	0
GCR_cBin34172_Ctg1_109	A	58	0.725	0.00185937	0.0431205
GCR_cBin34172_Ctg1_109	C	22	0.275	0.00185937	0.0431205
GCR_cBin25879_Ctg1_163	A	25	0.3125	0.00240234	0.0490137
GCR_cBin25879_Ctg1_163	C	55	0.6875	0.00240234	0.0490137
GCR_cBin30260_Ctg1_67	C	80	1	0	0
BASS12_B7_B06_623	A	51	0.6375	0.00312109	0.0558667
BASS12_B7_B06_623	C	29	0.3625	0.00312109	0.0558667
BASS12_B7_B06_1050	A	51	0.6375	0.00312109	0.0558667
BASS12_B7_B06_1050	G	29	0.3625	0.00312109	0.0558667
ESTNV_31974_783	A	79	0.9875	0.000152344	0.0123428
ESTNV_31974_783	C	1	0.0125	0.000152344	0.0123428
ESTNV_32253_402	A	55	0.6875	0.00365234	0.0604346
ESTNV_32253_402	C	25	0.3125	0.00365234	0.0604346
ESTNV_33590_151	C	25	0.3125	0.00365234	0.0604346
ESTNV_33590_151	G	55	0.6875	0.00365234	0.0604346
GCR_cBin6568_Ctg1_186	A	35	0.4375	0.00380859	0.0617138
GCR_cBin6568_Ctg1_186	C	45	0.5625	0.00380859	0.0617138
GCR_cBin13876_Ctg1_149	A	80	1	0	0
ESTNV_34575_1979	A	2	0.025	0.000296875	0.0172301
ESTNV_34575_1979	G	78	0.975	0.000296875	0.0172301
ESTNV_35937_1368	A	48	0.6	0.002875	0.053619
ESTNV_35937_1368	G	32	0.4	0.002875	0.053619
GCR_cBin8095_Ctg1_103	A	80	1	0	0
ESTNV_35094_1383	A	80	1	0	0
GCR_cBin4931_Ctg1_21	A	80	1	0	0
ESTNV_35536_1238	A	68	0.85	0.0013125	0.0362284
ESTNV_35536_1238	G	12	0.15	0.0013125	0.0362284
ESTNV_26812_369	A	76	0.95	0.0005625	0.0237171
ESTNV_26812_369	C	4	0.05	0.0005625	0.0237171
GCR_cBin33361_Ctg1_258	G	80	1	0	0
GCR_cBin5954_Ctg2_568	A	63	0.7875	0.00215234	0.0463934
GCR_cBin5954_Ctg2_568	G	17	0.2125	0.00215234	0.0463934
ESTV_17458_1031	A	71	0.8875	0.00108984	0.0330128
ESTV_17458_1031	G	9	0.1125	0.00108984	0.0330128
ESTNV_26812_629	G	80	1	0	0
GCR_cBin8426_Ctg1_154	A	38	0.475	0.00404688	0.0636151
GCR_cBin8426_Ctg1_154	C	42	0.525	0.00404688	0.0636151
GCR_cBin8426_Ctg1_200	A	42	0.525	0.00404688	0.0636151
GCR_cBin8426_Ctg1_200	C	38	0.475	0.00404688	0.0636151
GCR_cBin22215_Ctg1_184	C	42	0.525	0.00404688	0.0636151
GCR_cBin22215_Ctg1_184	G	38	0.475	0.00404688	0.0636151
GCR_cBin25891_Ctg1_305	A	77	0.9625	0.000433594	0.0208229
GCR_cBin25891_Ctg1_305	C	3	0.0375	0.000433594	0.0208229
GCR_cBin10801_Ctg1_300	T	80	1	0	0
ESTNV_32268_419	G	80	1	0	0
ESTNV_28460_586	T	80	1	0	0
GCR_cBin7903_Ctg1_574	C	80	1	0	0
ESTNV_37373_1395	A	1	0.0125	0.000152344	0.0123428
ESTNV_37373_1395	G	79	0.9875	0.000152344	0.0123428
ESTNV_30312_1019	C	59	0.7375	0.00218359	0.0467289
ESTNV_30312_1019	G	21	0.2625	0.00218359	0.0467289
ESTNV_37123_898	A	72	0.923077	0.000834471	0.0288872
ESTNV_37123_898	G	6	0.0769231	0.000834471	0.0288872
ESTNV_19653_283	A	4	0.05	0.0005625	0.0237171
ESTNV_19653_283	G	76	0.95	0.0005625	0.0237171
ESTNV_37153_794	A	75	0.9375	0.000683594	0.0261456
ESTNV_37153_794	G	5	0.0625	0.000683594	0.0261456
ESTNV_19668_192	C	70	0.875	0.00179688	0.0423896
ESTNV_19668_192	G	10	0.125	0.00179688	0.0423896
GCR_cBin41593_Ctg1_194	C	78	1	0	0
GCR_cBin25388_Ctg1_108	A	78	0.975	0.000296875	0.0172301
GCR_cBin25388_Ctg1_108	C	2	0.025	0.000296875	0.0172301
GCR_cBin25388_Ctg1_170	A	78	0.975	0.000296875	0.0172301
GCR_cBin25388_Ctg1_170	T	2	0.025	0.000296875	0.0172301
ESTNV_33983_368	A	17	0.2125	0.00246484	0.0496472
ESTNV_33983_368	G	63	0.7875	0.00246484	0.0496472
ESTNV_33983_223	G	80	1	0	0
ESTV_15373_465	G	80	1	0	0
ESTV_20583_309	C	80	1	0	0
ESTNV_37479_1245	A	10	0.125	0.00148438	0.0385276
ESTNV_37479_1245	T	70	0.875	0.00148438	0.0385276
ESTNV_36072_124	A	22	0.275	0.00279687	0.0528855
ESTNV_36072_124	G	58	0.725	0.00279687	0.0528855
ESTNV_30452_1210	A	10	0.125	0.00148438	0.0385276
ESTNV_30452_1210	C	70	0.875	0.00148438	0.0385276
ESTNV_36704_1199	G	80	1	0	0
GCR_cBin15414_Ctg1_275	A	58	0.725	0.00279687	0.0528855
GCR_cBin15414_Ctg1_275	G	22	0.275	0.00279687	0.0528855
ESTV_21022_166	A	58	0.725	0.00279687	0.0528855
ESTV_21022_166	C	22	0.275	0.00279687	0.0528855
GCR_cBin16057_Ctg1_166	A	44	0.55	0.0030625	0.0553399
GCR_cBin16057_Ctg1_166	G	36	0.45	0.0030625	0.0553399
GCR_cBin16057_Ctg1_199	A	44	0.55	0.0030625	0.0553399
GCR_cBin16057_Ctg1_199	G	36	0.45	0.0030625	0.0553399
GCR_cBin531_Ctg1_115	A	80	1	0	0
GCR_cBin36646_Ctg1_99	A	54	0.675	0.00329687	0.0574184
GCR_cBin36646_Ctg1_99	C	26	0.325	0.00329687	0.0574184
GCR_cBin43234_Ctg1_170	A	26	0.333333	0.00339689	0.0582828
GCR_cBin43234_Ctg1_170	G	52	0.666667	0.00339689	0.0582828
GCR_cBin36646_Ctg1_106	A	26	0.325	0.00329687	0.0574184
GCR_cBin36646_Ctg1_106	T	54	0.675	0.00329687	0.0574184
GCR_cBin8483_Ctg1_179	A	80	1	0	0
GCR_cBin8483_Ctg1_168	C	80	1	0	0
GCR_cBin36902_Ctg1_70	A	30	0.375	0.00179688	0.0423896
GCR_cBin36902_Ctg1_70	T	50	0.625	0.00179688	0.0423896
GCR_cBin22155_Ctg1_66	A	26	0.325	0.00235937	0.0485734
GCR_cBin22155_Ctg1_66	G	54	0.675	0.00235937	0.0485734
GCR_cBin22155_Ctg1_21	A	23	0.310811	0.00268493	0.0518164
GCR_cBin22155_Ctg1_21	G	51	0.689189	0.00268493	0.0518164
ESTV_21093_430	G	80	1	0	0
GCR_cBin4378_Ctg1_115	A	1	0.0125	0.000152344	0.0123428
GCR_cBin4378_Ctg1_115	G	79	0.9875	0.000152344	0.0123428
GCR_cBin15199_Ctg1_186	A	24	0.3	0.0030625	0.0553399
GCR_cBin15199_Ctg1_186	G	56	0.7	0.0030625	0.0553399
ESTNV_32124_500	A	29	0.3625	0.00280859	0.0529962
ESTNV_32124_500	G	51	0.6375	0.00280859	0.0529962
ESTNV_36871_194	C	40	0.5	0.0034375	0.0586302
ESTNV_36871_194	G	40	0.5	0.0034375	0.0586302
GCR_cBin17984_Ctg1_90	A	80	1	0	0
ESTNV_36871_453	A	72	0.9	0.001	0.0316228
ESTNV_36871_453	C	8	0.1	0.001	0.0316228
ESTNV_36871_663	A	72	0.9	0.001	0.0316228
ESTNV_36871_663	C	8	0.1	0.001	0.0316228
ESTV_10747_366	A	25	0.3125	0.00240234	0.0490137
ESTV_10747_366	G	55	0.6875	0.00240234	0.0490137
ESTNV_31289_1032	A	80	1	0	0
ESTNV_35334_747	A	19	0.2375	0.00218359	0.0467289
ESTNV_35334_747	C	61	0.7625	0.00218359	0.0467289
ESTNV_35334_1410	A	19	0.2375	0.00218359	0.0467289
ESTNV_35334_1410	G	61	0.7625	0.00218359	0.0467289
ESTNV_19071_457	C	80	1	0	0
ESTNV_29283_367	A	48	0.6	0.002875	0.053619
ESTNV_29283_367	G	32	0.4	0.002875	0.053619
GCR_cBin11404_Ctg1_50	C	50	0.625	0.00304688	0.0551985
GCR_cBin11404_Ctg1_50	G	30	0.375	0.00304688	0.0551985
ESTNV_22983_475	A	75	0.9375	0.000683594	0.0261456
ESTNV_22983_475	T	5	0.0625	0.000683594	0.0261456
GCR_cBin9116_Ctg1_146	A	77	0.9625	0.000433594	0.0208229
GCR_cBin9116_Ctg1_146	G	3	0.0375	0.000433594	0.0208229
GCR_cBin9116_Ctg1_67	A	3	0.0375	0.000433594	0.0208229
GCR_cBin9116_Ctg1_67	C	77	0.9625	0.000433594	0.0208229
GCR_cBin30245_Ctg1_84	A	80	1	0	0
ESTNV_35215_1505	A	2	0.025	0.000296875	0.0172301
ESTNV_35215_1505	G	78	0.975	0.000296875	0.0172301
GCR_cBin780_Ctg1_144	A	64	0.8	0.00275	0.0524404
GCR_cBin780_Ctg1_144	G	16	0.2	0.00275	0.0524404
ESTNV_29224_109	A	73	0.9125	0.000902344	0.030039
ESTNV_29224_109	G	7	0.0875	0.000902344	0.030039
GCR_cBin17160_Ctg1_108	A	80	1	0	0
GCR_cBin2785_Ctg1_206	C	80	1	0	0
GCR_cBin20352_Ctg1_163	A	66	0.825	0.00173438	0.0416458
GCR_cBin20352_Ctg1_163	G	14	0.175	0.00173438	0.0416458
ESTV_16907_342	A	76	0.95	0.0005625	0.0237171
ESTV_16907_342	G	4	0.05	0.0005625	0.0237171
GCR_cBin9323_Ctg1_78	A	76	0.95	0.0005625	0.0237171
GCR_cBin9323_Ctg1_78	C	4	0.05	0.0005625	0.0237171
GCR_cBin49299_Ctg1_186	A	80	1	0	0
ESTNV_32102_56	A	42	0.525	0.00217188	0.0466034
ESTNV_32102_56	G	38	0.475	0.00217188	0.0466034
ESTV_20256_233	A	80	1	0	0
ESTV_20256_375	A	80	1	0	0
ESTNV_36130_3412	C	80	1	0	0
ESTNV_31896_140	A	66	0.825	0.00204688	0.0452424
ESTNV_31896_140	C	14	0.175	0.00204688	0.0452424
ESTNV_31896_408	A	14	0.175	0.00204688	0.0452424
ESTNV_31896_408	G	66	0.825	0.00204688	0.0452424
GCR_cBin15418_Ctg1_123	G	80	1	0	0
ESTNV_24505_142	C	80	1	0	0
ESTNV_36717_1690	G	80	1	0	0
GCR_cBin38330_Ctg1_135	A	62	0.861111	0.00177898	0.0421779
GCR_cBin38330_Ctg1_135	C	10	0.138889	0.00177898	0.0421779
GCR_cBin332_Ctg1_80	G	80	1	0	0
ESTNV_35205_1428	A	79	0.9875	0.000152344	0.0123428
ESTNV_35205_1428	C	1	0.0125	0.000152344	0.0123428
ESTNV_25127_174	A	21	0.2625	0.00218359	0.0467289
ESTNV_25127_174	T	59	0.7375	0.00218359	0.0467289
ESTNV_35387_1829	A	42	0.525	0.00217188	0.0466034
ESTNV_35387_1829	C	38	0.475	0.00217188	0.0466034
GCR_cBin27124_Ctg1_83	A	9	0.1125	0.00108984	0.0330128
GCR_cBin27124_Ctg1_83	C	71	0.8875	0.00108984	0.0330128
GCR_cBin48578_Ctg1_194	A	36	0.45	0.0024375	0.049371
GCR_cBin48578_Ctg1_194	G	44	0.55	0.0024375	0.049371
GCR_cBin30256_Ctg1_109	A	80	1	0	0
GCR_cBin30256_Ctg1_176	C	80	1	0	0
GCR_cBin30256_Ctg1_74	G	80	1	0	0
GCR_cBin1614_Ctg1_629	A	48	0.6	0.004125	0.0642262
GCR_cBin1614_Ctg1_629	G	32	0.4	0.004125	0.0642262
GCR_cBin2536_Ctg1_238	C	57	0.7125	0.00371484	0.0609495
GCR_cBin2536_Ctg1_238	G	23	0.2875	0.00371484	0.0609495
GCR_cBin1614_Ctg1_237	A	32	0.4	0.004125	0.0642262
GCR_cBin1614_Ctg1_237	C	48	0.6	0.004125	0.0642262
GCR_cBin30250_Ctg1_267	A	48	0.6	0.004125	0.0642262
GCR_cBin30250_Ctg1_267	C	32	0.4	0.004125	0.0642262
GCR_cBin4787_Ctg1_387	A	36	0.45	0.003375	0.0580948
GCR_cBin4787_Ctg1_387	G	44	0.55	0.003375	0.0580948
GCR_cBin33124_Ctg1_35	A	53	0.6625	0.00387109	0.0622181
GCR_cBin33124_Ctg1_35	G	27	0.3375	0.00387109	0.0622181
ESTNV_35077_1676	G	80	1	0	0
GCR_cBin8585_Ctg1_77	G	80	1	0	0
ESTNV_30121_652	A	16	0.2	0.002125	0.0460977
ESTNV_30121_652	G	64	0.8	0.002125	0.0460977
ESTV_21970_586	A	2	0.025	0.000296875	0.0172301
ESTV_21970_586	C	78	0.975	0.000296875	0.0172301
GCR_cBin42759_Ctg1_238	A	80	1	0	0
GCR_cBin30179_Ctg1_191	A	48	0.6	0.0025625	0.0506211
GCR_cBin30179_Ctg1_191	T	32	0.4	0.0025625	0.0506211
ESTV_12578_95	A	80	1	0	0
GCR_cBin8424_Ctg1_31	A	80	1	0	0
ESTNV_26787_1038	A	80	1	0	0
GCR_cBin3322_Ctg1_167	A	80	1	0	0
GCR_cBin3071_Ctg1_51	A	6	0.075	0.000796875	0.028229
GCR_cBin3071_Ctg1_51	G	74	0.925	0.000796875	0.028229
ESTNV_25443_600	A	26	0.325	0.00204688	0.0452424
ESTNV_25443_600	G	54	0.675	0.00204688	0.0452424
GCR_cBin13688_Ctg1_129	A	26	0.325	0.00204688	0.0452424
GCR_cBin13688_Ctg1_129	G	54	0.675	0.00204688	0.0452424
GCR_cBin39943_Ctg1_265	G	80	1	0	0
GCR_cBin23202_Ctg1_93	A	20	0.25	0.0015625	0.0395285
GCR_cBin23202_Ctg1_93	G	60	0.75	0.0015625	0.0395285
ESTNV_31093_1513	A	80	1	0	0
ESTV_13699_319	G	80	1	0	0
ESTNV_28113_144	A	75	0.9375	0.000683594	0.0261456
ESTNV_28113_144	C	5	0.0625	0.000683594	0.0261456
ESTNV_28113_319	A	75	0.9375	0.000683594	0.0261456
ESTNV_28113_319	C	5	0.0625	0.000683594	0.0261456
BASS124_B7_D10_265	A	57	0.7125	0.00246484	0.0496472
BASS124_B7_D10_265	G	23	0.2875	0.00246484	0.0496472
BASS124_B7_D10_722	A	57	0.7125	0.00246484	0.0496472
BASS124_B7_D10_722	C	23	0.2875	0.00246484	0.0496472
GCR_cBin6609_Ctg1_85	C	80	1	0	0
GCR_cBin6609_Ctg1_88	A	80	1	0	0
ESTNV_36462_1509	G	80	1	0	0
GCR_cBin6609_Ctg1_71	A	5	0.0625	0.000683594	0.0261456
GCR_cBin6609_Ctg1_71	G	75	0.9375	0.000683594	0.0261456
ESTV_15119_356	A	80	1	0	0
ESTV_15119_669	G	80	1	0	0
ESTV_17201_545	A	80	1	0	0
GCR_cBin612_Ctg1_226	A	80	1	0	0
GCR_cBin612_Ctg1_112	A	80	1	0	0
ESTV_17314_458	A	44	0.55	0.0024375	0.049371
ESTV_17314_458	G	36	0.45	0.0024375	0.049371
ESTNV_33518_1279	A	57	0.7125	0.00308984	0.0555864
ESTNV_33518_1279	G	23	0.2875	0.00308984	0.0555864
ESTV_14711_157	C	57	0.7125	0.00308984	0.0555864
ESTV_14711_157	G	23	0.2875	0.00308984	0.0555864
ESTNV_33256_490	C	80	1	0	0
ESTNV_35896_536	C	80	1	0	0
ESTNV_23557_1342	A	80	1	0	0
ESTNV_34257_418	A	30	0.375	0.00242187	0.0492125
ESTNV_34257_418	G	50	0.625	0.00242187	0.0492125
ESTNV_30607_306	A	44	0.55	0.0030625	0.0553399
ESTNV_30607_306	C	36	0.45	0.0030625	0.0553399
ESTV_16586_812	A	80	1	0	0
GCR_cBin959_Ctg1_31	C	80	1	0	0
GCR_cBin47_Ctg1_552	A	80	1	0	0
ESTNV_30699_568	C	80	1	0	0
GCR_cBin10694_Ctg1_368	G	80	1	0	0
ESTNV_35766_1019	A	29	0.3625	0.00343359	0.0585969
ESTNV_35766_1019	T	51	0.6375	0.00343359	0.0585969
ESTNV_35766_1178	A	28	0.35	0.0031875	0.0564579
ESTNV_35766_1178	G	52	0.65	0.0031875	0.0564579
ESTNV_16380_81	A	80	1	0	0
ESTNV_35628_2851	A	10	0.125	0.00117187	0.0342327
ESTNV_35628_2851	C	70	0.875	0.00117187	0.0342327
GCR_cBin2723_Ctg1_244	A	8	0.1	0.001	0.0316228
GCR_cBin2723_Ctg1_244	G	72	0.9	0.001	0.0316228
ESTNV_31916_578	A	45	0.5625	0.00287109	0.0535826
ESTNV_31916_578	C	35	0.4375	0.00287109	0.0535826
ESTNV_35628_2366	A	10	0.125	0.00117187	0.0342327
ESTNV_35628_2366	T	70	0.875	0.00117187	0.0342327
GCR_cBin41959_Ctg1_48	A	69	0.8625	0.00124609	0.0353001
GCR_cBin41959_Ctg1_48	C	11	0.1375	0.00124609	0.0353001
GCR_cBin31945_Ctg1_172	G	80	1	0	0
GCR_cBin38135_Ctg1_130	T	80	1	0	0
ESTV_18633_368	A	53	0.6625	0.00199609	0.0446777
ESTV_18633_368	G	27	0.3375	0.00199609	0.0446777
ESTNV_33335_64	A	75	0.9375	0.000683594	0.0261456
ESTNV_33335_64	G	5	0.0625	0.000683594	0.0261456
GCR_rBin17113_Ctg1_146	A	80	1	0	0
GCR_cBin38782_Ctg1_147	A	80	1	0	0
ESTNV_36893_386	A	32	0.4	0.0019375	0.044017
ESTNV_36893_386	G	48	0.6	0.0019375	0.044017
ESTNV_34577_143	A	5	0.0641026	0.000716465	0.0267669
ESTNV_34577_143	C	73	0.935897	0.000716465	0.0267669
ESTNV_33032_67	A	42	0.525	0.00342188	0.0584968
ESTNV_33032_67	G	38	0.475	0.00342188	0.0584968
ESTNV_26918_325	A	80	1	0	0
ESTNV_35466_1485	A	1	0.0125	0.000152344	0.0123428
ESTNV_35466_1485	G	79	0.9875	0.000152344	0.0123428
ESTNV_34644_2797	A	35	0.4375	0.00255859	0.0505825
ESTNV_34644_2797	C	45	0.5625	0.00255859	0.0505825
ESTNV_36457_2447	A	80	1	0	0
ESTNV_29707_992	G	80	1	0	0
ESTV_15722_638	G	80	1	0	0
ESTNV_33266_651	A	28	0.35	0.00225	0.0474342
ESTNV_33266_651	C	52	0.65	0.00225	0.0474342
ESTNV_33608_1627	C	16	0.2	0.0018125	0.0425735
ESTNV_33608_1627	G	64	0.8	0.0018125	0.0425735
ESTNV_13978_305	A	60	0.75	0.0021875	0.0467707
ESTNV_13978_305	G	20	0.25	0.0021875	0.0467707
ESTV_17836_900	A	35	0.4375	0.00443359	0.0665852
ESTV_17836_900	G	45	0.5625	0.00443359	0.0665852
ESTNV_35151_385	C	36	0.45	0.0043125	0.0656696
ESTNV_35151_385	G	44	0.55	0.0043125	0.0656696
ESTNV_32218_633	A	7	0.0875	0.000902344	0.030039
ESTNV_32218_633	G	73	0.9125	0.000902344	0.030039
ESTV_20996_116	A	80	1	0	0
GCR_cBin745_Ctg2_456	G	80	1	0	0
GCR_cBin745_Ctg2_344	A	80	1	0	0
GCR_cBin21647_Ctg1_220	A	80	1	0	0
GCR_cBin33130_Ctg1_122	A	6	0.075	0.000796875	0.028229
GCR_cBin33130_Ctg1_122	G	74	0.925	0.000796875	0.028229
GCR_cBin47864_Ctg1_28	C	80	1	0	0
GCR_cBin6555_Ctg1_102	C	80	1	0	0
GCR_cBin6555_Ctg1_258	C	80	1	0	0
GCR_cBin48426_Ctg1_136	A	73	0.9125	0.000902344	0.030039
GCR_cBin48426_Ctg1_136	C	7	0.0875	0.000902344	0.030039
GCR_cBin30011_Ctg1_172	C	80	1	0	0
ESTNV_30477_550	A	26	0.325	0.00235937	0.0485734
ESTNV_30477_550	G	54	0.675	0.00235937	0.0485734
GCR_cBin5951_Ctg1_108	A	14	0.175	0.00173438	0.0416458
GCR_cBin5951_Ctg1_108	C	66	0.825	0.00173438	0.0416458
GCR_cBin34041_Ctg1_311	A	62	0.775	0.00185937	0.0431205
GCR_cBin34041_Ctg1_311	G	18	0.225	0.00185937	0.0431205
GCR_cBin6674_Ctg1_36	A	14	0.175	0.00173438	0.0416458
GCR_cBin6674_Ctg1_36	C	66	0.825	0.00173438	0.0416458
GCR_cBin23470_Ctg1_62	A	26	0.325	0.00360938	0.0600781
GCR_cBin23470_Ctg1_62	G	54	0.675	0.00360938	0.0600781
ESTNV_33867_553	C	18	0.230769	0.00159308	0.0399134
ESTNV_33867_553	G	60	0.769231	0.00159308	0.0399134
GCR_cBin19578_Ctg1_70	A	9	0.115385	0.00113792	0.033733
GCR_cBin19578_Ctg1_70	G	69	0.884615	0.00113792	0.033733
ESTNV_23914_404	G	80	1	0	0
GCR_cBin42906_Ctg1_128	A	12	0.15	0.0013125	0.0362284
GCR_cBin42906_Ctg1_128	G	68	0.85	0.0013125	0.0362284
ESTV_14035_356	A	36	0.45	0.0018125	0.0425735
ESTV_14035_356	C	44	0.55	0.0018125	0.0425735
ESTNV_28531_364	G	80	1	0	0
GCR_cBin14760_Ctg1_76	C	80	1	0	0
ESTNV_35783_626	G	80	1	0	0
ESTNV_35783_1291	A	9	0.1125	0.00108984	0.0330128
ESTNV_35783_1291	G	71	0.8875	0.00108984	0.0330128
GCR_cBin32172_Ctg1_145	A	75	0.9375	0.000683594	0.0261456
GCR_cBin32172_Ctg1_145	C	5	0.0625	0.000683594	0.0261456
GCR_cBin32172_Ctg1_47	A	5	0.0625	0.000683594	0.0261456
GCR_cBin32172_Ctg1_47	G	75	0.9375	0.000683594	0.0261456
GCR_hBin20109_Ctg1_164	G	80	1	0	0
GCR_cBin4288_Ctg1_82	A	80	1	0	0
GCR_cBin4288_Ctg1_252	G	80	1	0	0
GCR_rBin15703_Ctg1_214	A	22	0.275	0.00279687	0.0528855
GCR_rBin15703_Ctg1_214	G	58	0.725	0.00279687	0.0528855
GCR_cBin1659_Ctg1_213	A	51	0.6375	0.00343359	0.0585969
GCR_cBin1659_Ctg1_213	G	29	0.3625	0.00343359	0.0585969
GCR_cBin26421_Ctg1_81	G	80	1	0	0
ESTV_20470_501	C	80	1	0	0
GCR_cBin23258_Ctg1_190	A	49	0.6125	0.00327734	0.0572481
GCR_cBin23258_Ctg1_190	C	31	0.3875	0.00327734	0.0572481
GCR_cBin19351_Ctg1_165	A	73	0.9125	0.00121484	0.0348546
GCR_cBin19351_Ctg1_165	C	7	0.0875	0.00121484	0.0348546
GCR_cBin42451_Ctg1_191	A	80	1	0	0
BASS110_B6A_E06_264	A	10	0.125	0.00117187	0.0342327
BASS110_B6A_E06_264	G	70	0.875	0.00117187	0.0342327
GCR_cBin10510_Ctg1_197	A	72	0.9	0.001	0.0316228
GCR_cBin10510_Ctg1_197	G	8	0.1	0.001	0.0316228
ESTNV_12902_251	A	32	0.4	0.0031875	0.0564579
ESTNV_12902_251	G	48	0.6	0.0031875	0.0564579
ESTNV_36163_936	A	6	0.075	0.000796875	0.028229
ESTNV_36163_936	G	74	0.925	0.000796875	0.028229
ESTNV_23562_420	A	6	0.075	0.000796875	0.028229
ESTNV_23562_420	G	74	0.925	0.000796875	0.028229
GCR_cBin21084_Ctg1_69	A	24	0.315789	0.00291588	0.0539989
GCR_cBin21084_Ctg1_69	G	52	0.684211	0.00291588	0.0539989
GCR_cBin27595_Ctg1_103	A	80	1	0	0
GCR_cBin2432_Ctg1_559	G	80	1	0	0
GCR_hBin1530_Ctg1_68	A	80	1	0	0
ESTV_17164_89	G	80	1	0	0
ESTNV_32560_1127	A	41	0.5125	0.00327734	0.0572481
ESTNV_32560_1127	G	39	0.4875	0.00327734	0.0572481
ESTNV_29923_186	A	21	0.269231	0.00192181	0.0438385
ESTNV_29923_186	G	57	0.730769	0.00192181	0.0438385
GCR_cBin6775_Ctg1_75	A	80	1	0	0
GCR_cBin26628_Ctg1_243	A	67	0.8375	0.00199609	0.0446777
GCR_cBin26628_Ctg1_243	C	13	0.1625	0.00199609	0.0446777
GCR_cBin1711_Ctg1_654	A	67	0.8375	0.00168359	0.0410316
GCR_cBin1711_Ctg1_654	G	13	0.1625	0.00168359	0.0410316
GCR_cBin19737_Ctg1_226	A	67	0.8375	0.00168359	0.0410316
GCR_cBin19737_Ctg1_226	G	13	0.1625	0.00168359	0.0410316
GCR_cBin19737_Ctg1_139	A	67	0.8375	0.00168359	0.0410316
GCR_cBin19737_Ctg1_139	C	13	0.1625	0.00168359	0.0410316
GCR_cBin21489_Ctg1_370	A	68	0.85	0.001625	0.0403113
GCR_cBin21489_Ctg1_370	G	12	0.15	0.001625	0.0403113
GCR_cBin3741_Ctg1_126	C	19	0.2375	0.00155859	0.039479
GCR_cBin3741_Ctg1_126	G	61	0.7625	0.00155859	0.039479
ESTNV_25641_253	A	58	0.725	0.00248438	0.0498435
ESTNV_25641_253	C	22	0.275	0.00248438	0.0498435
ESTV_21342_355	A	41	0.5125	0.00233984	0.0483719
ESTV_21342_355	G	39	0.4875	0.00233984	0.0483719
GCR_cBin37684_Ctg1_55	A	54	0.675	0.00329687	0.0574184
GCR_cBin37684_Ctg1_55	G	26	0.325	0.00329687	0.0574184
GCR_cBin31693_Ctg1_74	A	73	0.9125	0.000902344	0.030039
GCR_cBin31693_Ctg1_74	C	7	0.0875	0.000902344	0.030039
GCR_cBin31693_Ctg1_166	A	73	0.9125	0.000902344	0.030039
GCR_cBin31693_Ctg1_166	G	7	0.0875	0.000902344	0.030039
GCR_cBin37684_Ctg1_202	A	73	0.9125	0.000902344	0.030039
GCR_cBin37684_Ctg1_202	G	7	0.0875	0.000902344	0.030039
GCR_cBin25358_Ctg1_191	A	1	0.0125	0.000152344	0.0123428
GCR_cBin25358_Ctg1_191	G	79	0.9875	0.000152344	0.0123428
GCR_cBin28563_Ctg1_122	A	80	1	0	0
GCR_cBin49901_Ctg1_37	A	11	0.1375	0.00124609	0.0353001
GCR_cBin49901_Ctg1_37	G	69	0.8625	0.00124609	0.0353001
ESTNV_18093_348	C	80	1	0	0
GCR_cBin46142_Ctg1_191	A	43	0.5375	0.00262109	0.0511966
GCR_cBin46142_Ctg1_191	G	37	0.4625	0.00262109	0.0511966
ESTNV_32502_411	G	80	1	0	0
ESTNV_28577_526	A	79	0.9875	0.000152344	0.0123428
ESTNV_28577_526	C	1	0.0125	0.000152344	0.0123428
ESTV_16640_186	C	26	0.325	0.00204688	0.0452424
ESTV_16640_186	G	54	0.675	0.00204688	0.0452424
BASS138_B7_G02_640	A	71	0.8875	0.00140234	0.0374479
BASS138_B7_G02_640	G	9	0.1125	0.00140234	0.0374479
GCR_hBin50784_Ctg1_70	A	55	0.6875	0.00240234	0.0490137
GCR_hBin50784_Ctg1_70	T	25	0.3125	0.00240234	0.0490137
GCR_cBin5629_Ctg1_134	A	29	0.3625	0.00249609	0.0499609
GCR_cBin5629_Ctg1_134	C	51	0.6375	0.00249609	0.0499609
ESTNV_36561_1246	G	80	1	0	0
ESTNV_27729_435	C	80	1	0	0
ESTV_15528_560	C	80	1	0	0
ESTNV_16145_162	A	75	0.9375	0.000683594	0.0261456
ESTNV_16145_162	T	5	0.0625	0.000683594	0.0261456
ESTNV_33367_515	A	80	1	0	0
GCR_cBin46269_Ctg1_130	G	80	1	0	0
ESTNV_35689_1120	C	46	0.575	0.00329687	0.0574184
ESTNV_35689_1120	G	34	0.425	0.00329687	0.0574184
ESTNV_33988_1757	A	80	1	0	0
ESTNV_33988_762	A	21	0.2625	0.00155859	0.039479
ESTNV_33988_762	G	59	0.7375	0.00155859	0.039479
GCR_hBin32294_Ctg1_368	A	80	1	0	0
GCR_cBin3506_Ctg1_309	A	28	0.35	0.002875	0.053619
GCR_cBin3506_Ctg1_309	G	52	0.65	0.002875	0.053619
GCR_cBin21806_Ctg1_79	A	19	0.2375	0.00218359	0.0467289
GCR_cBin21806_Ctg1_79	T	61	0.7625	0.00218359	0.0467289
GCR_cBin32360_Ctg1_288	A	61	0.7625	0.00218359	0.0467289
GCR_cBin32360_Ctg1_288	G	19	0.2375	0.00218359	0.0467289
GCR_cBin3506_Ctg1_149	A	28	0.35	0.002875	0.053619
GCR_cBin3506_Ctg1_149	C	52	0.65	0.002875	0.053619
GCR_cBin15410_Ctg1_212	A	20	0.25	0.0021875	0.0467707
GCR_cBin15410_Ctg1_212	C	60	0.75	0.0021875	0.0467707
ESTNV_30819_535	C	80	1	0	0
GCR_cBin13823_Ctg2_368	G	80	1	0	0
ESTV_16643_373	G	80	1	0	0
ESTV_16643_586	G	80	1	0	0
ESTV_20925_1105	A	78	0.975	0.000296875	0.0172301
ESTV_20925_1105	C	2	0.025	0.000296875	0.0172301
ESTNV_36918_790	A	78	0.975	0.000296875	0.0172301
ESTNV_36918_790	G	2	0.025	0.000296875	0.0172301
ESTNV_32393_853	A	35	0.4375	0.00318359	0.0564233
ESTNV_32393_853	G	45	0.5625	0.00318359	0.0564233
GCR_cBin4742_Ctg1_269	A	80	1	0	0
ESTNV_17126_935	A	50	0.625	0.00335937	0.0579601
ESTNV_17126_935	C	30	0.375	0.00335937	0.0579601
BASS139_B7_E01_105	A	25	0.3125	0.00240234	0.0490137
BASS139_B7_E01_105	C	55	0.6875	0.00240234	0.0490137
ESTNV_33917_998	A	32	0.4	0.0031875	0.0564579
ESTNV_33917_998	G	48	0.6	0.0031875	0.0564579
ESTNV_33917_1292	A	48	0.6	0.0031875	0.0564579
ESTNV_33917_1292	G	32	0.4	0.0031875	0.0564579
GCR_cBin15022_Ctg1_318	A	11	0.1375	0.00124609	0.0353001
GCR_cBin15022_Ctg1_318	C	69	0.8625	0.00124609	0.0353001
BASS140_B7_E09_126	C	80	1	0	0
GCR_cBin27107_Ctg1_427	A	80	1	0	0
BASS140_B7_E09_544	A	67	0.8375	0.00168359	0.0410316
BASS140_B7_E09_544	G	13	0.1625	0.00168359	0.0410316
GCR_cBin4279_Ctg1_224	A	9	0.1125	0.00108984	0.0330128
GCR_cBin4279_Ctg1_224	T	71	0.8875	0.00108984	0.0330128
GCR_cBin28906_Ctg1_149	A	76	0.95	0.0005625	0.0237171
GCR_cBin28906_Ctg1_149	G	4	0.05	0.0005625	0.0237171
GCR_cBin42059_Ctg1_20	A	9	0.1125	0.00108984	0.0330128
GCR_cBin42059_Ctg1_20	G	71	0.8875	0.00108984	0.0330128
ESTV_16809_973	A	74	0.925	0.000796875	0.028229
ESTV_16809_973	G	6	0.075	0.000796875	0.028229
ESTNV_37616_3894	C	80	1	0	0
GCR_cBin9806_Ctg1_249	C	28	0.35	0.001625	0.0403113
GCR_cBin9806_Ctg1_249	G	52	0.65	0.001625	0.0403113
ESTV_13644_410	A	1	0.0125	0.000152344	0.0123428
ESTV_13644_410	G	79	0.9875	0.000152344	0.0123428
GCR_cBin9103_Ctg1_35	A	26	0.325	0.00173438	0.0416458
GCR_cBin9103_Ctg1_35	G	54	0.675	0.00173438	0.0416458
GCR_cBin1541_Ctg1_424	A	26	0.325	0.00173438	0.0416458
GCR_cBin1541_Ctg1_424	G	54	0.675	0.00173438	0.0416458
ESTNV_13516_123	A	49	0.6125	0.00265234	0.0515009
ESTNV_13516_123	T	31	0.3875	0.00265234	0.0515009
ESTNV_35567_72	A	77	0.9625	0.000433594	0.0208229
ESTNV_35567_72	G	3	0.0375	0.000433594	0.0208229
ESTNV_28966_1171	A	63	0.7875	0.00183984	0.0428934
ESTNV_28966_1171	G	17	0.2125	0.00183984	0.0428934
ESTNV_14764_458	A	60	0.769231	0.00159308	0.0399134
ESTNV_14764_458	G	18	0.230769	0.00159308	0.0399134
ESTNV_32717_1091	C	80	1	0	0
GCR_cBin51398_Ctg1_70	A	64	0.842105	0.00211401	0.0459784
GCR_cBin51398_Ctg1_70	C	12	0.157895	0.00211401	0.0459784
ESTNV_25398_289	A	78	0.975	0.000296875	0.0172301
ESTNV_25398_289	C	2	0.025	0.000296875	0.0172301
GCR_cBin36279_Ctg1_64	A	80	1	0	0
ESTNV_29240_385	A	55	0.6875	0.00271484	0.0521042
ESTNV_29240_385	C	25	0.3125	0.00271484	0.0521042
GCR_cBin6162_Ctg1_59	C	80	1	0	0
GCR_cBin16401_Ctg1_326	A	78	0.975	0.000296875	0.0172301
GCR_cBin16401_Ctg1_326	T	2	0.025	0.000296875	0.0172301
ESTNV_34931_121	A	58	0.725	0.00248438	0.0498435
ESTNV_34931_121	C	22	0.275	0.00248438	0.0498435
GCR_cBin31415_Ctg1_119	A	41	0.5125	0.00265234	0.0515009
GCR_cBin31415_Ctg1_119	T	39	0.4875	0.00265234	0.0515009
GCR_cBin17319_Ctg1_126	C	80	1	0	0
GCR_cBin9564_Ctg1_161	G	80	1	0	0
GCR_cBin9732_Ctg1_64	C	42	0.525	0.00248438	0.0498435
GCR_cBin9732_Ctg1_64	G	38	0.475	0.00248438	0.0498435
GCR_cBin35021_Ctg1_70	A	80	1	0	0
GCR_cBin19394_Ctg1_156	G	80	1	0	0
GCR_cBin46118_Ctg1_223	A	80	1	0	0
GCR_cBin41876_Ctg1_108	G	80	1	0	0
GCR_cBin29958_Ctg1_84	A	66	0.825	0.00142187	0.0377078
GCR_cBin29958_Ctg1_84	G	14	0.175	0.00142187	0.0377078
ESTV_17539_1123	C	78	0.975	0.000296875	0.0172301
ESTV_17539_1123	G	2	0.025	0.000296875	0.0172301
GCR_cBin12278_Ctg1_153	A	58	0.725	0.00185937	0.0431205
GCR_cBin12278_Ctg1_153	G	22	0.275	0.00185937	0.0431205
ESTNV_33422_864	A	54	0.675	0.00204688	0.0452424
ESTNV_33422_864	T	26	0.325	0.00204688	0.0452424
GCR_cBin15028_Ctg1_199	A	70	0.875	0.00117187	0.0342327
GCR_cBin15028_Ctg1_199	C	10	0.125	0.00117187	0.0342327
ESTV_15187_371	G	80	1	0	0
ESTNV_28503_575	A	80	1	0	0
ESTNV_28503_327	A	80	1	0	0
GCR_cBin9428_Ctg1_32	C	80	1	0	0
ESTNV_36230_1120	A	11	0.1375	0.00124609	0.0353001
ESTNV_36230_1120	G	69	0.8625	0.00124609	0.0353001
ESTV_17202_480	A	75	0.9375	0.000683594	0.0261456
ESTV_17202_480	C	5	0.0625	0.000683594	0.0261456
ESTNV_30258_90	A	80	1	0	0
GCR_cBin37930_Ctg1_88	A	69	0.8625	0.00187109	0.0432561
GCR_cBin37930_Ctg1_88	G	11	0.1375	0.00187109	0.0432561
GCR_cBin7082_Ctg1_204	A	80	1	0	0
ESTNV_34419_496	C	64	0.8	0.00275	0.0524404
ESTNV_34419_496	G	16	0.2	0.00275	0.0524404
ESTNV_34833_1382	A	80	1	0	0
ESTNV_35650_2037	C	80	1	0	0
GCR_cBin19287_Ctg1_252	A	35	0.4375	0.00318359	0.0564233
GCR_cBin19287_Ctg1_252	G	45	0.5625	0.00318359	0.0564233
ESTNV_35635_2078	A	12	0.15	0.0013125	0.0362284
ESTNV_35635_2078	C	68	0.85	0.0013125	0.0362284
GCR_hBin6632_Ctg1_121	A	11	0.1375	0.00187109	0.0432561
GCR_hBin6632_Ctg1_121	C	69	0.8625	0.00187109	0.0432561
BASS112_B7_A12_127	A	80	1	0	0
BASS112_B7_A12_395	G	80	1	0	0
ESTNV_36511_141	G	80	1	0	0
ESTV_13197_590	A	55	0.6875	0.00177734	0.0421586
ESTV_13197_590	C	25	0.3125	0.00177734	0.0421586
GCR_cBin4805_Ctg1_193	A	78	0.975	0.000609375	0.0246855
GCR_cBin4805_Ctg1_193	G	2	0.025	0.000609375	0.0246855
ESTNV_35329_908	C	74	0.925	0.000796875	0.028229
ESTNV_35329_908	G	6	0.075	0.000796875	0.028229
ESTNV_35352_241	A	44	0.55	0.002125	0.0460977
ESTNV_35352_241	G	36	0.45	0.002125	0.0460977
ESTNV_35352_77	A	36	0.45	0.002125	0.0460977
ESTNV_35352_77	C	44	0.55	0.002125	0.0460977
ESTNV_35329_232	A	6	0.075	0.000796875	0.028229
ESTNV_35329_232	G	74	0.925	0.000796875	0.028229
GCR_cBin2433_Ctg1_97	A	73	0.9125	0.000902344	0.030039
GCR_cBin2433_Ctg1_97	G	7	0.0875	0.000902344	0.030039
ESTV_16979_565	A	80	1	0	0
ESTNV_33016_564	A	80	1	0	0
GCR_cBin568_Ctg1_74	A	79	0.9875	0.000152344	0.0123428
GCR_cBin568_Ctg1_74	C	1	0.0125	0.000152344	0.0123428
GCR_cBin3044_Ctg1_47	C	13	0.1625	0.00137109	0.0370283
GCR_cBin3044_Ctg1_47	G	67	0.8375	0.00137109	0.0370283
GCR_hBin45092_Ctg1_140	A	50	0.625	0.00242187	0.0492125
GCR_hBin45092_Ctg1_140	T	30	0.375	0.00242187	0.0492125
GCR_hBin45092_Ctg1_57	A	80	1	0	0
GCR_cBin16144_Ctg1_285	A	23	0.2875	0.00215234	0.0463934
GCR_cBin16144_Ctg1_285	G	57	0.7125	0.00215234	0.0463934
GCR_cBin17565_Ctg1_349	C	60	0.75	0.0021875	0.0467707
GCR_cBin17565_Ctg1_349	G	20	0.25	0.0021875	0.0467707
GCR_cBin17565_Ctg1_401	A	60	0.75	0.0021875	0.0467707
GCR_cBin17565_Ctg1_401	G	20	0.25	0.0021875	0.0467707
GCR_cBin1635_Ctg1_70	T	80	1	0	0
ESTNV_34623_1031	A	2	0.025	0.000296875	0.0172301
ESTNV_34623_1031	G	78	0.975	0.000296875	0.0172301
GCR_cBin9253_Ctg1_169	A	53	0.716216	0.00202357	0.0449841
GCR_cBin9253_Ctg1_169	C	21	0.283784	0.00202357	0.0449841
ESTNV_35547_1444	A	1	0.0125	0.000152344	0.0123428
ESTNV_35547_1444	G	79	0.9875	0.000152344	0.0123428
ESTNV_30983_1638	A	25	0.3125	0.00240234	0.0490137
ESTNV_30983_1638	G	55	0.6875	0.00240234	0.0490137
ESTNV_28895_687	C	80	1	0	0
ESTNV_36086_719	C	4	0.05	0.0005625	0.0237171
ESTNV_36086_719	G	76	0.95	0.0005625	0.0237171
ESTNV_35503_345	A	74	0.925	0.000796875	0.028229
ESTNV_35503_345	G	6	0.075	0.000796875	0.028229
ESTNV_35503_827	C	4	0.0512821	0.00059003	0.0242905
ESTNV_35503_827	G	74	0.948718	0.00059003	0.0242905
ESTNV_32703_428	A	80	1	0	0
ESTNV_32703_647	A	80	1	0	0
ESTNV_28129_298	A	80	1	0	0
ESTNV_37656_1100	A	50	0.625	0.00273437	0.0522913
ESTNV_37656_1100	G	30	0.375	0.00273437	0.0522913
ESTV_21187_191	G	80	1	0	0
ESTV_21697_1223	A	4	0.05	0.0005625	0.0237171
ESTV_21697_1223	G	76	0.95	0.0005625	0.0237171
ESTV_21801_199	A	80	1	0	0
ESTNV_22829_341	A	14	0.175	0.00173438	0.0416458
ESTNV_22829_341	C	66	0.825	0.00173438	0.0416458
GCR_cBin8515_Ctg1_191	C	80	1	0	0
GCR_cBin40624_Ctg1_148	A	8	0.1	0.001	0.0316228
GCR_cBin40624_Ctg1_148	G	72	0.9	0.001	0.0316228
GCR_cBin33417_Ctg1_101	G	80	1	0	0
ESTV_11377_108	A	19	0.2375	0.00187109	0.0432561
ESTV_11377_108	G	61	0.7625	0.00187109	0.0432561
ESTNV_21396_116	G	80	1	0	0
GCR_cBin41869_Ctg1_110	A	80	1	0	0
ESTNV_31747_532	G	80	1	0	0
ESTV_16743_404	G	80	1	0	0
ESTV_20625_51	C	80	1	0	0
ESTNV_20180_573	A	80	1	0	0
ESTNV_34353_55	A	80	1	0	0
GCR_cBin6795_Ctg1_308	A	79	0.9875	0.000152344	0.0123428
GCR_cBin6795_Ctg1_308	G	1	0.0125	0.000152344	0.0123428
ESTV_21892_327	C	47	0.5875	0.00433984	0.0658775
ESTV_21892_327	G	33	0.4125	0.00433984	0.0658775
GCR_cBin17748_Ctg1_51	C	80	1	0	0
ESTNV_35314_130	C	62	0.794872	0.00187967	0.0433551
ESTNV_35314_130	G	16	0.205128	0.00187967	0.0433551
ESTNV_34464_1404	A	17	0.2125	0.00183984	0.0428934
ESTNV_34464_1404	G	63	0.7875	0.00183984	0.0428934
GCR_cBin4170_Ctg1_233	A	78	0.975	0.000296875	0.0172301
GCR_cBin4170_Ctg1_233	C	2	0.025	0.000296875	0.0172301
GCR_cBin4170_Ctg1_228	A	2	0.025	0.000296875	0.0172301
GCR_cBin4170_Ctg1_228	G	78	0.975	0.000296875	0.0172301
GCR_cBin5339_Ctg1_208	A	49	0.6125	0.00233984	0.0483719
GCR_cBin5339_Ctg1_208	G	31	0.3875	0.00233984	0.0483719
ESTNV_26088_606	C	57	0.7125	0.00183984	0.0428934
ESTNV_26088_606	G	23	0.2875	0.00183984	0.0428934
GCR_cBin16885_Ctg1_348	A	2	0.025	0.000296875	0.0172301
GCR_cBin16885_Ctg1_348	C	78	0.975	0.000296875	0.0172301
GCR_cBin24218_Ctg1_261	A	80	1	0	0
BASS136_B7_E01_171	A	71	0.8875	0.00140234	0.0374479
BASS136_B7_E01_171	G	9	0.1125	0.00140234	0.0374479
ESTV_12417_100	A	75	0.9375	0.000683594	0.0261456
ESTV_12417_100	G	5	0.0625	0.000683594	0.0261456
GCR_cBin4908_Ctg1_226	A	5	0.0625	0.000683594	0.0261456
GCR_cBin4908_Ctg1_226	G	75	0.9375	0.000683594	0.0261456
GCR_cBin10777_Ctg1_196	G	80	1	0	0
ESTV_12417_208	A	75	0.9375	0.000683594	0.0261456
ESTV_12417_208	C	5	0.0625	0.000683594	0.0261456
ESTV_16934_1328	A	80	1	0	0
ESTV_16934_1568	A	80	1	0	0
GCR_cBin13949_Ctg1_125	A	5	0.0625	0.000683594	0.0261456
GCR_cBin13949_Ctg1_125	G	75	0.9375	0.000683594	0.0261456
ESTNV_30017_552	A	43	0.5375	0.00324609	0.0569745
ESTNV_30017_552	C	37	0.4625	0.00324609	0.0569745
GCR_cBin4585_Ctg1_148	A	7	0.0875	0.00121484	0.0348546
GCR_cBin4585_Ctg1_148	G	73	0.9125	0.00121484	0.0348546
ESTNV_30017_158	A	44	0.55	0.003375	0.0580948
ESTNV_30017_158	T	36	0.45	0.003375	0.0580948
GCR_cBin44859_Ctg1_254	A	72	0.9	0.001	0.0316228
GCR_cBin44859_Ctg1_254	G	8	0.1	0.001	0.0316228
GCR_cBin14217_Ctg1_414	A	63	0.7875	0.00152734	0.0390812
GCR_cBin14217_Ctg1_414	G	17	0.2125	0.00152734	0.0390812
ESTNV_35114_720	T	80	1	0	0
ESTV_15386_484	A	38	0.475	0.00279687	0.0528855
ESTV_15386_484	G	42	0.525	0.00279687	0.0528855
GCR_cBin44030_Ctg1_237	A	35	0.448718	0.00354861	0.0595702
GCR_cBin44030_Ctg1_237	G	43	0.551282	0.00354861	0.0595702
GCR_cBin992_Ctg1_309	A	80	1	0	0
GCR_cBin25010_Ctg1_148	A	59	0.7375	0.00218359	0.0467289
GCR_cBin25010_Ctg1_148	T	21	0.2625	0.00218359	0.0467289
GCR_hBin10171_Ctg1_182	C	55	0.6875	0.00240234	0.0490137
GCR_hBin10171_Ctg1_182	G	25	0.3125	0.00240234	0.0490137
GCR_cBin11431_Ctg1_401	A	78	0.975	0.000296875	0.0172301
GCR_cBin11431_Ctg1_401	G	2	0.025	0.000296875	0.0172301
ESTNV_25792_446	A	80	1	0	0
ESTNV_25792_698	G	80	1	0	0
ESTNV_23515_266	A	22	0.275	0.00310938	0.0557618
ESTNV_23515_266	C	58	0.725	0.00310938	0.0557618
ESTV_15402_87	A	8	0.1	0.001	0.0316228
ESTV_15402_87	T	72	0.9	0.001	0.0316228
ESTNV_25525_410	A	45	0.5625	0.00318359	0.0564233
ESTNV_25525_410	G	35	0.4375	0.00318359	0.0564233
GCR_cBin12379_Ctg1_94	C	62	0.775	0.00248438	0.0498435
GCR_cBin12379_Ctg1_94	G	18	0.225	0.00248438	0.0498435
GCR_cBin39590_Ctg1_87	C	74	0.925	0.000796875	0.028229
GCR_cBin39590_Ctg1_87	G	6	0.075	0.000796875	0.028229
ESTNV_36346_1426	G	80	1	0	0
GCR_cBin29880_Ctg1_23	A	6	0.075	0.000796875	0.028229
GCR_cBin29880_Ctg1_23	C	74	0.925	0.000796875	0.028229
ESTNV_13974_873	C	29	0.3625	0.00343359	0.0585969
ESTNV_13974_873	G	51	0.6375	0.00343359	0.0585969
GCR_cBin26310_Ctg1_189	A	80	1	0	0
GCR_cBin18612_Ctg1_67	A	2	0.027027	0.000345488	0.0185873
GCR_cBin18612_Ctg1_67	G	72	0.972973	0.000345488	0.0185873
ESTNV_36358_242	A	45	0.5625	0.00255859	0.0505825
ESTNV_36358_242	G	35	0.4375	0.00255859	0.0505825
ESTV_14645_361	A	40	0.5	0.0021875	0.0467707
ESTV_14645_361	C	40	0.5	0.0021875	0.0467707
ESTV_14645_221	G	80	1	0	0
ESTNV_31662_122	A	45	0.5625	0.00255859	0.0505825
ESTNV_31662_122	T	35	0.4375	0.00255859	0.0505825
GCR_cBin37721_Ctg1_160	G	80	1	0	0
ESTNV_32316_1197	C	47	0.5875	0.00402734	0.0634614
ESTNV_32316_1197	G	33	0.4125	0.00402734	0.0634614
GCR_cBin20050_Ctg1_34	A	52	0.65	0.0031875	0.0564579
GCR_cBin20050_Ctg1_34	C	28	0.35	0.0031875	0.0564579
GCR_cBin27614_Ctg1_152	A	64	0.8	0.0015	0.0387298
GCR_cBin27614_Ctg1_152	T	16	0.2	0.0015	0.0387298
GCR_cBin31420_Ctg1_20	G	80	1	0	0
GCR_cBin7487_Ctg1_102	A	80	1	0	0
ESTV_17368_88	A	53	0.6625	0.00262109	0.0511966
ESTV_17368_88	G	27	0.3375	0.00262109	0.0511966
ESTV_14503_197	A	26	0.325	0.00204688	0.0452424
ESTV_14503_197	C	54	0.675	0.00204688	0.0452424
ESTNV_34237_82	A	57	0.7125	0.00152734	0.0390812
ESTNV_34237_82	C	23	0.2875	0.00152734	0.0390812
GCR_cBin13024_Ctg1_175	A	2	0.025	0.000296875	0.0172301
GCR_cBin13024_Ctg1_175	G	78	0.975	0.000296875	0.0172301
GCR_cBin13024_Ctg1_142	A	9	0.1125	0.00108984	0.0330128
GCR_cBin13024_Ctg1_142	G	71	0.8875	0.00108984	0.0330128
GCR_cBin13024_Ctg1_140	A	9	0.1125	0.00108984	0.0330128
GCR_cBin13024_Ctg1_140	C	71	0.8875	0.00108984	0.0330128
GCR_cBin34183_Ctg1_158	A	9	0.1125	0.00108984	0.0330128
GCR_cBin34183_Ctg1_158	C	71	0.8875	0.00108984	0.0330128
GCR_cBin34183_Ctg1_159	A	71	0.8875	0.00108984	0.0330128
GCR_cBin34183_Ctg1_159	C	9	0.1125	0.00108984	0.0330128
GCR_cBin42808_Ctg1_202	A	63	0.7875	0.00152734	0.0390812
GCR_cBin42808_Ctg1_202	G	17	0.2125	0.00152734	0.0390812
GCR_cBin6567_Ctg1_114	A	33	0.4125	0.00308984	0.0555864
GCR_cBin6567_Ctg1_114	T	47	0.5875	0.00308984	0.0555864
BASS111_B7_D03_407	A	25	0.320513	0.00279	0.0528204
BASS111_B7_D03_407	C	53	0.679487	0.00279	0.0528204
GCR_hBin39311_Ctg1_131	C	7	0.0875	0.000902344	0.030039
GCR_hBin39311_Ctg1_131	G	73	0.9125	0.000902344	0.030039
ESTNV_36502_836	A	10	0.125	0.00117187	0.0342327
ESTNV_36502_836	G	70	0.875	0.00117187	0.0342327
BASS111_B7_D03_286	A	75	0.9375	0.000683594	0.0261456
BASS111_B7_D03_286	C	5	0.0625	0.000683594	0.0261456
BASS111_B7_D03_328	A	75	0.9375	0.000683594	0.0261456
BASS111_B7_D03_328	G	5	0.0625	0.000683594	0.0261456
GCR_hBin33430_Ctg1_182	G	80	1	0	0
GCR_cBin30182_Ctg1_141	A	52	0.666667	0.00273943	0.0523395
GCR_cBin30182_Ctg1_141	T	26	0.333333	0.00273943	0.0523395
ESTV_21750_731	A	78	1	0	0
ESTNV_35044_125	G	80	1	0	0
GCR_cBin17727_Ctg1_27	G	80	1	0	0
ESTV_15078_479	A	80	1	0	0
ESTV_15770_410	G	80	1	0	0
GCR_cBin20239_Ctg1_63	A	1	0.0125	0.000152344	0.0123428
GCR_cBin20239_Ctg1_63	G	79	0.9875	0.000152344	0.0123428
GCR_cBin19361_Ctg1_96	A	80	1	0	0
ESTNV_20218_62	A	2	0.025	0.000296875	0.0172301
ESTNV_20218_62	G	78	0.975	0.000296875	0.0172301
GCR_cBin37707_Ctg1_102	A	54	0.675	0.00204688	0.0452424
GCR_cBin37707_Ctg1_102	G	26	0.325	0.00204688	0.0452424
ESTNV_35887_1036	C	80	1	0	0
GCR_cBin13496_Ctg1_388	A	77	0.9625	0.000433594	0.0208229
GCR_cBin13496_Ctg1_388	G	3	0.0375	0.000433594	0.0208229
GCR_cBin6985_Ctg1_265	G	80	1	0	0
GCR_cBin5116_Ctg1_343	A	54	0.675	0.00267188	0.0516902
GCR_cBin5116_Ctg1_343	C	26	0.325	0.00267188	0.0516902
ESTNV_31531_916	A	73	0.9125	0.000902344	0.030039
ESTNV_31531_916	G	7	0.0875	0.000902344	0.030039
ESTV_18386_118	A	80	1	0	0
ESTV_18386_82	C	80	1	0	0
GCR_cBin4421_Ctg1_345	A	80	1	0	0
GCR_cBin4421_Ctg1_196	C	80	1	0	0
GCR_cBin33212_Ctg1_226	C	80	1	0	0
ESTNV_35525_1387	A	51	0.6375	0.00312109	0.0558667
ESTNV_35525_1387	G	29	0.3625	0.00312109	0.0558667
GCR_cBin793_Ctg1_69	A	63	0.7875	0.00183984	0.0428934
GCR_cBin793_Ctg1_69	G	17	0.2125	0.00183984	0.0428934
ESTNV_19126_343	G	80	1	0	0
ESTNV_19750_154	C	78	1	0	0
ESTV_16188_156	A	58	0.725	0.00279687	0.0528855
ESTV_16188_156	G	22	0.275	0.00279687	0.0528855
ESTNV_33045_743	C	27	0.3375	0.00355859	0.0596539
ESTNV_33045_743	G	53	0.6625	0.00355859	0.0596539
ESTV_16466_1044	A	41	0.5125	0.00296484	0.0544504
ESTV_16466_1044	C	39	0.4875	0.00296484	0.0544504
ESTNV_22986_1059	G	80	1	0	0
ESTV_16965_617	A	1	0.0125	0.000152344	0.0123428
ESTV_16965_617	G	79	0.9875	0.000152344	0.0123428
ESTNV_24241_102	C	80	1	0	0
GCR_hBin16599_Ctg1_79	A	16	0.2	0.0015	0.0387298
GCR_hBin16599_Ctg1_79	C	64	0.8	0.0015	0.0387298
ESTV_16604_550	A	1	0.0125	0.000152344	0.0123428
ESTV_16604_550	C	79	0.9875	0.000152344	0.0123428
GCR_cBin6090_Ctg1_166	C	80	1	0	0
ESTNV_14000_405	A	9	0.1125	0.00108984	0.0330128
ESTNV_14000_405	G	71	0.8875	0.00108984	0.0330128
GCR_cBin965_Ctg2_341	A	80	1	0	0
GCR_cBin965_Ctg2_356	C	80	1	0	0
ESTNV_14089_241	A	78	0.975	0.000296875	0.0172301
ESTNV_14089_241	G	2	0.025	0.000296875	0.0172301
ESTNV_29295_468	A	80	1	0	0
ESTV_13454_78	A	77	0.9625	0.000433594	0.0208229
ESTV_13454_78	C	3	0.0375	0.000433594	0.0208229
ESTNV_30013_731	A	76	0.95	0.0005625	0.0237171
ESTNV_30013_731	C	4	0.05	0.0005625	0.0237171
GCR_cBin2972_Ctg1_58	A	71	0.8875	0.00140234	0.0374479
GCR_cBin2972_Ctg1_58	G	9	0.1125	0.00140234	0.0374479
ESTV_14757_562	A	36	0.45	0.00275	0.0524404
ESTV_14757_562	G	44	0.55	0.00275	0.0524404
ESTNV_33128_78	A	23	0.2875	0.00246484	0.0496472
ESTNV_33128_78	C	57	0.7125	0.00246484	0.0496472
ESTV_14757_521	A	44	0.55	0.00275	0.0524404
ESTV_14757_521	G	36	0.45	0.00275	0.0524404
ESTNV_33128_565	A	57	0.7125	0.00246484	0.0496472
ESTNV_33128_565	G	23	0.2875	0.00246484	0.0496472
BASS123_B7_B04_360	G	80	1	0	0
ESTV_10850_97	A	30	0.375	0.00304688	0.0551985
ESTV_10850_97	C	50	0.625	0.00304688	0.0551985
ESTNV_23683_596	A	1	0.0125	0.000152344	0.0123428
ESTNV_23683_596	T	79	0.9875	0.000152344	0.0123428
GCR_cBin30866_Ctg1_113	A	43	0.5375	0.00262109	0.0511966
GCR_cBin30866_Ctg1_113	C	37	0.4625	0.00262109	0.0511966
ESTNV_37477_1100	A	31	0.3875	0.00296484	0.0544504
ESTNV_37477_1100	G	49	0.6125	0.00296484	0.0544504
GCR_cBin6066_Ctg1_86	A	29	0.3625	0.00343359	0.0585969
GCR_cBin6066_Ctg1_86	C	51	0.6375	0.00343359	0.0585969
ESTNV_37607_394	G	80	1	0	0
GCR_cBin37571_Ctg1_142	A	44	0.55	0.003375	0.0580948
GCR_cBin37571_Ctg1_142	G	36	0.45	0.003375	0.0580948
GCR_hBin31975_Ctg1_231	A	2	0.025	0.000296875	0.0172301
GCR_hBin31975_Ctg1_231	G	78	0.975	0.000296875	0.0172301
GCR_cBin4660_Ctg1_268	A	31	0.3875	0.00358984	0.0599153
GCR_cBin4660_Ctg1_268	G	49	0.6125	0.00358984	0.0599153
GCR_cBin12244_Ctg1_232	A	12	0.15	0.001625	0.0403113
GCR_cBin12244_Ctg1_232	T	68	0.85	0.001625	0.0403113
GCR_cBin26088_Ctg1_476	C	80	1	0	0
GCR_cBin11191_Ctg1_173	A	80	1	0	0
GCR_cBin5159_Ctg1_408	A	72	0.9	0.001	0.0316228
GCR_cBin5159_Ctg1_408	C	8	0.1	0.001	0.0316228
GCR_cBin5806_Ctg1_138	A	8	0.1	0.001	0.0316228
GCR_cBin5806_Ctg1_138	G	72	0.9	0.001	0.0316228
GCR_cBin5806_Ctg1_204	A	8	0.1	0.001	0.0316228
GCR_cBin5806_Ctg1_204	C	72	0.9	0.001	0.0316228
GCR_cBin5159_Ctg1_487	A	80	1	0	0
GCR_cBin27882_Ctg1_69	A	11	0.1375	0.00155859	0.039479
GCR_cBin27882_Ctg1_69	C	69	0.8625	0.00155859	0.039479
GCR_cBin33065_Ctg1_159	A	43	0.5375	0.00355859	0.0596539
GCR_cBin33065_Ctg1_159	G	37	0.4625	0.00355859	0.0596539
GCR_cBin27882_Ctg1_116	A	80	1	0	0
GCR_cBin715_Ctg1_93	C	80	1	0	0
ESTNV_32731_625	A	61	0.7625	0.00218359	0.0467289
ESTNV_32731_625	T	19	0.2375	0.00218359	0.0467289
BASS138_B7_B10_378	G	80	1	0	0
BASS15_B7_A08_510	A	13	0.1625	0.00168359	0.0410316
BASS15_B7_A08_510	T	67	0.8375	0.00168359	0.0410316
BASS138_B7_B10_225	A	13	0.1625	0.00168359	0.0410316
BASS138_B7_B10_225	T	67	0.8375	0.00168359	0.0410316
BASS138_B7_B10_200	A	13	0.1625	0.00168359	0.0410316
BASS138_B7_B10_200	C	67	0.8375	0.00168359	0.0410316
GCR_cBin48196_Ctg1_36	A	14	0.175	0.00173438	0.0416458
GCR_cBin48196_Ctg1_36	G	66	0.825	0.00173438	0.0416458
GCR_cBin48196_Ctg1_63	A	14	0.175	0.00173438	0.0416458
GCR_cBin48196_Ctg1_63	T	66	0.825	0.00173438	0.0416458
GCR_cBin15004_Ctg1_309	A	80	1	0	0
GCR_cBin15004_Ctg1_154	C	80	1	0	0
GCR_cBin10002_Ctg1_178	A	80	1	0	0
ESTNV_29033_400	C	80	1	0	0
ESTV_14722_480	G	80	1	0	0
ESTV_16691_375	A	46	0.575	0.00267188	0.0516902
ESTV_16691_375	C	34	0.425	0.00267188	0.0516902
ESTNV_37022_1170	C	20	0.25	0.0021875	0.0467707
ESTNV_37022_1170	G	60	0.75	0.0021875	0.0467707
GCR_cBin29826_Ctg1_167	C	78	1	0	0
GCR_cBin26631_Ctg1_386	G	80	1	0	0
ESTNV_33546_190	C	48	0.6	0.00225	0.0474342
ESTNV_33546_190	G	32	0.4	0.00225	0.0474342
ESTV_18022_968	A	17	0.2125	0.00183984	0.0428934
ESTV_18022_968	C	63	0.7875	0.00183984	0.0428934
GCR_cBin33117_Ctg1_151	A	80	1	0	0
ESTNV_37221_2328	G	80	1	0	0
ESTV_20832_153	A	80	1	0	0
ESTNV_31902_575	A	1	0.0125	0.000152344	0.0123428
ESTNV_31902_575	C	79	0.9875	0.000152344	0.0123428
GCR_hBin35499_Ctg1_49	A	6	0.075	0.000796875	0.028229
GCR_hBin35499_Ctg1_49	G	74	0.925	0.000796875	0.028229
GCR_cBin16471_Ctg1_206	A	1	0.0125	0.000152344	0.0123428
GCR_cBin16471_Ctg1_206	C	79	0.9875	0.000152344	0.0123428
GCR_cBin16471_Ctg1_71	A	1	0.0125	0.000152344	0.0123428
GCR_cBin16471_Ctg1_71	T	79	0.9875	0.000152344	0.0123428
GCR_cBin16471_Ctg1_124	A	79	0.9875	0.000152344	0.0123428
GCR_cBin16471_Ctg1_124	G	1	0.0125	0.000152344	0.0123428
ESTNV_27014_209	C	80	1	0	0
GCR_cBin15459_Ctg1_100	A	80	1	0	0
GCR_cBin16478_Ctg1_193	A	45	0.5625	0.00380859	0.0617138
GCR_cBin16478_Ctg1_193	G	35	0.4375	0.00380859	0.0617138
GCR_cBin16478_Ctg1_145	A	44	0.55	0.0030625	0.0553399
GCR_cBin16478_Ctg1_145	C	36	0.45	0.0030625	0.0553399
ESTV_13924_444	A	58	0.725	0.00185937	0.0431205
ESTV_13924_444	G	22	0.275	0.00185937	0.0431205
GCR_cBin15021_Ctg1_82	A	12	0.15	0.001625	0.0403113
GCR_cBin15021_Ctg1_82	G	68	0.85	0.001625	0.0403113
GCR_cBin15223_Ctg1_361	A	17	0.2125	0.00308984	0.0555864
GCR_cBin15223_Ctg1_361	C	63	0.7875	0.00308984	0.0555864
GCR_cBin13670_Ctg1_82	A	59	0.7375	0.00218359	0.0467289
GCR_cBin13670_Ctg1_82	G	21	0.2625	0.00218359	0.0467289
GCR_cBin17273_Ctg1_191	C	48	0.6	0.0025625	0.0506211
GCR_cBin17273_Ctg1_191	G	32	0.4	0.0025625	0.0506211
ESTNV_35671_745	A	72	0.972973	0.000345488	0.0185873
ESTNV_35671_745	G	2	0.027027	0.000345488	0.0185873
GCR_cBin2437_Ctg1_74	A	40	0.5	0.0025	0.05
GCR_cBin2437_Ctg1_74	C	40	0.5	0.0025	0.05
ESTV_20002_108	A	65	0.8125	0.00177734	0.0421586
ESTV_20002_108	C	15	0.1875	0.00177734	0.0421586
ESTNV_27042_601	A	7	0.0875	0.000902344	0.030039
ESTNV_27042_601	G	73	0.9125	0.000902344	0.030039
GCR_cBin5673_Ctg1_49	G	80	1	0	0
ESTNV_14277_249	G	76	1	0	0
ESTV_21870_705	A	71	0.8875	0.00108984	0.0330128
ESTV_21870_705	G	9	0.1125	0.00108984	0.0330128
ESTNV_32741_523	G	78	1	0	0
ESTNV_24857_790	A	80	1	0	0
GCR_cBin37659_Ctg1_151	A	80	1	0	0
GCR_cBin31955_Ctg1_100	C	80	1	0	0
GCR_cBin27635_Ctg1_277	G	80	1	0	0
GCR_cBin20771_Ctg1_93	A	80	1	0	0
GCR_cBin33206_Ctg1_109	A	69	0.8625	0.00124609	0.0353001
GCR_cBin33206_Ctg1_109	G	11	0.1375	0.00124609	0.0353001
GCR_cBin39280_Ctg1_175	A	11	0.1375	0.00124609	0.0353001
GCR_cBin39280_Ctg1_175	G	69	0.8625	0.00124609	0.0353001
GCR_cBin8844_Ctg1_179	A	12	0.15	0.0013125	0.0362284
GCR_cBin8844_Ctg1_179	C	68	0.85	0.0013125	0.0362284
GCR_cBin3000_Ctg1_193	A	70	0.875	0.00117187	0.0342327
GCR_cBin3000_Ctg1_193	C	10	0.125	0.00117187	0.0342327
GCR_cBin13782_Ctg1_64	A	66	0.825	0.00173438	0.0416458
GCR_cBin13782_Ctg1_64	G	14	0.175	0.00173438	0.0416458
GCR_cBin13782_Ctg1_67	A	14	0.175	0.00173438	0.0416458
GCR_cBin13782_Ctg1_67	G	66	0.825	0.00173438	0.0416458
GCR_cBin4290_Ctg1_99	A	68	0.871795	0.00122221	0.0349601
GCR_cBin4290_Ctg1_99	G	10	0.128205	0.00122221	0.0349601
ESTV_14384_381	G	80	1	0	0
ESTV_14384_462	A	80	1	0	0
GCR_cBin6121_Ctg1_367	A	68	0.85	0.001625	0.0403113
GCR_cBin6121_Ctg1_367	G	12	0.15	0.001625	0.0403113
ESTNV_17668_287	C	80	1	0	0
GCR_cBin40305_Ctg1_70	A	68	0.85	0.001625	0.0403113
GCR_cBin40305_Ctg1_70	C	12	0.15	0.001625	0.0403113
ESTNV_30479_547	A	2	0.025	0.000296875	0.0172301
ESTNV_30479_547	G	78	0.975	0.000296875	0.0172301
ESTNV_31404_229	G	80	1	0	0
ESTNV_30479_231	A	78	0.975	0.000296875	0.0172301
ESTNV_30479_231	G	2	0.025	0.000296875	0.0172301
GCR_cBin1265_Ctg1_271	A	77	0.9625	0.000433594	0.0208229
GCR_cBin1265_Ctg1_271	G	3	0.0375	0.000433594	0.0208229
ESTV_13564_420	A	80	1	0	0
ESTNV_33910_178	G	80	1	0	0
ESTNV_34839_90	A	13	0.1625	0.00168359	0.0410316
ESTNV_34839_90	C	67	0.8375	0.00168359	0.0410316
GCR_cBin10569_Ctg1_129	T	80	1	0	0
GCR_cBin9725_Ctg1_201	A	80	1	0	0
GCR_cBin1989_Ctg1_199	G	80	1	0	0
ESTNV_31700_458	A	80	1	0	0
ESTV_15483_482	A	80	1	0	0
ESTV_15483_319	C	80	1	0	0
ESTV_15483_283	A	80	1	0	0
ESTNV_33733_642	A	80	1	0	0
GCR_cBin13944_Ctg1_178	A	71	0.8875	0.00171484	0.0414107
GCR_cBin13944_Ctg1_178	G	9	0.1125	0.00171484	0.0414107
GCR_cBin25656_Ctg1_179	A	59	0.7375	0.00249609	0.0499609
GCR_cBin25656_Ctg1_179	G	21	0.2625	0.00249609	0.0499609
GCR_cBin41229_Ctg1_194	G	80	1	0	0
ESTNV_33473_135	A	1	0.0125	0.000152344	0.0123428
ESTNV_33473_135	T	79	0.9875	0.000152344	0.0123428
ESTV_21735_605	G	80	1	0	0
GCR_cBin3012_Ctg1_287	A	77	0.9625	0.000433594	0.0208229
GCR_cBin3012_Ctg1_287	G	3	0.0375	0.000433594	0.0208229
ESTNV_34441_695	C	49	0.6125	0.00265234	0.0515009
ESTNV_34441_695	G	31	0.3875	0.00265234	0.0515009
GCR_cBin23239_Ctg1_26	A	61	0.7625	0.00187109	0.0432561
GCR_cBin23239_Ctg1_26	G	19	0.2375	0.00187109	0.0432561
ESTNV_30427_157	G	80	1	0	0
ESTNV_35667_737	A	47	0.652778	0.00533158	0.0730176
ESTNV_35667_737	G	25	0.347222	0.00533158	0.0730176
GCR_cBin9838_Ctg1_90	A	39	0.4875	0.00296484	0.0544504
GCR_cBin9838_Ctg1_90	G	41	0.5125	0.00296484	0.0544504
ESTNV_37037_693	A	39	0.4875	0.00296484	0.0544504
ESTNV_37037_693	G	41	0.5125	0.00296484	0.0544504
ESTV_12974_407	A	50	0.625	0.00304688	0.0551985
ESTV_12974_407	G	30	0.375	0.00304688	0.0551985
ESTNV_24496_456	A	30	0.375	0.00304688	0.0551985
ESTNV_24496_456	G	50	0.625	0.00304688	0.0551985
ESTNV_31072_1031	A	19	0.2375	0.00187109	0.0432561
ESTNV_31072_1031	T	61	0.7625	0.00187109	0.0432561
ESTV_12974_300	G	80	1	0	0
ESTNV_31072_1221	A	80	1	0	0
GCR_cBin4748_Ctg1_165	A	39	0.4875	0.00296484	0.0544504
GCR_cBin4748_Ctg1_165	G	41	0.5125	0.00296484	0.0544504
ESTNV_36029_386	A	69	0.8625	0.00155859	0.039479
ESTNV_36029_386	C	11	0.1375	0.00155859	0.039479
GCR_cBin41664_Ctg1_107	A	30	0.375	0.00210938	0.0459279
GCR_cBin41664_Ctg1_107	G	50	0.625	0.00210938	0.0459279
ESTNV_33377_117	A	47	0.5875	0.00215234	0.0463934
ESTNV_33377_117	C	33	0.4125	0.00215234	0.0463934
ESTNV_32544_888	A	78	1	0	0
ESTV_16219_102	A	78	0.975	0.000296875	0.0172301
ESTV_16219_102	C	2	0.025	0.000296875	0.0172301
GCR_cBin24154_Ctg1_116	A	20	0.25	0.0015625	0.0395285
GCR_cBin24154_Ctg1_116	G	60	0.75	0.0015625	0.0395285
ESTNV_36125_1524	A	80	1	0	0
ESTNV_32977_454	A	32	0.4	0.0035	0.0591608
ESTNV_32977_454	G	48	0.6	0.0035	0.0591608
ESTNV_36125_1625	A	80	1	0	0
GCR_hBin36356_Ctg1_59	A	2	0.025	0.000609375	0.0246855
GCR_hBin36356_Ctg1_59	C	78	0.975	0.000609375	0.0246855
ESTNV_12926_381	C	80	1	0	0
ESTNV_31421_450	A	20	0.25	0.0021875	0.0467707
ESTNV_31421_450	G	60	0.75	0.0021875	0.0467707
ESTNV_25560_280	A	80	1	0	0
ESTNV_25560_563	A	80	1	0	0
ESTNV_36961_536	G	80	1	0	0
GCR_cBin35192_Ctg1_126	A	55	0.723684	0.00231903	0.0481563
GCR_cBin35192_Ctg1_126	G	21	0.276316	0.00231903	0.0481563
GCR_cBin37731_Ctg1_46	A	80	1	0	0
GCR_cBin42489_Ctg1_138	G	80	1	0	0
ESTNV_34292_856	A	25	0.3125	0.00271484	0.0521042
ESTNV_34292_856	G	55	0.6875	0.00271484	0.0521042
ESTNV_36824_935	C	75	0.9375	0.000683594	0.0261456
ESTNV_36824_935	G	5	0.0625	0.000683594	0.0261456
ESTNV_19820_181	G	80	1	0	0
GCR_cBin16481_Ctg1_303	C	69	0.884615	0.00113792	0.033733
GCR_cBin16481_Ctg1_303	G	9	0.115385	0.00113792	0.033733
GCR_cBin16481_Ctg1_250	A	70	0.875	0.00117187	0.0342327
GCR_cBin16481_Ctg1_250	G	10	0.125	0.00117187	0.0342327
ESTNV_35445_1459	G	80	1	0	0
BASS15_B7_D02_365	C	80	1	0	0
ESTNV_24131_116	A	80	1	0	0
GCR_cBin11254_Ctg1_609	G	80	1	0	0
GCR_cBin2792_Ctg2_200	A	80	1	0	0
GCR_cBin22326_Ctg1_100	C	80	1	0	0
ESTNV_37714_614	A	80	1	0	0
ESTNV_36439_150	A	80	1	0	0
GCR_cBin5664_Ctg1_209	A	80	1	0	0
ESTNV_34557_1347	A	80	1	0	0
GCR_cBin44576_Ctg1_193	A	80	1	0	0
GCR_cBin45714_Ctg1_104	A	32	0.4	0.0025625	0.0506211
GCR_cBin45714_Ctg1_104	G	48	0.6	0.0025625	0.0506211
GCR_cBin45714_Ctg1_163	A	32	0.4	0.0025625	0.0506211
GCR_cBin45714_Ctg1_163	G	48	0.6	0.0025625	0.0506211
GCR_cBin3879_Ctg2_509	A	47	0.618421	0.00292043	0.054041
GCR_cBin3879_Ctg2_509	G	29	0.381579	0.00292043	0.054041
GCR_cBin3879_Ctg2_583	A	27	0.3375	0.00230859	0.0480478
GCR_cBin3879_Ctg2_583	C	53	0.6625	0.00230859	0.0480478
ESTNV_24819_592	C	80	1	0	0
ESTNV_32405_190	A	34	0.425	0.00423438	0.0650721
ESTNV_32405_190	G	46	0.575	0.00423438	0.0650721
ESTV_14471_319	A	44	0.55	0.0036875	0.0607248
ESTV_14471_319	G	36	0.45	0.0036875	0.0607248
GCR_cBin12431_Ctg1_38	A	80	1	0	0
ESTNV_27336_508	C	80	1	0	0
GCR_hBin29120_Ctg1_93	A	80	1	0	0
GCR_cBin17643_Ctg1_30	A	65	0.8125	0.00177734	0.0421586
GCR_cBin17643_Ctg1_30	C	15	0.1875	0.00177734	0.0421586
ESTNV_36866_1976	C	23	0.294872	0.0022084	0.0469936
ESTNV_36866_1976	G	55	0.705128	0.0022084	0.0469936
ESTNV_36866_301	A	56	0.7	0.002125	0.0460977
ESTNV_36866_301	G	24	0.3	0.002125	0.0460977
ESTNV_27183_516	A	80	1	0	0
ESTNV_27883_555	G	80	1	0	0
ESTNV_24999_794	A	15	0.1875	0.00240234	0.0490137
ESTNV_24999_794	G	65	0.8125	0.00240234	0.0490137
GCR_cBin30724_Ctg1_45	T	80	1	0	0
ESTNV_27883_858	C	80	1	0	0
GCR_cBin41061_Ctg1_275	A	80	1	0	0
ESTNV_33585_602	A	4	0.05	0.0005625	0.0237171
ESTNV_33585_602	G	76	0.95	0.0005625	0.0237171
GCR_cBin1088_Ctg1_120	A	46	0.575	0.00235937	0.0485734
GCR_cBin1088_Ctg1_120	C	34	0.425	0.00235937	0.0485734
ESTNV_36276_161	A	34	0.425	0.00267188	0.0516902
ESTNV_36276_161	C	46	0.575	0.00267188	0.0516902
ESTNV_36026_1431	A	32	0.410256	0.00324517	0.0569664
ESTNV_36026_1431	G	46	0.589744	0.00324517	0.0569664
GCR_cBin1660_Ctg1_90	A	1	0.0125	0.000152344	0.0123428
GCR_cBin1660_Ctg1_90	C	79	0.9875	0.000152344	0.0123428
GCR_cBin48527_Ctg1_243	C	80	1	0	0
ESTNV_37606_918	A	5	0.0625	0.000683594	0.0261456
ESTNV_37606_918	G	75	0.9375	0.000683594	0.0261456
GCR_cBin46100_Ctg1_157	A	80	1	0	0
ESTNV_32645_328	A	12	0.15	0.001625	0.0403113
ESTNV_32645_328	G	68	0.85	0.001625	0.0403113
ESTV_15243_314	A	12	0.15	0.001625	0.0403113
ESTV_15243_314	G	68	0.85	0.001625	0.0403113
GCR_cBin30698_Ctg1_184	A	37	0.4625	0.00355859	0.0596539
GCR_cBin30698_Ctg1_184	G	43	0.5375	0.00355859	0.0596539
ESTNV_30512_474	A	14	0.175	0.00142187	0.0377078
ESTNV_30512_474	G	66	0.825	0.00142187	0.0377078
ESTV_14194_507	G	80	1	0	0
ESTNV_35530_507	G	80	1	0	0
ESTNV_30992_1251	A	4	0.05	0.0005625	0.0237171
ESTNV_30992_1251	G	76	0.95	0.0005625	0.0237171
ESTNV_33949_1357	A	80	1	0	0
GCR_cBin50513_Ctg1_37	A	76	0.95	0.0005625	0.0237171
GCR_cBin50513_Ctg1_37	T	4	0.05	0.0005625	0.0237171
ESTNV_21223_122	A	4	0.05	0.0005625	0.0237171
ESTNV_21223_122	G	76	0.95	0.0005625	0.0237171
ESTNV_28443_245	C	80	1	0	0
ESTNV_23548_82	A	70	0.875	0.00117187	0.0342327
ESTNV_23548_82	C	10	0.125	0.00117187	0.0342327
ESTNV_33402_1114	G	80	1	0	0
GCR_cBin14491_Ctg1_252	G	80	1	0	0
ESTNV_23548_451	A	22	0.275	0.00248438	0.0498435
ESTNV_23548_451	T	58	0.725	0.00248438	0.0498435
GCR_cBin2575_Ctg1_167	A	60	0.75	0.0025	0.05
GCR_cBin2575_Ctg1_167	G	20	0.25	0.0025	0.05
ESTV_14686_659	A	80	1	0	0
ESTV_14686_263	C	80	1	0	0
ESTV_16910_318	A	67	0.8375	0.00137109	0.0370283
ESTV_16910_318	G	13	0.1625	0.00137109	0.0370283
ESTV_16910_387	A	67	0.8375	0.00137109	0.0370283
ESTV_16910_387	C	13	0.1625	0.00137109	0.0370283
GCR_cBin7169_Ctg1_691	A	47	0.5875	0.00308984	0.0555864
GCR_cBin7169_Ctg1_691	G	33	0.4125	0.00308984	0.0555864
GCR_cBin14271_Ctg1_54	C	80	1	0	0
GCR_cBin8057_Ctg1_186	A	80	1	0	0
ESTNV_36052_1230	A	80	1	0	0
GCR_cBin5787_Ctg1_206	A	80	1	0	0
ESTNV_37033_464	C	36	0.45	0.0030625	0.0553399
ESTNV_37033_464	G	44	0.55	0.0030625	0.0553399
ESTNV_37033_615	A	44	0.55	0.0030625	0.0553399
ESTNV_37033_615	C	36	0.45	0.0030625	0.0553399
ESTV_16361_472	A	8	0.1	0.001	0.0316228
ESTV_16361_472	G	72	0.9	0.001	0.0316228
ESTV_15190_1379	C	80	1	0	0
ESTNV_35861_193	C	80	1	0	0
GCR_cBin21811_Ctg1_162	A	80	1	0	0
ESTNV_31658_433	A	9	0.1125	0.00108984	0.0330128
ESTNV_31658_433	T	71	0.8875	0.00108984	0.0330128
GCR_cBin17247_Ctg1_111	A	44	0.55	0.0036875	0.0607248
GCR_cBin17247_Ctg1_111	G	36	0.45	0.0036875	0.0607248
ESTV_17081_268	A	33	0.4125	0.00308984	0.0555864
ESTV_17081_268	G	47	0.5875	0.00308984	0.0555864
[truncated: 5,446 more rows]

## Sheet: LL_Pis
File S1. SNP allele frequencies per population. LL_SYS
SNP_ID	Allele	Count	Frequency	Variance	SD
GCR_cBin24032_Ctg1_76	T	74	1	0	0
GCR_cBin13749_Ctg1_18	A	27	0.3375	0.00199609	0.0446777
GCR_cBin13749_Ctg1_18	C	53	0.6625	0.00199609	0.0446777
ESTNV_28684_665	A	80	1	0	0
GCR_cBin32777_Ctg1_66	C	80	1	0	0
GCR_cBin13749_Ctg1_171	A	60	0.75	0.001875	0.0433013
GCR_cBin13749_Ctg1_171	G	20	0.25	0.001875	0.0433013
GCR_cBin22083_Ctg1_38	A	32	0.4	0.00225	0.0474342
GCR_cBin22083_Ctg1_38	C	48	0.6	0.00225	0.0474342
GCR_cBin7800_Ctg1_739	A	72	0.9	0.001	0.0316228
GCR_cBin7800_Ctg1_739	T	8	0.1	0.001	0.0316228
ESTV_16768_432	A	80	1	0	0
GCR_cBin42907_Ctg1_150	C	74	0.948718	0.00059003	0.0242905
GCR_cBin42907_Ctg1_150	G	4	0.0512821	0.00059003	0.0242905
GCR_rBin14981_Ctg1_193	A	63	0.7875	0.00277734	0.0527005
GCR_rBin14981_Ctg1_193	C	17	0.2125	0.00277734	0.0527005
ESTNV_26586_283	A	80	1	0	0
ESTNV_34251_1165	G	80	1	0	0
ESTNV_34453_617	A	43	0.5375	0.00324609	0.0569745
ESTNV_34453_617	G	37	0.4625	0.00324609	0.0569745
GCR_cBin5720_Ctg1_153	C	80	1	0	0
ESTV_13344_491	A	80	1	0	0
ESTNV_32810_1998	C	80	1	0	0
ESTV_12810_403	G	80	1	0	0
ESTV_12810_361	G	80	1	0	0
ESTNV_30347_550	T	80	1	0	0
ESTNV_27471_81	A	80	1	0	0
GCR_cBin23673_Ctg1_272	G	80	1	0	0
GCR_cBin49919_Ctg1_51	A	30	0.375	0.00210938	0.0459279
GCR_cBin49919_Ctg1_51	C	50	0.625	0.00210938	0.0459279
GCR_cBin3018_Ctg1_120	A	56	0.717949	0.00157622	0.0397017
GCR_cBin3018_Ctg1_120	G	22	0.282051	0.00157622	0.0397017
GCR_cBin3018_Ctg1_570	A	56	0.7	0.0018125	0.0425735
GCR_cBin3018_Ctg1_570	C	24	0.3	0.0018125	0.0425735
GCR_cBin3018_Ctg1_511	A	24	0.3	0.0018125	0.0425735
GCR_cBin3018_Ctg1_511	G	56	0.7	0.0018125	0.0425735
GCR_cBin8091_Ctg1_197	A	41	0.5125	0.00296484	0.0544504
GCR_cBin8091_Ctg1_197	T	39	0.4875	0.00296484	0.0544504
GCR_cBin8091_Ctg1_368	A	32	0.4	0.0031875	0.0564579
GCR_cBin8091_Ctg1_368	C	48	0.6	0.0031875	0.0564579
GCR_cBin38678_Ctg1_119	A	25	0.3125	0.00302734	0.0550213
GCR_cBin38678_Ctg1_119	G	55	0.6875	0.00302734	0.0550213
GCR_cBin26178_Ctg1_157	A	10	0.125	0.00117187	0.0342327
GCR_cBin26178_Ctg1_157	T	70	0.875	0.00117187	0.0342327
ESTNV_35287_375	A	35	0.4375	0.00318359	0.0564233
ESTNV_35287_375	G	45	0.5625	0.00318359	0.0564233
ESTNV_32999_885	A	73	0.9125	0.000902344	0.030039
ESTNV_32999_885	G	7	0.0875	0.000902344	0.030039
ESTV_13371_209	A	39	0.4875	0.00390234	0.0624687
ESTV_13371_209	C	41	0.5125	0.00390234	0.0624687
ESTNV_20700_631	A	7	0.0875	0.000902344	0.030039
ESTNV_20700_631	G	73	0.9125	0.000902344	0.030039
ESTNV_34751_1764	A	7	0.0875	0.000902344	0.030039
ESTNV_34751_1764	C	73	0.9125	0.000902344	0.030039
ESTNV_34751_1633	A	7	0.0875	0.000902344	0.030039
ESTNV_34751_1633	G	73	0.9125	0.000902344	0.030039
GCR_cBin4736_Ctg1_83	A	80	1	0	0
ESTNV_35283_192	A	74	0.925	0.000796875	0.028229
ESTNV_35283_192	C	6	0.075	0.000796875	0.028229
GCR_cBin30159_Ctg1_115	A	79	0.9875	0.000152344	0.0123428
GCR_cBin30159_Ctg1_115	G	1	0.0125	0.000152344	0.0123428
GCR_cBin20874_Ctg1_187	A	80	1	0	0
GCR_cBin7930_Ctg1_81	A	70	0.875	0.00117187	0.0342327
GCR_cBin7930_Ctg1_81	G	10	0.125	0.00117187	0.0342327
GCR_cBin12902_Ctg1_491	A	63	0.7875	0.00215234	0.0463934
GCR_cBin12902_Ctg1_491	G	17	0.2125	0.00215234	0.0463934
ESTNV_32983_812	A	79	0.9875	0.000152344	0.0123428
ESTNV_32983_812	G	1	0.0125	0.000152344	0.0123428
ESTV_11898_329	A	20	0.25	0.001875	0.0433013
ESTV_11898_329	G	60	0.75	0.001875	0.0433013
ESTV_11898_340	A	54	0.675	0.00235937	0.0485734
ESTV_11898_340	C	26	0.325	0.00235937	0.0485734
ESTNV_26718_947	G	80	1	0	0
ESTV_16673_1575	A	39	0.4875	0.00358984	0.0599153
ESTV_16673_1575	G	41	0.5125	0.00358984	0.0599153
GCR_cBin47076_Ctg1_116	A	18	0.225	0.00154688	0.0393303
GCR_cBin47076_Ctg1_116	G	62	0.775	0.00154688	0.0393303
GCR_cBin38737_Ctg1_101	A	10	0.125	0.00117187	0.0342327
GCR_cBin38737_Ctg1_101	G	70	0.875	0.00117187	0.0342327
GCR_cBin29198_Ctg1_37	A	62	0.775	0.00154688	0.0393303
GCR_cBin29198_Ctg1_37	C	18	0.225	0.00154688	0.0393303
GCR_cBin31010_Ctg1_231	C	80	1	0	0
GCR_cBin42440_Ctg1_139	A	20	0.25	0.0015625	0.0395285
GCR_cBin42440_Ctg1_139	G	60	0.75	0.0015625	0.0395285
ESTNV_32327_914	A	20	0.25	0.0015625	0.0395285
ESTNV_32327_914	G	60	0.75	0.0015625	0.0395285
GCR_hBin38301_Ctg1_117	T	80	1	0	0
ESTV_16226_67	A	80	1	0	0
GCR_cBin8657_Ctg1_79	A	80	1	0	0
ESTV_20115_337	G	80	1	0	0
GCR_cBin15162_Ctg1_205	A	4	0.05	0.0005625	0.0237171
GCR_cBin15162_Ctg1_205	C	76	0.95	0.0005625	0.0237171
GCR_cBin21922_Ctg1_271	A	60	0.75	0.0021875	0.0467707
GCR_cBin21922_Ctg1_271	G	20	0.25	0.0021875	0.0467707
GCR_cBin21922_Ctg1_272	A	20	0.25	0.0021875	0.0467707
GCR_cBin21922_Ctg1_272	C	60	0.75	0.0021875	0.0467707
ESTNV_28147_868	T	80	1	0	0
GCR_cBin17189_Ctg1_418	A	68	0.85	0.0013125	0.0362284
GCR_cBin17189_Ctg1_418	G	12	0.15	0.0013125	0.0362284
GCR_cBin34_Ctg1_596	A	77	0.9625	0.000433594	0.0208229
GCR_cBin34_Ctg1_596	C	3	0.0375	0.000433594	0.0208229
GCR_cBin2124_Ctg1_298	A	80	1	0	0
ESTNV_36830_1365	G	80	1	0	0
ESTV_16585_88	A	80	1	0	0
GCR_cBin33029_Ctg1_110	A	31	0.3875	0.00358984	0.0599153
GCR_cBin33029_Ctg1_110	G	49	0.6125	0.00358984	0.0599153
ESTNV_35593_589	A	80	1	0	0
GCR_cBin29162_Ctg1_328	A	73	0.9125	0.00121484	0.0348546
GCR_cBin29162_Ctg1_328	G	7	0.0875	0.00121484	0.0348546
GCR_cBin29853_Ctg1_324	A	31	0.3875	0.00358984	0.0599153
GCR_cBin29853_Ctg1_324	T	49	0.6125	0.00358984	0.0599153
GCR_cBin4502_Ctg2_241	C	5	0.0625	0.000683594	0.0261456
GCR_cBin4502_Ctg2_241	G	75	0.9375	0.000683594	0.0261456
ESTNV_35593_1402	A	35	0.4375	0.00287109	0.0535826
ESTNV_35593_1402	G	45	0.5625	0.00287109	0.0535826
GCR_cBin7483_Ctg1_160	A	73	0.9125	0.00121484	0.0348546
GCR_cBin7483_Ctg1_160	G	7	0.0875	0.00121484	0.0348546
GCR_hBin16230_Ctg1_42	G	80	1	0	0
ESTNV_35108_1142	A	25	0.3125	0.00271484	0.0521042
ESTNV_35108_1142	G	55	0.6875	0.00271484	0.0521042
ESTNV_32740_1792	T	80	1	0	0
ESTNV_18010_624	A	73	0.9125	0.00121484	0.0348546
ESTNV_18010_624	G	7	0.0875	0.00121484	0.0348546
ESTNV_33627_835	A	28	0.35	0.002875	0.053619
ESTNV_33627_835	G	52	0.65	0.002875	0.053619
ESTNV_33761_306	A	75	0.9375	0.000683594	0.0261456
ESTNV_33761_306	G	5	0.0625	0.000683594	0.0261456
ESTNV_35278_946	A	5	0.0625	0.000683594	0.0261456
ESTNV_35278_946	C	75	0.9375	0.000683594	0.0261456
ESTNV_32069_319	A	16	0.2	0.0018125	0.0425735
ESTNV_32069_319	C	64	0.8	0.0018125	0.0425735
GCR_cBin31757_Ctg1_238	A	5	0.0625	0.000683594	0.0261456
GCR_cBin31757_Ctg1_238	C	75	0.9375	0.000683594	0.0261456
ESTNV_34322_888	A	5	0.0625	0.000683594	0.0261456
ESTNV_34322_888	T	75	0.9375	0.000683594	0.0261456
ESTNV_13218_450	G	80	1	0	0
ESTV_19854_114	A	77	0.9625	0.000433594	0.0208229
ESTV_19854_114	C	3	0.0375	0.000433594	0.0208229
GCR_cBin40971_Ctg1_99	A	27	0.3375	0.00262109	0.0511966
GCR_cBin40971_Ctg1_99	C	53	0.6625	0.00262109	0.0511966
ESTNV_35964_989	A	72	0.9	0.001	0.0316228
ESTNV_35964_989	C	8	0.1	0.001	0.0316228
GCR_cBin18615_Ctg1_159	C	80	1	0	0
ESTNV_33535_713	C	80	1	0	0
GCR_cBin48650_Ctg1_186	A	80	1	0	0
ESTNV_36924_232	A	44	0.55	0.0018125	0.0425735
ESTNV_36924_232	C	36	0.45	0.0018125	0.0425735
ESTNV_36384_1752	A	80	1	0	0
ESTNV_35253_493	G	80	1	0	0
ESTNV_33535_853	G	80	1	0	0
GCR_cBin45827_Ctg1_60	C	80	1	0	0
ESTV_15080_392	A	74	0.925	0.000796875	0.028229
ESTV_15080_392	G	6	0.075	0.000796875	0.028229
GCR_cBin44622_Ctg1_29	A	51	0.653846	0.00169423	0.041161
GCR_cBin44622_Ctg1_29	G	27	0.346154	0.00169423	0.041161
GCR_cBin46385_Ctg1_67	G	80	1	0	0
GCR_cBin572_Ctg1_59	A	76	1	0	0
ESTNV_28108_776	C	80	1	0	0
ESTNV_35762_168	A	80	1	0	0
GCR_cBin46046_Ctg1_198	A	80	1	0	0
GCR_cBin33614_Ctg1_90	A	1	0.0125	0.000152344	0.0123428
GCR_cBin33614_Ctg1_90	G	79	0.9875	0.000152344	0.0123428
GCR_cBin17465_Ctg1_129	C	68	0.85	0.001625	0.0403113
GCR_cBin17465_Ctg1_129	G	12	0.15	0.001625	0.0403113
ESTNV_30075_59	A	8	0.1	0.001	0.0316228
ESTNV_30075_59	C	72	0.9	0.001	0.0316228
ESTV_21602_820	A	80	1	0	0
GCR_cBin43822_Ctg1_97	A	80	1	0	0
ESTNV_32753_1727	G	80	1	0	0
GCR_cBin45576_Ctg1_50	A	80	1	0	0
GCR_cBin1952_Ctg1_280	A	27	0.3375	0.00199609	0.0446777
GCR_cBin1952_Ctg1_280	G	53	0.6625	0.00199609	0.0446777
GCR_cBin38681_Ctg1_218	A	20	0.25641	0.0025877	0.0508695
GCR_cBin38681_Ctg1_218	C	58	0.74359	0.0025877	0.0508695
GCR_cBin6340_Ctg1_59	A	50	0.625	0.00210938	0.0459279
GCR_cBin6340_Ctg1_59	C	30	0.375	0.00210938	0.0459279
GCR_cBin11187_Ctg1_62	A	2	0.025	0.000296875	0.0172301
GCR_cBin11187_Ctg1_62	G	78	0.975	0.000296875	0.0172301
GCR_cBin7014_Ctg1_132	A	55	0.6875	0.00240234	0.0490137
GCR_cBin7014_Ctg1_132	G	25	0.3125	0.00240234	0.0490137
GCR_rBin10118_Ctg1_34	A	11	0.1375	0.00124609	0.0353001
GCR_rBin10118_Ctg1_34	G	69	0.8625	0.00124609	0.0353001
ESTNV_34021_1870	G	80	1	0	0
ESTNV_32103_191	C	80	1	0	0
GCR_cBin42179_Ctg1_389	C	69	0.8625	0.00124609	0.0353001
GCR_cBin42179_Ctg1_389	G	11	0.1375	0.00124609	0.0353001
GCR_cBin43281_Ctg1_51	A	11	0.1375	0.00124609	0.0353001
GCR_cBin43281_Ctg1_51	G	69	0.8625	0.00124609	0.0353001
GCR_cBin52844_Ctg1_180	G	80	1	0	0
GCR_cBin42179_Ctg1_350	A	11	0.1375	0.00124609	0.0353001
GCR_cBin42179_Ctg1_350	G	69	0.8625	0.00124609	0.0353001
GCR_cBin37910_Ctg1_93	A	62	0.775	0.00185937	0.0431205
GCR_cBin37910_Ctg1_93	G	18	0.225	0.00185937	0.0431205
GCR_cBin30294_Ctg1_36	C	23	0.294872	0.0022084	0.0469936
GCR_cBin30294_Ctg1_36	G	55	0.705128	0.0022084	0.0469936
ESTNV_28987_832	A	59	0.7375	0.00249609	0.0499609
ESTNV_28987_832	C	21	0.2625	0.00249609	0.0499609
GCR_cBin38428_Ctg1_72	A	80	1	0	0
GCR_cBin30905_Ctg1_38	C	80	1	0	0
ESTNV_30484_927	A	39	0.4875	0.00233984	0.0483719
ESTNV_30484_927	C	41	0.5125	0.00233984	0.0483719
GCR_cBin28586_Ctg1_147	A	80	1	0	0
ESTNV_33760_518	C	42	0.525	0.00279687	0.0528855
ESTNV_33760_518	G	38	0.475	0.00279687	0.0528855
GCR_cBin17730_Ctg1_232	A	43	0.5375	0.00293359	0.0541627
GCR_cBin17730_Ctg1_232	C	37	0.4625	0.00293359	0.0541627
GCR_cBin23510_Ctg1_150	A	43	0.5375	0.00293359	0.0541627
GCR_cBin23510_Ctg1_150	G	37	0.4625	0.00293359	0.0541627
GCR_cBin43132_Ctg1_139	A	43	0.5375	0.00293359	0.0541627
GCR_cBin43132_Ctg1_139	G	37	0.4625	0.00293359	0.0541627
ESTNV_33875_378	G	80	1	0	0
ESTNV_35486_240	G	80	1	0	0
ESTNV_35163_1993	A	75	0.9375	0.000683594	0.0261456
ESTNV_35163_1993	T	5	0.0625	0.000683594	0.0261456
ESTNV_35486_738	A	80	1	0	0
GCR_cBin12492_Ctg1_178	G	80	1	0	0
ESTNV_35486_385	C	15	0.1875	0.00146484	0.0382733
ESTNV_35486_385	G	65	0.8125	0.00146484	0.0382733
GCR_hBin7576_Ctg1_138	G	80	1	0	0
GCR_cBin12492_Ctg1_183	G	80	1	0	0
ESTNV_26437_1349	A	80	1	0	0
GCR_cBin10658_Ctg1_107	G	80	1	0	0
GCR_cBin33592_Ctg1_241	A	5	0.0625	0.000683594	0.0261456
GCR_cBin33592_Ctg1_241	G	75	0.9375	0.000683594	0.0261456
ESTNV_33888_314	G	80	1	0	0
GCR_cBin10390_Ctg1_228	A	27	0.3375	0.00230859	0.0480478
GCR_cBin10390_Ctg1_228	C	53	0.6625	0.00230859	0.0480478
ESTV_12221_170	A	80	1	0	0
GCR_cBin26140_Ctg1_118	A	41	0.5125	0.00327734	0.0572481
GCR_cBin26140_Ctg1_118	G	39	0.4875	0.00327734	0.0572481
GCR_cBin1019_Ctg1_221	A	19	0.25	0.00164474	0.0405554
GCR_cBin1019_Ctg1_221	G	57	0.75	0.00164474	0.0405554
GCR_cBin26140_Ctg1_33	A	40	0.5	0.003125	0.0559017
GCR_cBin26140_Ctg1_33	T	40	0.5	0.003125	0.0559017
ESTNV_27182_609	G	80	1	0	0
GCR_cBin27812_Ctg1_148	A	76	0.95	0.0005625	0.0237171
GCR_cBin27812_Ctg1_148	G	4	0.05	0.0005625	0.0237171
GCR_cBin26855_Ctg1_110	A	35	0.4375	0.00318359	0.0564233
GCR_cBin26855_Ctg1_110	C	45	0.5625	0.00318359	0.0564233
GCR_cBin39664_Ctg1_85	A	56	0.7	0.00275	0.0524404
GCR_cBin39664_Ctg1_85	G	24	0.3	0.00275	0.0524404
GCR_cBin38208_Ctg1_21	A	71	0.8875	0.00202734	0.045026
GCR_cBin38208_Ctg1_21	T	9	0.1125	0.00202734	0.045026
ESTV_15118_153	A	80	1	0	0
GCR_cBin47268_Ctg1_70	A	80	1	0	0
GCR_cBin47268_Ctg1_73	G	80	1	0	0
ESTNV_34296_693	A	80	1	0	0
GCR_cBin18023_Ctg1_41	C	64	0.8	0.002125	0.0460977
GCR_cBin18023_Ctg1_41	G	16	0.2	0.002125	0.0460977
ESTNV_36480_1354	A	55	0.6875	0.00177734	0.0421586
ESTNV_36480_1354	T	25	0.3125	0.00177734	0.0421586
GCR_cBin34894_Ctg1_621	G	80	1	0	0
GCR_cBin26436_Ctg1_42	A	42	0.525	0.00279687	0.0528855
GCR_cBin26436_Ctg1_42	G	38	0.475	0.00279687	0.0528855
GCR_cBin24398_Ctg1_117	G	80	1	0	0
GCR_cBin3706_Ctg1_364	A	11	0.1375	0.00124609	0.0353001
GCR_cBin3706_Ctg1_364	G	69	0.8625	0.00124609	0.0353001
GCR_cBin23307_Ctg1_194	C	80	1	0	0
GCR_cBin12132_Ctg1_186	G	80	1	0	0
GCR_cBin5178_Ctg1_86	G	80	1	0	0
GCR_cBin12749_Ctg1_233	A	15	0.1875	0.00177734	0.0421586
GCR_cBin12749_Ctg1_233	G	65	0.8125	0.00177734	0.0421586
GCR_cBin45817_Ctg1_71	A	4	0.05	0.0005625	0.0237171
GCR_cBin45817_Ctg1_71	G	76	0.95	0.0005625	0.0237171
ESTNV_26350_156	C	38	0.475	0.00279687	0.0528855
ESTNV_26350_156	G	42	0.525	0.00279687	0.0528855
ESTNV_21694_208	A	1	0.0125	0.000152344	0.0123428
ESTNV_21694_208	G	79	0.9875	0.000152344	0.0123428
ESTNV_29851_266	A	80	1	0	0
GCR_cBin19407_Ctg1_54	A	80	1	0	0
GCR_cBin12450_Ctg1_432	C	80	1	0	0
ESTV_14230_80	A	7	0.0875	0.000902344	0.030039
ESTV_14230_80	C	73	0.9125	0.000902344	0.030039
GCR_cBin5917_Ctg1_208	A	1	0.0125	0.000152344	0.0123428
GCR_cBin5917_Ctg1_208	G	79	0.9875	0.000152344	0.0123428
GCR_cBin1185_Ctg1_145	G	80	1	0	0
GCR_hBin21729_Ctg1_51	A	78	0.975	0.000296875	0.0172301
GCR_hBin21729_Ctg1_51	G	2	0.025	0.000296875	0.0172301
GCR_cBin37146_Ctg1_312	G	78	1	0	0
GCR_cBin5718_Ctg1_42	A	72	0.9	0.001	0.0316228
GCR_cBin5718_Ctg1_42	G	8	0.1	0.001	0.0316228
GCR_cBin32973_Ctg1_81	A	60	0.75	0.003125	0.0559017
GCR_cBin32973_Ctg1_81	C	20	0.25	0.003125	0.0559017
GCR_cBin32973_Ctg1_29	A	60	0.75	0.003125	0.0559017
GCR_cBin32973_Ctg1_29	G	20	0.25	0.003125	0.0559017
ESTNV_22623_238	A	37	0.4625	0.00230859	0.0480478
ESTNV_22623_238	G	43	0.5375	0.00230859	0.0480478
GCR_cBin35013_Ctg1_144	A	11	0.1375	0.00155859	0.039479
GCR_cBin35013_Ctg1_144	G	69	0.8625	0.00155859	0.039479
ESTNV_33390_1703	A	61	0.7625	0.00249609	0.0499609
ESTNV_33390_1703	G	19	0.2375	0.00249609	0.0499609
GCR_cBin28945_Ctg1_147	A	10	0.125	0.00117187	0.0342327
GCR_cBin28945_Ctg1_147	G	70	0.875	0.00117187	0.0342327
ESTNV_35898_1062	A	54	0.675	0.00235937	0.0485734
ESTNV_35898_1062	G	26	0.325	0.00235937	0.0485734
GCR_cBin26038_Ctg1_203	A	43	0.5375	0.00387109	0.0622181
GCR_cBin26038_Ctg1_203	G	37	0.4625	0.00387109	0.0622181
GCR_cBin5440_Ctg1_39	A	73	0.9125	0.00121484	0.0348546
GCR_cBin5440_Ctg1_39	T	7	0.0875	0.00121484	0.0348546
GCR_cBin32127_Ctg1_234	G	80	1	0	0
GCR_hBin19696_Ctg1_47	G	80	1	0	0
GCR_cBin32127_Ctg1_245	A	80	1	0	0
ESTNV_27431_454	A	79	0.9875	0.000152344	0.0123428
ESTNV_27431_454	G	1	0.0125	0.000152344	0.0123428
BASS14_B7_A02_640	A	80	1	0	0
GCR_cBin41946_Ctg1_167	A	62	0.775	0.00248438	0.0498435
GCR_cBin41946_Ctg1_167	G	18	0.225	0.00248438	0.0498435
GCR_cBin41946_Ctg1_89	C	62	0.775	0.00248438	0.0498435
GCR_cBin41946_Ctg1_89	G	18	0.225	0.00248438	0.0498435
ESTNV_16068_255	C	75	0.9375	0.000683594	0.0261456
ESTNV_16068_255	G	5	0.0625	0.000683594	0.0261456
GCR_cBin49053_Ctg1_111	A	19	0.2375	0.00374609	0.0612053
GCR_cBin49053_Ctg1_111	G	61	0.7625	0.00374609	0.0612053
ESTNV_35810_833	A	23	0.2875	0.00277734	0.0527005
ESTNV_35810_833	C	57	0.7125	0.00277734	0.0527005
GCR_hBin18139_Ctg1_60	A	63	0.7875	0.00152734	0.0390812
GCR_hBin18139_Ctg1_60	C	17	0.2125	0.00152734	0.0390812
GCR_hBin18139_Ctg1_230	A	63	0.7875	0.00152734	0.0390812
GCR_hBin18139_Ctg1_230	G	17	0.2125	0.00152734	0.0390812
ESTNV_35810_643	C	80	1	0	0
ESTNV_17527_71	G	80	1	0	0
ESTNV_28091_630	A	64	0.8	0.0018125	0.0425735
ESTNV_28091_630	G	16	0.2	0.0018125	0.0425735
ESTNV_25175_634	T	80	1	0	0
GCR_cBin25193_Ctg1_80	A	79	0.9875	0.000152344	0.0123428
GCR_cBin25193_Ctg1_80	G	1	0.0125	0.000152344	0.0123428
ESTNV_27318_155	A	80	1	0	0
GCR_cBin1418_Ctg1_135	C	80	1	0	0
ESTNV_31116_191	A	28	0.35	0.002875	0.053619
ESTNV_31116_191	T	52	0.65	0.002875	0.053619
ESTNV_25321_192	A	9	0.115385	0.00146665	0.0382968
ESTNV_25321_192	G	69	0.884615	0.00146665	0.0382968
ESTNV_29115_481	A	6	0.075	0.000796875	0.028229
ESTNV_29115_481	C	74	0.925	0.000796875	0.028229
GCR_cBin19598_Ctg1_176	A	29	0.3625	0.00312109	0.0558667
GCR_cBin19598_Ctg1_176	G	51	0.6375	0.00312109	0.0558667
ESTNV_31863_1602	A	1	0.0125	0.000152344	0.0123428
ESTNV_31863_1602	T	79	0.9875	0.000152344	0.0123428
GCR_cBin545_Ctg1_206	A	6	0.075	0.000796875	0.028229
GCR_cBin545_Ctg1_206	C	74	0.925	0.000796875	0.028229
BASS11_B7_G05_472	A	6	0.075	0.000796875	0.028229
BASS11_B7_G05_472	C	74	0.925	0.000796875	0.028229
GCR_cBin17574_Ctg1_128	A	8	0.1	0.001	0.0316228
GCR_cBin17574_Ctg1_128	C	72	0.9	0.001	0.0316228
BASS11_B7_G05_384	A	28	0.35	0.002875	0.053619
BASS11_B7_G05_384	C	52	0.65	0.002875	0.053619
BASS11_B7_G05_691	A	6	0.075	0.000796875	0.028229
BASS11_B7_G05_691	C	74	0.925	0.000796875	0.028229
ESTNV_23544_330	C	76	1	0	0
BASS117_B7_E04_685	G	80	1	0	0
BASS117_B7_E04_554	A	80	1	0	0
GCR_cBin50585_Ctg1_139	C	59	0.797297	0.00272442	0.052196
GCR_cBin50585_Ctg1_139	G	15	0.202703	0.00272442	0.052196
GCR_cBin37317_Ctg1_131	C	73	0.9125	0.000902344	0.030039
GCR_cBin37317_Ctg1_131	G	7	0.0875	0.000902344	0.030039
ESTNV_33213_337	T	80	1	0	0
GCR_hBin35252_Ctg1_84	A	64	0.8	0.0015	0.0387298
GCR_hBin35252_Ctg1_84	G	16	0.2	0.0015	0.0387298
GCR_cBin6519_Ctg1_383	C	79	0.9875	0.000152344	0.0123428
GCR_cBin6519_Ctg1_383	G	1	0.0125	0.000152344	0.0123428
GCR_cBin6519_Ctg1_116	T	80	1	0	0
GCR_cBin16390_Ctg1_172	A	80	1	0	0
ESTNV_30332_660	G	80	1	0	0
GCR_cBin37317_Ctg1_184	A	69	0.8625	0.00124609	0.0353001
GCR_cBin37317_Ctg1_184	G	11	0.1375	0.00124609	0.0353001
GCR_cBin16390_Ctg1_190	C	80	1	0	0
ESTNV_34569_1252	A	41	0.5125	0.00358984	0.0599153
ESTNV_34569_1252	C	39	0.4875	0.00358984	0.0599153
ESTV_14468_119	A	41	0.5125	0.00358984	0.0599153
ESTV_14468_119	G	39	0.4875	0.00358984	0.0599153
ESTV_18722_351	A	51	0.6375	0.00218359	0.0467289
ESTV_18722_351	G	29	0.3625	0.00218359	0.0467289
ESTNV_36348_720	A	69	0.8625	0.00124609	0.0353001
ESTNV_36348_720	C	11	0.1375	0.00124609	0.0353001
ESTNV_28229_1264	A	40	0.5	0.0034375	0.0586302
ESTNV_28229_1264	G	40	0.5	0.0034375	0.0586302
ESTNV_34569_753	A	41	0.5125	0.00358984	0.0599153
ESTNV_34569_753	C	39	0.4875	0.00358984	0.0599153
ESTNV_33934_55	A	21	0.2625	0.00218359	0.0467289
ESTNV_33934_55	C	59	0.7375	0.00218359	0.0467289
BASS115_B6A_H02_496	A	56	0.7	0.00275	0.0524404
BASS115_B6A_H02_496	C	24	0.3	0.00275	0.0524404
GCR_cBin15671_Ctg1_125	A	5	0.0625	0.000683594	0.0261456
GCR_cBin15671_Ctg1_125	T	75	0.9375	0.000683594	0.0261456
GCR_cBin48621_Ctg1_143	A	4	0.05	0.0005625	0.0237171
GCR_cBin48621_Ctg1_143	C	76	0.95	0.0005625	0.0237171
ESTNV_36486_673	C	76	0.95	0.0005625	0.0237171
ESTNV_36486_673	G	4	0.05	0.0005625	0.0237171
GCR_cBin26183_Ctg1_163	A	28	0.35	0.0031875	0.0564579
GCR_cBin26183_Ctg1_163	G	52	0.65	0.0031875	0.0564579
GCR_cBin48621_Ctg1_146	A	76	0.95	0.0005625	0.0237171
GCR_cBin48621_Ctg1_146	G	4	0.05	0.0005625	0.0237171
ESTNV_31699_1208	C	80	1	0	0
ESTNV_36170_1803	A	2	0.025	0.000296875	0.0172301
ESTNV_36170_1803	G	78	0.975	0.000296875	0.0172301
ESTNV_26803_666	A	2	0.025	0.000296875	0.0172301
ESTNV_26803_666	G	78	0.975	0.000296875	0.0172301
GCR_cBin24983_Ctg1_211	A	23	0.2875	0.00246484	0.0496472
GCR_cBin24983_Ctg1_211	C	57	0.7125	0.00246484	0.0496472
GCR_cBin33457_Ctg1_198	A	68	0.85	0.0013125	0.0362284
GCR_cBin33457_Ctg1_198	C	12	0.15	0.0013125	0.0362284
GCR_cBin38774_Ctg1_204	C	30	0.375	0.00273437	0.0522913
GCR_cBin38774_Ctg1_204	G	50	0.625	0.00273437	0.0522913
ESTNV_36426_226	A	4	0.05	0.0005625	0.0237171
ESTNV_36426_226	G	76	0.95	0.0005625	0.0237171
GCR_cBin33503_Ctg1_290	A	36	0.45	0.003375	0.0580948
GCR_cBin33503_Ctg1_290	G	44	0.55	0.003375	0.0580948
ESTV_15074_164	A	7	0.0875	0.000902344	0.030039
ESTV_15074_164	G	73	0.9125	0.000902344	0.030039
ESTNV_36002_1472	A	1	0.0125	0.000152344	0.0123428
ESTNV_36002_1472	G	79	0.9875	0.000152344	0.0123428
ESTNV_15285_387	C	69	0.8625	0.00124609	0.0353001
ESTNV_15285_387	G	11	0.1375	0.00124609	0.0353001
GCR_cBin27216_Ctg1_405	G	80	1	0	0
GCR_cBin8947_Ctg1_161	A	61	0.7625	0.00187109	0.0432561
GCR_cBin8947_Ctg1_161	G	19	0.2375	0.00187109	0.0432561
GCR_cBin33503_Ctg1_345	A	76	1	0	0
GCR_cBin48593_Ctg1_152	A	17	0.2125	0.00183984	0.0428934
GCR_cBin48593_Ctg1_152	C	63	0.7875	0.00183984	0.0428934
GCR_cBin47309_Ctg1_158	C	80	1	0	0
GCR_hBin21216_Ctg1_199	A	80	1	0	0
GCR_cBin31719_Ctg1_177	A	80	1	0	0
GCR_cBin19824_Ctg1_145	A	8	0.1	0.001	0.0316228
GCR_cBin19824_Ctg1_145	G	72	0.9	0.001	0.0316228
ESTNV_25685_546	A	19	0.2375	0.00187109	0.0432561
ESTNV_25685_546	G	61	0.7625	0.00187109	0.0432561
ESTNV_33470_753	A	38	0.475	0.00248438	0.0498435
ESTNV_33470_753	G	42	0.525	0.00248438	0.0498435
ESTNV_27944_196	A	77	0.9625	0.000433594	0.0208229
ESTNV_27944_196	T	3	0.0375	0.000433594	0.0208229
ESTNV_36724_118	A	76	0.95	0.0005625	0.0237171
ESTNV_36724_118	G	4	0.05	0.0005625	0.0237171
ESTNV_35192_247	A	8	0.1	0.001	0.0316228
ESTNV_35192_247	T	72	0.9	0.001	0.0316228
BASS114_B6A_B06_105	A	80	1	0	0
ESTNV_35192_126	A	36	0.45	0.0030625	0.0553399
ESTNV_35192_126	C	44	0.55	0.0030625	0.0553399
GCR_cBin25759_Ctg1_44	G	80	1	0	0
GCR_cBin29181_Ctg1_51	A	6	0.075	0.000796875	0.028229
GCR_cBin29181_Ctg1_51	T	74	0.925	0.000796875	0.028229
ESTV_17694_278	A	1	0.0125	0.000152344	0.0123428
ESTV_17694_278	G	79	0.9875	0.000152344	0.0123428
GCR_cBin698_Ctg1_258	A	79	0.9875	0.000152344	0.0123428
GCR_cBin698_Ctg1_258	T	1	0.0125	0.000152344	0.0123428
GCR_cBin698_Ctg1_256	A	1	0.0125	0.000152344	0.0123428
GCR_cBin698_Ctg1_256	T	79	0.9875	0.000152344	0.0123428
GCR_cBin698_Ctg1_215	A	79	0.9875	0.000152344	0.0123428
GCR_cBin698_Ctg1_215	G	1	0.0125	0.000152344	0.0123428
GCR_cBin698_Ctg1_125	A	39	0.4875	0.00296484	0.0544504
GCR_cBin698_Ctg1_125	G	41	0.5125	0.00296484	0.0544504
ESTNV_34783_687	A	66	0.825	0.00142187	0.0377078
ESTNV_34783_687	G	14	0.175	0.00142187	0.0377078
GCR_cBin705_Ctg1_218	A	63	0.7875	0.00183984	0.0428934
GCR_cBin705_Ctg1_218	G	17	0.2125	0.00183984	0.0428934
GCR_cBin705_Ctg1_366	A	17	0.2125	0.00183984	0.0428934
GCR_cBin705_Ctg1_366	G	63	0.7875	0.00183984	0.0428934
GCR_cBin705_Ctg1_123	G	80	1	0	0
GCR_cBin19367_Ctg1_143	G	80	1	0	0
ESTV_15107_389	G	80	1	0	0
ESTNV_36706_574	A	80	1	0	0
ESTNV_27242_211	C	18	0.225	0.00185937	0.0431205
ESTNV_27242_211	G	62	0.775	0.00185937	0.0431205
ESTV_20675_499	G	80	1	0	0
GCR_cBin8347_Ctg1_155	A	67	0.858974	0.00129807	0.0360287
GCR_cBin8347_Ctg1_155	T	11	0.141026	0.00129807	0.0360287
GCR_hBin46188_Ctg1_237	A	59	0.7375	0.00280859	0.0529962
GCR_hBin46188_Ctg1_237	T	21	0.2625	0.00280859	0.0529962
GCR_cBin28712_Ctg1_124	A	16	0.2	0.0015	0.0387298
GCR_cBin28712_Ctg1_124	C	64	0.8	0.0015	0.0387298
GCR_hBin44277_Ctg1_106	A	21	0.2625	0.00249609	0.0499609
GCR_hBin44277_Ctg1_106	C	59	0.7375	0.00249609	0.0499609
ESTNV_36490_690	C	80	1	0	0
ESTV_21365_54	A	80	1	0	0
ESTNV_30166_762	C	80	1	0	0
ESTNV_26125_188	C	80	1	0	0
ESTNV_35823_463	C	80	1	0	0
GCR_cBin42387_Ctg1_56	A	80	1	0	0
ESTNV_36853_78	C	6	0.075	0.000796875	0.028229
ESTNV_36853_78	G	74	0.925	0.000796875	0.028229
ESTNV_27947_584	A	74	0.925	0.000796875	0.028229
ESTNV_27947_584	T	6	0.075	0.000796875	0.028229
ESTNV_34937_1396	C	80	1	0	0
GCR_cBin21639_Ctg1_129	G	80	1	0	0
GCR_cBin13830_Ctg1_156	A	80	1	0	0
GCR_cBin9325_Ctg1_629	C	80	1	0	0
ESTNV_28515_410	G	80	1	0	0
ESTNV_26964_711	A	49	0.628205	0.0022084	0.0469936
ESTNV_26964_711	G	29	0.371795	0.0022084	0.0469936
GCR_cBin40533_Ctg1_184	A	76	0.95	0.0005625	0.0237171
GCR_cBin40533_Ctg1_184	G	4	0.05	0.0005625	0.0237171
ESTNV_26964_592	A	55	0.6875	0.00208984	0.0457148
ESTNV_26964_592	G	25	0.3125	0.00208984	0.0457148
GCR_cBin35156_Ctg1_47	A	2	0.025	0.000296875	0.0172301
GCR_cBin35156_Ctg1_47	G	78	0.975	0.000296875	0.0172301
ESTNV_24363_306	A	25	0.3125	0.00302734	0.0550213
ESTNV_24363_306	C	55	0.6875	0.00302734	0.0550213
ESTNV_32353_1231	A	71	0.8875	0.00108984	0.0330128
ESTNV_32353_1231	C	9	0.1125	0.00108984	0.0330128
GCR_cBin9554_Ctg1_111	A	13	0.1625	0.00137109	0.0370283
GCR_cBin9554_Ctg1_111	C	67	0.8375	0.00137109	0.0370283
GCR_cBin23594_Ctg1_69	A	79	0.9875	0.000152344	0.0123428
GCR_cBin23594_Ctg1_69	C	1	0.0125	0.000152344	0.0123428
GCR_cBin7278_Ctg1_101	A	63	0.7875	0.00183984	0.0428934
GCR_cBin7278_Ctg1_101	C	17	0.2125	0.00183984	0.0428934
GCR_cBin7278_Ctg1_140	A	63	0.7875	0.00183984	0.0428934
GCR_cBin7278_Ctg1_140	G	17	0.2125	0.00183984	0.0428934
GCR_cBin42013_Ctg1_64	A	80	1	0	0
ESTNV_30341_1348	A	76	0.95	0.0005625	0.0237171
ESTNV_30341_1348	T	4	0.05	0.0005625	0.0237171
GCR_cBin17069_Ctg1_53	A	47	0.5875	0.00246484	0.0496472
GCR_cBin17069_Ctg1_53	G	33	0.4125	0.00246484	0.0496472
GCR_cBin630_Ctg1_411	G	80	1	0	0
GCR_cBin43670_Ctg1_77	A	23	0.2875	0.00277734	0.0527005
GCR_cBin43670_Ctg1_77	G	57	0.7125	0.00277734	0.0527005
ESTV_15992_330	A	80	1	0	0
ESTNV_28270_603	A	46	0.575	0.00267188	0.0516902
ESTNV_28270_603	G	34	0.425	0.00267188	0.0516902
ESTNV_35703_1395	G	80	1	0	0
ESTNV_24638_210	C	80	1	0	0
ESTNV_36373_1935	A	80	1	0	0
ESTNV_27268_490	A	80	1	0	0
ESTNV_35486_1270	A	4	0.05	0.0005625	0.0237171
ESTNV_35486_1270	G	76	0.95	0.0005625	0.0237171
GCR_cBin36565_Ctg1_226	A	15	0.192308	0.00184595	0.0429645
GCR_cBin36565_Ctg1_226	G	63	0.807692	0.00184595	0.0429645
GCR_cBin10083_Ctg1_32	A	64	0.842105	0.00176775	0.0420446
GCR_cBin10083_Ctg1_32	G	12	0.157895	0.00176775	0.0420446
GCR_cBin21674_Ctg1_331	T	72	1	0	0
ESTV_13245_584	C	80	1	0	0
ESTNV_33113_353	A	13	0.1625	0.00137109	0.0370283
ESTNV_33113_353	C	67	0.8375	0.00137109	0.0370283
GCR_hBin21729_Ctg1_168	A	2	0.025	0.000296875	0.0172301
GCR_hBin21729_Ctg1_168	G	78	0.975	0.000296875	0.0172301
GCR_hBin43280_Ctg1_61	A	68	0.85	0.0013125	0.0362284
GCR_hBin43280_Ctg1_61	C	12	0.15	0.0013125	0.0362284
ESTV_15739_295	G	80	1	0	0
ESTNV_34055_242	G	80	1	0	0
ESTV_16262_1716	A	68	0.85	0.0013125	0.0362284
ESTV_16262_1716	G	12	0.15	0.0013125	0.0362284
ESTNV_25199_261	A	75	0.961538	0.000455166	0.0213346
ESTNV_25199_261	C	3	0.0384615	0.000455166	0.0213346
GCR_cBin17416_Ctg1_223	C	80	1	0	0
GCR_hBin17624_Ctg1_81	C	80	1	0	0
GCR_cBin19146_Ctg1_97	G	80	1	0	0
ESTV_17233_535	G	80	1	0	0
ESTNV_23531_462	C	53	0.6625	0.00168359	0.0410316
ESTNV_23531_462	G	27	0.3375	0.00168359	0.0410316
ESTV_7881_334	A	50	0.625	0.00210938	0.0459279
ESTV_7881_334	G	30	0.375	0.00210938	0.0459279
GCR_cBin25027_Ctg1_137	A	45	0.576923	0.00247813	0.0497808
GCR_cBin25027_Ctg1_137	G	33	0.423077	0.00247813	0.0497808
GCR_cBin41451_Ctg1_172	A	80	1	0	0
ESTNV_32366_632	G	80	1	0	0
ESTNV_29209_356	A	80	1	0	0
ESTNV_36510_599	A	8	0.1	0.001	0.0316228
ESTNV_36510_599	G	72	0.9	0.001	0.0316228
ESTV_15688_494	A	74	0.925	0.000796875	0.028229
ESTV_15688_494	G	6	0.075	0.000796875	0.028229
ESTNV_30757_471	G	80	1	0	0
GCR_cBin3256_Ctg1_63	A	43	0.5375	0.00262109	0.0511966
GCR_cBin3256_Ctg1_63	C	37	0.4625	0.00262109	0.0511966
GCR_cBin836_Ctg1_394	A	39	0.4875	0.00390234	0.0624687
GCR_cBin836_Ctg1_394	C	41	0.5125	0.00390234	0.0624687
ESTNV_35640_75	C	68	0.85	0.0013125	0.0362284
ESTNV_35640_75	G	12	0.15	0.0013125	0.0362284
GCR_cBin48467_Ctg1_35	A	79	0.9875	0.000152344	0.0123428
GCR_cBin48467_Ctg1_35	C	1	0.0125	0.000152344	0.0123428
ESTNV_23431_381	A	5	0.0625	0.000996094	0.031561
ESTNV_23431_381	G	75	0.9375	0.000996094	0.031561
ESTNV_37039_99	A	58	0.725	0.00217188	0.0466034
ESTNV_37039_99	G	22	0.275	0.00217188	0.0466034
GCR_cBin1859_Ctg1_276	G	80	1	0	0
GCR_cBin11134_Ctg1_164	G	80	1	0	0
GCR_cBin11134_Ctg1_43	G	80	1	0	0
GCR_cBin4983_Ctg1_416	A	80	1	0	0
GCR_cBin18961_Ctg1_75	C	28	0.35	0.00225	0.0474342
GCR_cBin18961_Ctg1_75	G	52	0.65	0.00225	0.0474342
ESTV_8181_51	A	61	0.7625	0.00187109	0.0432561
ESTV_8181_51	G	19	0.2375	0.00187109	0.0432561
ESTNV_26621_493	A	80	1	0	0
ESTNV_23711_205	A	80	1	0	0
ESTV_17538_85	A	80	1	0	0
GCR_cBin2733_Ctg1_528	A	80	1	0	0
ESTNV_33243_1092	A	45	0.5625	0.00224609	0.047393
ESTNV_33243_1092	G	35	0.4375	0.00224609	0.047393
ESTNV_25889_239	A	80	1	0	0
ESTNV_33243_235	A	80	1	0	0
GCR_cBin32739_Ctg1_78	A	80	1	0	0
ESTNV_29403_553	A	11	0.1375	0.00124609	0.0353001
ESTNV_29403_553	G	69	0.8625	0.00124609	0.0353001
GCR_cBin25248_Ctg1_228	C	80	1	0	0
ESTNV_34987_849	C	80	1	0	0
ESTNV_34987_996	G	80	1	0	0
GCR_cBin6804_Ctg1_170	A	74	0.925	0.000796875	0.028229
GCR_cBin6804_Ctg1_170	C	6	0.075	0.000796875	0.028229
ESTNV_27342_254	G	80	1	0	0
ESTV_16240_204	G	80	1	0	0
GCR_cBin29831_Ctg1_68	C	80	1	0	0
ESTNV_32051_1570	G	80	1	0	0
BASS13_B7_B07_761	A	6	0.075	0.000796875	0.028229
BASS13_B7_B07_761	G	74	0.925	0.000796875	0.028229
GCR_cBin28152_Ctg1_60	A	65	0.8125	0.00177734	0.0421586
GCR_cBin28152_Ctg1_60	G	15	0.1875	0.00177734	0.0421586
GCR_cBin28152_Ctg1_185	A	65	0.8125	0.00177734	0.0421586
GCR_cBin28152_Ctg1_185	T	15	0.1875	0.00177734	0.0421586
GCR_cBin14203_Ctg1_147	A	21	0.2625	0.00312109	0.0558667
GCR_cBin14203_Ctg1_147	C	59	0.7375	0.00312109	0.0558667
GCR_cBin15266_Ctg1_58	A	74	0.925	0.000796875	0.028229
GCR_cBin15266_Ctg1_58	G	6	0.075	0.000796875	0.028229
GCR_cBin6804_Ctg1_99	A	74	0.925	0.000796875	0.028229
GCR_cBin6804_Ctg1_99	G	6	0.075	0.000796875	0.028229
GCR_cBin24972_Ctg1_42	A	15	0.1875	0.00177734	0.0421586
GCR_cBin24972_Ctg1_42	G	65	0.8125	0.00177734	0.0421586
GCR_cBin31996_Ctg1_226	A	80	1	0	0
GCR_cBin31996_Ctg1_169	A	13	0.1625	0.00230859	0.0480478
GCR_cBin31996_Ctg1_169	G	67	0.8375	0.00230859	0.0480478
GCR_cBin34406_Ctg1_88	A	24	0.3	0.0024375	0.049371
GCR_cBin34406_Ctg1_88	G	56	0.7	0.0024375	0.049371
GCR_cBin43448_Ctg1_152	A	58	0.725	0.00279687	0.0528855
GCR_cBin43448_Ctg1_152	C	22	0.275	0.00279687	0.0528855
ESTNV_32001_1134	A	78	0.975	0.000296875	0.0172301
ESTNV_32001_1134	G	2	0.025	0.000296875	0.0172301
GCR_hBin13605_Ctg1_93	A	44	0.55	0.0030625	0.0553399
GCR_hBin13605_Ctg1_93	C	36	0.45	0.0030625	0.0553399
GCR_cBin20942_Ctg1_68	A	78	0.975	0.000296875	0.0172301
GCR_cBin20942_Ctg1_68	C	2	0.025	0.000296875	0.0172301
GCR_cBin49210_Ctg1_198	A	68	0.85	0.001625	0.0403113
GCR_cBin49210_Ctg1_198	G	12	0.15	0.001625	0.0403113
GCR_cBin20942_Ctg1_63	A	2	0.025	0.000296875	0.0172301
GCR_cBin20942_Ctg1_63	C	78	0.975	0.000296875	0.0172301
GCR_cBin7112_Ctg1_397	A	25	0.3125	0.00271484	0.0521042
GCR_cBin7112_Ctg1_397	C	55	0.6875	0.00271484	0.0521042
GCR_cBin37669_Ctg1_32	A	1	0.0125	0.000152344	0.0123428
GCR_cBin37669_Ctg1_32	G	79	0.9875	0.000152344	0.0123428
ESTNV_34868_337	C	80	1	0	0
ESTNV_22661_681	G	80	1	0	0
GCR_cBin27851_Ctg1_509	A	3	0.0375	0.000433594	0.0208229
GCR_cBin27851_Ctg1_509	T	77	0.9625	0.000433594	0.0208229
GCR_cBin27851_Ctg1_590	A	3	0.0375	0.000433594	0.0208229
GCR_cBin27851_Ctg1_590	G	77	0.9625	0.000433594	0.0208229
ESTNV_30354_106	A	80	1	0	0
ESTNV_30411_506	A	31	0.3875	0.00265234	0.0515009
ESTNV_30411_506	C	49	0.6125	0.00265234	0.0515009
ESTNV_33967_1368	G	80	1	0	0
GCR_cBin38527_Ctg1_75	C	80	1	0	0
ESTNV_33967_1551	A	80	1	0	0
GCR_cBin3280_Ctg1_169	A	76	0.95	0.0005625	0.0237171
GCR_cBin3280_Ctg1_169	C	4	0.05	0.0005625	0.0237171
ESTV_15445_193	A	8	0.1	0.001	0.0316228
ESTV_15445_193	G	72	0.9	0.001	0.0316228
GCR_cBin3280_Ctg1_135	A	76	0.95	0.0005625	0.0237171
GCR_cBin3280_Ctg1_135	G	4	0.05	0.0005625	0.0237171
ESTV_12252_166	G	80	1	0	0
GCR_cBin37519_Ctg1_244	A	80	1	0	0
ESTNV_35410_1102	C	55	0.6875	0.00271484	0.0521042
ESTNV_35410_1102	G	25	0.3125	0.00271484	0.0521042
ESTNV_37136_732	G	80	1	0	0
GCR_cBin8284_Ctg1_213	C	74	0.925	0.000796875	0.028229
GCR_cBin8284_Ctg1_213	G	6	0.075	0.000796875	0.028229
GCR_cBin5316_Ctg2_193	A	59	0.7375	0.00249609	0.0499609
GCR_cBin5316_Ctg2_193	T	21	0.2625	0.00249609	0.0499609
GCR_cBin45701_Ctg1_227	A	80	1	0	0
ESTNV_31893_467	G	80	1	0	0
ESTNV_31893_226	A	80	1	0	0
GCR_cBin16365_Ctg1_475	A	30	0.375	0.00210938	0.0459279
GCR_cBin16365_Ctg1_475	C	50	0.625	0.00210938	0.0459279
ESTV_21702_136	A	80	1	0	0
ESTV_16902_235	A	78	0.975	0.000296875	0.0172301
ESTV_16902_235	C	2	0.025	0.000296875	0.0172301
ESTNV_36697_1478	A	7	0.0875	0.000902344	0.030039
ESTNV_36697_1478	G	73	0.9125	0.000902344	0.030039
GCR_cBin26271_Ctg1_32	A	50	0.625	0.00304688	0.0551985
GCR_cBin26271_Ctg1_32	G	30	0.375	0.00304688	0.0551985
ESTNV_33477_1310	G	80	1	0	0
GCR_cBin17329_Ctg2_166	A	80	1	0	0
GCR_hBin21648_Ctg1_137	A	80	1	0	0
ESTV_21377_436	A	9	0.1125	0.00108984	0.0330128
ESTV_21377_436	T	71	0.8875	0.00108984	0.0330128
GCR_cBin12401_Ctg1_186	A	39	0.4875	0.00296484	0.0544504
GCR_cBin12401_Ctg1_186	G	41	0.5125	0.00296484	0.0544504
GCR_cBin1955_Ctg1_60	A	80	1	0	0
GCR_cBin30689_Ctg1_25	T	80	1	0	0
ESTNV_36095_1044	C	80	1	0	0
GCR_cBin43112_Ctg1_86	A	9	0.1125	0.00171484	0.0414107
GCR_cBin43112_Ctg1_86	G	71	0.8875	0.00171484	0.0414107
ESTNV_36751_1595	A	23	0.2875	0.00183984	0.0428934
ESTNV_36751_1595	G	57	0.7125	0.00183984	0.0428934
GCR_cBin22374_Ctg1_508	A	61	0.7625	0.00187109	0.0432561
GCR_cBin22374_Ctg1_508	G	19	0.2375	0.00187109	0.0432561
ESTNV_19996_365	A	57	0.7125	0.00183984	0.0428934
ESTNV_19996_365	G	23	0.2875	0.00183984	0.0428934
ESTNV_36998_1021	A	60	0.75	0.0021875	0.0467707
ESTNV_36998_1021	G	20	0.25	0.0021875	0.0467707
ESTNV_36516_128	G	80	1	0	0
GCR_cBin14440_Ctg1_49	A	8	0.1	0.001	0.0316228
GCR_cBin14440_Ctg1_49	G	72	0.9	0.001	0.0316228
GCR_cBin3627_Ctg1_142	C	80	1	0	0
BASS113_B7_G12_644	G	80	1	0	0
ESTNV_32044_621	A	80	1	0	0
GCR_cBin52996_Ctg1_137	G	80	1	0	0
GCR_cBin21125_Ctg1_53	C	80	1	0	0
GCR_cBin13800_Ctg1_159	A	55	0.6875	0.00240234	0.0490137
GCR_cBin13800_Ctg1_159	G	25	0.3125	0.00240234	0.0490137
ESTNV_29541_872	A	9	0.115385	0.00113792	0.033733
ESTNV_29541_872	G	69	0.884615	0.00113792	0.033733
ESTNV_29541_288	A	10	0.125	0.00117187	0.0342327
ESTNV_29541_288	C	70	0.875	0.00117187	0.0342327
GCR_cBin28164_Ctg1_223	A	44	0.55	0.0024375	0.049371
GCR_cBin28164_Ctg1_223	G	36	0.45	0.0024375	0.049371
ESTNV_29967_108	G	80	1	0	0
GCR_cBin8926_Ctg1_226	G	80	1	0	0
ESTNV_33458_777	G	80	1	0	0
ESTNV_27886_813	A	54	0.675	0.00235937	0.0485734
ESTNV_27886_813	G	26	0.325	0.00235937	0.0485734
GCR_hBin27145_Ctg1_110	A	5	0.0625	0.000683594	0.0261456
GCR_hBin27145_Ctg1_110	G	75	0.9375	0.000683594	0.0261456
ESTNV_33232_155	C	80	1	0	0
ESTNV_24376_271	G	80	1	0	0
ESTNV_35394_1479	G	80	1	0	0
GCR_cBin31631_Ctg1_149	C	44	0.55	0.0036875	0.0607248
GCR_cBin31631_Ctg1_149	G	36	0.45	0.0036875	0.0607248
ESTNV_31107_540	A	40	0.5	0.0034375	0.0586302
ESTNV_31107_540	C	40	0.5	0.0034375	0.0586302
GCR_cBin16342_Ctg1_468	A	75	0.9375	0.000683594	0.0261456
GCR_cBin16342_Ctg1_468	G	5	0.0625	0.000683594	0.0261456
ESTV_19947_986	C	67	0.8375	0.00168359	0.0410316
ESTV_19947_986	G	13	0.1625	0.00168359	0.0410316
ESTNV_35822_817	A	45	0.5625	0.00287109	0.0535826
ESTNV_35822_817	G	35	0.4375	0.00287109	0.0535826
GCR_cBin6974_Ctg1_77	A	50	0.625	0.00367187	0.060596
GCR_cBin6974_Ctg1_77	G	30	0.375	0.00367187	0.060596
GCR_cBin27619_Ctg1_193	A	26	0.325	0.00298438	0.0546294
GCR_cBin27619_Ctg1_193	G	54	0.675	0.00298438	0.0546294
GCR_cBin15029_Ctg1_250	C	18	0.225	0.00154688	0.0393303
GCR_cBin15029_Ctg1_250	G	62	0.775	0.00154688	0.0393303
GCR_cBin2599_Ctg1_262	A	24	0.3	0.00275	0.0524404
GCR_cBin2599_Ctg1_262	T	56	0.7	0.00275	0.0524404
ESTNV_24613_246	A	21	0.2625	0.00155859	0.039479
ESTNV_24613_246	C	59	0.7375	0.00155859	0.039479
ESTNV_29500_554	C	80	1	0	0
ESTV_16239_605	C	80	1	0	0
ESTV_16905_208	G	80	1	0	0
GCR_cBin283_Ctg1_120	T	70	1	0	0
ESTNV_34118_596	G	80	1	0	0
ESTNV_16766_113	A	80	1	0	0
ESTNV_34068_665	G	80	1	0	0
ESTNV_34451_135	A	56	0.7	0.002125	0.0460977
ESTNV_34451_135	G	24	0.3	0.002125	0.0460977
ESTNV_28701_207	A	71	0.8875	0.00108984	0.0330128
ESTNV_28701_207	C	9	0.1125	0.00108984	0.0330128
GCR_cBin1755_Ctg1_224	G	80	1	0	0
GCR_hBin32129_Ctg1_119	A	66	0.825	0.00235937	0.0485734
GCR_hBin32129_Ctg1_119	C	14	0.175	0.00235937	0.0485734
GCR_cBin1603_Ctg1_67	G	80	1	0	0
GCR_cBin20843_Ctg1_110	A	29	0.3625	0.00218359	0.0467289
GCR_cBin20843_Ctg1_110	G	51	0.6375	0.00218359	0.0467289
ESTV_21966_300	A	80	1	0	0
ESTNV_29234_195	A	54	0.675	0.00204688	0.0452424
ESTNV_29234_195	C	26	0.325	0.00204688	0.0452424
ESTV_18152_336	A	20	0.25	0.001875	0.0433013
ESTV_18152_336	T	60	0.75	0.001875	0.0433013
ESTNV_29391_150	A	35	0.4375	0.00380859	0.0617138
ESTNV_29391_150	G	45	0.5625	0.00380859	0.0617138
GCR_cBin41648_Ctg1_124	A	80	1	0	0
ESTV_16288_295	C	70	0.875	0.00117187	0.0342327
ESTV_16288_295	G	10	0.125	0.00117187	0.0342327
ESTV_17470_405	A	70	0.875	0.00117187	0.0342327
ESTV_17470_405	G	10	0.125	0.00117187	0.0342327
ESTV_17405_76	C	42	0.538462	0.00275628	0.0525003
ESTV_17405_76	G	36	0.461538	0.00275628	0.0525003
ESTNV_32552_113	A	62	0.775	0.00154688	0.0393303
ESTNV_32552_113	C	18	0.225	0.00154688	0.0393303
ESTNV_34925_2923	A	11	0.1375	0.00155859	0.039479
ESTNV_34925_2923	G	69	0.8625	0.00155859	0.039479
ESTNV_23083_64	A	4	0.0512821	0.00059003	0.0242905
ESTNV_23083_64	G	74	0.948718	0.00059003	0.0242905
GCR_cBin22452_Ctg1_155	A	80	1	0	0
GCR_cBin22452_Ctg1_142	A	80	1	0	0
ESTNV_37675_1953	A	37	0.4625	0.00199609	0.0446777
ESTNV_37675_1953	G	43	0.5375	0.00199609	0.0446777
ESTNV_35592_1024	A	47	0.652778	0.00455997	0.0675276
ESTNV_35592_1024	G	25	0.347222	0.00455997	0.0675276
BASS118_B7_B11_507	G	80	1	0	0
ESTNV_36582_634	G	80	1	0	0
ESTNV_28584_983	A	80	1	0	0
ESTNV_32001_1243	G	80	1	0	0
ESTNV_26671_385	A	80	1	0	0
GCR_cBin1134_Ctg1_360	A	51	0.6375	0.00374609	0.0612053
GCR_cBin1134_Ctg1_360	G	29	0.3625	0.00374609	0.0612053
BASS118_B7_B11_702	G	80	1	0	0
ESTNV_31895_1189	A	68	0.85	0.0013125	0.0362284
ESTNV_31895_1189	C	12	0.15	0.0013125	0.0362284
GCR_cBin50373_Ctg1_78	A	80	1	0	0
ESTNV_27544_95	C	80	1	0	0
ESTNV_31140_226	A	80	1	0	0
ESTNV_31438_51	A	46	0.575	0.00329687	0.0574184
ESTNV_31438_51	G	34	0.425	0.00329687	0.0574184
ESTNV_32228_633	A	2	0.025	0.000296875	0.0172301
ESTNV_32228_633	G	78	0.975	0.000296875	0.0172301
GCR_cBin14555_Ctg1_93	A	80	1	0	0
GCR_cBin42832_Ctg1_109	A	58	1	0	0
GCR_cBin37379_Ctg1_47	A	80	1	0	0
ESTV_18493_1052	A	80	1	0	0
ESTNV_34763_1056	T	80	1	0	0
ESTNV_34763_2153	A	30	0.375	0.00367187	0.060596
ESTNV_34763_2153	C	50	0.625	0.00367187	0.060596
GCR_cBin19457_Ctg1_45	A	80	1	0	0
GCR_cBin528_Ctg1_496	G	74	1	0	0
ESTNV_34964_301	A	78	1	0	0
GCR_rBin1448_Ctg1_97	G	80	1	0	0
GCR_rBin3760_Ctg1_98	G	80	1	0	0
GCR_cBin8933_Ctg1_66	A	31	0.3875	0.00171484	0.0414107
GCR_cBin8933_Ctg1_66	C	49	0.6125	0.00171484	0.0414107
GCR_cBin18827_Ctg1_195	A	78	0.975	0.000296875	0.0172301
GCR_cBin18827_Ctg1_195	C	2	0.025	0.000296875	0.0172301
GCR_cBin46701_Ctg1_110	A	19	0.2375	0.00218359	0.0467289
GCR_cBin46701_Ctg1_110	T	61	0.7625	0.00218359	0.0467289
ESTNV_34158_505	G	80	1	0	0
GCR_cBin15768_Ctg1_57	A	60	0.75	0.0015625	0.0395285
GCR_cBin15768_Ctg1_57	G	20	0.25	0.0015625	0.0395285
GCR_cBin39368_Ctg1_207	C	80	1	0	0
ESTNV_35436_232	T	80	1	0	0
ESTNV_33063_792	A	64	0.8	0.00275	0.0524404
ESTNV_33063_792	G	16	0.2	0.00275	0.0524404
GCR_cBin2200_Ctg1_90	A	80	1	0	0
ESTNV_23390_339	C	80	1	0	0
GCR_cBin5359_Ctg1_235	A	15	0.1875	0.00271484	0.0521042
GCR_cBin5359_Ctg1_235	C	65	0.8125	0.00271484	0.0521042
ESTNV_19861_125	A	80	1	0	0
GCR_hBin33809_Ctg1_106	A	65	0.8125	0.00271484	0.0521042
GCR_hBin33809_Ctg1_106	G	15	0.1875	0.00271484	0.0521042
ESTNV_36266_544	A	29	0.3625	0.00280859	0.0529962
ESTNV_36266_544	C	51	0.6375	0.00280859	0.0529962
GCR_rBin3608_Ctg1_274	G	80	1	0	0
ESTNV_27444_1104	G	80	1	0	0
GCR_cBin50404_Ctg1_127	C	80	1	0	0
ESTNV_33311_572	A	80	1	0	0
GCR_cBin38289_Ctg1_239	A	1	0.0125	0.000152344	0.0123428
GCR_cBin38289_Ctg1_239	G	79	0.9875	0.000152344	0.0123428
GCR_cBin52665_Ctg1_33	A	80	1	0	0
GCR_cBin6541_Ctg1_187	A	32	0.4	0.0025625	0.0506211
GCR_cBin6541_Ctg1_187	G	48	0.6	0.0025625	0.0506211
ESTNV_23136_481	A	53	0.6625	0.00262109	0.0511966
ESTNV_23136_481	C	27	0.3375	0.00262109	0.0511966
ESTNV_29410_233	G	80	1	0	0
ESTNV_37581_1182	A	53	0.6625	0.00262109	0.0511966
ESTNV_37581_1182	G	27	0.3375	0.00262109	0.0511966
ESTV_16551_148	A	80	1	0	0
ESTV_16551_442	A	27	0.3375	0.00262109	0.0511966
ESTV_16551_442	G	53	0.6625	0.00262109	0.0511966
ESTNV_31278_125	A	51	0.6375	0.00280859	0.0529962
ESTNV_31278_125	C	29	0.3625	0.00280859	0.0529962
ESTNV_13016_93	A	37	0.560606	0.00310265	0.0557015
ESTNV_13016_93	G	29	0.439394	0.00310265	0.0557015
GCR_cBin6788_Ctg1_156	G	80	1	0	0
GCR_cBin25229_Ctg2_105	T	80	1	0	0
ESTV_15804_172	G	80	1	0	0
GCR_cBin50289_Ctg1_55	G	80	1	0	0
ESTNV_27780_352	A	80	1	0	0
GCR_cBin735_Ctg2_314	C	78	1	0	0
GCR_cBin5772_Ctg1_288	C	80	1	0	0
GCR_cBin28548_Ctg1_73	G	80	1	0	0
GCR_cBin5772_Ctg1_84	A	80	1	0	0
ESTNV_30491_362	G	80	1	0	0
ESTNV_16613_137	G	80	1	0	0
ESTNV_13258_439	C	80	1	0	0
GCR_cBin44221_Ctg1_78	A	13	0.1625	0.00137109	0.0370283
GCR_cBin44221_Ctg1_78	G	67	0.8375	0.00137109	0.0370283
ESTNV_26616_500	A	80	1	0	0
ESTNV_31519_569	A	80	1	0	0
ESTNV_31661_274	C	80	1	0	0
ESTV_14738_303	G	80	1	0	0
ESTV_13534_158	G	78	1	0	0
GCR_cBin34971_Ctg1_240	C	80	1	0	0
ESTNV_28965_1177	A	79	0.9875	0.000152344	0.0123428
ESTNV_28965_1177	C	1	0.0125	0.000152344	0.0123428
GCR_cBin34971_Ctg1_217	A	80	1	0	0
GCR_cBin16135_Ctg1_203	A	79	0.9875	0.000152344	0.0123428
GCR_cBin16135_Ctg1_203	T	1	0.0125	0.000152344	0.0123428
GCR_cBin12267_Ctg1_160	A	80	1	0	0
GCR_cBin12267_Ctg1_307	A	13	0.1625	0.00168359	0.0410316
GCR_cBin12267_Ctg1_307	C	67	0.8375	0.00168359	0.0410316
GCR_cBin25322_Ctg1_126	A	13	0.1625	0.00168359	0.0410316
GCR_cBin25322_Ctg1_126	G	67	0.8375	0.00168359	0.0410316
ESTNV_32152_893	A	80	1	0	0
GCR_cBin34913_Ctg1_140	A	77	0.9625	0.000433594	0.0208229
GCR_cBin34913_Ctg1_140	T	3	0.0375	0.000433594	0.0208229
GCR_cBin34913_Ctg1_142	A	77	0.9625	0.000433594	0.0208229
GCR_cBin34913_Ctg1_142	G	3	0.0375	0.000433594	0.0208229
GCR_cBin34172_Ctg1_109	A	79	0.9875	0.000152344	0.0123428
GCR_cBin34172_Ctg1_109	C	1	0.0125	0.000152344	0.0123428
GCR_cBin25879_Ctg1_163	C	80	1	0	0
GCR_cBin30260_Ctg1_67	C	80	1	0	0
BASS12_B7_B06_623	A	1	0.0125	0.000152344	0.0123428
BASS12_B7_B06_623	C	79	0.9875	0.000152344	0.0123428
BASS12_B7_B06_1050	A	4	0.05	0.0005625	0.0237171
BASS12_B7_B06_1050	G	76	0.95	0.0005625	0.0237171
ESTNV_31974_783	C	80	1	0	0
ESTNV_32253_402	C	80	1	0	0
ESTNV_33590_151	C	25	0.3125	0.00271484	0.0521042
ESTNV_33590_151	G	55	0.6875	0.00271484	0.0521042
GCR_cBin6568_Ctg1_186	A	28	0.35	0.002875	0.053619
GCR_cBin6568_Ctg1_186	C	52	0.65	0.002875	0.053619
GCR_cBin13876_Ctg1_149	A	2	0.025	0.000296875	0.0172301
GCR_cBin13876_Ctg1_149	G	78	0.975	0.000296875	0.0172301
ESTNV_34575_1979	A	66	0.825	0.00173438	0.0416458
ESTNV_34575_1979	G	14	0.175	0.00173438	0.0416458
ESTNV_35937_1368	A	80	1	0	0
GCR_cBin8095_Ctg1_103	A	80	1	0	0
ESTNV_35094_1383	A	80	1	0	0
GCR_cBin4931_Ctg1_21	A	80	1	0	0
ESTNV_35536_1238	A	56	0.7	0.0015	0.0387298
ESTNV_35536_1238	G	24	0.3	0.0015	0.0387298
ESTNV_26812_369	A	80	1	0	0
GCR_cBin33361_Ctg1_258	G	80	1	0	0
GCR_cBin5954_Ctg2_568	G	80	1	0	0
ESTV_17458_1031	A	74	0.925	0.00110937	0.0333073
ESTV_17458_1031	G	6	0.075	0.00110937	0.0333073
ESTNV_26812_629	C	43	0.5375	0.00262109	0.0511966
ESTNV_26812_629	G	37	0.4625	0.00262109	0.0511966
GCR_cBin8426_Ctg1_154	A	43	0.5375	0.00262109	0.0511966
GCR_cBin8426_Ctg1_154	C	37	0.4625	0.00262109	0.0511966
GCR_cBin8426_Ctg1_200	A	35	0.460526	0.00290221	0.0538722
GCR_cBin8426_Ctg1_200	C	41	0.539474	0.00290221	0.0538722
GCR_cBin22215_Ctg1_184	C	37	0.4625	0.00262109	0.0511966
GCR_cBin22215_Ctg1_184	G	43	0.5375	0.00262109	0.0511966
GCR_cBin25891_Ctg1_305	C	80	1	0	0
GCR_cBin10801_Ctg1_300	A	80	1	0	0
ESTNV_32268_419	A	80	1	0	0
ESTNV_28460_586	A	1	0.0125	0.000152344	0.0123428
ESTNV_28460_586	T	79	0.9875	0.000152344	0.0123428
GCR_cBin7903_Ctg1_574	C	78	1	0	0
ESTNV_37373_1395	A	2	0.025	0.000296875	0.0172301
ESTNV_37373_1395	G	78	0.975	0.000296875	0.0172301
ESTNV_30312_1019	C	68	0.85	0.0013125	0.0362284
ESTNV_30312_1019	G	12	0.15	0.0013125	0.0362284
ESTNV_37123_898	A	63	0.807692	0.00151722	0.0389515
ESTNV_37123_898	G	15	0.192308	0.00151722	0.0389515
ESTNV_19653_283	A	5	0.0625	0.000683594	0.0261456
ESTNV_19653_283	G	75	0.9375	0.000683594	0.0261456
ESTNV_37153_794	A	12	0.15	0.0013125	0.0362284
ESTNV_37153_794	G	68	0.85	0.0013125	0.0362284
ESTNV_19668_192	C	48	0.6	0.0025625	0.0506211
ESTNV_19668_192	G	32	0.4	0.0025625	0.0506211
GCR_cBin41593_Ctg1_194	A	7	0.0897436	0.000944048	0.0307254
GCR_cBin41593_Ctg1_194	C	71	0.910256	0.000944048	0.0307254
GCR_cBin25388_Ctg1_108	A	19	0.2375	0.00187109	0.0432561
GCR_cBin25388_Ctg1_108	C	61	0.7625	0.00187109	0.0432561
GCR_cBin25388_Ctg1_170	A	19	0.2375	0.00187109	0.0432561
GCR_cBin25388_Ctg1_170	T	61	0.7625	0.00187109	0.0432561
ESTNV_33983_368	A	55	0.6875	0.00302734	0.0550213
ESTNV_33983_368	G	25	0.3125	0.00302734	0.0550213
ESTNV_33983_223	G	80	1	0	0
ESTV_15373_465	A	30	0.375	0.00242187	0.0492125
ESTV_15373_465	G	50	0.625	0.00242187	0.0492125
ESTV_20583_309	C	79	0.9875	0.000152344	0.0123428
ESTV_20583_309	G	1	0.0125	0.000152344	0.0123428
ESTNV_37479_1245	A	30	0.375	0.00242187	0.0492125
ESTNV_37479_1245	T	50	0.625	0.00242187	0.0492125
ESTNV_36072_124	G	80	1	0	0
ESTNV_30452_1210	A	14	0.175	0.00142187	0.0377078
ESTNV_30452_1210	C	66	0.825	0.00142187	0.0377078
ESTNV_36704_1199	A	23	0.2875	0.00277734	0.0527005
ESTNV_36704_1199	G	57	0.7125	0.00277734	0.0527005
GCR_cBin15414_Ctg1_275	A	57	0.7125	0.00277734	0.0527005
GCR_cBin15414_Ctg1_275	G	23	0.2875	0.00277734	0.0527005
ESTV_21022_166	A	57	0.7125	0.00277734	0.0527005
ESTV_21022_166	C	23	0.2875	0.00277734	0.0527005
GCR_cBin16057_Ctg1_166	A	80	1	0	0
GCR_cBin16057_Ctg1_199	A	80	1	0	0
GCR_cBin531_Ctg1_115	A	80	1	0	0
GCR_cBin36646_Ctg1_99	A	80	1	0	0
GCR_cBin43234_Ctg1_170	G	80	1	0	0
GCR_cBin36646_Ctg1_106	T	80	1	0	0
GCR_cBin8483_Ctg1_179	A	31	0.3875	0.00265234	0.0515009
GCR_cBin8483_Ctg1_179	G	49	0.6125	0.00265234	0.0515009
GCR_cBin8483_Ctg1_168	A	43	0.5375	0.00387109	0.0622181
GCR_cBin8483_Ctg1_168	C	37	0.4625	0.00387109	0.0622181
GCR_cBin36902_Ctg1_70	A	36	0.45	0.00275	0.0524404
GCR_cBin36902_Ctg1_70	T	44	0.55	0.00275	0.0524404
GCR_cBin22155_Ctg1_66	A	27	0.3375	0.00262109	0.0511966
GCR_cBin22155_Ctg1_66	G	53	0.6625	0.00262109	0.0511966
GCR_cBin22155_Ctg1_21	A	27	0.3375	0.00262109	0.0511966
GCR_cBin22155_Ctg1_21	G	53	0.6625	0.00262109	0.0511966
ESTV_21093_430	G	80	1	0	0
GCR_cBin4378_Ctg1_115	G	80	1	0	0
GCR_cBin15199_Ctg1_186	G	80	1	0	0
ESTNV_32124_500	A	59	0.7375	0.00187109	0.0432561
ESTNV_32124_500	G	21	0.2625	0.00187109	0.0432561
ESTNV_36871_194	C	27	0.3375	0.00199609	0.0446777
ESTNV_36871_194	G	53	0.6625	0.00199609	0.0446777
GCR_cBin17984_Ctg1_90	A	21	0.2625	0.00187109	0.0432561
GCR_cBin17984_Ctg1_90	G	59	0.7375	0.00187109	0.0432561
ESTNV_36871_453	A	78	0.975	0.000296875	0.0172301
ESTNV_36871_453	C	2	0.025	0.000296875	0.0172301
ESTNV_36871_663	A	78	0.975	0.000296875	0.0172301
ESTNV_36871_663	C	2	0.025	0.000296875	0.0172301
ESTV_10747_366	A	37	0.4625	0.00293359	0.0541627
ESTV_10747_366	G	43	0.5375	0.00293359	0.0541627
ESTNV_31289_1032	A	80	1	0	0
ESTNV_35334_747	A	80	1	0	0
ESTNV_35334_1410	A	80	1	0	0
ESTNV_19071_457	A	9	0.1125	0.00108984	0.0330128
ESTNV_19071_457	C	71	0.8875	0.00108984	0.0330128
ESTNV_29283_367	A	9	0.1125	0.00108984	0.0330128
ESTNV_29283_367	G	71	0.8875	0.00108984	0.0330128
GCR_cBin11404_Ctg1_50	C	3	0.0375	0.000433594	0.0208229
GCR_cBin11404_Ctg1_50	G	77	0.9625	0.000433594	0.0208229
ESTNV_22983_475	A	77	0.9625	0.000433594	0.0208229
ESTNV_22983_475	T	3	0.0375	0.000433594	0.0208229
GCR_cBin9116_Ctg1_146	A	80	1	0	0
GCR_cBin9116_Ctg1_67	C	80	1	0	0
GCR_cBin30245_Ctg1_84	A	80	1	0	0
ESTNV_35215_1505	A	80	1	0	0
GCR_cBin780_Ctg1_144	A	80	1	0	0
ESTNV_29224_109	A	80	1	0	0
GCR_cBin17160_Ctg1_108	A	31	0.3875	0.00202734	0.045026
GCR_cBin17160_Ctg1_108	G	49	0.6125	0.00202734	0.045026
GCR_cBin2785_Ctg1_206	C	30	0.384615	0.00212411	0.0460881
GCR_cBin2785_Ctg1_206	G	48	0.615385	0.00212411	0.0460881
GCR_cBin20352_Ctg1_163	A	80	1	0	0
ESTV_16907_342	A	43	0.5375	0.00355859	0.0596539
ESTV_16907_342	G	37	0.4625	0.00355859	0.0596539
GCR_cBin9323_Ctg1_78	A	43	0.5375	0.00355859	0.0596539
GCR_cBin9323_Ctg1_78	C	37	0.4625	0.00355859	0.0596539
GCR_cBin49299_Ctg1_186	G	80	1	0	0
ESTNV_32102_56	A	1	0.0125	0.000152344	0.0123428
ESTNV_32102_56	G	79	0.9875	0.000152344	0.0123428
ESTV_20256_233	A	80	1	0	0
ESTV_20256_375	A	80	1	0	0
ESTNV_36130_3412	C	80	1	0	0
ESTNV_31896_140	A	42	0.538462	0.00242755	0.0492702
ESTNV_31896_140	C	36	0.461538	0.00242755	0.0492702
ESTNV_31896_408	A	37	0.4625	0.00230859	0.0480478
ESTNV_31896_408	G	43	0.5375	0.00230859	0.0480478
GCR_cBin15418_Ctg1_123	G	80	1	0	0
ESTNV_24505_142	C	80	1	0	0
ESTNV_36717_1690	G	80	1	0	0
GCR_cBin38330_Ctg1_135	A	24	0.3	0.002125	0.0460977
GCR_cBin38330_Ctg1_135	C	56	0.7	0.002125	0.0460977
GCR_cBin332_Ctg1_80	C	2	0.025	0.000296875	0.0172301
GCR_cBin332_Ctg1_80	G	78	0.975	0.000296875	0.0172301
ESTNV_35205_1428	A	71	0.8875	0.00140234	0.0374479
ESTNV_35205_1428	C	9	0.1125	0.00140234	0.0374479
ESTNV_25127_174	A	32	0.4	0.0025625	0.0506211
ESTNV_25127_174	T	48	0.6	0.0025625	0.0506211
ESTNV_35387_1829	A	30	0.375	0.00242187	0.0492125
ESTNV_35387_1829	C	50	0.625	0.00242187	0.0492125
GCR_cBin27124_Ctg1_83	A	40	0.5	0.0025	0.05
GCR_cBin27124_Ctg1_83	C	40	0.5	0.0025	0.05
GCR_cBin48578_Ctg1_194	A	15	0.1875	0.00208984	0.0457148
GCR_cBin48578_Ctg1_194	G	65	0.8125	0.00208984	0.0457148
GCR_cBin30256_Ctg1_109	A	65	0.8125	0.00208984	0.0457148
GCR_cBin30256_Ctg1_109	T	15	0.1875	0.00208984	0.0457148
GCR_cBin30256_Ctg1_176	C	65	0.8125	0.00208984	0.0457148
GCR_cBin30256_Ctg1_176	G	15	0.1875	0.00208984	0.0457148
GCR_cBin30256_Ctg1_74	A	15	0.1875	0.00208984	0.0457148
GCR_cBin30256_Ctg1_74	G	65	0.8125	0.00208984	0.0457148
GCR_cBin1614_Ctg1_629	G	80	1	0	0
GCR_cBin2536_Ctg1_238	G	80	1	0	0
GCR_cBin1614_Ctg1_237	A	80	1	0	0
GCR_cBin30250_Ctg1_267	A	80	1	0	0
GCR_cBin4787_Ctg1_387	G	80	1	0	0
GCR_cBin33124_Ctg1_35	A	2	0.025	0.000296875	0.0172301
GCR_cBin33124_Ctg1_35	G	78	0.975	0.000296875	0.0172301
ESTNV_35077_1676	A	2	0.025	0.000296875	0.0172301
ESTNV_35077_1676	G	78	0.975	0.000296875	0.0172301
GCR_cBin8585_Ctg1_77	G	80	1	0	0
ESTNV_30121_652	A	53	0.6625	0.00324609	0.0569745
ESTNV_30121_652	G	27	0.3375	0.00324609	0.0569745
ESTV_21970_586	A	10	0.125	0.00117187	0.0342327
ESTV_21970_586	C	70	0.875	0.00117187	0.0342327
GCR_cBin42759_Ctg1_238	A	35	0.4375	0.00224609	0.047393
GCR_cBin42759_Ctg1_238	G	45	0.5625	0.00224609	0.047393
GCR_cBin30179_Ctg1_191	A	11	0.1375	0.00124609	0.0353001
GCR_cBin30179_Ctg1_191	T	69	0.8625	0.00124609	0.0353001
ESTV_12578_95	C	80	1	0	0
GCR_cBin8424_Ctg1_31	A	76	0.95	0.0005625	0.0237171
GCR_cBin8424_Ctg1_31	C	4	0.05	0.0005625	0.0237171
ESTNV_26787_1038	A	79	0.9875	0.000152344	0.0123428
ESTNV_26787_1038	C	1	0.0125	0.000152344	0.0123428
GCR_cBin3322_Ctg1_167	A	79	0.9875	0.000152344	0.0123428
GCR_cBin3322_Ctg1_167	G	1	0.0125	0.000152344	0.0123428
GCR_cBin3071_Ctg1_51	G	80	1	0	0
ESTNV_25443_600	A	80	1	0	0
GCR_cBin13688_Ctg1_129	A	80	1	0	0
GCR_cBin39943_Ctg1_265	G	80	1	0	0
GCR_cBin23202_Ctg1_93	A	80	1	0	0
ESTNV_31093_1513	A	80	1	0	0
ESTV_13699_319	G	80	1	0	0
ESTNV_28113_144	A	79	0.9875	0.000152344	0.0123428
ESTNV_28113_144	C	1	0.0125	0.000152344	0.0123428
ESTNV_28113_319	A	79	0.9875	0.000152344	0.0123428
ESTNV_28113_319	C	1	0.0125	0.000152344	0.0123428
BASS124_B7_D10_265	A	36	0.45	0.0024375	0.049371
BASS124_B7_D10_265	G	44	0.55	0.0024375	0.049371
BASS124_B7_D10_722	A	80	1	0	0
GCR_cBin6609_Ctg1_85	A	1	0.0125	0.000152344	0.0123428
GCR_cBin6609_Ctg1_85	C	79	0.9875	0.000152344	0.0123428
GCR_cBin6609_Ctg1_88	A	79	0.9875	0.000152344	0.0123428
GCR_cBin6609_Ctg1_88	G	1	0.0125	0.000152344	0.0123428
ESTNV_36462_1509	A	1	0.0125	0.000152344	0.0123428
ESTNV_36462_1509	G	79	0.9875	0.000152344	0.0123428
GCR_cBin6609_Ctg1_71	A	1	0.0125	0.000152344	0.0123428
GCR_cBin6609_Ctg1_71	G	79	0.9875	0.000152344	0.0123428
ESTV_15119_356	A	80	1	0	0
ESTV_15119_669	A	43	0.5375	0.00230859	0.0480478
ESTV_15119_669	G	37	0.4625	0.00230859	0.0480478
ESTV_17201_545	A	80	1	0	0
GCR_cBin612_Ctg1_226	A	80	1	0	0
GCR_cBin612_Ctg1_112	A	80	1	0	0
ESTV_17314_458	A	38	0.475	0.00217188	0.0466034
ESTV_17314_458	G	42	0.525	0.00217188	0.0466034
ESTNV_33518_1279	A	39	0.4875	0.00233984	0.0483719
ESTNV_33518_1279	G	41	0.5125	0.00233984	0.0483719
ESTV_14711_157	C	39	0.4875	0.00233984	0.0483719
ESTV_14711_157	G	41	0.5125	0.00233984	0.0483719
ESTNV_33256_490	A	43	0.5375	0.00230859	0.0480478
ESTNV_33256_490	C	37	0.4625	0.00230859	0.0480478
ESTNV_35896_536	C	80	1	0	0
ESTNV_23557_1342	A	80	1	0	0
ESTNV_34257_418	A	80	1	0	0
ESTNV_30607_306	A	80	1	0	0
ESTV_16586_812	A	57	0.7125	0.00277734	0.0527005
ESTV_16586_812	C	23	0.2875	0.00277734	0.0527005
GCR_cBin959_Ctg1_31	C	80	1	0	0
GCR_cBin47_Ctg1_552	G	80	1	0	0
ESTNV_30699_568	C	80	1	0	0
GCR_cBin10694_Ctg1_368	G	80	1	0	0
ESTNV_35766_1019	A	71	0.8875	0.00140234	0.0374479
ESTNV_35766_1019	T	9	0.1125	0.00140234	0.0374479
ESTNV_35766_1178	G	80	1	0	0
ESTNV_16380_81	A	80	1	0	0
ESTNV_35628_2851	A	80	1	0	0
GCR_cBin2723_Ctg1_244	A	78	0.975	0.000296875	0.0172301
GCR_cBin2723_Ctg1_244	G	2	0.025	0.000296875	0.0172301
ESTNV_31916_578	A	52	0.65	0.0035	0.0591608
ESTNV_31916_578	C	28	0.35	0.0035	0.0591608
ESTNV_35628_2366	A	80	1	0	0
GCR_cBin41959_Ctg1_48	A	80	1	0	0
GCR_cBin31945_Ctg1_172	G	80	1	0	0
GCR_cBin38135_Ctg1_130	T	80	1	0	0
ESTV_18633_368	A	51	0.6375	0.00374609	0.0612053
ESTV_18633_368	G	29	0.3625	0.00374609	0.0612053
ESTNV_33335_64	A	75	0.9375	0.000683594	0.0261456
ESTNV_33335_64	G	5	0.0625	0.000683594	0.0261456
GCR_rBin17113_Ctg1_146	A	80	1	0	0
GCR_cBin38782_Ctg1_147	A	80	1	0	0
ESTNV_36893_386	A	75	0.9375	0.000683594	0.0261456
ESTNV_36893_386	G	5	0.0625	0.000683594	0.0261456
ESTNV_34577_143	A	1	0.0125	0.000152344	0.0123428
ESTNV_34577_143	C	79	0.9875	0.000152344	0.0123428
ESTNV_33032_67	G	80	1	0	0
ESTNV_26918_325	A	14	0.175	0.00142187	0.0377078
ESTNV_26918_325	C	66	0.825	0.00142187	0.0377078
ESTNV_35466_1485	A	6	0.075	0.000796875	0.028229
ESTNV_35466_1485	G	74	0.925	0.000796875	0.028229
ESTNV_34644_2797	C	80	1	0	0
ESTNV_36457_2447	A	21	0.2625	0.00312109	0.0558667
ESTNV_36457_2447	G	59	0.7375	0.00312109	0.0558667
ESTNV_29707_992	G	80	1	0	0
ESTV_15722_638	A	15	0.1875	0.00177734	0.0421586
ESTV_15722_638	G	65	0.8125	0.00177734	0.0421586
ESTNV_33266_651	A	58	0.725	0.00217188	0.0466034
ESTNV_33266_651	C	22	0.275	0.00217188	0.0466034
ESTNV_33608_1627	C	24	0.3	0.0018125	0.0425735
ESTNV_33608_1627	G	56	0.7	0.0018125	0.0425735
ESTNV_13978_305	A	77	0.9625	0.000433594	0.0208229
ESTNV_13978_305	G	3	0.0375	0.000433594	0.0208229
ESTV_17836_900	A	28	0.35	0.0019375	0.044017
ESTV_17836_900	G	52	0.65	0.0019375	0.044017
ESTNV_35151_385	C	80	1	0	0
ESTNV_32218_633	A	80	1	0	0
ESTV_20996_116	A	80	1	0	0
GCR_cBin745_Ctg2_456	A	10	0.125	0.00148438	0.0385276
GCR_cBin745_Ctg2_456	G	70	0.875	0.00148438	0.0385276
GCR_cBin745_Ctg2_344	A	70	0.875	0.00148438	0.0385276
GCR_cBin745_Ctg2_344	C	10	0.125	0.00148438	0.0385276
GCR_cBin21647_Ctg1_220	A	2	0.025	0.000296875	0.0172301
GCR_cBin21647_Ctg1_220	T	78	0.975	0.000296875	0.0172301
GCR_cBin33130_Ctg1_122	G	80	1	0	0
GCR_cBin47864_Ctg1_28	A	2	0.025	0.000296875	0.0172301
GCR_cBin47864_Ctg1_28	C	78	0.975	0.000296875	0.0172301
GCR_cBin6555_Ctg1_102	C	80	1	0	0
GCR_cBin6555_Ctg1_258	A	44	0.564103	0.00334631	0.0578473
GCR_cBin6555_Ctg1_258	C	34	0.435897	0.00334631	0.0578473
GCR_cBin48426_Ctg1_136	A	40	0.5	0.00375	0.0612372
GCR_cBin48426_Ctg1_136	C	40	0.5	0.00375	0.0612372
GCR_cBin30011_Ctg1_172	C	80	1	0	0
ESTNV_30477_550	A	40	0.5	0.0040625	0.0637377
ESTNV_30477_550	G	40	0.5	0.0040625	0.0637377
GCR_cBin5951_Ctg1_108	A	1	0.0125	0.000152344	0.0123428
GCR_cBin5951_Ctg1_108	C	79	0.9875	0.000152344	0.0123428
GCR_cBin34041_Ctg1_311	G	80	1	0	0
GCR_cBin6674_Ctg1_36	A	1	0.0125	0.000152344	0.0123428
GCR_cBin6674_Ctg1_36	C	79	0.9875	0.000152344	0.0123428
GCR_cBin23470_Ctg1_62	A	6	0.0769231	0.000834471	0.0288872
GCR_cBin23470_Ctg1_62	G	72	0.923077	0.000834471	0.0288872
ESTNV_33867_553	C	78	0.975	0.000296875	0.0172301
ESTNV_33867_553	G	2	0.025	0.000296875	0.0172301
GCR_cBin19578_Ctg1_70	A	10	0.128205	0.00122221	0.0349601
GCR_cBin19578_Ctg1_70	G	68	0.871795	0.00122221	0.0349601
ESTNV_23914_404	A	8	0.102564	0.0010452	0.0323295
ESTNV_23914_404	G	70	0.897436	0.0010452	0.0323295
GCR_cBin42906_Ctg1_128	A	2	0.025	0.000296875	0.0172301
GCR_cBin42906_Ctg1_128	G	78	0.975	0.000296875	0.0172301
ESTV_14035_356	A	71	0.8875	0.00108984	0.0330128
ESTV_14035_356	C	9	0.1125	0.00108984	0.0330128
ESTNV_28531_364	G	80	1	0	0
GCR_cBin14760_Ctg1_76	A	36	0.45	0.002125	0.0460977
GCR_cBin14760_Ctg1_76	C	44	0.55	0.002125	0.0460977
ESTNV_35783_626	G	80	1	0	0
ESTNV_35783_1291	A	80	1	0	0
GCR_cBin32172_Ctg1_145	A	80	1	0	0
GCR_cBin32172_Ctg1_47	G	80	1	0	0
GCR_hBin20109_Ctg1_164	A	80	1	0	0
GCR_cBin4288_Ctg1_82	G	80	1	0	0
GCR_cBin4288_Ctg1_252	A	80	1	0	0
GCR_rBin15703_Ctg1_214	G	80	1	0	0
GCR_cBin1659_Ctg1_213	A	13	0.216667	0.00482407	0.0694556
GCR_cBin1659_Ctg1_213	G	47	0.783333	0.00482407	0.0694556
GCR_cBin26421_Ctg1_81	G	80	1	0	0
ESTV_20470_501	C	78	0.975	0.000296875	0.0172301
ESTV_20470_501	G	2	0.025	0.000296875	0.0172301
GCR_cBin23258_Ctg1_190	A	1	0.0125	0.000152344	0.0123428
GCR_cBin23258_Ctg1_190	C	79	0.9875	0.000152344	0.0123428
GCR_cBin19351_Ctg1_165	A	28	0.35	0.0031875	0.0564579
GCR_cBin19351_Ctg1_165	C	52	0.65	0.0031875	0.0564579
GCR_cBin42451_Ctg1_191	A	76	0.95	0.0005625	0.0237171
GCR_cBin42451_Ctg1_191	C	4	0.05	0.0005625	0.0237171
BASS110_B6A_E06_264	A	80	1	0	0
GCR_cBin10510_Ctg1_197	A	45	0.5625	0.00162109	0.0402628
GCR_cBin10510_Ctg1_197	G	35	0.4375	0.00162109	0.0402628
ESTNV_12902_251	A	64	0.8	0.002125	0.0460977
ESTNV_12902_251	G	16	0.2	0.002125	0.0460977
ESTNV_36163_936	A	34	0.425	0.00267188	0.0516902
ESTNV_36163_936	G	46	0.575	0.00267188	0.0516902
ESTNV_23562_420	A	3	0.0375	0.000433594	0.0208229
ESTNV_23562_420	G	77	0.9625	0.000433594	0.0208229
GCR_cBin21084_Ctg1_69	A	23	0.2875	0.00308984	0.0555864
GCR_cBin21084_Ctg1_69	G	57	0.7125	0.00308984	0.0555864
GCR_cBin27595_Ctg1_103	A	80	1	0	0
GCR_cBin2432_Ctg1_559	A	1	0.0125	0.000152344	0.0123428
GCR_cBin2432_Ctg1_559	G	79	0.9875	0.000152344	0.0123428
GCR_hBin1530_Ctg1_68	A	59	0.7375	0.00218359	0.0467289
GCR_hBin1530_Ctg1_68	T	21	0.2625	0.00218359	0.0467289
ESTV_17164_89	G	80	1	0	0
ESTNV_32560_1127	G	80	1	0	0
ESTNV_29923_186	G	80	1	0	0
GCR_cBin6775_Ctg1_75	A	80	1	0	0
GCR_cBin26628_Ctg1_243	A	11	0.1375	0.00124609	0.0353001
GCR_cBin26628_Ctg1_243	C	69	0.8625	0.00124609	0.0353001
GCR_cBin1711_Ctg1_654	A	11	0.1375	0.00124609	0.0353001
GCR_cBin1711_Ctg1_654	G	69	0.8625	0.00124609	0.0353001
GCR_cBin19737_Ctg1_226	A	11	0.1375	0.00124609	0.0353001
GCR_cBin19737_Ctg1_226	G	69	0.8625	0.00124609	0.0353001
GCR_cBin19737_Ctg1_139	A	11	0.1375	0.00124609	0.0353001
GCR_cBin19737_Ctg1_139	C	69	0.8625	0.00124609	0.0353001
GCR_cBin21489_Ctg1_370	A	61	0.7625	0.00218359	0.0467289
GCR_cBin21489_Ctg1_370	G	19	0.2375	0.00218359	0.0467289
GCR_cBin3741_Ctg1_126	C	59	0.75641	0.00225897	0.0475287
GCR_cBin3741_Ctg1_126	G	19	0.24359	0.00225897	0.0475287
ESTNV_25641_253	A	78	0.975	0.000296875	0.0172301
ESTNV_25641_253	C	2	0.025	0.000296875	0.0172301
ESTV_21342_355	A	57	0.7125	0.00340234	0.0583296
ESTV_21342_355	G	23	0.2875	0.00340234	0.0583296
GCR_cBin37684_Ctg1_55	A	7	0.0875	0.000902344	0.030039
GCR_cBin37684_Ctg1_55	G	73	0.9125	0.000902344	0.030039
GCR_cBin31693_Ctg1_74	A	7	0.0875	0.000902344	0.030039
GCR_cBin31693_Ctg1_74	C	73	0.9125	0.000902344	0.030039
GCR_cBin31693_Ctg1_166	A	7	0.0875	0.000902344	0.030039
GCR_cBin31693_Ctg1_166	G	73	0.9125	0.000902344	0.030039
GCR_cBin37684_Ctg1_202	A	7	0.0875	0.000902344	0.030039
GCR_cBin37684_Ctg1_202	G	73	0.9125	0.000902344	0.030039
GCR_cBin25358_Ctg1_191	A	26	0.325	0.00298438	0.0546294
GCR_cBin25358_Ctg1_191	G	54	0.675	0.00298438	0.0546294
GCR_cBin28563_Ctg1_122	A	80	1	0	0
GCR_cBin49901_Ctg1_37	A	22	0.275	0.00217188	0.0466034
GCR_cBin49901_Ctg1_37	G	58	0.725	0.00217188	0.0466034
ESTNV_18093_348	C	80	1	0	0
GCR_cBin46142_Ctg1_191	A	62	0.775	0.00185937	0.0431205
GCR_cBin46142_Ctg1_191	G	18	0.225	0.00185937	0.0431205
ESTNV_32502_411	G	80	1	0	0
ESTNV_28577_526	A	80	1	0	0
ESTV_16640_186	C	77	0.987179	0.000160151	0.0126551
ESTV_16640_186	G	1	0.0128205	0.000160151	0.0126551
BASS138_B7_G02_640	G	80	1	0	0
GCR_hBin50784_Ctg1_70	A	29	0.3625	0.00312109	0.0558667
GCR_hBin50784_Ctg1_70	T	51	0.6375	0.00312109	0.0558667
GCR_cBin5629_Ctg1_134	A	63	0.7875	0.00183984	0.0428934
GCR_cBin5629_Ctg1_134	C	17	0.2125	0.00183984	0.0428934
ESTNV_36561_1246	A	1	0.0125	0.000152344	0.0123428
ESTNV_36561_1246	G	79	0.9875	0.000152344	0.0123428
ESTNV_27729_435	A	25	0.3125	0.00208984	0.0457148
ESTNV_27729_435	C	55	0.6875	0.00208984	0.0457148
ESTV_15528_560	A	20	0.25	0.0025	0.05
ESTV_15528_560	C	60	0.75	0.0025	0.05
ESTNV_16145_162	A	63	0.7875	0.00277734	0.0527005
ESTNV_16145_162	T	17	0.2125	0.00277734	0.0527005
ESTNV_33367_515	A	63	0.7875	0.00277734	0.0527005
ESTNV_33367_515	C	17	0.2125	0.00277734	0.0527005
GCR_cBin46269_Ctg1_130	C	20	0.25	0.0025	0.05
GCR_cBin46269_Ctg1_130	G	60	0.75	0.0025	0.05
ESTNV_35689_1120	C	26	0.325	0.00235937	0.0485734
ESTNV_35689_1120	G	54	0.675	0.00235937	0.0485734
ESTNV_33988_1757	A	80	1	0	0
ESTNV_33988_762	A	2	0.025	0.000296875	0.0172301
ESTNV_33988_762	G	78	0.975	0.000296875	0.0172301
GCR_hBin32294_Ctg1_368	A	60	0.75	0.0021875	0.0467707
GCR_hBin32294_Ctg1_368	C	20	0.25	0.0021875	0.0467707
GCR_cBin3506_Ctg1_309	A	1	0.0125	0.000152344	0.0123428
GCR_cBin3506_Ctg1_309	G	79	0.9875	0.000152344	0.0123428
GCR_cBin21806_Ctg1_79	A	32	0.4	0.0025625	0.0506211
GCR_cBin21806_Ctg1_79	T	48	0.6	0.0025625	0.0506211
GCR_cBin32360_Ctg1_288	A	48	0.6	0.0025625	0.0506211
GCR_cBin32360_Ctg1_288	G	32	0.4	0.0025625	0.0506211
GCR_cBin3506_Ctg1_149	A	3	0.0375	0.000433594	0.0208229
GCR_cBin3506_Ctg1_149	C	77	0.9625	0.000433594	0.0208229
GCR_cBin15410_Ctg1_212	A	33	0.4125	0.00246484	0.0496472
GCR_cBin15410_Ctg1_212	C	47	0.5875	0.00246484	0.0496472
ESTNV_30819_535	A	25	0.431034	0.0039977	0.0632274
ESTNV_30819_535	C	33	0.568966	0.0039977	0.0632274
GCR_cBin13823_Ctg2_368	G	80	1	0	0
ESTV_16643_373	A	21	0.2625	0.00249609	0.0499609
ESTV_16643_373	G	59	0.7375	0.00249609	0.0499609
ESTV_16643_586	G	80	1	0	0
ESTV_20925_1105	A	30	0.375	0.00273437	0.0522913
ESTV_20925_1105	C	50	0.625	0.00273437	0.0522913
ESTNV_36918_790	A	80	1	0	0
ESTNV_32393_853	A	41	0.5125	0.00421484	0.0649218
ESTNV_32393_853	G	39	0.4875	0.00421484	0.0649218
GCR_cBin4742_Ctg1_269	A	71	0.8875	0.00108984	0.0330128
GCR_cBin4742_Ctg1_269	C	9	0.1125	0.00108984	0.0330128
ESTNV_17126_935	A	79	0.9875	0.000152344	0.0123428
ESTNV_17126_935	C	1	0.0125	0.000152344	0.0123428
BASS139_B7_E01_105	A	80	1	0	0
ESTNV_33917_998	A	50	0.625	0.00242187	0.0492125
ESTNV_33917_998	G	30	0.375	0.00242187	0.0492125
ESTNV_33917_1292	A	43	0.5375	0.00293359	0.0541627
ESTNV_33917_1292	G	37	0.4625	0.00293359	0.0541627
GCR_cBin15022_Ctg1_318	A	33	0.4125	0.00308984	0.0555864
GCR_cBin15022_Ctg1_318	C	47	0.5875	0.00308984	0.0555864
BASS140_B7_E09_126	A	65	0.8125	0.00177734	0.0421586
BASS140_B7_E09_126	C	15	0.1875	0.00177734	0.0421586
GCR_cBin27107_Ctg1_427	A	80	1	0	0
BASS140_B7_E09_544	A	15	0.1875	0.00177734	0.0421586
BASS140_B7_E09_544	G	65	0.8125	0.00177734	0.0421586
GCR_cBin4279_Ctg1_224	A	40	0.5	0.0034375	0.0586302
GCR_cBin4279_Ctg1_224	T	40	0.5	0.0034375	0.0586302
GCR_cBin28906_Ctg1_149	A	80	1	0	0
GCR_cBin42059_Ctg1_20	A	32	0.4	0.002875	0.053619
GCR_cBin42059_Ctg1_20	G	48	0.6	0.002875	0.053619
ESTV_16809_973	A	66	0.825	0.00204688	0.0452424
ESTV_16809_973	G	14	0.175	0.00204688	0.0452424
ESTNV_37616_3894	A	3	0.0375	0.000433594	0.0208229
ESTNV_37616_3894	C	77	0.9625	0.000433594	0.0208229
GCR_cBin9806_Ctg1_249	C	23	0.2875	0.00215234	0.0463934
GCR_cBin9806_Ctg1_249	G	57	0.7125	0.00215234	0.0463934
ESTV_13644_410	G	80	1	0	0
GCR_cBin9103_Ctg1_35	A	54	0.675	0.00298438	0.0546294
GCR_cBin9103_Ctg1_35	G	26	0.325	0.00298438	0.0546294
GCR_cBin1541_Ctg1_424	G	80	1	0	0
ESTNV_13516_123	A	80	1	0	0
ESTNV_35567_72	A	80	1	0	0
ESTNV_28966_1171	A	80	1	0	0
ESTNV_14764_458	A	80	1	0	0
ESTNV_32717_1091	A	28	0.35	0.0025625	0.0506211
ESTNV_32717_1091	C	52	0.65	0.0025625	0.0506211
GCR_cBin51398_Ctg1_70	A	75	0.9375	0.000683594	0.0261456
GCR_cBin51398_Ctg1_70	C	5	0.0625	0.000683594	0.0261456
ESTNV_25398_289	A	80	1	0	0
GCR_cBin36279_Ctg1_64	A	80	1	0	0
ESTNV_29240_385	A	75	0.9375	0.000683594	0.0261456
ESTNV_29240_385	C	5	0.0625	0.000683594	0.0261456
GCR_cBin6162_Ctg1_59	A	12	0.15	0.0013125	0.0362284
GCR_cBin6162_Ctg1_59	C	68	0.85	0.0013125	0.0362284
GCR_cBin16401_Ctg1_326	A	80	1	0	0
ESTNV_34931_121	A	80	1	0	0
GCR_cBin31415_Ctg1_119	A	80	1	0	0
GCR_cBin17319_Ctg1_126	A	33	0.4125	0.00277734	0.0527005
GCR_cBin17319_Ctg1_126	C	47	0.5875	0.00277734	0.0527005
GCR_cBin9564_Ctg1_161	A	38	0.475	0.00279687	0.0528855
GCR_cBin9564_Ctg1_161	G	42	0.525	0.00279687	0.0528855
GCR_cBin9732_Ctg1_64	C	7	0.0875	0.000902344	0.030039
GCR_cBin9732_Ctg1_64	G	73	0.9125	0.000902344	0.030039
GCR_cBin35021_Ctg1_70	A	80	1	0	0
GCR_cBin19394_Ctg1_156	G	80	1	0	0
GCR_cBin46118_Ctg1_223	A	80	1	0	0
GCR_cBin41876_Ctg1_108	G	80	1	0	0
GCR_cBin29958_Ctg1_84	A	1	0.0125	0.000152344	0.0123428
GCR_cBin29958_Ctg1_84	G	79	0.9875	0.000152344	0.0123428
ESTV_17539_1123	C	80	1	0	0
GCR_cBin12278_Ctg1_153	A	80	1	0	0
ESTNV_33422_864	A	58	0.725	0.00310938	0.0557618
ESTNV_33422_864	T	22	0.275	0.00310938	0.0557618
GCR_cBin15028_Ctg1_199	A	4	0.05	0.0005625	0.0237171
GCR_cBin15028_Ctg1_199	C	76	0.95	0.0005625	0.0237171
ESTV_15187_371	A	4	0.05	0.000875	0.0295804
ESTV_15187_371	G	76	0.95	0.000875	0.0295804
ESTNV_28503_575	A	80	1	0	0
ESTNV_28503_327	A	80	1	0	0
GCR_cBin9428_Ctg1_32	C	80	1	0	0
ESTNV_36230_1120	G	80	1	0	0
ESTV_17202_480	C	80	1	0	0
ESTNV_30258_90	A	80	1	0	0
GCR_cBin37930_Ctg1_88	A	80	1	0	0
GCR_cBin7082_Ctg1_204	A	4	0.05	0.000875	0.0295804
GCR_cBin7082_Ctg1_204	G	76	0.95	0.000875	0.0295804
ESTNV_34419_496	C	80	1	0	0
ESTNV_34833_1382	A	25	0.3125	0.00208984	0.0457148
ESTNV_34833_1382	C	55	0.6875	0.00208984	0.0457148
ESTNV_35650_2037	C	80	1	0	0
GCR_cBin19287_Ctg1_252	A	9	0.1125	0.00108984	0.0330128
GCR_cBin19287_Ctg1_252	G	71	0.8875	0.00108984	0.0330128
ESTNV_35635_2078	A	72	0.9	0.001	0.0316228
ESTNV_35635_2078	C	8	0.1	0.001	0.0316228
GCR_hBin6632_Ctg1_121	A	3	0.0375	0.000433594	0.0208229
GCR_hBin6632_Ctg1_121	C	77	0.9625	0.000433594	0.0208229
BASS112_B7_A12_127	A	80	1	0	0
BASS112_B7_A12_395	G	80	1	0	0
ESTNV_36511_141	A	15	0.1875	0.00146484	0.0382733
ESTNV_36511_141	G	65	0.8125	0.00146484	0.0382733
ESTV_13197_590	A	74	0.925	0.000796875	0.028229
ESTV_13197_590	C	6	0.075	0.000796875	0.028229
GCR_cBin4805_Ctg1_193	A	60	0.75	0.0021875	0.0467707
GCR_cBin4805_Ctg1_193	G	20	0.25	0.0021875	0.0467707
ESTNV_35329_908	C	17	0.2125	0.00183984	0.0428934
ESTNV_35329_908	G	63	0.7875	0.00183984	0.0428934
ESTNV_35352_241	A	17	0.2125	0.00183984	0.0428934
ESTNV_35352_241	G	63	0.7875	0.00183984	0.0428934
ESTNV_35352_77	A	63	0.7875	0.00183984	0.0428934
ESTNV_35352_77	C	17	0.2125	0.00183984	0.0428934
ESTNV_35329_232	A	40	0.5	0.0003125	0.0176777
ESTNV_35329_232	G	40	0.5	0.0003125	0.0176777
GCR_cBin2433_Ctg1_97	A	54	0.675	0.00235937	0.0485734
GCR_cBin2433_Ctg1_97	G	26	0.325	0.00235937	0.0485734
ESTV_16979_565	A	80	1	0	0
ESTNV_33016_564	G	80	1	0	0
GCR_cBin568_Ctg1_74	A	55	0.6875	0.00208984	0.0457148
GCR_cBin568_Ctg1_74	C	25	0.3125	0.00208984	0.0457148
GCR_cBin3044_Ctg1_47	C	45	0.5625	0.00318359	0.0564233
GCR_cBin3044_Ctg1_47	G	35	0.4375	0.00318359	0.0564233
GCR_hBin45092_Ctg1_140	A	63	0.7875	0.00183984	0.0428934
GCR_hBin45092_Ctg1_140	T	17	0.2125	0.00183984	0.0428934
GCR_hBin45092_Ctg1_57	A	29	0.3625	0.00280859	0.0529962
GCR_hBin45092_Ctg1_57	G	51	0.6375	0.00280859	0.0529962
GCR_cBin16144_Ctg1_285	A	16	0.2	0.0015	0.0387298
GCR_cBin16144_Ctg1_285	G	64	0.8	0.0015	0.0387298
GCR_cBin17565_Ctg1_349	G	80	1	0	0
GCR_cBin17565_Ctg1_401	G	80	1	0	0
GCR_cBin1635_Ctg1_70	A	20	0.25	0.0028125	0.053033
GCR_cBin1635_Ctg1_70	T	60	0.75	0.0028125	0.053033
ESTNV_34623_1031	G	80	1	0	0
GCR_cBin9253_Ctg1_169	A	63	0.875	0.00168789	0.0410839
GCR_cBin9253_Ctg1_169	C	9	0.125	0.00168789	0.0410839
ESTNV_35547_1444	A	11	0.1375	0.00124609	0.0353001
ESTNV_35547_1444	G	69	0.8625	0.00124609	0.0353001
ESTNV_30983_1638	G	80	1	0	0
ESTNV_28895_687	C	80	1	0	0
ESTNV_36086_719	G	80	1	0	0
ESTNV_35503_345	A	80	1	0	0
ESTNV_35503_827	G	80	1	0	0
ESTNV_32703_428	A	80	1	0	0
ESTNV_32703_647	A	80	1	0	0
ESTNV_28129_298	A	29	0.3625	0.00249609	0.0499609
ESTNV_28129_298	G	51	0.6375	0.00249609	0.0499609
ESTNV_37656_1100	A	80	1	0	0
ESTV_21187_191	A	55	0.6875	0.00271484	0.0521042
ESTV_21187_191	G	25	0.3125	0.00271484	0.0521042
ESTV_21697_1223	A	16	0.2	0.0015	0.0387298
ESTV_21697_1223	G	64	0.8	0.0015	0.0387298
ESTV_21801_199	A	80	1	0	0
ESTNV_22829_341	A	68	0.85	0.001625	0.0403113
ESTNV_22829_341	C	12	0.15	0.001625	0.0403113
GCR_cBin8515_Ctg1_191	A	12	0.15	0.0013125	0.0362284
GCR_cBin8515_Ctg1_191	C	68	0.85	0.0013125	0.0362284
GCR_cBin40624_Ctg1_148	A	76	0.95	0.0005625	0.0237171
GCR_cBin40624_Ctg1_148	G	4	0.05	0.0005625	0.0237171
GCR_cBin33417_Ctg1_101	A	20	0.25	0.0021875	0.0467707
GCR_cBin33417_Ctg1_101	G	60	0.75	0.0021875	0.0467707
ESTV_11377_108	A	80	1	0	0
ESTNV_21396_116	G	80	1	0	0
GCR_cBin41869_Ctg1_110	A	80	1	0	0
ESTNV_31747_532	G	80	1	0	0
ESTV_16743_404	A	80	1	0	0
ESTV_20625_51	A	80	1	0	0
ESTNV_20180_573	A	80	1	0	0
ESTNV_34353_55	A	80	1	0	0
GCR_cBin6795_Ctg1_308	G	80	1	0	0
ESTV_21892_327	C	80	1	0	0
GCR_cBin17748_Ctg1_51	C	80	1	0	0
ESTNV_35314_130	C	80	1	0	0
ESTNV_34464_1404	G	80	1	0	0
GCR_cBin4170_Ctg1_233	C	78	1	0	0
GCR_cBin4170_Ctg1_228	A	80	1	0	0
GCR_cBin5339_Ctg1_208	A	14	0.175	0.00173438	0.0416458
GCR_cBin5339_Ctg1_208	G	66	0.825	0.00173438	0.0416458
ESTNV_26088_606	C	63	0.7875	0.00215234	0.0463934
ESTNV_26088_606	G	17	0.2125	0.00215234	0.0463934
GCR_cBin16885_Ctg1_348	C	80	1	0	0
GCR_cBin24218_Ctg1_261	A	4	0.05	0.0005625	0.0237171
GCR_cBin24218_Ctg1_261	C	76	0.95	0.0005625	0.0237171
BASS136_B7_E01_171	A	3	0.0375	0.000433594	0.0208229
BASS136_B7_E01_171	G	77	0.9625	0.000433594	0.0208229
ESTV_12417_100	G	80	1	0	0
GCR_cBin4908_Ctg1_226	G	80	1	0	0
GCR_cBin10777_Ctg1_196	A	60	0.75	0.0021875	0.0467707
GCR_cBin10777_Ctg1_196	G	20	0.25	0.0021875	0.0467707
ESTV_12417_208	C	80	1	0	0
ESTV_16934_1328	G	80	1	0	0
ESTV_16934_1568	C	80	1	0	0
GCR_cBin13949_Ctg1_125	A	2	0.025	0.000296875	0.0172301
GCR_cBin13949_Ctg1_125	G	78	0.975	0.000296875	0.0172301
ESTNV_30017_552	A	15	0.1875	0.00146484	0.0382733
ESTNV_30017_552	C	65	0.8125	0.00146484	0.0382733
GCR_cBin4585_Ctg1_148	G	80	1	0	0
ESTNV_30017_158	A	15	0.1875	0.00146484	0.0382733
ESTNV_30017_158	T	65	0.8125	0.00146484	0.0382733
GCR_cBin44859_Ctg1_254	G	80	1	0	0
GCR_cBin14217_Ctg1_414	A	69	0.8625	0.00155859	0.039479
GCR_cBin14217_Ctg1_414	G	11	0.1375	0.00155859	0.039479
ESTNV_35114_720	A	2	0.025	0.000296875	0.0172301
ESTNV_35114_720	T	78	0.975	0.000296875	0.0172301
ESTV_15386_484	A	2	0.025	0.000296875	0.0172301
ESTV_15386_484	G	78	0.975	0.000296875	0.0172301
GCR_cBin44030_Ctg1_237	A	74	0.925	0.000796875	0.028229
GCR_cBin44030_Ctg1_237	G	6	0.075	0.000796875	0.028229
GCR_cBin992_Ctg1_309	A	80	1	0	0
GCR_cBin25010_Ctg1_148	A	80	1	0	0
GCR_hBin10171_Ctg1_182	C	28	0.35	0.0038125	0.0617454
GCR_hBin10171_Ctg1_182	G	52	0.65	0.0038125	0.0617454
GCR_cBin11431_Ctg1_401	A	67	0.8375	0.00168359	0.0410316
GCR_cBin11431_Ctg1_401	G	13	0.1625	0.00168359	0.0410316
ESTNV_25792_446	A	64	0.8	0.002125	0.0460977
ESTNV_25792_446	G	16	0.2	0.002125	0.0460977
ESTNV_25792_698	A	16	0.2	0.002125	0.0460977
ESTNV_25792_698	G	64	0.8	0.002125	0.0460977
ESTNV_23515_266	A	80	1	0	0
ESTV_15402_87	T	80	1	0	0
ESTNV_25525_410	A	26	0.325	0.00204688	0.0452424
ESTNV_25525_410	G	54	0.675	0.00204688	0.0452424
GCR_cBin12379_Ctg1_94	C	59	0.7375	0.00249609	0.0499609
GCR_cBin12379_Ctg1_94	G	21	0.2625	0.00249609	0.0499609
GCR_cBin39590_Ctg1_87	C	80	1	0	0
ESTNV_36346_1426	A	36	0.45	0.0024375	0.049371
ESTNV_36346_1426	G	44	0.55	0.0024375	0.049371
GCR_cBin29880_Ctg1_23	A	74	0.925	0.000796875	0.028229
GCR_cBin29880_Ctg1_23	C	6	0.075	0.000796875	0.028229
ESTNV_13974_873	C	80	1	0	0
GCR_cBin26310_Ctg1_189	A	60	0.810811	0.00195447	0.0442094
GCR_cBin26310_Ctg1_189	C	14	0.189189	0.00195447	0.0442094
GCR_cBin18612_Ctg1_67	A	7	0.0921053	0.000988665	0.031443
GCR_cBin18612_Ctg1_67	G	69	0.907895	0.000988665	0.031443
ESTNV_36358_242	A	2	0.025	0.000296875	0.0172301
ESTNV_36358_242	G	78	0.975	0.000296875	0.0172301
ESTV_14645_361	C	80	1	0	0
ESTV_14645_221	G	80	1	0	0
ESTNV_31662_122	A	2	0.025	0.000296875	0.0172301
ESTNV_31662_122	T	78	0.975	0.000296875	0.0172301
GCR_cBin37721_Ctg1_160	A	6	0.075	0.000796875	0.028229
GCR_cBin37721_Ctg1_160	G	74	0.925	0.000796875	0.028229
ESTNV_32316_1197	C	80	1	0	0
GCR_cBin20050_Ctg1_34	A	5	0.0625	0.000683594	0.0261456
GCR_cBin20050_Ctg1_34	C	75	0.9375	0.000683594	0.0261456
GCR_cBin27614_Ctg1_152	A	80	1	0	0
GCR_cBin31420_Ctg1_20	A	6	0.075	0.000796875	0.028229
GCR_cBin31420_Ctg1_20	G	74	0.925	0.000796875	0.028229
GCR_cBin7487_Ctg1_102	A	75	0.9375	0.000683594	0.0261456
GCR_cBin7487_Ctg1_102	G	5	0.0625	0.000683594	0.0261456
ESTV_17368_88	A	1	0.0125	0.000152344	0.0123428
ESTV_17368_88	G	79	0.9875	0.000152344	0.0123428
ESTV_14503_197	A	4	0.05	0.0005625	0.0237171
ESTV_14503_197	C	76	0.95	0.0005625	0.0237171
ESTNV_34237_82	A	4	0.05	0.0005625	0.0237171
ESTNV_34237_82	C	76	0.95	0.0005625	0.0237171
GCR_cBin13024_Ctg1_175	G	80	1	0	0
GCR_cBin13024_Ctg1_142	A	75	0.9375	0.000996094	0.031561
GCR_cBin13024_Ctg1_142	G	5	0.0625	0.000996094	0.031561
GCR_cBin13024_Ctg1_140	A	75	0.9375	0.000996094	0.031561
GCR_cBin13024_Ctg1_140	C	5	0.0625	0.000996094	0.031561
GCR_cBin34183_Ctg1_158	A	74	0.925	0.00110937	0.0333073
GCR_cBin34183_Ctg1_158	C	6	0.075	0.00110937	0.0333073
GCR_cBin34183_Ctg1_159	A	6	0.075	0.00110937	0.0333073
GCR_cBin34183_Ctg1_159	C	74	0.925	0.00110937	0.0333073
GCR_cBin42808_Ctg1_202	A	50	0.625	0.00242187	0.0492125
GCR_cBin42808_Ctg1_202	G	30	0.375	0.00242187	0.0492125
GCR_cBin6567_Ctg1_114	A	80	1	0	0
BASS111_B7_D03_407	C	78	1	0	0
GCR_hBin39311_Ctg1_131	C	80	1	0	0
ESTNV_36502_836	A	33	0.4125	0.00340234	0.0583296
ESTNV_36502_836	G	47	0.5875	0.00340234	0.0583296
BASS111_B7_D03_286	A	16	0.2	0.0018125	0.0425735
BASS111_B7_D03_286	C	64	0.8	0.0018125	0.0425735
BASS111_B7_D03_328	A	16	0.2	0.0018125	0.0425735
BASS111_B7_D03_328	G	64	0.8	0.0018125	0.0425735
GCR_hBin33430_Ctg1_182	G	80	1	0	0
GCR_cBin30182_Ctg1_141	A	80	1	0	0
ESTV_21750_731	A	72	1	0	0
ESTNV_35044_125	G	80	1	0	0
GCR_cBin17727_Ctg1_27	A	18	0.225	0.00217188	0.0466034
GCR_cBin17727_Ctg1_27	G	62	0.775	0.00217188	0.0466034
ESTV_15078_479	A	80	1	0	0
ESTV_15770_410	C	76	0.95	0.0005625	0.0237171
ESTV_15770_410	G	4	0.05	0.0005625	0.0237171
GCR_cBin20239_Ctg1_63	A	5	0.0625	0.000996094	0.031561
GCR_cBin20239_Ctg1_63	G	75	0.9375	0.000996094	0.031561
GCR_cBin19361_Ctg1_96	A	38	0.475	0.00185937	0.0431205
GCR_cBin19361_Ctg1_96	C	42	0.525	0.00185937	0.0431205
ESTNV_20218_62	A	3	0.0375	0.000433594	0.0208229
ESTNV_20218_62	G	77	0.9625	0.000433594	0.0208229
GCR_cBin37707_Ctg1_102	A	80	1	0	0
ESTNV_35887_1036	A	3	0.0375	0.000433594	0.0208229
ESTNV_35887_1036	C	77	0.9625	0.000433594	0.0208229
GCR_cBin13496_Ctg1_388	A	31	0.3875	0.00265234	0.0515009
GCR_cBin13496_Ctg1_388	G	49	0.6125	0.00265234	0.0515009
GCR_cBin6985_Ctg1_265	A	43	0.5375	0.00293359	0.0541627
GCR_cBin6985_Ctg1_265	G	37	0.4625	0.00293359	0.0541627
GCR_cBin5116_Ctg1_343	A	80	1	0	0
ESTNV_31531_916	A	58	0.725	0.00185937	0.0431205
ESTNV_31531_916	G	22	0.275	0.00185937	0.0431205
ESTV_18386_118	A	27	0.3375	0.00230859	0.0480478
ESTV_18386_118	G	53	0.6625	0.00230859	0.0480478
ESTV_18386_82	C	27	0.3375	0.00230859	0.0480478
ESTV_18386_82	G	53	0.6625	0.00230859	0.0480478
GCR_cBin4421_Ctg1_345	A	80	1	0	0
GCR_cBin4421_Ctg1_196	C	80	1	0	0
GCR_cBin33212_Ctg1_226	A	31	0.3875	0.00265234	0.0515009
GCR_cBin33212_Ctg1_226	C	49	0.6125	0.00265234	0.0515009
ESTNV_35525_1387	A	73	0.9125	0.000902344	0.030039
ESTNV_35525_1387	G	7	0.0875	0.000902344	0.030039
GCR_cBin793_Ctg1_69	A	74	0.925	0.00110937	0.0333073
GCR_cBin793_Ctg1_69	G	6	0.075	0.00110937	0.0333073
ESTNV_19126_343	A	4	0.05	0.0005625	0.0237171
ESTNV_19126_343	G	76	0.95	0.0005625	0.0237171
ESTNV_19750_154	A	4	0.05	0.0005625	0.0237171
ESTNV_19750_154	C	76	0.95	0.0005625	0.0237171
ESTV_16188_156	A	67	0.8375	0.00199609	0.0446777
ESTV_16188_156	G	13	0.1625	0.00199609	0.0446777
ESTNV_33045_743	C	79	0.9875	0.000152344	0.0123428
ESTNV_33045_743	G	1	0.0125	0.000152344	0.0123428
ESTV_16466_1044	A	57	0.7125	0.00215234	0.0463934
ESTV_16466_1044	C	23	0.2875	0.00215234	0.0463934
ESTNV_22986_1059	G	80	1	0	0
ESTV_16965_617	G	80	1	0	0
ESTNV_24241_102	C	80	1	0	0
GCR_hBin16599_Ctg1_79	C	80	1	0	0
ESTV_16604_550	C	80	1	0	0
GCR_cBin6090_Ctg1_166	C	80	1	0	0
ESTNV_14000_405	A	40	0.5	0.003125	0.0559017
ESTNV_14000_405	G	40	0.5	0.003125	0.0559017
GCR_cBin965_Ctg2_341	A	80	1	0	0
GCR_cBin965_Ctg2_356	C	78	1	0	0
ESTNV_14089_241	A	40	0.5	0.003125	0.0559017
ESTNV_14089_241	G	40	0.5	0.003125	0.0559017
ESTNV_29295_468	A	60	0.75	0.0021875	0.0467707
ESTNV_29295_468	C	20	0.25	0.0021875	0.0467707
ESTV_13454_78	A	80	1	0	0
ESTNV_30013_731	A	58	0.725	0.00217188	0.0466034
ESTNV_30013_731	C	22	0.275	0.00217188	0.0466034
GCR_cBin2972_Ctg1_58	A	76	0.95	0.0005625	0.0237171
GCR_cBin2972_Ctg1_58	G	4	0.05	0.0005625	0.0237171
ESTV_14757_562	A	72	0.9	0.001	0.0316228
ESTV_14757_562	G	8	0.1	0.001	0.0316228
ESTNV_33128_78	A	8	0.1	0.001625	0.0403113
ESTNV_33128_78	C	72	0.9	0.001625	0.0403113
ESTV_14757_521	A	16	0.2	0.00275	0.0524404
ESTV_14757_521	G	64	0.8	0.00275	0.0524404
ESTNV_33128_565	A	72	0.9	0.001625	0.0403113
ESTNV_33128_565	G	8	0.1	0.001625	0.0403113
BASS123_B7_B04_360	A	1	0.0125	0.000152344	0.0123428
BASS123_B7_B04_360	G	79	0.9875	0.000152344	0.0123428
ESTV_10850_97	C	80	1	0	0
ESTNV_23683_596	A	60	0.75	0.001875	0.0433013
ESTNV_23683_596	T	20	0.25	0.001875	0.0433013
GCR_cBin30866_Ctg1_113	C	80	1	0	0
ESTNV_37477_1100	A	59	0.7375	0.00187109	0.0432561
ESTNV_37477_1100	G	21	0.2625	0.00187109	0.0432561
GCR_cBin6066_Ctg1_86	A	33	0.4125	0.00215234	0.0463934
GCR_cBin6066_Ctg1_86	C	47	0.5875	0.00215234	0.0463934
ESTNV_37607_394	C	63	0.7875	0.00215234	0.0463934
ESTNV_37607_394	G	17	0.2125	0.00215234	0.0463934
GCR_cBin37571_Ctg1_142	A	60	0.75	0.001875	0.0433013
GCR_cBin37571_Ctg1_142	G	20	0.25	0.001875	0.0433013
GCR_hBin31975_Ctg1_231	A	20	0.25	0.001875	0.0433013
GCR_hBin31975_Ctg1_231	G	60	0.75	0.001875	0.0433013
GCR_cBin4660_Ctg1_268	A	78	0.975	0.000296875	0.0172301
GCR_cBin4660_Ctg1_268	G	2	0.025	0.000296875	0.0172301
GCR_cBin12244_Ctg1_232	A	19	0.2375	0.00280859	0.0529962
GCR_cBin12244_Ctg1_232	T	61	0.7625	0.00280859	0.0529962
GCR_cBin26088_Ctg1_476	A	19	0.2375	0.00280859	0.0529962
GCR_cBin26088_Ctg1_476	C	61	0.7625	0.00280859	0.0529962
GCR_cBin11191_Ctg1_173	A	1	0.0125	0.000152344	0.0123428
GCR_cBin11191_Ctg1_173	G	79	0.9875	0.000152344	0.0123428
GCR_cBin5159_Ctg1_408	A	24	0.3	0.0030625	0.0553399
GCR_cBin5159_Ctg1_408	C	56	0.7	0.0030625	0.0553399
GCR_cBin5806_Ctg1_138	G	80	1	0	0
GCR_cBin5806_Ctg1_204	C	80	1	0	0
GCR_cBin5159_Ctg1_487	A	78	0.975	0.000296875	0.0172301
GCR_cBin5159_Ctg1_487	G	2	0.025	0.000296875	0.0172301
GCR_cBin27882_Ctg1_69	A	69	0.8625	0.00124609	0.0353001
GCR_cBin27882_Ctg1_69	C	11	0.1375	0.00124609	0.0353001
GCR_cBin33065_Ctg1_159	A	66	0.825	0.00173438	0.0416458
GCR_cBin33065_Ctg1_159	G	14	0.175	0.00173438	0.0416458
GCR_cBin27882_Ctg1_116	A	80	1	0	0
GCR_cBin715_Ctg1_93	C	79	0.9875	0.000152344	0.0123428
GCR_cBin715_Ctg1_93	G	1	0.0125	0.000152344	0.0123428
ESTNV_32731_625	A	55	0.6875	0.00271484	0.0521042
ESTNV_32731_625	T	25	0.3125	0.00271484	0.0521042
BASS138_B7_B10_378	G	80	1	0	0
BASS15_B7_A08_510	T	80	1	0	0
BASS138_B7_B10_225	A	75	0.9375	0.000683594	0.0261456
BASS138_B7_B10_225	T	5	0.0625	0.000683594	0.0261456
BASS138_B7_B10_200	A	75	0.9375	0.000683594	0.0261456
BASS138_B7_B10_200	C	5	0.0625	0.000683594	0.0261456
GCR_cBin48196_Ctg1_36	A	80	1	0	0
GCR_cBin48196_Ctg1_63	A	80	1	0	0
GCR_cBin15004_Ctg1_309	A	80	1	0	0
GCR_cBin15004_Ctg1_154	A	1	0.0125	0.000152344	0.0123428
GCR_cBin15004_Ctg1_154	C	79	0.9875	0.000152344	0.0123428
GCR_cBin10002_Ctg1_178	A	13	0.171053	0.00182698	0.0427432
GCR_cBin10002_Ctg1_178	T	63	0.828947	0.00182698	0.0427432
ESTNV_29033_400	A	58	0.725	0.00248438	0.0498435
ESTNV_29033_400	C	22	0.275	0.00248438	0.0498435
ESTV_14722_480	A	50	0.625	0.00273437	0.0522913
ESTV_14722_480	G	30	0.375	0.00273437	0.0522913
ESTV_16691_375	A	3	0.0375	0.000433594	0.0208229
ESTV_16691_375	C	77	0.9625	0.000433594	0.0208229
ESTNV_37022_1170	C	77	0.9625	0.000433594	0.0208229
ESTNV_37022_1170	G	3	0.0375	0.000433594	0.0208229
GCR_cBin29826_Ctg1_167	C	72	0.9	0.001	0.0316228
GCR_cBin29826_Ctg1_167	G	8	0.1	0.001	0.0316228
GCR_cBin26631_Ctg1_386	A	24	0.3	0.002125	0.0460977
GCR_cBin26631_Ctg1_386	G	56	0.7	0.002125	0.0460977
ESTNV_33546_190	C	12	0.15	0.001625	0.0403113
ESTNV_33546_190	G	68	0.85	0.001625	0.0403113
ESTV_18022_968	A	5	0.0625	0.000683594	0.0261456
ESTV_18022_968	C	75	0.9375	0.000683594	0.0261456
GCR_cBin33117_Ctg1_151	A	47	0.5875	0.00308984	0.0555864
GCR_cBin33117_Ctg1_151	G	33	0.4125	0.00308984	0.0555864
ESTNV_37221_2328	A	1	0.0125	0.000152344	0.0123428
ESTNV_37221_2328	G	79	0.9875	0.000152344	0.0123428
ESTV_20832_153	A	79	0.9875	0.000152344	0.0123428
ESTV_20832_153	T	1	0.0125	0.000152344	0.0123428
ESTNV_31902_575	A	36	0.45	0.0024375	0.049371
ESTNV_31902_575	C	44	0.55	0.0024375	0.049371
GCR_hBin35499_Ctg1_49	A	78	0.975	0.000296875	0.0172301
GCR_hBin35499_Ctg1_49	G	2	0.025	0.000296875	0.0172301
GCR_cBin16471_Ctg1_206	C	72	1	0	0
GCR_cBin16471_Ctg1_71	T	80	1	0	0
GCR_cBin16471_Ctg1_124	A	80	1	0	0
ESTNV_27014_209	A	58	0.725	0.00185937	0.0431205
ESTNV_27014_209	C	22	0.275	0.00185937	0.0431205
GCR_cBin15459_Ctg1_100	A	80	1	0	0
GCR_cBin16478_Ctg1_193	A	52	0.65	0.002875	0.053619
GCR_cBin16478_Ctg1_193	G	28	0.35	0.002875	0.053619
GCR_cBin16478_Ctg1_145	A	58	0.725	0.00185937	0.0431205
GCR_cBin16478_Ctg1_145	C	22	0.275	0.00185937	0.0431205
ESTV_13924_444	A	47	0.5875	0.00340234	0.0583296
ESTV_13924_444	G	33	0.4125	0.00340234	0.0583296
GCR_cBin15021_Ctg1_82	A	59	0.7375	0.00218359	0.0467289
GCR_cBin15021_Ctg1_82	G	21	0.2625	0.00218359	0.0467289
GCR_cBin15223_Ctg1_361	A	80	1	0	0
GCR_cBin13670_Ctg1_82	A	80	1	0	0
GCR_cBin17273_Ctg1_191	C	26	0.325	0.00298438	0.0546294
GCR_cBin17273_Ctg1_191	G	54	0.675	0.00298438	0.0546294
ESTNV_35671_745	A	68	0.85	0.0019375	0.044017
ESTNV_35671_745	G	12	0.15	0.0019375	0.044017
GCR_cBin2437_Ctg1_74	A	80	1	0	0
ESTV_20002_108	A	65	0.8125	0.00146484	0.0382733
ESTV_20002_108	C	15	0.1875	0.00146484	0.0382733
ESTNV_27042_601	A	70	0.875	0.00117187	0.0342327
ESTNV_27042_601	G	10	0.125	0.00117187	0.0342327
GCR_cBin5673_Ctg1_49	C	32	0.410256	0.00225897	0.0475287
GCR_cBin5673_Ctg1_49	G	46	0.589744	0.00225897	0.0475287
ESTNV_14277_249	A	1	0.0151515	0.000222612	0.0149202
ESTNV_14277_249	G	65	0.984848	0.000222612	0.0149202
ESTV_21870_705	A	68	0.85	0.001625	0.0403113
ESTV_21870_705	G	12	0.15	0.001625	0.0403113
ESTNV_32741_523	G	74	1	0	0
ESTNV_24857_790	A	18	0.230769	0.00225054	0.0474399
ESTNV_24857_790	C	60	0.769231	0.00225054	0.0474399
GCR_cBin37659_Ctg1_151	G	80	1	0	0
GCR_cBin31955_Ctg1_100	A	51	0.6375	0.00280859	0.0529962
GCR_cBin31955_Ctg1_100	C	29	0.3625	0.00280859	0.0529962
GCR_cBin27635_Ctg1_277	G	80	1	0	0
GCR_cBin20771_Ctg1_93	A	80	1	0	0
GCR_cBin33206_Ctg1_109	A	80	1	0	0
GCR_cBin39280_Ctg1_175	A	29	0.3625	0.00280859	0.0529962
GCR_cBin39280_Ctg1_175	G	51	0.6375	0.00280859	0.0529962
GCR_cBin8844_Ctg1_179	C	76	1	0	0
GCR_cBin3000_Ctg1_193	A	80	1	0	0
GCR_cBin13782_Ctg1_64	A	62	0.775	0.00217188	0.0466034
GCR_cBin13782_Ctg1_64	G	18	0.225	0.00217188	0.0466034
GCR_cBin13782_Ctg1_67	A	18	0.225	0.00217188	0.0466034
GCR_cBin13782_Ctg1_67	G	62	0.775	0.00217188	0.0466034
GCR_cBin4290_Ctg1_99	A	65	0.8125	0.00146484	0.0382733
GCR_cBin4290_Ctg1_99	G	15	0.1875	0.00146484	0.0382733
ESTV_14384_381	G	80	1	0	0
ESTV_14384_462	A	32	0.4	0.00225	0.0474342
ESTV_14384_462	G	48	0.6	0.00225	0.0474342
GCR_cBin6121_Ctg1_367	A	51	0.6375	0.00343359	0.0585969
GCR_cBin6121_Ctg1_367	G	29	0.3625	0.00343359	0.0585969
ESTNV_17668_287	C	78	1	0	0
GCR_cBin40305_Ctg1_70	A	2	0.025	0.000296875	0.0172301
GCR_cBin40305_Ctg1_70	C	78	0.975	0.000296875	0.0172301
ESTNV_30479_547	A	80	1	0	0
ESTNV_31404_229	G	80	1	0	0
ESTNV_30479_231	G	80	1	0	0
GCR_cBin1265_Ctg1_271	A	80	1	0	0
ESTV_13564_420	A	80	1	0	0
ESTNV_33910_178	A	23	0.2875	0.00183984	0.0428934
ESTNV_33910_178	G	57	0.7125	0.00183984	0.0428934
ESTNV_34839_90	A	7	0.0875	0.000902344	0.030039
ESTNV_34839_90	C	73	0.9125	0.000902344	0.030039
GCR_cBin10569_Ctg1_129	A	34	0.425	0.00204688	0.0452424
GCR_cBin10569_Ctg1_129	T	46	0.575	0.00204688	0.0452424
GCR_cBin9725_Ctg1_201	A	80	1	0	0
GCR_cBin1989_Ctg1_199	A	3	0.0375	0.000433594	0.0208229
GCR_cBin1989_Ctg1_199	G	77	0.9625	0.000433594	0.0208229
ESTNV_31700_458	A	80	1	0	0
ESTV_15483_482	A	77	0.9625	0.000433594	0.0208229
ESTV_15483_482	G	3	0.0375	0.000433594	0.0208229
ESTV_15483_319	A	3	0.0375	0.000433594	0.0208229
ESTV_15483_319	C	77	0.9625	0.000433594	0.0208229
ESTV_15483_283	A	77	0.9625	0.000433594	0.0208229
ESTV_15483_283	G	3	0.0375	0.000433594	0.0208229
ESTNV_33733_642	A	80	1	0	0
GCR_cBin13944_Ctg1_178	A	3	0.0375	0.000433594	0.0208229
GCR_cBin13944_Ctg1_178	G	77	0.9625	0.000433594	0.0208229
GCR_cBin25656_Ctg1_179	A	80	1	0	0
GCR_cBin41229_Ctg1_194	A	77	0.9625	0.000433594	0.0208229
GCR_cBin41229_Ctg1_194	G	3	0.0375	0.000433594	0.0208229
ESTNV_33473_135	T	80	1	0	0
ESTV_21735_605	G	78	1	0	0
GCR_cBin3012_Ctg1_287	G	80	1	0	0
ESTNV_34441_695	C	57	0.7125	0.00246484	0.0496472
ESTNV_34441_695	G	23	0.2875	0.00246484	0.0496472
GCR_cBin23239_Ctg1_26	A	24	0.3	0.00275	0.0524404
GCR_cBin23239_Ctg1_26	G	56	0.7	0.00275	0.0524404
ESTNV_30427_157	G	80	1	0	0
ESTNV_35667_737	A	3	0.0375	0.000433594	0.0208229
ESTNV_35667_737	G	77	0.9625	0.000433594	0.0208229
GCR_cBin9838_Ctg1_90	G	80	1	0	0
ESTNV_37037_693	A	73	0.9125	0.000902344	0.030039
ESTNV_37037_693	G	7	0.0875	0.000902344	0.030039
ESTV_12974_407	A	77	0.9625	0.000433594	0.0208229
ESTV_12974_407	G	3	0.0375	0.000433594	0.0208229
ESTNV_24496_456	A	7	0.0875	0.000902344	0.030039
ESTNV_24496_456	G	73	0.9125	0.000902344	0.030039
ESTNV_31072_1031	A	77	0.9625	0.000433594	0.0208229
ESTNV_31072_1031	T	3	0.0375	0.000433594	0.0208229
ESTV_12974_300	A	73	0.9125	0.000902344	0.030039
ESTV_12974_300	G	7	0.0875	0.000902344	0.030039
ESTNV_31072_1221	A	7	0.0897436	0.000944048	0.0307254
ESTNV_31072_1221	T	71	0.910256	0.000944048	0.0307254
GCR_cBin4748_Ctg1_165	A	76	0.95	0.0005625	0.0237171
GCR_cBin4748_Ctg1_165	G	4	0.05	0.0005625	0.0237171
ESTNV_36029_386	A	3	0.0375	0.000433594	0.0208229
ESTNV_36029_386	C	77	0.9625	0.000433594	0.0208229
GCR_cBin41664_Ctg1_107	A	10	0.125	0.00179688	0.0423896
GCR_cBin41664_Ctg1_107	G	70	0.875	0.00179688	0.0423896
ESTNV_33377_117	A	80	1	0	0
ESTNV_32544_888	A	80	1	0	0
ESTV_16219_102	A	1	0.0125	0.000152344	0.0123428
ESTV_16219_102	C	79	0.9875	0.000152344	0.0123428
GCR_cBin24154_Ctg1_116	A	40	0.5	0	0
GCR_cBin24154_Ctg1_116	G	40	0.5	0	0
ESTNV_36125_1524	A	80	1	0	0
ESTNV_32977_454	G	80	1	0	0
ESTNV_36125_1625	A	80	1	0	0
GCR_hBin36356_Ctg1_59	A	9	0.1125	0.00108984	0.0330128
GCR_hBin36356_Ctg1_59	C	71	0.8875	0.00108984	0.0330128
ESTNV_12926_381	C	80	1	0	0
ESTNV_31421_450	A	70	0.875	0.00117187	0.0342327
ESTNV_31421_450	G	10	0.125	0.00117187	0.0342327
ESTNV_25560_280	A	77	0.9625	0.000433594	0.0208229
ESTNV_25560_280	C	3	0.0375	0.000433594	0.0208229
ESTNV_25560_563	A	77	0.9625	0.000433594	0.0208229
ESTNV_25560_563	C	3	0.0375	0.000433594	0.0208229
ESTNV_36961_536	A	80	1	0	0
GCR_cBin35192_Ctg1_126	A	10	0.125	0.00117187	0.0342327
GCR_cBin35192_Ctg1_126	G	70	0.875	0.00117187	0.0342327
GCR_cBin37731_Ctg1_46	A	25	0.3125	0.00333984	0.0577914
GCR_cBin37731_Ctg1_46	G	55	0.6875	0.00333984	0.0577914
GCR_cBin42489_Ctg1_138	A	35	0.4375	0.00380859	0.0617138
GCR_cBin42489_Ctg1_138	G	45	0.5625	0.00380859	0.0617138
ESTNV_34292_856	A	71	0.8875	0.00108984	0.0330128
ESTNV_34292_856	G	9	0.1125	0.00108984	0.0330128
ESTNV_36824_935	G	80	1	0	0
ESTNV_19820_181	G	80	1	0	0
GCR_cBin16481_Ctg1_303	G	80	1	0	0
GCR_cBin16481_Ctg1_250	G	80	1	0	0
ESTNV_35445_1459	A	7	0.0875	0.000902344	0.030039
ESTNV_35445_1459	G	73	0.9125	0.000902344	0.030039
BASS15_B7_D02_365	A	54	0.675	0.00267188	0.0516902
BASS15_B7_D02_365	C	26	0.325	0.00267188	0.0516902
ESTNV_24131_116	A	73	0.9125	0.000902344	0.030039
ESTNV_24131_116	G	7	0.0875	0.000902344	0.030039
GCR_cBin11254_Ctg1_609	G	80	1	0	0
GCR_cBin2792_Ctg2_200	G	80	1	0	0
GCR_cBin22326_Ctg1_100	A	5	0.0625	0.000683594	0.0261456
GCR_cBin22326_Ctg1_100	C	75	0.9375	0.000683594	0.0261456
ESTNV_37714_614	A	80	1	0	0
ESTNV_36439_150	A	16	0.2	0.0024375	0.049371
ESTNV_36439_150	G	64	0.8	0.0024375	0.049371
GCR_cBin5664_Ctg1_209	A	26	0.325	0.00173438	0.0416458
GCR_cBin5664_Ctg1_209	G	54	0.675	0.00173438	0.0416458
ESTNV_34557_1347	A	22	0.275	0.00154688	0.0393303
ESTNV_34557_1347	T	58	0.725	0.00154688	0.0393303
GCR_cBin44576_Ctg1_193	A	80	1	0	0
GCR_cBin45714_Ctg1_104	A	17	0.2125	0.00152734	0.0390812
GCR_cBin45714_Ctg1_104	G	63	0.7875	0.00152734	0.0390812
GCR_cBin45714_Ctg1_163	A	17	0.2125	0.00152734	0.0390812
GCR_cBin45714_Ctg1_163	G	63	0.7875	0.00152734	0.0390812
GCR_cBin3879_Ctg2_509	A	13	0.1625	0.00137109	0.0370283
GCR_cBin3879_Ctg2_509	G	67	0.8375	0.00137109	0.0370283
GCR_cBin3879_Ctg2_583	A	3	0.0375	0.000433594	0.0208229
GCR_cBin3879_Ctg2_583	C	77	0.9625	0.000433594	0.0208229
ESTNV_24819_592	A	3	0.0375	0.000433594	0.0208229
ESTNV_24819_592	C	77	0.9625	0.000433594	0.0208229
ESTNV_32405_190	A	69	0.8625	0.00155859	0.039479
ESTNV_32405_190	G	11	0.1375	0.00155859	0.039479
ESTV_14471_319	A	58	0.725	0.00248438	0.0498435
ESTV_14471_319	G	22	0.275	0.00248438	0.0498435
GCR_cBin12431_Ctg1_38	A	80	1	0	0
ESTNV_27336_508	C	80	1	0	0
GCR_hBin29120_Ctg1_93	A	9	0.115385	0.00113792	0.033733
GCR_hBin29120_Ctg1_93	G	69	0.884615	0.00113792	0.033733
GCR_cBin17643_Ctg1_30	A	79	0.9875	0.000152344	0.0123428
GCR_cBin17643_Ctg1_30	C	1	0.0125	0.000152344	0.0123428
ESTNV_36866_1976	C	43	0.5375	0.00199609	0.0446777
ESTNV_36866_1976	G	37	0.4625	0.00199609	0.0446777
ESTNV_36866_301	A	34	0.425	0.00298438	0.0546294
ESTNV_36866_301	G	46	0.575	0.00298438	0.0546294
ESTNV_27183_516	A	42	0.525	0.00310938	0.0557618
ESTNV_27183_516	G	38	0.475	0.00310938	0.0557618
ESTNV_27883_555	A	38	0.475	0.00310938	0.0557618
ESTNV_27883_555	G	42	0.525	0.00310938	0.0557618
ESTNV_24999_794	A	80	1	0	0
GCR_cBin30724_Ctg1_45	T	80	1	0	0
ESTNV_27883_858	A	38	0.475	0.00310938	0.0557618
ESTNV_27883_858	C	42	0.525	0.00310938	0.0557618
GCR_cBin41061_Ctg1_275	A	38	0.475	0.00310938	0.0557618
GCR_cBin41061_Ctg1_275	G	42	0.525	0.00310938	0.0557618
ESTNV_33585_602	G	80	1	0	0
GCR_cBin1088_Ctg1_120	A	27	0.3375	0.00230859	0.0480478
GCR_cBin1088_Ctg1_120	C	53	0.6625	0.00230859	0.0480478
ESTNV_36276_161	A	21	0.2625	0.00249609	0.0499609
ESTNV_36276_161	C	59	0.7375	0.00249609	0.0499609
ESTNV_36026_1431	A	66	0.846154	0.00169423	0.041161
ESTNV_36026_1431	G	12	0.153846	0.00169423	0.041161
GCR_cBin1660_Ctg1_90	C	80	1	0	0
GCR_cBin48527_Ctg1_243	C	80	1	0	0
ESTNV_37606_918	A	79	0.9875	0.000152344	0.0123428
ESTNV_37606_918	G	1	0.0125	0.000152344	0.0123428
GCR_cBin46100_Ctg1_157	A	63	0.7875	0.00183984	0.0428934
GCR_cBin46100_Ctg1_157	C	17	0.2125	0.00183984	0.0428934
ESTNV_32645_328	A	73	0.9125	0.000902344	0.030039
ESTNV_32645_328	G	7	0.0875	0.000902344	0.030039
ESTV_15243_314	A	73	0.9125	0.000902344	0.030039
ESTV_15243_314	G	7	0.0875	0.000902344	0.030039
GCR_cBin30698_Ctg1_184	A	68	0.85	0.0013125	0.0362284
GCR_cBin30698_Ctg1_184	G	12	0.15	0.0013125	0.0362284
ESTNV_30512_474	A	41	0.5125	0.00171484	0.0414107
ESTNV_30512_474	G	39	0.4875	0.00171484	0.0414107
ESTV_14194_507	A	7	0.0875	0.000902344	0.030039
ESTV_14194_507	G	73	0.9125	0.000902344	0.030039
ESTNV_35530_507	A	7	0.0875	0.000902344	0.030039
ESTNV_35530_507	G	73	0.9125	0.000902344	0.030039
ESTNV_30992_1251	G	80	1	0	0
ESTNV_33949_1357	A	31	0.3875	0.00233984	0.0483719
ESTNV_33949_1357	C	49	0.6125	0.00233984	0.0483719
GCR_cBin50513_Ctg1_37	A	46	0.575	0.00298438	0.0546294
GCR_cBin50513_Ctg1_37	T	34	0.425	0.00298438	0.0546294
ESTNV_21223_122	A	79	0.9875	0.000152344	0.0123428
ESTNV_21223_122	G	1	0.0125	0.000152344	0.0123428
ESTNV_28443_245	A	14	0.175	0.00142187	0.0377078
ESTNV_28443_245	C	66	0.825	0.00142187	0.0377078
ESTNV_23548_82	A	22	0.275	0.00185937	0.0431205
ESTNV_23548_82	C	58	0.725	0.00185937	0.0431205
ESTNV_33402_1114	A	14	0.175	0.00142187	0.0377078
ESTNV_33402_1114	G	66	0.825	0.00142187	0.0377078
GCR_cBin14491_Ctg1_252	G	80	1	0	0
ESTNV_23548_451	A	61	0.7625	0.00187109	0.0432561
ESTNV_23548_451	T	19	0.2375	0.00187109	0.0432561
GCR_cBin2575_Ctg1_167	A	80	1	0	0
ESTV_14686_659	A	75	0.9375	0.000683594	0.0261456
ESTV_14686_659	C	5	0.0625	0.000683594	0.0261456
ESTV_14686_263	A	75	0.9375	0.000683594	0.0261456
ESTV_14686_263	C	5	0.0625	0.000683594	0.0261456
ESTV_16910_318	G	80	1	0	0
ESTV_16910_387	C	80	1	0	0
GCR_cBin7169_Ctg1_691	G	80	1	0	0
GCR_cBin14271_Ctg1_54	A	9	0.115385	0.00179538	0.0423719
GCR_cBin14271_Ctg1_54	C	69	0.884615	0.00179538	0.0423719
GCR_cBin8057_Ctg1_186	A	8	0.1	0.001625	0.0403113
GCR_cBin8057_Ctg1_186	G	72	0.9	0.001625	0.0403113
ESTNV_36052_1230	A	1	0.0125	0.000152344	0.0123428
[truncated: 5,693 more rows]

## Sheet: BA_Kun
File S1. SNP allele frequencies per population. LL_SYS
SNP_ID	Allele	Count	Frequency	Variance	SD
GCR_cBin24032_Ctg1_76	A	5	0.0641026	0.000716465	0.0267669
GCR_cBin24032_Ctg1_76	T	73	0.935897	0.000716465	0.0267669
GCR_cBin13749_Ctg1_18	A	22	0.275	0.00279687	0.0528855
GCR_cBin13749_Ctg1_18	C	58	0.725	0.00279687	0.0528855
ESTNV_28684_665	A	54	0.675	0.00298438	0.0546294
ESTNV_28684_665	G	26	0.325	0.00298438	0.0546294
GCR_cBin32777_Ctg1_66	C	40	0.5	0.0028125	0.053033
GCR_cBin32777_Ctg1_66	G	40	0.5	0.0028125	0.053033
GCR_cBin13749_Ctg1_171	A	80	1	0	0
GCR_cBin22083_Ctg1_38	A	30	0.375	0.00304688	0.0551985
GCR_cBin22083_Ctg1_38	C	50	0.625	0.00304688	0.0551985
GCR_cBin7800_Ctg1_739	A	57	0.7125	0.00277734	0.0527005
GCR_cBin7800_Ctg1_739	T	23	0.2875	0.00277734	0.0527005
ESTV_16768_432	A	78	0.975	0.000296875	0.0172301
ESTV_16768_432	T	2	0.025	0.000296875	0.0172301
GCR_cBin42907_Ctg1_150	C	56	0.7	0.00275	0.0524404
GCR_cBin42907_Ctg1_150	G	24	0.3	0.00275	0.0524404
GCR_rBin14981_Ctg1_193	A	62	0.775	0.00185937	0.0431205
GCR_rBin14981_Ctg1_193	C	18	0.225	0.00185937	0.0431205
ESTNV_26586_283	A	5	0.0625	0.000683594	0.0261456
ESTNV_26586_283	T	75	0.9375	0.000683594	0.0261456
ESTNV_34251_1165	A	70	0.875	0.00148438	0.0385276
ESTNV_34251_1165	G	10	0.125	0.00148438	0.0385276
ESTNV_34453_617	A	32	0.4	0.0025625	0.0506211
ESTNV_34453_617	G	48	0.6	0.0025625	0.0506211
GCR_cBin5720_Ctg1_153	C	7	0.0875	0.000902344	0.030039
GCR_cBin5720_Ctg1_153	G	73	0.9125	0.000902344	0.030039
ESTV_13344_491	A	52	0.65	0.0038125	0.0617454
ESTV_13344_491	C	28	0.35	0.0038125	0.0617454
ESTNV_32810_1998	A	28	0.35	0.0038125	0.0617454
ESTNV_32810_1998	C	52	0.65	0.0038125	0.0617454
ESTV_12810_403	A	10	0.125	0.00117187	0.0342327
ESTV_12810_403	G	70	0.875	0.00117187	0.0342327
ESTV_12810_361	A	10	0.125	0.00117187	0.0342327
ESTV_12810_361	G	70	0.875	0.00117187	0.0342327
ESTNV_30347_550	A	10	0.125	0.00117187	0.0342327
ESTNV_30347_550	T	70	0.875	0.00117187	0.0342327
ESTNV_27471_81	A	68	0.85	0.0013125	0.0362284
ESTNV_27471_81	G	12	0.15	0.0013125	0.0362284
GCR_cBin23673_Ctg1_272	A	16	0.2	0.0015	0.0387298
GCR_cBin23673_Ctg1_272	G	64	0.8	0.0015	0.0387298
GCR_cBin49919_Ctg1_51	A	24	0.3	0.003375	0.0580948
GCR_cBin49919_Ctg1_51	C	56	0.7	0.003375	0.0580948
GCR_cBin3018_Ctg1_120	A	76	0.95	0.0005625	0.0237171
GCR_cBin3018_Ctg1_120	G	4	0.05	0.0005625	0.0237171
GCR_cBin3018_Ctg1_570	A	76	0.95	0.0005625	0.0237171
GCR_cBin3018_Ctg1_570	C	4	0.05	0.0005625	0.0237171
GCR_cBin3018_Ctg1_511	A	4	0.05	0.0005625	0.0237171
GCR_cBin3018_Ctg1_511	G	76	0.95	0.0005625	0.0237171
GCR_cBin8091_Ctg1_197	A	2	0.025	0.000296875	0.0172301
GCR_cBin8091_Ctg1_197	T	78	0.975	0.000296875	0.0172301
GCR_cBin8091_Ctg1_368	A	80	1	0	0
GCR_cBin38678_Ctg1_119	A	40	0.5	0.003125	0.0559017
GCR_cBin38678_Ctg1_119	G	40	0.5	0.003125	0.0559017
GCR_cBin26178_Ctg1_157	A	14	0.175	0.00173438	0.0416458
GCR_cBin26178_Ctg1_157	T	66	0.825	0.00173438	0.0416458
ESTNV_35287_375	A	15	0.1875	0.00177734	0.0421586
ESTNV_35287_375	G	65	0.8125	0.00177734	0.0421586
ESTNV_32999_885	A	68	0.85	0.001625	0.0403113
ESTNV_32999_885	G	12	0.15	0.001625	0.0403113
ESTV_13371_209	C	80	1	0	0
ESTNV_20700_631	A	12	0.15	0.001625	0.0403113
ESTNV_20700_631	G	68	0.85	0.001625	0.0403113
ESTNV_34751_1764	A	11	0.1375	0.00124609	0.0353001
ESTNV_34751_1764	C	69	0.8625	0.00124609	0.0353001
ESTNV_34751_1633	A	11	0.1375	0.00124609	0.0353001
ESTNV_34751_1633	G	69	0.8625	0.00124609	0.0353001
GCR_cBin4736_Ctg1_83	A	64	0.8	0.0018125	0.0425735
GCR_cBin4736_Ctg1_83	G	16	0.2	0.0018125	0.0425735
ESTNV_35283_192	A	2	0.025	0.000296875	0.0172301
ESTNV_35283_192	C	78	0.975	0.000296875	0.0172301
GCR_cBin30159_Ctg1_115	A	47	0.5875	0.00277734	0.0527005
GCR_cBin30159_Ctg1_115	G	33	0.4125	0.00277734	0.0527005
GCR_cBin20874_Ctg1_187	A	59	0.7375	0.00187109	0.0432561
GCR_cBin20874_Ctg1_187	G	21	0.2625	0.00187109	0.0432561
GCR_cBin7930_Ctg1_81	A	55	0.6875	0.00208984	0.0457148
GCR_cBin7930_Ctg1_81	G	25	0.3125	0.00208984	0.0457148
GCR_cBin12902_Ctg1_491	A	75	0.9375	0.000683594	0.0261456
GCR_cBin12902_Ctg1_491	G	5	0.0625	0.000683594	0.0261456
ESTNV_32983_812	A	43	0.5375	0.00199609	0.0446777
ESTNV_32983_812	G	37	0.4625	0.00199609	0.0446777
ESTV_11898_329	G	80	1	0	0
ESTV_11898_340	C	80	1	0	0
ESTNV_26718_947	A	52	0.65	0.002875	0.053619
ESTNV_26718_947	G	28	0.35	0.002875	0.053619
ESTV_16673_1575	A	8	0.1	0.0013125	0.0362284
ESTV_16673_1575	G	72	0.9	0.0013125	0.0362284
GCR_cBin47076_Ctg1_116	A	17	0.2125	0.00183984	0.0428934
GCR_cBin47076_Ctg1_116	G	63	0.7875	0.00183984	0.0428934
GCR_cBin38737_Ctg1_101	A	77	0.9625	0.000433594	0.0208229
GCR_cBin38737_Ctg1_101	G	3	0.0375	0.000433594	0.0208229
GCR_cBin29198_Ctg1_37	A	61	0.7625	0.00218359	0.0467289
GCR_cBin29198_Ctg1_37	C	19	0.2375	0.00218359	0.0467289
GCR_cBin31010_Ctg1_231	A	2	0.025	0.000296875	0.0172301
GCR_cBin31010_Ctg1_231	C	78	0.975	0.000296875	0.0172301
GCR_cBin42440_Ctg1_139	A	79	0.9875	0.000152344	0.0123428
GCR_cBin42440_Ctg1_139	G	1	0.0125	0.000152344	0.0123428
ESTNV_32327_914	A	39	0.4875	0.00233984	0.0483719
ESTNV_32327_914	G	41	0.5125	0.00233984	0.0483719
GCR_hBin38301_Ctg1_117	T	80	1	0	0
ESTV_16226_67	A	74	0.925	0.00110937	0.0333073
ESTV_16226_67	G	6	0.075	0.00110937	0.0333073
GCR_cBin8657_Ctg1_79	A	72	0.9	0.0013125	0.0362284
GCR_cBin8657_Ctg1_79	C	8	0.1	0.0013125	0.0362284
ESTV_20115_337	A	12	0.15	0.001625	0.0403113
ESTV_20115_337	G	68	0.85	0.001625	0.0403113
GCR_cBin15162_Ctg1_205	A	29	0.3625	0.00249609	0.0499609
GCR_cBin15162_Ctg1_205	C	51	0.6375	0.00249609	0.0499609
GCR_cBin21922_Ctg1_271	A	18	0.225	0.00154688	0.0393303
GCR_cBin21922_Ctg1_271	G	62	0.775	0.00154688	0.0393303
GCR_cBin21922_Ctg1_272	A	50	0.625	0.00242187	0.0492125
GCR_cBin21922_Ctg1_272	C	30	0.375	0.00242187	0.0492125
ESTNV_28147_868	A	6	0.075	0.00110937	0.0333073
ESTNV_28147_868	T	74	0.925	0.00110937	0.0333073
GCR_cBin17189_Ctg1_418	A	66	0.825	0.00173438	0.0416458
GCR_cBin17189_Ctg1_418	G	14	0.175	0.00173438	0.0416458
GCR_cBin34_Ctg1_596	A	22	0.275	0.00248438	0.0498435
GCR_cBin34_Ctg1_596	C	58	0.725	0.00248438	0.0498435
GCR_cBin2124_Ctg1_298	A	48	0.6	0.002875	0.053619
GCR_cBin2124_Ctg1_298	G	32	0.4	0.002875	0.053619
ESTNV_36830_1365	A	1	0.0125	0.000152344	0.0123428
ESTNV_36830_1365	G	79	0.9875	0.000152344	0.0123428
ESTV_16585_88	A	77	0.9625	0.000433594	0.0208229
ESTV_16585_88	G	3	0.0375	0.000433594	0.0208229
GCR_cBin33029_Ctg1_110	A	46	0.575	0.00267188	0.0516902
GCR_cBin33029_Ctg1_110	G	34	0.425	0.00267188	0.0516902
ESTNV_35593_589	A	37	0.4625	0.00262109	0.0511966
ESTNV_35593_589	G	43	0.5375	0.00262109	0.0511966
GCR_cBin29162_Ctg1_328	A	72	0.9	0.001	0.0316228
GCR_cBin29162_Ctg1_328	G	8	0.1	0.001	0.0316228
GCR_cBin29853_Ctg1_324	A	43	0.5375	0.00262109	0.0511966
GCR_cBin29853_Ctg1_324	T	37	0.4625	0.00262109	0.0511966
GCR_cBin4502_Ctg2_241	C	50	0.625	0.00210938	0.0459279
GCR_cBin4502_Ctg2_241	G	30	0.375	0.00210938	0.0459279
ESTNV_35593_1402	A	49	0.6125	0.00233984	0.0483719
ESTNV_35593_1402	G	31	0.3875	0.00233984	0.0483719
GCR_cBin7483_Ctg1_160	A	74	0.925	0.000796875	0.028229
GCR_cBin7483_Ctg1_160	G	6	0.075	0.000796875	0.028229
GCR_hBin16230_Ctg1_42	A	1	0.0125	0.000152344	0.0123428
GCR_hBin16230_Ctg1_42	G	79	0.9875	0.000152344	0.0123428
ESTNV_35108_1142	A	80	1	0	0
ESTNV_32740_1792	A	62	0.775	0.00185937	0.0431205
ESTNV_32740_1792	T	18	0.225	0.00185937	0.0431205
ESTNV_18010_624	A	80	1	0	0
ESTNV_33627_835	A	30	0.375	0.00273437	0.0522913
ESTNV_33627_835	G	50	0.625	0.00273437	0.0522913
ESTNV_33761_306	A	80	1	0	0
ESTNV_35278_946	C	80	1	0	0
ESTNV_32069_319	A	80	1	0	0
GCR_cBin31757_Ctg1_238	A	26	0.325	0.00235937	0.0485734
GCR_cBin31757_Ctg1_238	C	54	0.675	0.00235937	0.0485734
ESTNV_34322_888	A	39	0.4875	0.00296484	0.0544504
ESTNV_34322_888	T	41	0.5125	0.00296484	0.0544504
ESTNV_13218_450	A	15	0.1875	0.00146484	0.0382733
ESTNV_13218_450	G	65	0.8125	0.00146484	0.0382733
ESTV_19854_114	A	13	0.1625	0.00168359	0.0410316
ESTV_19854_114	C	67	0.8375	0.00168359	0.0410316
GCR_cBin40971_Ctg1_99	A	55	0.6875	0.00271484	0.0521042
GCR_cBin40971_Ctg1_99	C	25	0.3125	0.00271484	0.0521042
ESTNV_35964_989	C	80	1	0	0
GCR_cBin18615_Ctg1_159	A	78	0.975	0.000296875	0.0172301
GCR_cBin18615_Ctg1_159	C	2	0.025	0.000296875	0.0172301
ESTNV_33535_713	A	7	0.0875	0.00121484	0.0348546
ESTNV_33535_713	C	73	0.9125	0.00121484	0.0348546
GCR_cBin48650_Ctg1_186	A	22	0.275	0.00248438	0.0498435
GCR_cBin48650_Ctg1_186	G	58	0.725	0.00248438	0.0498435
ESTNV_36924_232	A	7	0.0875	0.00121484	0.0348546
ESTNV_36924_232	C	73	0.9125	0.00121484	0.0348546
ESTNV_36384_1752	A	70	0.875	0.00148438	0.0385276
ESTNV_36384_1752	G	10	0.125	0.00148438	0.0385276
ESTNV_35253_493	G	80	1	0	0
ESTNV_33535_853	A	7	0.0875	0.00121484	0.0348546
ESTNV_33535_853	G	73	0.9125	0.00121484	0.0348546
GCR_cBin45827_Ctg1_60	C	80	1	0	0
ESTV_15080_392	A	67	0.8375	0.00168359	0.0410316
ESTV_15080_392	G	13	0.1625	0.00168359	0.0410316
GCR_cBin44622_Ctg1_29	A	62	0.775	0.00154688	0.0393303
GCR_cBin44622_Ctg1_29	G	18	0.225	0.00154688	0.0393303
GCR_cBin46385_Ctg1_67	G	80	1	0	0
GCR_cBin572_Ctg1_59	A	79	0.9875	0.000152344	0.0123428
GCR_cBin572_Ctg1_59	C	1	0.0125	0.000152344	0.0123428
ESTNV_28108_776	A	7	0.0875	0.000902344	0.030039
ESTNV_28108_776	C	73	0.9125	0.000902344	0.030039
ESTNV_35762_168	A	66	0.825	0.00142187	0.0377078
ESTNV_35762_168	C	14	0.175	0.00142187	0.0377078
GCR_cBin46046_Ctg1_198	A	67	0.8375	0.00137109	0.0370283
GCR_cBin46046_Ctg1_198	C	13	0.1625	0.00137109	0.0370283
GCR_cBin33614_Ctg1_90	A	9	0.1125	0.00108984	0.0330128
GCR_cBin33614_Ctg1_90	G	71	0.8875	0.00108984	0.0330128
GCR_cBin17465_Ctg1_129	C	30	0.375	0.00273437	0.0522913
GCR_cBin17465_Ctg1_129	G	50	0.625	0.00273437	0.0522913
ESTNV_30075_59	A	20	0.25	0.0025	0.05
ESTNV_30075_59	C	60	0.75	0.0025	0.05
ESTV_21602_820	A	80	1	0	0
GCR_cBin43822_Ctg1_97	A	80	1	0	0
ESTNV_32753_1727	G	80	1	0	0
GCR_cBin45576_Ctg1_50	A	61	0.7625	0.00218359	0.0467289
GCR_cBin45576_Ctg1_50	G	19	0.2375	0.00218359	0.0467289
GCR_cBin1952_Ctg1_280	A	5	0.0625	0.000683594	0.0261456
GCR_cBin1952_Ctg1_280	G	75	0.9375	0.000683594	0.0261456
GCR_cBin38681_Ctg1_218	A	19	0.2375	0.00249609	0.0499609
GCR_cBin38681_Ctg1_218	C	61	0.7625	0.00249609	0.0499609
GCR_cBin6340_Ctg1_59	A	46	0.575	0.00298438	0.0546294
GCR_cBin6340_Ctg1_59	C	34	0.425	0.00298438	0.0546294
GCR_cBin11187_Ctg1_62	A	37	0.4625	0.00293359	0.0541627
GCR_cBin11187_Ctg1_62	G	43	0.5375	0.00293359	0.0541627
GCR_cBin7014_Ctg1_132	A	43	0.5375	0.00293359	0.0541627
GCR_cBin7014_Ctg1_132	G	37	0.4625	0.00293359	0.0541627
GCR_rBin10118_Ctg1_34	A	17	0.2125	0.00215234	0.0463934
GCR_rBin10118_Ctg1_34	G	63	0.7875	0.00215234	0.0463934
ESTNV_34021_1870	A	13	0.1625	0.00168359	0.0410316
ESTNV_34021_1870	G	67	0.8375	0.00168359	0.0410316
ESTNV_32103_191	C	80	1	0	0
GCR_cBin42179_Ctg1_389	C	80	1	0	0
GCR_cBin43281_Ctg1_51	A	11	0.1375	0.00187109	0.0432561
GCR_cBin43281_Ctg1_51	G	69	0.8625	0.00187109	0.0432561
GCR_cBin52844_Ctg1_180	A	4	0.05	0.000875	0.0295804
GCR_cBin52844_Ctg1_180	G	76	0.95	0.000875	0.0295804
GCR_cBin42179_Ctg1_350	A	13	0.1625	0.00168359	0.0410316
GCR_cBin42179_Ctg1_350	G	67	0.8375	0.00168359	0.0410316
GCR_cBin37910_Ctg1_93	A	38	0.475	0.00373437	0.0611095
GCR_cBin37910_Ctg1_93	G	42	0.525	0.00373437	0.0611095
GCR_cBin30294_Ctg1_36	C	1	0.0125	0.000152344	0.0123428
GCR_cBin30294_Ctg1_36	G	79	0.9875	0.000152344	0.0123428
ESTNV_28987_832	A	48	0.6	0.0031875	0.0564579
ESTNV_28987_832	C	32	0.4	0.0031875	0.0564579
GCR_cBin38428_Ctg1_72	A	74	0.925	0.000796875	0.028229
GCR_cBin38428_Ctg1_72	C	6	0.075	0.000796875	0.028229
GCR_cBin30905_Ctg1_38	A	3	0.0375	0.000433594	0.0208229
GCR_cBin30905_Ctg1_38	C	77	0.9625	0.000433594	0.0208229
ESTNV_30484_927	A	49	0.6125	0.00327734	0.0572481
ESTNV_30484_927	C	31	0.3875	0.00327734	0.0572481
GCR_cBin28586_Ctg1_147	A	29	0.3625	0.00312109	0.0558667
GCR_cBin28586_Ctg1_147	G	51	0.6375	0.00312109	0.0558667
ESTNV_33760_518	C	80	1	0	0
GCR_cBin17730_Ctg1_232	A	79	0.9875	0.000152344	0.0123428
GCR_cBin17730_Ctg1_232	C	1	0.0125	0.000152344	0.0123428
GCR_cBin23510_Ctg1_150	A	79	0.9875	0.000152344	0.0123428
GCR_cBin23510_Ctg1_150	G	1	0.0125	0.000152344	0.0123428
GCR_cBin43132_Ctg1_139	A	79	0.9875	0.000152344	0.0123428
GCR_cBin43132_Ctg1_139	G	1	0.0125	0.000152344	0.0123428
ESTNV_33875_378	C	2	0.025	0.000296875	0.0172301
ESTNV_33875_378	G	78	0.975	0.000296875	0.0172301
ESTNV_35486_240	G	80	1	0	0
ESTNV_35163_1993	T	80	1	0	0
ESTNV_35486_738	A	60	0.75	0.0028125	0.053033
ESTNV_35486_738	C	20	0.25	0.0028125	0.053033
GCR_cBin12492_Ctg1_178	A	37	0.474359	0.00327045	0.0571879
GCR_cBin12492_Ctg1_178	G	41	0.525641	0.00327045	0.0571879
ESTNV_35486_385	C	53	0.6625	0.00324609	0.0569745
ESTNV_35486_385	G	27	0.3375	0.00324609	0.0569745
GCR_hBin7576_Ctg1_138	A	18	0.225	0.00279687	0.0528855
GCR_hBin7576_Ctg1_138	G	62	0.775	0.00279687	0.0528855
GCR_cBin12492_Ctg1_183	A	38	0.475	0.00310938	0.0557618
GCR_cBin12492_Ctg1_183	G	42	0.525	0.00310938	0.0557618
ESTNV_26437_1349	A	66	0.825	0.00173438	0.0416458
ESTNV_26437_1349	G	14	0.175	0.00173438	0.0416458
GCR_cBin10658_Ctg1_107	C	20	0.25	0.0025	0.05
GCR_cBin10658_Ctg1_107	G	60	0.75	0.0025	0.05
GCR_cBin33592_Ctg1_241	A	75	0.9375	0.000683594	0.0261456
GCR_cBin33592_Ctg1_241	G	5	0.0625	0.000683594	0.0261456
ESTNV_33888_314	G	80	1	0	0
GCR_cBin10390_Ctg1_228	A	66	0.825	0.00173438	0.0416458
GCR_cBin10390_Ctg1_228	C	14	0.175	0.00173438	0.0416458
ESTV_12221_170	A	20	0.25	0.0025	0.05
ESTV_12221_170	G	60	0.75	0.0025	0.05
GCR_cBin26140_Ctg1_118	A	13	0.1625	0.00137109	0.0370283
GCR_cBin26140_Ctg1_118	G	67	0.8375	0.00137109	0.0370283
GCR_cBin1019_Ctg1_221	A	49	0.6125	0.00265234	0.0515009
GCR_cBin1019_Ctg1_221	G	31	0.3875	0.00265234	0.0515009
GCR_cBin26140_Ctg1_33	A	67	0.8375	0.00137109	0.0370283
GCR_cBin26140_Ctg1_33	T	13	0.1625	0.00137109	0.0370283
ESTNV_27182_609	A	12	0.15	0.001625	0.0403113
ESTNV_27182_609	G	68	0.85	0.001625	0.0403113
GCR_cBin27812_Ctg1_148	A	80	1	0	0
GCR_cBin26855_Ctg1_110	A	20	0.25	0.001875	0.0433013
GCR_cBin26855_Ctg1_110	C	60	0.75	0.001875	0.0433013
GCR_cBin39664_Ctg1_85	A	45	0.5625	0.00287109	0.0535826
GCR_cBin39664_Ctg1_85	G	35	0.4375	0.00287109	0.0535826
GCR_cBin38208_Ctg1_21	A	50	0.625	0.00304688	0.0551985
GCR_cBin38208_Ctg1_21	T	30	0.375	0.00304688	0.0551985
ESTV_15118_153	A	2	0.025	0.000296875	0.0172301
ESTV_15118_153	G	78	0.975	0.000296875	0.0172301
GCR_cBin47268_Ctg1_70	G	80	1	0	0
GCR_cBin47268_Ctg1_73	A	77	0.9625	0.000433594	0.0208229
GCR_cBin47268_Ctg1_73	G	3	0.0375	0.000433594	0.0208229
ESTNV_34296_693	A	66	0.825	0.00142187	0.0377078
ESTNV_34296_693	T	14	0.175	0.00142187	0.0377078
GCR_cBin18023_Ctg1_41	C	56	0.7	0.00275	0.0524404
GCR_cBin18023_Ctg1_41	G	24	0.3	0.00275	0.0524404
ESTNV_36480_1354	A	23	0.2875	0.00183984	0.0428934
ESTNV_36480_1354	T	57	0.7125	0.00183984	0.0428934
GCR_cBin34894_Ctg1_621	A	2	0.025	0.000296875	0.0172301
GCR_cBin34894_Ctg1_621	G	78	0.975	0.000296875	0.0172301
GCR_cBin26436_Ctg1_42	A	22	0.275	0.00279687	0.0528855
GCR_cBin26436_Ctg1_42	G	58	0.725	0.00279687	0.0528855
GCR_cBin24398_Ctg1_117	A	44	0.55	0.0030625	0.0553399
GCR_cBin24398_Ctg1_117	G	36	0.45	0.0030625	0.0553399
GCR_cBin3706_Ctg1_364	A	44	0.55	0.0030625	0.0553399
GCR_cBin3706_Ctg1_364	G	36	0.45	0.0030625	0.0553399
GCR_cBin23307_Ctg1_194	C	80	1	0	0
GCR_cBin12132_Ctg1_186	G	80	1	0	0
GCR_cBin5178_Ctg1_86	G	78	1	0	0
GCR_cBin12749_Ctg1_233	A	76	0.95	0.0005625	0.0237171
GCR_cBin12749_Ctg1_233	G	4	0.05	0.0005625	0.0237171
GCR_cBin45817_Ctg1_71	A	1	0.0125	0.000152344	0.0123428
GCR_cBin45817_Ctg1_71	G	79	0.9875	0.000152344	0.0123428
ESTNV_26350_156	C	47	0.5875	0.00308984	0.0555864
ESTNV_26350_156	G	33	0.4125	0.00308984	0.0555864
ESTNV_21694_208	A	1	0.0125	0.000152344	0.0123428
ESTNV_21694_208	G	79	0.9875	0.000152344	0.0123428
ESTNV_29851_266	A	69	0.8625	0.00124609	0.0353001
ESTNV_29851_266	G	11	0.1375	0.00124609	0.0353001
GCR_cBin19407_Ctg1_54	A	65	0.8125	0.00146484	0.0382733
GCR_cBin19407_Ctg1_54	G	15	0.1875	0.00146484	0.0382733
GCR_cBin12450_Ctg1_432	C	80	1	0	0
ESTV_14230_80	A	14	0.175	0.00142187	0.0377078
ESTV_14230_80	C	66	0.825	0.00142187	0.0377078
GCR_cBin5917_Ctg1_208	A	77	0.9625	0.000433594	0.0208229
GCR_cBin5917_Ctg1_208	G	3	0.0375	0.000433594	0.0208229
GCR_cBin1185_Ctg1_145	A	19	0.2375	0.00187109	0.0432561
GCR_cBin1185_Ctg1_145	G	61	0.7625	0.00187109	0.0432561
GCR_hBin21729_Ctg1_51	A	80	1	0	0
GCR_cBin37146_Ctg1_312	C	9	0.1125	0.00108984	0.0330128
GCR_cBin37146_Ctg1_312	G	71	0.8875	0.00108984	0.0330128
GCR_cBin5718_Ctg1_42	A	70	0.875	0.00148438	0.0385276
GCR_cBin5718_Ctg1_42	G	10	0.125	0.00148438	0.0385276
GCR_cBin32973_Ctg1_81	A	80	1	0	0
GCR_cBin32973_Ctg1_29	A	75	0.9375	0.000683594	0.0261456
GCR_cBin32973_Ctg1_29	G	5	0.0625	0.000683594	0.0261456
ESTNV_22623_238	A	2	0.025	0.000296875	0.0172301
ESTNV_22623_238	G	78	0.975	0.000296875	0.0172301
GCR_cBin35013_Ctg1_144	A	63	0.851351	0.0017768	0.042152
GCR_cBin35013_Ctg1_144	G	11	0.148649	0.0017768	0.042152
ESTNV_33390_1703	A	4	0.05	0.0005625	0.0237171
ESTNV_33390_1703	G	76	0.95	0.0005625	0.0237171
GCR_cBin28945_Ctg1_147	A	13	0.1625	0.00168359	0.0410316
GCR_cBin28945_Ctg1_147	G	67	0.8375	0.00168359	0.0410316
ESTNV_35898_1062	A	14	0.175	0.00173438	0.0416458
ESTNV_35898_1062	G	66	0.825	0.00173438	0.0416458
GCR_cBin26038_Ctg1_203	A	75	0.9375	0.000683594	0.0261456
GCR_cBin26038_Ctg1_203	G	5	0.0625	0.000683594	0.0261456
GCR_cBin5440_Ctg1_39	A	73	0.9125	0.00152734	0.0390812
GCR_cBin5440_Ctg1_39	T	7	0.0875	0.00152734	0.0390812
GCR_cBin32127_Ctg1_234	A	24	0.3	0.00275	0.0524404
GCR_cBin32127_Ctg1_234	G	56	0.7	0.00275	0.0524404
GCR_hBin19696_Ctg1_47	A	24	0.3	0.00275	0.0524404
GCR_hBin19696_Ctg1_47	G	56	0.7	0.00275	0.0524404
GCR_cBin32127_Ctg1_245	A	56	0.7	0.00275	0.0524404
GCR_cBin32127_Ctg1_245	C	24	0.3	0.00275	0.0524404
ESTNV_27431_454	A	43	0.5375	0.00324609	0.0569745
ESTNV_27431_454	G	37	0.4625	0.00324609	0.0569745
BASS14_B7_A02_640	A	75	0.9375	0.000683594	0.0261456
BASS14_B7_A02_640	C	5	0.0625	0.000683594	0.0261456
GCR_cBin41946_Ctg1_167	A	60	0.75	0.0025	0.05
GCR_cBin41946_Ctg1_167	G	20	0.25	0.0025	0.05
GCR_cBin41946_Ctg1_89	C	60	0.75	0.0025	0.05
GCR_cBin41946_Ctg1_89	G	20	0.25	0.0025	0.05
ESTNV_16068_255	C	28	0.35	0.002875	0.053619
ESTNV_16068_255	G	52	0.65	0.002875	0.053619
GCR_cBin49053_Ctg1_111	A	1	0.0125	0.000152344	0.0123428
GCR_cBin49053_Ctg1_111	G	79	0.9875	0.000152344	0.0123428
ESTNV_35810_833	A	30	0.375	0.00304688	0.0551985
ESTNV_35810_833	C	50	0.625	0.00304688	0.0551985
GCR_hBin18139_Ctg1_60	A	67	0.8375	0.00168359	0.0410316
GCR_hBin18139_Ctg1_60	C	13	0.1625	0.00168359	0.0410316
GCR_hBin18139_Ctg1_230	A	67	0.8375	0.00168359	0.0410316
GCR_hBin18139_Ctg1_230	G	13	0.1625	0.00168359	0.0410316
ESTNV_35810_643	A	8	0.1	0.001	0.0316228
ESTNV_35810_643	C	72	0.9	0.001	0.0316228
ESTNV_17527_71	C	8	0.1	0.001	0.0316228
ESTNV_17527_71	G	72	0.9	0.001	0.0316228
ESTNV_28091_630	A	79	0.9875	0.000152344	0.0123428
ESTNV_28091_630	G	1	0.0125	0.000152344	0.0123428
ESTNV_25175_634	A	13	0.1625	0.00199609	0.0446777
ESTNV_25175_634	T	67	0.8375	0.00199609	0.0446777
GCR_cBin25193_Ctg1_80	A	12	0.15	0.001625	0.0403113
GCR_cBin25193_Ctg1_80	G	68	0.85	0.001625	0.0403113
ESTNV_27318_155	A	80	1	0	0
GCR_cBin1418_Ctg1_135	A	1	0.0125	0.000152344	0.0123428
GCR_cBin1418_Ctg1_135	C	79	0.9875	0.000152344	0.0123428
ESTNV_31116_191	A	68	0.85	0.00225	0.0474342
ESTNV_31116_191	T	12	0.15	0.00225	0.0474342
ESTNV_25321_192	A	43	0.5375	0.00230859	0.0480478
ESTNV_25321_192	G	37	0.4625	0.00230859	0.0480478
ESTNV_29115_481	A	55	0.6875	0.00333984	0.0577914
ESTNV_29115_481	C	25	0.3125	0.00333984	0.0577914
GCR_cBin19598_Ctg1_176	A	51	0.6375	0.00312109	0.0558667
GCR_cBin19598_Ctg1_176	G	29	0.3625	0.00312109	0.0558667
ESTNV_31863_1602	T	80	1	0	0
GCR_cBin545_Ctg1_206	A	53	0.6625	0.00262109	0.0511966
GCR_cBin545_Ctg1_206	C	27	0.3375	0.00262109	0.0511966
BASS11_B7_G05_472	A	32	0.4	0.00225	0.0474342
BASS11_B7_G05_472	C	48	0.6	0.00225	0.0474342
GCR_cBin17574_Ctg1_128	A	13	0.1625	0.00137109	0.0370283
GCR_cBin17574_Ctg1_128	C	67	0.8375	0.00137109	0.0370283
BASS11_B7_G05_384	A	25	0.3125	0.00240234	0.0490137
BASS11_B7_G05_384	C	55	0.6875	0.00240234	0.0490137
BASS11_B7_G05_691	A	32	0.4	0.00225	0.0474342
BASS11_B7_G05_691	C	48	0.6	0.00225	0.0474342
ESTNV_23544_330	A	8	0.1	0.001	0.0316228
ESTNV_23544_330	C	72	0.9	0.001	0.0316228
BASS117_B7_E04_685	A	33	0.4125	0.00277734	0.0527005
BASS117_B7_E04_685	G	47	0.5875	0.00277734	0.0527005
BASS117_B7_E04_554	A	47	0.5875	0.00277734	0.0527005
BASS117_B7_E04_554	G	33	0.4125	0.00277734	0.0527005
GCR_cBin50585_Ctg1_139	C	23	0.2875	0.00215234	0.0463934
GCR_cBin50585_Ctg1_139	G	57	0.7125	0.00215234	0.0463934
GCR_cBin37317_Ctg1_131	C	60	0.75	0.0025	0.05
GCR_cBin37317_Ctg1_131	G	20	0.25	0.0025	0.05
ESTNV_33213_337	A	44	0.55	0.0030625	0.0553399
ESTNV_33213_337	T	36	0.45	0.0030625	0.0553399
GCR_hBin35252_Ctg1_84	A	64	0.8	0.0015	0.0387298
GCR_hBin35252_Ctg1_84	G	16	0.2	0.0015	0.0387298
GCR_cBin6519_Ctg1_383	C	46	0.575	0.00267188	0.0516902
GCR_cBin6519_Ctg1_383	G	34	0.425	0.00267188	0.0516902
GCR_cBin6519_Ctg1_116	A	46	0.575	0.00267188	0.0516902
GCR_cBin6519_Ctg1_116	T	34	0.425	0.00267188	0.0516902
GCR_cBin16390_Ctg1_172	A	43	0.5375	0.00324609	0.0569745
GCR_cBin16390_Ctg1_172	C	37	0.4625	0.00324609	0.0569745
ESTNV_30332_660	G	80	1	0	0
GCR_cBin37317_Ctg1_184	A	41	0.5125	0.00296484	0.0544504
GCR_cBin37317_Ctg1_184	G	39	0.4875	0.00296484	0.0544504
GCR_cBin16390_Ctg1_190	A	37	0.4625	0.00324609	0.0569745
GCR_cBin16390_Ctg1_190	C	43	0.5375	0.00324609	0.0569745
ESTNV_34569_1252	C	80	1	0	0
ESTV_14468_119	G	80	1	0	0
ESTV_18722_351	A	76	0.95	0.0005625	0.0237171
ESTV_18722_351	G	4	0.05	0.0005625	0.0237171
ESTNV_36348_720	A	5	0.0625	0.000683594	0.0261456
ESTNV_36348_720	C	75	0.9375	0.000683594	0.0261456
ESTNV_28229_1264	A	79	0.9875	0.000152344	0.0123428
ESTNV_28229_1264	G	1	0.0125	0.000152344	0.0123428
ESTNV_34569_753	C	80	1	0	0
ESTNV_33934_55	A	29	0.3625	0.00218359	0.0467289
ESTNV_33934_55	C	51	0.6375	0.00218359	0.0467289
BASS115_B6A_H02_496	A	12	0.15	0.001625	0.0403113
BASS115_B6A_H02_496	C	68	0.85	0.001625	0.0403113
GCR_cBin15671_Ctg1_125	A	35	0.4375	0.00349609	0.0591278
GCR_cBin15671_Ctg1_125	T	45	0.5625	0.00349609	0.0591278
GCR_cBin48621_Ctg1_143	A	2	0.025	0.000296875	0.0172301
GCR_cBin48621_Ctg1_143	C	78	0.975	0.000296875	0.0172301
ESTNV_36486_673	C	77	0.9625	0.000433594	0.0208229
ESTNV_36486_673	G	3	0.0375	0.000433594	0.0208229
GCR_cBin26183_Ctg1_163	A	23	0.2875	0.00246484	0.0496472
GCR_cBin26183_Ctg1_163	G	57	0.7125	0.00246484	0.0496472
GCR_cBin48621_Ctg1_146	A	78	0.975	0.000296875	0.0172301
GCR_cBin48621_Ctg1_146	G	2	0.025	0.000296875	0.0172301
ESTNV_31699_1208	A	47	0.5875	0.00308984	0.0555864
ESTNV_31699_1208	C	33	0.4125	0.00308984	0.0555864
ESTNV_36170_1803	A	1	0.0125	0.000152344	0.0123428
ESTNV_36170_1803	G	79	0.9875	0.000152344	0.0123428
ESTNV_26803_666	A	5	0.0625	0.000683594	0.0261456
ESTNV_26803_666	G	75	0.9375	0.000683594	0.0261456
GCR_cBin24983_Ctg1_211	A	63	0.7875	0.00183984	0.0428934
GCR_cBin24983_Ctg1_211	C	17	0.2125	0.00183984	0.0428934
GCR_cBin33457_Ctg1_198	A	68	0.85	0.0013125	0.0362284
GCR_cBin33457_Ctg1_198	C	12	0.15	0.0013125	0.0362284
GCR_cBin38774_Ctg1_204	C	8	0.1	0.001	0.0316228
GCR_cBin38774_Ctg1_204	G	72	0.9	0.001	0.0316228
ESTNV_36426_226	A	79	0.9875	0.000152344	0.0123428
ESTNV_36426_226	G	1	0.0125	0.000152344	0.0123428
GCR_cBin33503_Ctg1_290	A	6	0.075	0.000796875	0.028229
GCR_cBin33503_Ctg1_290	G	74	0.925	0.000796875	0.028229
ESTV_15074_164	A	17	0.2125	0.00183984	0.0428934
ESTV_15074_164	G	63	0.7875	0.00183984	0.0428934
ESTNV_36002_1472	A	5	0.0625	0.000683594	0.0261456
ESTNV_36002_1472	G	75	0.9375	0.000683594	0.0261456
ESTNV_15285_387	C	50	0.625	0.00335937	0.0579601
ESTNV_15285_387	G	30	0.375	0.00335937	0.0579601
GCR_cBin27216_Ctg1_405	A	7	0.0875	0.000902344	0.030039
GCR_cBin27216_Ctg1_405	G	73	0.9125	0.000902344	0.030039
GCR_cBin8947_Ctg1_161	A	21	0.2625	0.00280859	0.0529962
GCR_cBin8947_Ctg1_161	G	59	0.7375	0.00280859	0.0529962
GCR_cBin33503_Ctg1_345	A	38	0.475	0.00279687	0.0528855
GCR_cBin33503_Ctg1_345	G	42	0.525	0.00279687	0.0528855
GCR_cBin48593_Ctg1_152	A	2	0.025	0.000296875	0.0172301
GCR_cBin48593_Ctg1_152	C	78	0.975	0.000296875	0.0172301
GCR_cBin47309_Ctg1_158	C	28	0.35	0.0025625	0.0506211
GCR_cBin47309_Ctg1_158	G	52	0.65	0.0025625	0.0506211
GCR_hBin21216_Ctg1_199	A	41	0.5125	0.00202734	0.045026
GCR_hBin21216_Ctg1_199	C	39	0.4875	0.00202734	0.045026
GCR_cBin31719_Ctg1_177	A	67	0.8375	0.00137109	0.0370283
GCR_cBin31719_Ctg1_177	C	13	0.1625	0.00137109	0.0370283
GCR_cBin19824_Ctg1_145	A	26	0.325	0.00235937	0.0485734
GCR_cBin19824_Ctg1_145	G	54	0.675	0.00235937	0.0485734
ESTNV_25685_546	A	15	0.1875	0.00146484	0.0382733
ESTNV_25685_546	G	65	0.8125	0.00146484	0.0382733
ESTNV_33470_753	A	54	0.675	0.00235937	0.0485734
ESTNV_33470_753	G	26	0.325	0.00235937	0.0485734
ESTNV_27944_196	A	80	1	0	0
ESTNV_36724_118	G	80	1	0	0
ESTNV_35192_247	A	3	0.0375	0.000433594	0.0208229
ESTNV_35192_247	T	77	0.9625	0.000433594	0.0208229
BASS114_B6A_B06_105	A	59	0.7375	0.00280859	0.0529962
BASS114_B6A_B06_105	C	21	0.2625	0.00280859	0.0529962
ESTNV_35192_126	A	49	0.6125	0.00265234	0.0515009
ESTNV_35192_126	C	31	0.3875	0.00265234	0.0515009
GCR_cBin25759_Ctg1_44	C	12	0.15	0.001625	0.0403113
GCR_cBin25759_Ctg1_44	G	68	0.85	0.001625	0.0403113
GCR_cBin29181_Ctg1_51	A	52	0.65	0.0019375	0.044017
GCR_cBin29181_Ctg1_51	T	28	0.35	0.0019375	0.044017
ESTV_17694_278	A	6	0.075	0.000796875	0.028229
ESTV_17694_278	G	74	0.925	0.000796875	0.028229
GCR_cBin698_Ctg1_258	A	45	0.5625	0.00380859	0.0617138
GCR_cBin698_Ctg1_258	T	35	0.4375	0.00380859	0.0617138
GCR_cBin698_Ctg1_256	A	35	0.4375	0.00380859	0.0617138
GCR_cBin698_Ctg1_256	T	45	0.5625	0.00380859	0.0617138
GCR_cBin698_Ctg1_215	A	45	0.5625	0.00380859	0.0617138
GCR_cBin698_Ctg1_215	G	35	0.4375	0.00380859	0.0617138
GCR_cBin698_Ctg1_125	A	80	1	0	0
ESTNV_34783_687	A	6	0.075	0.00110937	0.0333073
ESTNV_34783_687	G	74	0.925	0.00110937	0.0333073
GCR_cBin705_Ctg1_218	A	66	0.825	0.00173438	0.0416458
GCR_cBin705_Ctg1_218	G	14	0.175	0.00173438	0.0416458
GCR_cBin705_Ctg1_366	A	14	0.175	0.00173438	0.0416458
GCR_cBin705_Ctg1_366	G	66	0.825	0.00173438	0.0416458
GCR_cBin705_Ctg1_123	A	14	0.175	0.00173438	0.0416458
GCR_cBin705_Ctg1_123	G	66	0.825	0.00173438	0.0416458
GCR_cBin19367_Ctg1_143	A	73	0.9125	0.000902344	0.030039
GCR_cBin19367_Ctg1_143	G	7	0.0875	0.000902344	0.030039
ESTV_15107_389	A	76	0.95	0.000875	0.0295804
ESTV_15107_389	G	4	0.05	0.000875	0.0295804
ESTNV_36706_574	A	5	0.0625	0.000996094	0.031561
ESTNV_36706_574	C	75	0.9375	0.000996094	0.031561
ESTNV_27242_211	C	6	0.075	0.000796875	0.028229
ESTNV_27242_211	G	74	0.925	0.000796875	0.028229
ESTV_20675_499	A	52	0.65	0.002875	0.053619
ESTV_20675_499	G	28	0.35	0.002875	0.053619
GCR_cBin8347_Ctg1_155	A	76	0.95	0.0005625	0.0237171
GCR_cBin8347_Ctg1_155	T	4	0.05	0.0005625	0.0237171
GCR_hBin46188_Ctg1_237	T	80	1	0	0
GCR_cBin28712_Ctg1_124	A	1	0.0125	0.000152344	0.0123428
GCR_cBin28712_Ctg1_124	C	79	0.9875	0.000152344	0.0123428
GCR_hBin44277_Ctg1_106	A	80	1	0	0
ESTNV_36490_690	A	10	0.125	0.00117187	0.0342327
ESTNV_36490_690	C	70	0.875	0.00117187	0.0342327
ESTV_21365_54	A	80	1	0	0
ESTNV_30166_762	C	80	1	0	0
ESTNV_26125_188	A	5	0.0625	0.000683594	0.0261456
ESTNV_26125_188	C	75	0.9375	0.000683594	0.0261456
ESTNV_35823_463	C	80	1	0	0
GCR_cBin42387_Ctg1_56	A	75	0.9375	0.000996094	0.031561
GCR_cBin42387_Ctg1_56	G	5	0.0625	0.000996094	0.031561
ESTNV_36853_78	C	4	0.05	0.000875	0.0295804
ESTNV_36853_78	G	76	0.95	0.000875	0.0295804
ESTNV_27947_584	A	76	0.95	0.000875	0.0295804
ESTNV_27947_584	T	4	0.05	0.000875	0.0295804
ESTNV_34937_1396	A	6	0.075	0.000796875	0.028229
ESTNV_34937_1396	C	74	0.925	0.000796875	0.028229
GCR_cBin21639_Ctg1_129	A	4	0.05	0.0005625	0.0237171
GCR_cBin21639_Ctg1_129	G	76	0.95	0.0005625	0.0237171
GCR_cBin13830_Ctg1_156	A	34	0.425	0.00392188	0.0626249
GCR_cBin13830_Ctg1_156	G	46	0.575	0.00392188	0.0626249
GCR_cBin9325_Ctg1_629	C	31	0.397436	0.00367505	0.0606222
GCR_cBin9325_Ctg1_629	G	47	0.602564	0.00367505	0.0606222
ESTNV_28515_410	C	33	0.4125	0.00277734	0.0527005
ESTNV_28515_410	G	47	0.5875	0.00277734	0.0527005
ESTNV_26964_711	A	40	0.5	0.0034375	0.0586302
ESTNV_26964_711	G	40	0.5	0.0034375	0.0586302
GCR_cBin40533_Ctg1_184	A	55	0.6875	0.00396484	0.062967
GCR_cBin40533_Ctg1_184	G	25	0.3125	0.00396484	0.062967
ESTNV_26964_592	A	40	0.5	0.0034375	0.0586302
ESTNV_26964_592	G	40	0.5	0.0034375	0.0586302
GCR_cBin35156_Ctg1_47	A	77	0.9625	0.000433594	0.0208229
GCR_cBin35156_Ctg1_47	G	3	0.0375	0.000433594	0.0208229
ESTNV_24363_306	A	26	0.325	0.00267188	0.0516902
ESTNV_24363_306	C	54	0.675	0.00267188	0.0516902
ESTNV_32353_1231	A	43	0.5375	0.00387109	0.0622181
ESTNV_32353_1231	C	37	0.4625	0.00387109	0.0622181
GCR_cBin9554_Ctg1_111	A	52	0.65	0.002875	0.053619
GCR_cBin9554_Ctg1_111	C	28	0.35	0.002875	0.053619
GCR_cBin23594_Ctg1_69	A	50	0.625	0.00335937	0.0579601
GCR_cBin23594_Ctg1_69	C	30	0.375	0.00335937	0.0579601
GCR_cBin7278_Ctg1_101	A	58	0.725	0.00248438	0.0498435
GCR_cBin7278_Ctg1_101	C	22	0.275	0.00248438	0.0498435
GCR_cBin7278_Ctg1_140	A	58	0.725	0.00248438	0.0498435
GCR_cBin7278_Ctg1_140	G	22	0.275	0.00248438	0.0498435
GCR_cBin42013_Ctg1_64	A	80	1	0	0
ESTNV_30341_1348	A	44	0.55	0.003375	0.0580948
ESTNV_30341_1348	T	36	0.45	0.003375	0.0580948
GCR_cBin17069_Ctg1_53	A	41	0.5125	0.00327734	0.0572481
GCR_cBin17069_Ctg1_53	G	39	0.4875	0.00327734	0.0572481
GCR_cBin630_Ctg1_411	A	5	0.0625	0.000996094	0.031561
GCR_cBin630_Ctg1_411	G	75	0.9375	0.000996094	0.031561
GCR_cBin43670_Ctg1_77	A	65	0.8125	0.00208984	0.0457148
GCR_cBin43670_Ctg1_77	G	15	0.1875	0.00208984	0.0457148
ESTV_15992_330	A	7	0.0875	0.000902344	0.030039
ESTV_15992_330	G	73	0.9125	0.000902344	0.030039
ESTNV_28270_603	A	80	1	0	0
ESTNV_35703_1395	A	3	0.0375	0.000433594	0.0208229
ESTNV_35703_1395	G	77	0.9625	0.000433594	0.0208229
ESTNV_24638_210	C	78	0.975	0.000296875	0.0172301
ESTNV_24638_210	G	2	0.025	0.000296875	0.0172301
ESTNV_36373_1935	A	75	0.9375	0.000683594	0.0261456
ESTNV_36373_1935	G	5	0.0625	0.000683594	0.0261456
ESTNV_27268_490	A	80	1	0	0
ESTNV_35486_1270	A	17	0.2125	0.00215234	0.0463934
ESTNV_35486_1270	G	63	0.7875	0.00215234	0.0463934
GCR_cBin36565_Ctg1_226	A	71	0.910256	0.00127278	0.035676
GCR_cBin36565_Ctg1_226	G	7	0.0897436	0.00127278	0.035676
GCR_cBin10083_Ctg1_32	A	75	0.986842	0.000168574	0.0129836
GCR_cBin10083_Ctg1_32	G	1	0.0131579	0.000168574	0.0129836
GCR_cBin21674_Ctg1_331	A	24	0.307692	0.00348961	0.0590729
GCR_cBin21674_Ctg1_331	T	54	0.692308	0.00348961	0.0590729
ESTV_13245_584	C	80	1	0	0
ESTNV_33113_353	A	80	1	0	0
GCR_hBin21729_Ctg1_168	G	80	1	0	0
GCR_hBin43280_Ctg1_61	C	80	1	0	0
ESTV_15739_295	G	80	1	0	0
ESTNV_34055_242	G	80	1	0	0
ESTV_16262_1716	A	59	0.7375	0.00249609	0.0499609
ESTV_16262_1716	G	21	0.2625	0.00249609	0.0499609
ESTNV_25199_261	A	38	0.475	0.00279687	0.0528855
ESTNV_25199_261	C	42	0.525	0.00279687	0.0528855
GCR_cBin17416_Ctg1_223	A	17	0.2125	0.00183984	0.0428934
GCR_cBin17416_Ctg1_223	C	63	0.7875	0.00183984	0.0428934
GCR_hBin17624_Ctg1_81	A	21	0.2625	0.00280859	0.0529962
GCR_hBin17624_Ctg1_81	C	59	0.7375	0.00280859	0.0529962
GCR_cBin19146_Ctg1_97	A	9	0.1125	0.00108984	0.0330128
GCR_cBin19146_Ctg1_97	G	71	0.8875	0.00108984	0.0330128
ESTV_17233_535	A	19	0.2375	0.00249609	0.0499609
ESTV_17233_535	G	61	0.7625	0.00249609	0.0499609
ESTNV_23531_462	C	80	1	0	0
ESTV_7881_334	A	17	0.2125	0.00152734	0.0390812
ESTV_7881_334	G	63	0.7875	0.00152734	0.0390812
GCR_cBin25027_Ctg1_137	A	78	0.975	0.000296875	0.0172301
GCR_cBin25027_Ctg1_137	G	2	0.025	0.000296875	0.0172301
GCR_cBin41451_Ctg1_172	A	59	0.7375	0.00187109	0.0432561
GCR_cBin41451_Ctg1_172	C	21	0.2625	0.00187109	0.0432561
ESTNV_32366_632	A	53	0.679487	0.00180381	0.0424712
ESTNV_32366_632	G	25	0.320513	0.00180381	0.0424712
ESTNV_29209_356	A	60	0.75	0.0025	0.05
ESTNV_29209_356	G	20	0.25	0.0025	0.05
ESTNV_36510_599	A	67	0.858974	0.00129807	0.0360287
ESTNV_36510_599	G	11	0.141026	0.00129807	0.0360287
ESTV_15688_494	A	69	0.8625	0.00124609	0.0353001
ESTV_15688_494	G	11	0.1375	0.00124609	0.0353001
ESTNV_30757_471	A	9	0.1125	0.00108984	0.0330128
ESTNV_30757_471	G	71	0.8875	0.00108984	0.0330128
GCR_cBin3256_Ctg1_63	A	45	0.5625	0.00287109	0.0535826
GCR_cBin3256_Ctg1_63	C	35	0.4375	0.00287109	0.0535826
GCR_cBin836_Ctg1_394	A	12	0.15	0.0013125	0.0362284
GCR_cBin836_Ctg1_394	C	68	0.85	0.0013125	0.0362284
ESTNV_35640_75	C	39	0.4875	0.00327734	0.0572481
ESTNV_35640_75	G	41	0.5125	0.00327734	0.0572481
GCR_cBin48467_Ctg1_35	A	14	0.175	0.00142187	0.0377078
GCR_cBin48467_Ctg1_35	C	66	0.825	0.00142187	0.0377078
ESTNV_23431_381	A	31	0.407895	0.00271997	0.0521533
ESTNV_23431_381	G	45	0.592105	0.00271997	0.0521533
ESTNV_37039_99	A	48	0.6	0.00225	0.0474342
ESTNV_37039_99	G	32	0.4	0.00225	0.0474342
GCR_cBin1859_Ctg1_276	G	80	1	0	0
GCR_cBin11134_Ctg1_164	A	62	0.775	0.00185937	0.0431205
GCR_cBin11134_Ctg1_164	G	18	0.225	0.00185937	0.0431205
GCR_cBin11134_Ctg1_43	A	62	0.775	0.00185937	0.0431205
GCR_cBin11134_Ctg1_43	G	18	0.225	0.00185937	0.0431205
GCR_cBin4983_Ctg1_416	A	80	1	0	0
GCR_cBin18961_Ctg1_75	C	70	0.875	0.00117187	0.0342327
GCR_cBin18961_Ctg1_75	G	10	0.125	0.00117187	0.0342327
ESTV_8181_51	A	45	0.5625	0.00318359	0.0564233
ESTV_8181_51	G	35	0.4375	0.00318359	0.0564233
ESTNV_26621_493	A	45	0.5625	0.00255859	0.0505825
ESTNV_26621_493	C	35	0.4375	0.00255859	0.0505825
ESTNV_23711_205	A	80	1	0	0
ESTV_17538_85	A	2	0.025	0.000296875	0.0172301
ESTV_17538_85	G	78	0.975	0.000296875	0.0172301
GCR_cBin2733_Ctg1_528	A	2	0.025	0.000296875	0.0172301
GCR_cBin2733_Ctg1_528	G	78	0.975	0.000296875	0.0172301
ESTNV_33243_1092	A	80	1	0	0
ESTNV_25889_239	A	52	0.65	0.0025625	0.0506211
ESTNV_25889_239	G	28	0.35	0.0025625	0.0506211
ESTNV_33243_235	A	52	0.65	0.0025625	0.0506211
ESTNV_33243_235	G	28	0.35	0.0025625	0.0506211
GCR_cBin32739_Ctg1_78	A	78	0.975	0.000296875	0.0172301
GCR_cBin32739_Ctg1_78	G	2	0.025	0.000296875	0.0172301
ESTNV_29403_553	A	67	0.8375	0.00199609	0.0446777
ESTNV_29403_553	G	13	0.1625	0.00199609	0.0446777
GCR_cBin25248_Ctg1_228	C	80	1	0	0
ESTNV_34987_849	A	36	0.45	0.00275	0.0524404
ESTNV_34987_849	C	44	0.55	0.00275	0.0524404
ESTNV_34987_996	A	36	0.45	0.00275	0.0524404
ESTNV_34987_996	G	44	0.55	0.00275	0.0524404
GCR_cBin6804_Ctg1_170	A	80	1	0	0
ESTNV_27342_254	A	28	0.378378	0.00306991	0.0554067
ESTNV_27342_254	G	46	0.621622	0.00306991	0.0554067
ESTV_16240_204	G	80	1	0	0
GCR_cBin29831_Ctg1_68	C	30	0.375	0.00304688	0.0551985
GCR_cBin29831_Ctg1_68	G	50	0.625	0.00304688	0.0551985
ESTNV_32051_1570	A	45	0.5625	0.00349609	0.0591278
ESTNV_32051_1570	G	35	0.4375	0.00349609	0.0591278
BASS13_B7_B07_761	A	13	0.1625	0.00137109	0.0370283
BASS13_B7_B07_761	G	67	0.8375	0.00137109	0.0370283
GCR_cBin28152_Ctg1_60	A	50	0.625	0.00273437	0.0522913
GCR_cBin28152_Ctg1_60	G	30	0.375	0.00273437	0.0522913
GCR_cBin28152_Ctg1_185	A	50	0.625	0.00273437	0.0522913
GCR_cBin28152_Ctg1_185	T	30	0.375	0.00273437	0.0522913
GCR_cBin14203_Ctg1_147	A	44	0.55	0.00275	0.0524404
GCR_cBin14203_Ctg1_147	C	36	0.45	0.00275	0.0524404
GCR_cBin15266_Ctg1_58	A	77	0.9625	0.000433594	0.0208229
GCR_cBin15266_Ctg1_58	G	3	0.0375	0.000433594	0.0208229
GCR_cBin6804_Ctg1_99	A	67	0.8375	0.00137109	0.0370283
GCR_cBin6804_Ctg1_99	G	13	0.1625	0.00137109	0.0370283
GCR_cBin24972_Ctg1_42	A	30	0.375	0.00273437	0.0522913
GCR_cBin24972_Ctg1_42	G	50	0.625	0.00273437	0.0522913
GCR_cBin31996_Ctg1_226	A	14	0.175	0.00204688	0.0452424
GCR_cBin31996_Ctg1_226	T	66	0.825	0.00204688	0.0452424
GCR_cBin31996_Ctg1_169	A	14	0.175	0.00204688	0.0452424
GCR_cBin31996_Ctg1_169	G	66	0.825	0.00204688	0.0452424
GCR_cBin34406_Ctg1_88	A	38	0.475	0.00279687	0.0528855
GCR_cBin34406_Ctg1_88	G	42	0.525	0.00279687	0.0528855
GCR_cBin43448_Ctg1_152	C	80	1	0	0
ESTNV_32001_1134	A	38	0.475	0.00248438	0.0498435
ESTNV_32001_1134	G	42	0.525	0.00248438	0.0498435
GCR_hBin13605_Ctg1_93	A	66	0.825	0.00173438	0.0416458
GCR_hBin13605_Ctg1_93	C	14	0.175	0.00173438	0.0416458
GCR_cBin20942_Ctg1_68	A	53	0.6625	0.00199609	0.0446777
GCR_cBin20942_Ctg1_68	C	27	0.3375	0.00199609	0.0446777
GCR_cBin49210_Ctg1_198	G	80	1	0	0
GCR_cBin20942_Ctg1_63	A	27	0.3375	0.00199609	0.0446777
GCR_cBin20942_Ctg1_63	C	53	0.6625	0.00199609	0.0446777
GCR_cBin7112_Ctg1_397	A	71	0.8875	0.00140234	0.0374479
GCR_cBin7112_Ctg1_397	C	9	0.1125	0.00140234	0.0374479
GCR_cBin37669_Ctg1_32	A	45	0.5625	0.00380859	0.0617138
GCR_cBin37669_Ctg1_32	G	35	0.4375	0.00380859	0.0617138
ESTNV_34868_337	C	80	1	0	0
ESTNV_22661_681	A	1	0.0125	0.000152344	0.0123428
ESTNV_22661_681	G	79	0.9875	0.000152344	0.0123428
GCR_cBin27851_Ctg1_509	T	80	1	0	0
GCR_cBin27851_Ctg1_590	G	80	1	0	0
ESTNV_30354_106	A	78	0.975	0.000296875	0.0172301
ESTNV_30354_106	C	2	0.025	0.000296875	0.0172301
ESTNV_30411_506	A	3	0.0375	0.000433594	0.0208229
ESTNV_30411_506	C	77	0.9625	0.000433594	0.0208229
ESTNV_33967_1368	A	1	0.0125	0.000152344	0.0123428
ESTNV_33967_1368	G	79	0.9875	0.000152344	0.0123428
GCR_cBin38527_Ctg1_75	C	79	0.9875	0.000152344	0.0123428
GCR_cBin38527_Ctg1_75	G	1	0.0125	0.000152344	0.0123428
ESTNV_33967_1551	A	79	0.9875	0.000152344	0.0123428
ESTNV_33967_1551	G	1	0.0125	0.000152344	0.0123428
GCR_cBin3280_Ctg1_169	A	79	0.9875	0.000152344	0.0123428
GCR_cBin3280_Ctg1_169	C	1	0.0125	0.000152344	0.0123428
ESTV_15445_193	A	58	0.725	0.00248438	0.0498435
ESTV_15445_193	G	22	0.275	0.00248438	0.0498435
GCR_cBin3280_Ctg1_135	A	38	0.475	0.00342188	0.0584968
GCR_cBin3280_Ctg1_135	G	42	0.525	0.00342188	0.0584968
ESTV_12252_166	A	1	0.0125	0.000152344	0.0123428
ESTV_12252_166	G	79	0.9875	0.000152344	0.0123428
GCR_cBin37519_Ctg1_244	A	26	0.325	0.00298438	0.0546294
GCR_cBin37519_Ctg1_244	C	54	0.675	0.00298438	0.0546294
ESTNV_35410_1102	C	73	0.9125	0.00121484	0.0348546
ESTNV_35410_1102	G	7	0.0875	0.00121484	0.0348546
ESTNV_37136_732	A	9	0.1125	0.00140234	0.0374479
ESTNV_37136_732	G	71	0.8875	0.00140234	0.0374479
GCR_cBin8284_Ctg1_213	C	28	0.35	0.002875	0.053619
GCR_cBin8284_Ctg1_213	G	52	0.65	0.002875	0.053619
GCR_cBin5316_Ctg2_193	A	78	0.975	0.000296875	0.0172301
GCR_cBin5316_Ctg2_193	T	2	0.025	0.000296875	0.0172301
GCR_cBin45701_Ctg1_227	A	71	0.8875	0.00108984	0.0330128
GCR_cBin45701_Ctg1_227	G	9	0.1125	0.00108984	0.0330128
ESTNV_31893_467	A	65	0.8125	0.00240234	0.0490137
ESTNV_31893_467	G	15	0.1875	0.00240234	0.0490137
ESTNV_31893_226	A	80	1	0	0
GCR_cBin16365_Ctg1_475	A	24	0.3	0.0024375	0.049371
GCR_cBin16365_Ctg1_475	C	56	0.7	0.0024375	0.049371
ESTV_21702_136	A	63	0.7875	0.00215234	0.0463934
ESTV_21702_136	G	17	0.2125	0.00215234	0.0463934
ESTV_16902_235	A	54	0.675	0.00329687	0.0574184
ESTV_16902_235	C	26	0.325	0.00329687	0.0574184
ESTNV_36697_1478	A	33	0.4125	0.00308984	0.0555864
ESTNV_36697_1478	G	47	0.5875	0.00308984	0.0555864
GCR_cBin26271_Ctg1_32	A	74	0.925	0.000796875	0.028229
GCR_cBin26271_Ctg1_32	G	6	0.075	0.000796875	0.028229
ESTNV_33477_1310	A	5	0.0625	0.000683594	0.0261456
ESTNV_33477_1310	G	75	0.9375	0.000683594	0.0261456
GCR_cBin17329_Ctg2_166	A	79	0.9875	0.000152344	0.0123428
GCR_cBin17329_Ctg2_166	C	1	0.0125	0.000152344	0.0123428
GCR_hBin21648_Ctg1_137	A	79	0.9875	0.000152344	0.0123428
GCR_hBin21648_Ctg1_137	C	1	0.0125	0.000152344	0.0123428
ESTV_21377_436	A	64	0.8	0.002125	0.0460977
ESTV_21377_436	T	16	0.2	0.002125	0.0460977
GCR_cBin12401_Ctg1_186	A	68	0.85	0.0019375	0.044017
GCR_cBin12401_Ctg1_186	G	12	0.15	0.0019375	0.044017
GCR_cBin1955_Ctg1_60	A	6	0.075	0.000796875	0.028229
GCR_cBin1955_Ctg1_60	G	74	0.925	0.000796875	0.028229
GCR_cBin30689_Ctg1_25	A	2	0.025	0.000296875	0.0172301
GCR_cBin30689_Ctg1_25	T	78	0.975	0.000296875	0.0172301
ESTNV_36095_1044	A	61	0.7625	0.00187109	0.0432561
ESTNV_36095_1044	C	19	0.2375	0.00187109	0.0432561
GCR_cBin43112_Ctg1_86	A	56	0.7	0.0024375	0.049371
GCR_cBin43112_Ctg1_86	G	24	0.3	0.0024375	0.049371
ESTNV_36751_1595	A	46	0.575	0.00392188	0.0626249
ESTNV_36751_1595	G	34	0.425	0.00392188	0.0626249
GCR_cBin22374_Ctg1_508	A	62	0.775	0.00248438	0.0498435
GCR_cBin22374_Ctg1_508	G	18	0.225	0.00248438	0.0498435
ESTNV_19996_365	A	67	0.8375	0.00199609	0.0446777
ESTNV_19996_365	G	13	0.1625	0.00199609	0.0446777
ESTNV_36998_1021	A	77	0.9625	0.000433594	0.0208229
ESTNV_36998_1021	G	3	0.0375	0.000433594	0.0208229
ESTNV_36516_128	C	53	0.6625	0.00262109	0.0511966
ESTNV_36516_128	G	27	0.3375	0.00262109	0.0511966
GCR_cBin14440_Ctg1_49	A	79	0.9875	0.000152344	0.0123428
GCR_cBin14440_Ctg1_49	G	1	0.0125	0.000152344	0.0123428
GCR_cBin3627_Ctg1_142	C	76	0.974359	0.000311873	0.0176599
GCR_cBin3627_Ctg1_142	G	2	0.025641	0.000311873	0.0176599
BASS113_B7_G12_644	A	66	0.825	0.00142187	0.0377078
BASS113_B7_G12_644	G	14	0.175	0.00142187	0.0377078
ESTNV_32044_621	A	5	0.0625	0.000683594	0.0261456
ESTNV_32044_621	G	75	0.9375	0.000683594	0.0261456
GCR_cBin52996_Ctg1_137	A	10	0.125	0.00117187	0.0342327
GCR_cBin52996_Ctg1_137	G	70	0.875	0.00117187	0.0342327
GCR_cBin21125_Ctg1_53	A	4	0.05	0.0005625	0.0237171
GCR_cBin21125_Ctg1_53	C	76	0.95	0.0005625	0.0237171
GCR_cBin13800_Ctg1_159	A	36	0.45	0.003375	0.0580948
GCR_cBin13800_Ctg1_159	G	44	0.55	0.003375	0.0580948
ESTNV_29541_872	A	30	0.384615	0.00278157	0.0527406
ESTNV_29541_872	G	48	0.615385	0.00278157	0.0527406
ESTNV_29541_288	A	33	0.434211	0.00317557	0.0563522
ESTNV_29541_288	C	43	0.565789	0.00317557	0.0563522
GCR_cBin28164_Ctg1_223	A	60	0.75	0.0028125	0.053033
GCR_cBin28164_Ctg1_223	G	20	0.25	0.0028125	0.053033
ESTNV_29967_108	A	12	0.15	0.0013125	0.0362284
ESTNV_29967_108	G	68	0.85	0.0013125	0.0362284
GCR_cBin8926_Ctg1_226	A	8	0.1	0.001	0.0316228
GCR_cBin8926_Ctg1_226	G	72	0.9	0.001	0.0316228
ESTNV_33458_777	G	80	1	0	0
ESTNV_27886_813	A	2	0.025	0.000296875	0.0172301
ESTNV_27886_813	G	78	0.975	0.000296875	0.0172301
GCR_hBin27145_Ctg1_110	A	27	0.3375	0.00230859	0.0480478
GCR_hBin27145_Ctg1_110	G	53	0.6625	0.00230859	0.0480478
ESTNV_33232_155	A	15	0.1875	0.00208984	0.0457148
ESTNV_33232_155	C	65	0.8125	0.00208984	0.0457148
ESTNV_24376_271	A	27	0.3375	0.00293359	0.0541627
ESTNV_24376_271	G	53	0.6625	0.00293359	0.0541627
ESTNV_35394_1479	A	2	0.025	0.000296875	0.0172301
ESTNV_35394_1479	G	78	0.975	0.000296875	0.0172301
GCR_cBin31631_Ctg1_149	C	43	0.5375	0.00293359	0.0541627
GCR_cBin31631_Ctg1_149	G	37	0.4625	0.00293359	0.0541627
ESTNV_31107_540	A	36	0.45	0.003375	0.0580948
ESTNV_31107_540	C	44	0.55	0.003375	0.0580948
GCR_cBin16342_Ctg1_468	A	38	0.475	0.00279687	0.0528855
GCR_cBin16342_Ctg1_468	G	42	0.525	0.00279687	0.0528855
ESTV_19947_986	C	49	0.6125	0.00296484	0.0544504
ESTV_19947_986	G	31	0.3875	0.00296484	0.0544504
ESTNV_35822_817	A	55	0.6875	0.00240234	0.0490137
ESTNV_35822_817	G	25	0.3125	0.00240234	0.0490137
GCR_cBin6974_Ctg1_77	A	11	0.1375	0.00155859	0.039479
GCR_cBin6974_Ctg1_77	G	69	0.8625	0.00155859	0.039479
GCR_cBin27619_Ctg1_193	A	10	0.125	0.00117187	0.0342327
GCR_cBin27619_Ctg1_193	G	70	0.875	0.00117187	0.0342327
GCR_cBin15029_Ctg1_250	C	49	0.6125	0.00233984	0.0483719
GCR_cBin15029_Ctg1_250	G	31	0.3875	0.00233984	0.0483719
GCR_cBin2599_Ctg1_262	A	66	0.825	0.00173438	0.0416458
GCR_cBin2599_Ctg1_262	T	14	0.175	0.00173438	0.0416458
ESTNV_24613_246	A	55	0.6875	0.00271484	0.0521042
ESTNV_24613_246	C	25	0.3125	0.00271484	0.0521042
ESTNV_29500_554	A	48	0.6	0.00225	0.0474342
ESTNV_29500_554	C	32	0.4	0.00225	0.0474342
ESTV_16239_605	C	73	0.9125	0.000902344	0.030039
ESTV_16239_605	G	7	0.0875	0.000902344	0.030039
ESTV_16905_208	G	80	1	0	0
GCR_cBin283_Ctg1_120	A	32	0.4	0.0031875	0.0564579
GCR_cBin283_Ctg1_120	T	48	0.6	0.0031875	0.0564579
ESTNV_34118_596	A	51	0.6375	0.00218359	0.0467289
ESTNV_34118_596	G	29	0.3625	0.00218359	0.0467289
ESTNV_16766_113	A	77	0.987179	0.000160151	0.0126551
ESTNV_16766_113	T	1	0.0128205	0.000160151	0.0126551
ESTNV_34068_665	A	56	0.7	0.0018125	0.0425735
ESTNV_34068_665	G	24	0.3	0.0018125	0.0425735
ESTNV_34451_135	A	46	0.575	0.00235937	0.0485734
ESTNV_34451_135	G	34	0.425	0.00235937	0.0485734
ESTNV_28701_207	A	68	0.871795	0.00155094	0.0393819
ESTNV_28701_207	C	10	0.128205	0.00155094	0.0393819
GCR_cBin1755_Ctg1_224	A	27	0.3375	0.00262109	0.0511966
GCR_cBin1755_Ctg1_224	G	53	0.6625	0.00262109	0.0511966
GCR_hBin32129_Ctg1_119	A	1	0.0125	0.000152344	0.0123428
GCR_hBin32129_Ctg1_119	C	79	0.9875	0.000152344	0.0123428
GCR_cBin1603_Ctg1_67	A	12	0.15	0.001625	0.0403113
GCR_cBin1603_Ctg1_67	G	68	0.85	0.001625	0.0403113
GCR_cBin20843_Ctg1_110	A	18	0.225	0.00185937	0.0431205
GCR_cBin20843_Ctg1_110	G	62	0.775	0.00185937	0.0431205
ESTV_21966_300	A	34	0.425	0.00267188	0.0516902
ESTV_21966_300	G	46	0.575	0.00267188	0.0516902
ESTNV_29234_195	A	5	0.0625	0.000683594	0.0261456
ESTNV_29234_195	C	75	0.9375	0.000683594	0.0261456
ESTV_18152_336	A	77	0.9625	0.000433594	0.0208229
ESTV_18152_336	T	3	0.0375	0.000433594	0.0208229
ESTNV_29391_150	A	56	0.7	0.0024375	0.049371
ESTNV_29391_150	G	24	0.3	0.0024375	0.049371
GCR_cBin41648_Ctg1_124	A	79	0.9875	0.000152344	0.0123428
GCR_cBin41648_Ctg1_124	C	1	0.0125	0.000152344	0.0123428
ESTV_16288_295	C	45	0.5625	0.00318359	0.0564233
ESTV_16288_295	G	35	0.4375	0.00318359	0.0564233
ESTV_17470_405	A	33	0.4125	0.00246484	0.0496472
ESTV_17470_405	G	47	0.5875	0.00246484	0.0496472
ESTV_17405_76	C	34	0.425	0.00360938	0.0600781
ESTV_17405_76	G	46	0.575	0.00360938	0.0600781
ESTNV_32552_113	A	66	0.825	0.00142187	0.0377078
ESTNV_32552_113	C	14	0.175	0.00142187	0.0377078
ESTNV_34925_2923	G	80	1	0	0
ESTNV_23083_64	A	39	0.513158	0.0025924	0.0509156
ESTNV_23083_64	G	37	0.486842	0.0025924	0.0509156
GCR_cBin22452_Ctg1_155	A	9	0.1125	0.00140234	0.0374479
GCR_cBin22452_Ctg1_155	C	71	0.8875	0.00140234	0.0374479
GCR_cBin22452_Ctg1_142	A	9	0.1125	0.00140234	0.0374479
GCR_cBin22452_Ctg1_142	G	71	0.8875	0.00140234	0.0374479
ESTNV_37675_1953	A	65	0.8125	0.00208984	0.0457148
ESTNV_37675_1953	G	15	0.1875	0.00208984	0.0457148
ESTNV_35592_1024	A	79	0.9875	0.000152344	0.0123428
ESTNV_35592_1024	G	1	0.0125	0.000152344	0.0123428
BASS118_B7_B11_507	A	53	0.6625	0.00168359	0.0410316
BASS118_B7_B11_507	G	27	0.3375	0.00168359	0.0410316
ESTNV_36582_634	G	80	1	0	0
ESTNV_28584_983	A	80	1	0	0
ESTNV_32001_1243	G	80	1	0	0
ESTNV_26671_385	A	80	1	0	0
GCR_cBin1134_Ctg1_360	G	80	1	0	0
BASS118_B7_B11_702	A	26	0.325	0.00298438	0.0546294
BASS118_B7_B11_702	G	54	0.675	0.00298438	0.0546294
ESTNV_31895_1189	A	2	0.025	0.000296875	0.0172301
ESTNV_31895_1189	C	78	0.975	0.000296875	0.0172301
GCR_cBin50373_Ctg1_78	A	73	0.9125	0.000902344	0.030039
GCR_cBin50373_Ctg1_78	C	7	0.0875	0.000902344	0.030039
ESTNV_27544_95	A	23	0.2875	0.00246484	0.0496472
ESTNV_27544_95	C	57	0.7125	0.00246484	0.0496472
ESTNV_31140_226	A	21	0.2625	0.00249609	0.0499609
ESTNV_31140_226	C	59	0.7375	0.00249609	0.0499609
ESTNV_31438_51	A	77	0.9625	0.000433594	0.0208229
ESTNV_31438_51	G	3	0.0375	0.000433594	0.0208229
ESTNV_32228_633	A	18	0.225	0.00248438	0.0498435
ESTNV_32228_633	G	62	0.775	0.00248438	0.0498435
GCR_cBin14555_Ctg1_93	A	80	1	0	0
GCR_cBin42832_Ctg1_109	A	25	0.3125	0.00333984	0.0577914
GCR_cBin42832_Ctg1_109	T	55	0.6875	0.00333984	0.0577914
GCR_cBin37379_Ctg1_47	A	8	0.1	0.001625	0.0403113
GCR_cBin37379_Ctg1_47	C	72	0.9	0.001625	0.0403113
ESTV_18493_1052	A	72	0.9	0.001625	0.0403113
ESTV_18493_1052	G	8	0.1	0.001625	0.0403113
ESTNV_34763_1056	A	5	0.0625	0.000683594	0.0261456
ESTNV_34763_1056	T	75	0.9375	0.000683594	0.0261456
ESTNV_34763_2153	A	69	0.8625	0.00124609	0.0353001
ESTNV_34763_2153	C	11	0.1375	0.00124609	0.0353001
GCR_cBin19457_Ctg1_45	A	11	0.1375	0.00124609	0.0353001
GCR_cBin19457_Ctg1_45	G	69	0.8625	0.00124609	0.0353001
GCR_cBin528_Ctg1_496	A	62	0.775	0.00185937	0.0431205
GCR_cBin528_Ctg1_496	G	18	0.225	0.00185937	0.0431205
ESTNV_34964_301	A	80	1	0	0
GCR_rBin1448_Ctg1_97	G	80	1	0	0
GCR_rBin3760_Ctg1_98	G	80	1	0	0
GCR_cBin8933_Ctg1_66	A	1	0.0125	0.000152344	0.0123428
GCR_cBin8933_Ctg1_66	C	79	0.9875	0.000152344	0.0123428
GCR_cBin18827_Ctg1_195	A	3	0.0375	0.000433594	0.0208229
GCR_cBin18827_Ctg1_195	C	77	0.9625	0.000433594	0.0208229
GCR_cBin46701_Ctg1_110	A	36	0.461538	0.00275628	0.0525003
GCR_cBin46701_Ctg1_110	T	42	0.538462	0.00275628	0.0525003
ESTNV_34158_505	A	7	0.0875	0.00121484	0.0348546
ESTNV_34158_505	G	73	0.9125	0.00121484	0.0348546
GCR_cBin15768_Ctg1_57	A	28	0.35	0.002875	0.053619
GCR_cBin15768_Ctg1_57	G	52	0.65	0.002875	0.053619
GCR_cBin39368_Ctg1_207	A	63	0.7875	0.00183984	0.0428934
GCR_cBin39368_Ctg1_207	C	17	0.2125	0.00183984	0.0428934
ESTNV_35436_232	A	10	0.125	0.00117187	0.0342327
ESTNV_35436_232	T	70	0.875	0.00117187	0.0342327
ESTNV_33063_792	A	20	0.25	0.0028125	0.053033
ESTNV_33063_792	G	60	0.75	0.0028125	0.053033
GCR_cBin2200_Ctg1_90	A	6	0.075	0.000796875	0.028229
GCR_cBin2200_Ctg1_90	G	74	0.925	0.000796875	0.028229
ESTNV_23390_339	A	9	0.1125	0.00108984	0.0330128
ESTNV_23390_339	C	71	0.8875	0.00108984	0.0330128
GCR_cBin5359_Ctg1_235	A	19	0.2375	0.00218359	0.0467289
GCR_cBin5359_Ctg1_235	C	61	0.7625	0.00218359	0.0467289
ESTNV_19861_125	A	61	0.7625	0.00187109	0.0432561
ESTNV_19861_125	G	19	0.2375	0.00187109	0.0432561
GCR_hBin33809_Ctg1_106	A	61	0.7625	0.00218359	0.0467289
GCR_hBin33809_Ctg1_106	G	19	0.2375	0.00218359	0.0467289
ESTNV_36266_544	A	78	0.975	0.000296875	0.0172301
ESTNV_36266_544	C	2	0.025	0.000296875	0.0172301
GCR_rBin3608_Ctg1_274	A	2	0.025	0.000296875	0.0172301
GCR_rBin3608_Ctg1_274	G	78	0.975	0.000296875	0.0172301
ESTNV_27444_1104	A	51	0.6375	0.00218359	0.0467289
ESTNV_27444_1104	G	29	0.3625	0.00218359	0.0467289
GCR_cBin50404_Ctg1_127	A	51	0.6375	0.00249609	0.0499609
GCR_cBin50404_Ctg1_127	C	29	0.3625	0.00249609	0.0499609
ESTNV_33311_572	A	20	0.25	0.0021875	0.0467707
ESTNV_33311_572	T	60	0.75	0.0021875	0.0467707
GCR_cBin38289_Ctg1_239	A	52	0.65	0.0025625	0.0506211
GCR_cBin38289_Ctg1_239	G	28	0.35	0.0025625	0.0506211
GCR_cBin52665_Ctg1_33	A	49	0.6125	0.00233984	0.0483719
GCR_cBin52665_Ctg1_33	C	31	0.3875	0.00233984	0.0483719
GCR_cBin6541_Ctg1_187	G	80	1	0	0
ESTNV_23136_481	A	68	0.85	0.0013125	0.0362284
ESTNV_23136_481	C	12	0.15	0.0013125	0.0362284
ESTNV_29410_233	A	52	0.65	0.0025625	0.0506211
ESTNV_29410_233	G	28	0.35	0.0025625	0.0506211
ESTNV_37581_1182	A	28	0.35	0.0025625	0.0506211
ESTNV_37581_1182	G	52	0.65	0.0025625	0.0506211
ESTV_16551_148	A	77	0.9625	0.000433594	0.0208229
ESTV_16551_148	G	3	0.0375	0.000433594	0.0208229
ESTV_16551_442	G	80	1	0	0
ESTNV_31278_125	A	59	0.7375	0.00249609	0.0499609
ESTNV_31278_125	C	21	0.2625	0.00249609	0.0499609
ESTNV_13016_93	A	76	0.95	0.0005625	0.0237171
ESTNV_13016_93	G	4	0.05	0.0005625	0.0237171
GCR_cBin6788_Ctg1_156	G	80	1	0	0
GCR_cBin25229_Ctg2_105	A	2	0.025	0.000296875	0.0172301
GCR_cBin25229_Ctg2_105	T	78	0.975	0.000296875	0.0172301
ESTV_15804_172	A	37	0.4625	0.00324609	0.0569745
ESTV_15804_172	G	43	0.5375	0.00324609	0.0569745
GCR_cBin50289_Ctg1_55	C	48	0.6	0.0019375	0.044017
GCR_cBin50289_Ctg1_55	G	32	0.4	0.0019375	0.044017
ESTNV_27780_352	A	75	0.9375	0.000683594	0.0261456
ESTNV_27780_352	G	5	0.0625	0.000683594	0.0261456
GCR_cBin735_Ctg2_314	C	30	0.375	0.00273437	0.0522913
GCR_cBin735_Ctg2_314	G	50	0.625	0.00273437	0.0522913
GCR_cBin5772_Ctg1_288	A	80	1	0	0
GCR_cBin28548_Ctg1_73	G	80	1	0	0
GCR_cBin5772_Ctg1_84	G	80	1	0	0
ESTNV_30491_362	A	54	0.675	0.00298438	0.0546294
ESTNV_30491_362	G	26	0.325	0.00298438	0.0546294
ESTNV_16613_137	A	10	0.125	0.00117187	0.0342327
ESTNV_16613_137	G	70	0.875	0.00117187	0.0342327
ESTNV_13258_439	A	45	0.5625	0.00318359	0.0564233
ESTNV_13258_439	C	35	0.4375	0.00318359	0.0564233
GCR_cBin44221_Ctg1_78	A	69	0.884615	0.00113792	0.033733
GCR_cBin44221_Ctg1_78	G	9	0.115385	0.00113792	0.033733
ESTNV_26616_500	A	24	0.3	0.00275	0.0524404
ESTNV_26616_500	G	56	0.7	0.00275	0.0524404
ESTNV_31519_569	A	26	0.325	0.00298438	0.0546294
ESTNV_31519_569	G	54	0.675	0.00298438	0.0546294
ESTNV_31661_274	C	4	0.05	0.0005625	0.0237171
ESTNV_31661_274	G	76	0.95	0.0005625	0.0237171
ESTV_14738_303	A	45	0.5625	0.00255859	0.0505825
ESTV_14738_303	G	35	0.4375	0.00255859	0.0505825
ESTV_13534_158	C	53	0.6625	0.00293359	0.0541627
ESTV_13534_158	G	27	0.3375	0.00293359	0.0541627
GCR_cBin34971_Ctg1_240	A	76	0.95	0.0005625	0.0237171
GCR_cBin34971_Ctg1_240	C	4	0.05	0.0005625	0.0237171
ESTNV_28965_1177	A	51	0.6375	0.00249609	0.0499609
ESTNV_28965_1177	C	29	0.3625	0.00249609	0.0499609
GCR_cBin34971_Ctg1_217	A	4	0.05	0.0005625	0.0237171
GCR_cBin34971_Ctg1_217	G	76	0.95	0.0005625	0.0237171
GCR_cBin16135_Ctg1_203	A	1	0.0125	0.000152344	0.0123428
GCR_cBin16135_Ctg1_203	T	79	0.9875	0.000152344	0.0123428
GCR_cBin12267_Ctg1_160	A	72	0.9	0.001	0.0316228
GCR_cBin12267_Ctg1_160	G	8	0.1	0.001	0.0316228
GCR_cBin12267_Ctg1_307	A	65	0.8125	0.00208984	0.0457148
GCR_cBin12267_Ctg1_307	C	15	0.1875	0.00208984	0.0457148
GCR_cBin25322_Ctg1_126	A	65	0.8125	0.00208984	0.0457148
GCR_cBin25322_Ctg1_126	G	15	0.1875	0.00208984	0.0457148
ESTNV_32152_893	A	12	0.15	0.0013125	0.0362284
ESTNV_32152_893	G	68	0.85	0.0013125	0.0362284
GCR_cBin34913_Ctg1_140	A	50	0.625	0.00210938	0.0459279
GCR_cBin34913_Ctg1_140	T	30	0.375	0.00210938	0.0459279
GCR_cBin34913_Ctg1_142	A	50	0.625	0.00210938	0.0459279
GCR_cBin34913_Ctg1_142	G	30	0.375	0.00210938	0.0459279
GCR_cBin34172_Ctg1_109	A	43	0.5375	0.00262109	0.0511966
GCR_cBin34172_Ctg1_109	C	37	0.4625	0.00262109	0.0511966
GCR_cBin25879_Ctg1_163	A	13	0.1625	0.00137109	0.0370283
GCR_cBin25879_Ctg1_163	C	67	0.8375	0.00137109	0.0370283
GCR_cBin30260_Ctg1_67	A	1	0.0125	0.000152344	0.0123428
GCR_cBin30260_Ctg1_67	C	79	0.9875	0.000152344	0.0123428
BASS12_B7_B06_623	A	36	0.45	0.00275	0.0524404
BASS12_B7_B06_623	C	44	0.55	0.00275	0.0524404
BASS12_B7_B06_1050	A	36	0.45	0.00275	0.0524404
BASS12_B7_B06_1050	G	44	0.55	0.00275	0.0524404
ESTNV_31974_783	A	57	0.7125	0.00215234	0.0463934
ESTNV_31974_783	C	23	0.2875	0.00215234	0.0463934
ESTNV_32253_402	A	44	0.55	0.0030625	0.0553399
ESTNV_32253_402	C	36	0.45	0.0030625	0.0553399
ESTNV_33590_151	C	35	0.4375	0.00318359	0.0564233
ESTNV_33590_151	G	45	0.5625	0.00318359	0.0564233
GCR_cBin6568_Ctg1_186	A	22	0.275	0.00217188	0.0466034
GCR_cBin6568_Ctg1_186	C	58	0.725	0.00217188	0.0466034
GCR_cBin13876_Ctg1_149	A	76	0.95	0.0005625	0.0237171
GCR_cBin13876_Ctg1_149	G	4	0.05	0.0005625	0.0237171
ESTNV_34575_1979	A	18	0.225	0.00185937	0.0431205
ESTNV_34575_1979	G	62	0.775	0.00185937	0.0431205
ESTNV_35937_1368	A	80	1	0	0
GCR_cBin8095_Ctg1_103	A	80	1	0	0
ESTNV_35094_1383	A	73	0.9125	0.000902344	0.030039
ESTNV_35094_1383	G	7	0.0875	0.000902344	0.030039
GCR_cBin4931_Ctg1_21	A	80	1	0	0
ESTNV_35536_1238	A	25	0.3125	0.00240234	0.0490137
ESTNV_35536_1238	G	55	0.6875	0.00240234	0.0490137
ESTNV_26812_369	A	40	0.5	0.0040625	0.0637377
ESTNV_26812_369	C	40	0.5	0.0040625	0.0637377
GCR_cBin33361_Ctg1_258	A	3	0.0375	0.000433594	0.0208229
GCR_cBin33361_Ctg1_258	G	77	0.9625	0.000433594	0.0208229
GCR_cBin5954_Ctg2_568	A	11	0.1375	0.00155859	0.039479
GCR_cBin5954_Ctg2_568	G	69	0.8625	0.00155859	0.039479
ESTV_17458_1031	A	79	0.9875	0.000152344	0.0123428
ESTV_17458_1031	G	1	0.0125	0.000152344	0.0123428
ESTNV_26812_629	C	3	0.0375	0.000433594	0.0208229
ESTNV_26812_629	G	77	0.9625	0.000433594	0.0208229
GCR_cBin8426_Ctg1_154	A	57	0.7125	0.00246484	0.0496472
GCR_cBin8426_Ctg1_154	C	23	0.2875	0.00246484	0.0496472
GCR_cBin8426_Ctg1_200	A	23	0.2875	0.00246484	0.0496472
GCR_cBin8426_Ctg1_200	C	57	0.7125	0.00246484	0.0496472
GCR_cBin22215_Ctg1_184	C	23	0.2875	0.00246484	0.0496472
GCR_cBin22215_Ctg1_184	G	57	0.7125	0.00246484	0.0496472
GCR_cBin25891_Ctg1_305	A	76	0.95	0.0005625	0.0237171
GCR_cBin25891_Ctg1_305	C	4	0.05	0.0005625	0.0237171
GCR_cBin10801_Ctg1_300	A	47	0.5875	0.00246484	0.0496472
GCR_cBin10801_Ctg1_300	T	33	0.4125	0.00246484	0.0496472
ESTNV_32268_419	A	26	0.325	0.00267188	0.0516902
ESTNV_32268_419	G	54	0.675	0.00267188	0.0516902
ESTNV_28460_586	A	29	0.3625	0.00280859	0.0529962
ESTNV_28460_586	T	51	0.6375	0.00280859	0.0529962
GCR_cBin7903_Ctg1_574	A	2	0.025	0.000296875	0.0172301
GCR_cBin7903_Ctg1_574	C	78	0.975	0.000296875	0.0172301
ESTNV_37373_1395	A	24	0.3	0.00275	0.0524404
ESTNV_37373_1395	G	56	0.7	0.00275	0.0524404
ESTNV_30312_1019	C	35	0.4375	0.00224609	0.047393
ESTNV_30312_1019	G	45	0.5625	0.00224609	0.047393
ESTNV_37123_898	A	71	0.8875	0.00108984	0.0330128
ESTNV_37123_898	G	9	0.1125	0.00108984	0.0330128
ESTNV_19653_283	A	6	0.075	0.000796875	0.028229
ESTNV_19653_283	G	74	0.925	0.000796875	0.028229
ESTNV_37153_794	A	46	0.575	0.00267188	0.0516902
ESTNV_37153_794	G	34	0.425	0.00267188	0.0516902
ESTNV_19668_192	C	65	0.8125	0.00177734	0.0421586
ESTNV_19668_192	G	15	0.1875	0.00177734	0.0421586
GCR_cBin41593_Ctg1_194	C	80	1	0	0
GCR_cBin25388_Ctg1_108	A	71	0.8875	0.00108984	0.0330128
GCR_cBin25388_Ctg1_108	C	9	0.1125	0.00108984	0.0330128
GCR_cBin25388_Ctg1_170	A	71	0.8875	0.00108984	0.0330128
GCR_cBin25388_Ctg1_170	T	9	0.1125	0.00108984	0.0330128
ESTNV_33983_368	A	80	1	0	0
ESTNV_33983_223	G	80	1	0	0
ESTV_15373_465	A	8	0.1	0.001	0.0316228
ESTV_15373_465	G	72	0.9	0.001	0.0316228
ESTV_20583_309	C	68	0.85	0.0013125	0.0362284
ESTV_20583_309	G	12	0.15	0.0013125	0.0362284
ESTNV_37479_1245	A	75	0.9375	0.000683594	0.0261456
ESTNV_37479_1245	T	5	0.0625	0.000683594	0.0261456
ESTNV_36072_124	A	6	0.075	0.000796875	0.028229
ESTNV_36072_124	G	74	0.925	0.000796875	0.028229
ESTNV_30452_1210	A	59	0.7375	0.00218359	0.0467289
ESTNV_30452_1210	C	21	0.2625	0.00218359	0.0467289
ESTNV_36704_1199	A	60	0.789474	0.00194999	0.0441587
ESTNV_36704_1199	G	16	0.210526	0.00194999	0.0441587
GCR_cBin15414_Ctg1_275	A	18	0.225	0.00185937	0.0431205
GCR_cBin15414_Ctg1_275	G	62	0.775	0.00185937	0.0431205
ESTV_21022_166	A	18	0.225	0.00185937	0.0431205
ESTV_21022_166	C	62	0.775	0.00185937	0.0431205
GCR_cBin16057_Ctg1_166	A	80	1	0	0
GCR_cBin16057_Ctg1_199	A	80	1	0	0
GCR_cBin531_Ctg1_115	A	9	0.1125	0.00108984	0.0330128
GCR_cBin531_Ctg1_115	G	71	0.8875	0.00108984	0.0330128
GCR_cBin36646_Ctg1_99	A	76	0.95	0.0005625	0.0237171
GCR_cBin36646_Ctg1_99	C	4	0.05	0.0005625	0.0237171
GCR_cBin43234_Ctg1_170	A	4	0.05	0.0005625	0.0237171
GCR_cBin43234_Ctg1_170	G	76	0.95	0.0005625	0.0237171
GCR_cBin36646_Ctg1_106	A	4	0.05	0.0005625	0.0237171
GCR_cBin36646_Ctg1_106	T	76	0.95	0.0005625	0.0237171
GCR_cBin8483_Ctg1_179	A	32	0.4	0.0031875	0.0564579
GCR_cBin8483_Ctg1_179	G	48	0.6	0.0031875	0.0564579
GCR_cBin8483_Ctg1_168	A	48	0.6	0.0031875	0.0564579
GCR_cBin8483_Ctg1_168	C	32	0.4	0.0031875	0.0564579
GCR_cBin36902_Ctg1_70	A	8	0.1	0.0013125	0.0362284
GCR_cBin36902_Ctg1_70	T	72	0.9	0.0013125	0.0362284
GCR_cBin22155_Ctg1_66	A	18	0.225	0.00185937	0.0431205
GCR_cBin22155_Ctg1_66	G	62	0.775	0.00185937	0.0431205
GCR_cBin22155_Ctg1_21	A	18	0.230769	0.00192181	0.0438385
GCR_cBin22155_Ctg1_21	G	60	0.769231	0.00192181	0.0438385
ESTV_21093_430	A	18	0.225	0.00217188	0.0466034
ESTV_21093_430	G	62	0.775	0.00217188	0.0466034
GCR_cBin4378_Ctg1_115	A	21	0.2625	0.00280859	0.0529962
GCR_cBin4378_Ctg1_115	G	59	0.7375	0.00280859	0.0529962
GCR_cBin15199_Ctg1_186	A	29	0.3625	0.00280859	0.0529962
GCR_cBin15199_Ctg1_186	G	51	0.6375	0.00280859	0.0529962
ESTNV_32124_500	A	44	0.55	0.0030625	0.0553399
ESTNV_32124_500	G	36	0.45	0.0030625	0.0553399
ESTNV_36871_194	C	35	0.4375	0.00318359	0.0564233
ESTNV_36871_194	G	45	0.5625	0.00318359	0.0564233
GCR_cBin17984_Ctg1_90	A	54	0.675	0.00235937	0.0485734
GCR_cBin17984_Ctg1_90	G	26	0.325	0.00235937	0.0485734
ESTNV_36871_453	A	41	0.5125	0.00296484	0.0544504
ESTNV_36871_453	C	39	0.4875	0.00296484	0.0544504
ESTNV_36871_663	A	41	0.5125	0.00296484	0.0544504
ESTNV_36871_663	C	39	0.4875	0.00296484	0.0544504
ESTV_10747_366	A	9	0.1125	0.00108984	0.0330128
ESTV_10747_366	G	71	0.8875	0.00108984	0.0330128
ESTNV_31289_1032	A	72	0.9	0.0013125	0.0362284
ESTNV_31289_1032	C	8	0.1	0.0013125	0.0362284
ESTNV_35334_747	A	46	0.575	0.00360938	0.0600781
ESTNV_35334_747	C	34	0.425	0.00360938	0.0600781
ESTNV_35334_1410	A	46	0.575	0.00360938	0.0600781
ESTNV_35334_1410	G	34	0.425	0.00360938	0.0600781
ESTNV_19071_457	A	36	0.45	0.00275	0.0524404
ESTNV_19071_457	C	44	0.55	0.00275	0.0524404
ESTNV_29283_367	A	42	0.525	0.00279687	0.0528855
ESTNV_29283_367	G	38	0.475	0.00279687	0.0528855
GCR_cBin11404_Ctg1_50	C	39	0.4875	0.00327734	0.0572481
GCR_cBin11404_Ctg1_50	G	41	0.5125	0.00327734	0.0572481
ESTNV_22983_475	A	77	0.9625	0.000433594	0.0208229
ESTNV_22983_475	T	3	0.0375	0.000433594	0.0208229
GCR_cBin9116_Ctg1_146	A	80	1	0	0
GCR_cBin9116_Ctg1_67	C	80	1	0	0
GCR_cBin30245_Ctg1_84	A	80	1	0	0
ESTNV_35215_1505	A	23	0.2875	0.00215234	0.0463934
ESTNV_35215_1505	G	57	0.7125	0.00215234	0.0463934
GCR_cBin780_Ctg1_144	A	68	0.85	0.0013125	0.0362284
GCR_cBin780_Ctg1_144	G	12	0.15	0.0013125	0.0362284
ESTNV_29224_109	A	77	0.9625	0.000433594	0.0208229
ESTNV_29224_109	G	3	0.0375	0.000433594	0.0208229
GCR_cBin17160_Ctg1_108	A	42	0.525	0.00342188	0.0584968
GCR_cBin17160_Ctg1_108	G	38	0.475	0.00342188	0.0584968
GCR_cBin2785_Ctg1_206	C	42	0.525	0.00342188	0.0584968
GCR_cBin2785_Ctg1_206	G	38	0.475	0.00342188	0.0584968
GCR_cBin20352_Ctg1_163	A	13	0.1625	0.00199609	0.0446777
GCR_cBin20352_Ctg1_163	G	67	0.8375	0.00199609	0.0446777
ESTV_16907_342	A	61	0.7625	0.00187109	0.0432561
ESTV_16907_342	G	19	0.2375	0.00187109	0.0432561
GCR_cBin9323_Ctg1_78	A	61	0.7625	0.00187109	0.0432561
GCR_cBin9323_Ctg1_78	C	19	0.2375	0.00187109	0.0432561
GCR_cBin49299_Ctg1_186	A	43	0.5375	0.00293359	0.0541627
GCR_cBin49299_Ctg1_186	G	37	0.4625	0.00293359	0.0541627
ESTNV_32102_56	A	65	0.8125	0.00177734	0.0421586
ESTNV_32102_56	G	15	0.1875	0.00177734	0.0421586
ESTV_20256_233	A	50	0.625	0.00273437	0.0522913
ESTV_20256_233	G	30	0.375	0.00273437	0.0522913
ESTV_20256_375	A	50	0.625	0.00273437	0.0522913
ESTV_20256_375	T	30	0.375	0.00273437	0.0522913
ESTNV_36130_3412	C	47	0.5875	0.00308984	0.0555864
ESTNV_36130_3412	G	33	0.4125	0.00308984	0.0555864
ESTNV_31896_140	A	69	0.8625	0.00124609	0.0353001
ESTNV_31896_140	C	11	0.1375	0.00124609	0.0353001
ESTNV_31896_408	A	11	0.1375	0.00124609	0.0353001
ESTNV_31896_408	G	69	0.8625	0.00124609	0.0353001
GCR_cBin15418_Ctg1_123	A	34	0.425	0.00298438	0.0546294
GCR_cBin15418_Ctg1_123	G	46	0.575	0.00298438	0.0546294
ESTNV_24505_142	C	32	0.4	0.0031875	0.0564579
ESTNV_24505_142	G	48	0.6	0.0031875	0.0564579
ESTNV_36717_1690	G	80	1	0	0
GCR_cBin38330_Ctg1_135	A	4	0.0512821	0.00059003	0.0242905
GCR_cBin38330_Ctg1_135	C	74	0.948718	0.00059003	0.0242905
GCR_cBin332_Ctg1_80	G	80	1	0	0
ESTNV_35205_1428	A	74	0.925	0.000796875	0.028229
ESTNV_35205_1428	C	6	0.075	0.000796875	0.028229
ESTNV_25127_174	A	71	0.8875	0.00108984	0.0330128
ESTNV_25127_174	T	9	0.1125	0.00108984	0.0330128
ESTNV_35387_1829	A	69	0.8625	0.00124609	0.0353001
ESTNV_35387_1829	C	11	0.1375	0.00124609	0.0353001
GCR_cBin27124_Ctg1_83	A	29	0.3625	0.00374609	0.0612053
GCR_cBin27124_Ctg1_83	C	51	0.6375	0.00374609	0.0612053
GCR_cBin48578_Ctg1_194	A	54	0.675	0.00267188	0.0516902
GCR_cBin48578_Ctg1_194	G	26	0.325	0.00267188	0.0516902
GCR_cBin30256_Ctg1_109	A	62	0.775	0.00217188	0.0466034
GCR_cBin30256_Ctg1_109	T	18	0.225	0.00217188	0.0466034
GCR_cBin30256_Ctg1_176	C	59	0.7375	0.00249609	0.0499609
GCR_cBin30256_Ctg1_176	G	21	0.2625	0.00249609	0.0499609
GCR_cBin30256_Ctg1_74	A	21	0.2625	0.00249609	0.0499609
GCR_cBin30256_Ctg1_74	G	59	0.7375	0.00249609	0.0499609
GCR_cBin1614_Ctg1_629	A	38	0.475	0.00279687	0.0528855
GCR_cBin1614_Ctg1_629	G	42	0.525	0.00279687	0.0528855
GCR_cBin2536_Ctg1_238	C	5	0.0625	0.000683594	0.0261456
GCR_cBin2536_Ctg1_238	G	75	0.9375	0.000683594	0.0261456
GCR_cBin1614_Ctg1_237	A	42	0.525	0.00279687	0.0528855
GCR_cBin1614_Ctg1_237	C	38	0.475	0.00279687	0.0528855
GCR_cBin30250_Ctg1_267	A	41	0.5125	0.00265234	0.0515009
GCR_cBin30250_Ctg1_267	C	39	0.4875	0.00265234	0.0515009
GCR_cBin4787_Ctg1_387	A	2	0.025	0.000296875	0.0172301
GCR_cBin4787_Ctg1_387	G	78	0.975	0.000296875	0.0172301
GCR_cBin33124_Ctg1_35	A	40	0.5	0.003125	0.0559017
GCR_cBin33124_Ctg1_35	G	40	0.5	0.003125	0.0559017
ESTNV_35077_1676	G	80	1	0	0
GCR_cBin8585_Ctg1_77	A	48	0.6	0.0031875	0.0564579
GCR_cBin8585_Ctg1_77	G	32	0.4	0.0031875	0.0564579
ESTNV_30121_652	A	31	0.3875	0.00296484	0.0544504
ESTNV_30121_652	G	49	0.6125	0.00296484	0.0544504
ESTV_21970_586	A	12	0.15	0.0019375	0.044017
ESTV_21970_586	C	68	0.85	0.0019375	0.044017
GCR_cBin42759_Ctg1_238	A	23	0.2875	0.00340234	0.0583296
GCR_cBin42759_Ctg1_238	G	57	0.7125	0.00340234	0.0583296
GCR_cBin30179_Ctg1_191	A	15	0.1875	0.00208984	0.0457148
GCR_cBin30179_Ctg1_191	T	65	0.8125	0.00208984	0.0457148
ESTV_12578_95	A	7	0.0875	0.000902344	0.030039
ESTV_12578_95	C	73	0.9125	0.000902344	0.030039
GCR_cBin8424_Ctg1_31	A	70	0.875	0.00117187	0.0342327
GCR_cBin8424_Ctg1_31	C	10	0.125	0.00117187	0.0342327
ESTNV_26787_1038	A	64	0.8	0.0018125	0.0425735
ESTNV_26787_1038	C	16	0.2	0.0018125	0.0425735
GCR_cBin3322_Ctg1_167	A	23	0.2875	0.00277734	0.0527005
GCR_cBin3322_Ctg1_167	G	57	0.7125	0.00277734	0.0527005
GCR_cBin3071_Ctg1_51	A	12	0.15	0.001625	0.0403113
GCR_cBin3071_Ctg1_51	G	68	0.85	0.001625	0.0403113
ESTNV_25443_600	A	8	0.1	0.0013125	0.0362284
ESTNV_25443_600	G	72	0.9	0.0013125	0.0362284
GCR_cBin13688_Ctg1_129	A	8	0.1	0.0013125	0.0362284
GCR_cBin13688_Ctg1_129	G	72	0.9	0.0013125	0.0362284
GCR_cBin39943_Ctg1_265	A	2	0.025	0.000296875	0.0172301
GCR_cBin39943_Ctg1_265	G	78	0.975	0.000296875	0.0172301
GCR_cBin23202_Ctg1_93	A	68	0.85	0.001625	0.0403113
GCR_cBin23202_Ctg1_93	G	12	0.15	0.001625	0.0403113
ESTNV_31093_1513	A	79	0.9875	0.000152344	0.0123428
ESTNV_31093_1513	T	1	0.0125	0.000152344	0.0123428
ESTV_13699_319	C	11	0.1375	0.00155859	0.039479
ESTV_13699_319	G	69	0.8625	0.00155859	0.039479
ESTNV_28113_144	A	63	0.7875	0.00215234	0.0463934
ESTNV_28113_144	C	17	0.2125	0.00215234	0.0463934
ESTNV_28113_319	A	63	0.7875	0.00215234	0.0463934
ESTNV_28113_319	C	17	0.2125	0.00215234	0.0463934
BASS124_B7_D10_265	A	59	0.7375	0.00249609	0.0499609
BASS124_B7_D10_265	G	21	0.2625	0.00249609	0.0499609
BASS124_B7_D10_722	A	66	0.825	0.00204688	0.0452424
BASS124_B7_D10_722	C	14	0.175	0.00204688	0.0452424
GCR_cBin6609_Ctg1_85	A	21	0.2625	0.00249609	0.0499609
GCR_cBin6609_Ctg1_85	C	59	0.7375	0.00249609	0.0499609
GCR_cBin6609_Ctg1_88	A	59	0.7375	0.00249609	0.0499609
GCR_cBin6609_Ctg1_88	G	21	0.2625	0.00249609	0.0499609
ESTNV_36462_1509	A	10	0.125	0.00148438	0.0385276
ESTNV_36462_1509	G	70	0.875	0.00148438	0.0385276
GCR_cBin6609_Ctg1_71	A	28	0.35	0.002875	0.053619
GCR_cBin6609_Ctg1_71	G	52	0.65	0.002875	0.053619
ESTV_15119_356	A	80	1	0	0
ESTV_15119_669	A	1	0.0125	0.000152344	0.0123428
ESTV_15119_669	G	79	0.9875	0.000152344	0.0123428
ESTV_17201_545	A	26	0.325	0.00267188	0.0516902
ESTV_17201_545	C	54	0.675	0.00267188	0.0516902
GCR_cBin612_Ctg1_226	A	76	0.95	0.0005625	0.0237171
GCR_cBin612_Ctg1_226	G	4	0.05	0.0005625	0.0237171
GCR_cBin612_Ctg1_112	A	76	0.95	0.0005625	0.0237171
GCR_cBin612_Ctg1_112	T	4	0.05	0.0005625	0.0237171
ESTV_17314_458	A	18	0.225	0.00217188	0.0466034
ESTV_17314_458	G	62	0.775	0.00217188	0.0466034
ESTNV_33518_1279	A	5	0.0625	0.000683594	0.0261456
ESTNV_33518_1279	G	75	0.9375	0.000683594	0.0261456
ESTV_14711_157	C	5	0.0625	0.000683594	0.0261456
ESTV_14711_157	G	75	0.9375	0.000683594	0.0261456
ESTNV_33256_490	A	33	0.4125	0.00308984	0.0555864
ESTNV_33256_490	C	47	0.5875	0.00308984	0.0555864
ESTNV_35896_536	C	80	1	0	0
ESTNV_23557_1342	A	80	1	0	0
ESTNV_34257_418	A	33	0.4125	0.00371484	0.0609495
ESTNV_34257_418	G	47	0.5875	0.00371484	0.0609495
ESTNV_30607_306	A	74	0.925	0.000796875	0.028229
ESTNV_30607_306	C	6	0.075	0.000796875	0.028229
ESTV_16586_812	A	80	1	0	0
GCR_cBin959_Ctg1_31	C	69	0.8625	0.00155859	0.039479
GCR_cBin959_Ctg1_31	G	11	0.1375	0.00155859	0.039479
GCR_cBin47_Ctg1_552	A	68	0.85	0.0019375	0.044017
GCR_cBin47_Ctg1_552	G	12	0.15	0.0019375	0.044017
ESTNV_30699_568	A	38	0.475	0.00342188	0.0584968
ESTNV_30699_568	C	42	0.525	0.00342188	0.0584968
GCR_cBin10694_Ctg1_368	A	2	0.025	0.000296875	0.0172301
GCR_cBin10694_Ctg1_368	G	78	0.975	0.000296875	0.0172301
ESTNV_35766_1019	A	3	0.0375	0.000433594	0.0208229
ESTNV_35766_1019	T	77	0.9625	0.000433594	0.0208229
ESTNV_35766_1178	A	2	0.025	0.000296875	0.0172301
ESTNV_35766_1178	G	78	0.975	0.000296875	0.0172301
ESTNV_16380_81	A	79	0.9875	0.000152344	0.0123428
ESTNV_16380_81	C	1	0.0125	0.000152344	0.0123428
ESTNV_35628_2851	A	9	0.1125	0.00140234	0.0374479
ESTNV_35628_2851	C	71	0.8875	0.00140234	0.0374479
GCR_cBin2723_Ctg1_244	A	2	0.025	0.000296875	0.0172301
GCR_cBin2723_Ctg1_244	G	78	0.975	0.000296875	0.0172301
ESTNV_31916_578	A	56	0.7	0.0024375	0.049371
ESTNV_31916_578	C	24	0.3	0.0024375	0.049371
ESTNV_35628_2366	A	2	0.025	0.000296875	0.0172301
ESTNV_35628_2366	T	78	0.975	0.000296875	0.0172301
GCR_cBin41959_Ctg1_48	A	78	0.975	0.000296875	0.0172301
GCR_cBin41959_Ctg1_48	C	2	0.025	0.000296875	0.0172301
GCR_cBin31945_Ctg1_172	A	8	0.1	0.0013125	0.0362284
GCR_cBin31945_Ctg1_172	G	72	0.9	0.0013125	0.0362284
GCR_cBin38135_Ctg1_130	A	8	0.1	0.0013125	0.0362284
GCR_cBin38135_Ctg1_130	T	72	0.9	0.0013125	0.0362284
ESTV_18633_368	A	64	0.8	0.0024375	0.049371
ESTV_18633_368	G	16	0.2	0.0024375	0.049371
ESTNV_33335_64	A	39	0.4875	0.00358984	0.0599153
ESTNV_33335_64	G	41	0.5125	0.00358984	0.0599153
GCR_rBin17113_Ctg1_146	A	45	0.5625	0.00349609	0.0591278
GCR_rBin17113_Ctg1_146	C	35	0.4375	0.00349609	0.0591278
GCR_cBin38782_Ctg1_147	A	71	0.8875	0.00108984	0.0330128
GCR_cBin38782_Ctg1_147	G	9	0.1125	0.00108984	0.0330128
ESTNV_36893_386	A	33	0.4125	0.00308984	0.0555864
ESTNV_36893_386	G	47	0.5875	0.00308984	0.0555864
ESTNV_34577_143	A	72	0.9	0.001	0.0316228
ESTNV_34577_143	C	8	0.1	0.001	0.0316228
ESTNV_33032_67	A	26	0.325	0.00329687	0.0574184
ESTNV_33032_67	G	54	0.675	0.00329687	0.0574184
ESTNV_26918_325	A	78	0.975	0.000296875	0.0172301
ESTNV_26918_325	C	2	0.025	0.000296875	0.0172301
ESTNV_35466_1485	A	18	0.225	0.00248438	0.0498435
ESTNV_35466_1485	G	62	0.775	0.00248438	0.0498435
ESTNV_34644_2797	C	80	1	0	0
ESTNV_36457_2447	A	35	0.4375	0.00193359	0.0439726
ESTNV_36457_2447	G	45	0.5625	0.00193359	0.0439726
ESTNV_29707_992	G	80	1	0	0
ESTV_15722_638	A	4	0.05	0.0005625	0.0237171
ESTV_15722_638	G	76	0.95	0.0005625	0.0237171
ESTNV_33266_651	A	73	0.9125	0.00121484	0.0348546
ESTNV_33266_651	C	7	0.0875	0.00121484	0.0348546
ESTNV_33608_1627	C	43	0.5375	0.00168359	0.0410316
ESTNV_33608_1627	G	37	0.4625	0.00168359	0.0410316
ESTNV_13978_305	A	13	0.1625	0.00199609	0.0446777
ESTNV_13978_305	G	67	0.8375	0.00199609	0.0446777
ESTV_17836_900	A	70	0.875	0.00117187	0.0342327
ESTV_17836_900	G	10	0.125	0.00117187	0.0342327
ESTNV_35151_385	C	72	0.9	0.001	0.0316228
ESTNV_35151_385	G	8	0.1	0.001	0.0316228
ESTNV_32218_633	A	45	0.5625	0.00318359	0.0564233
ESTNV_32218_633	G	35	0.4375	0.00318359	0.0564233
ESTV_20996_116	A	49	0.6125	0.00327734	0.0572481
ESTV_20996_116	C	31	0.3875	0.00327734	0.0572481
GCR_cBin745_Ctg2_456	A	4	0.05	0.0005625	0.0237171
GCR_cBin745_Ctg2_456	G	76	0.95	0.0005625	0.0237171
GCR_cBin745_Ctg2_344	A	80	1	0	0
GCR_cBin21647_Ctg1_220	A	78	0.975	0.000296875	0.0172301
GCR_cBin21647_Ctg1_220	T	2	0.025	0.000296875	0.0172301
GCR_cBin33130_Ctg1_122	A	1	0.0125	0.000152344	0.0123428
GCR_cBin33130_Ctg1_122	G	79	0.9875	0.000152344	0.0123428
GCR_cBin47864_Ctg1_28	A	28	0.35	0.0031875	0.0564579
GCR_cBin47864_Ctg1_28	C	52	0.65	0.0031875	0.0564579
GCR_cBin6555_Ctg1_102	A	1	0.0125	0.000152344	0.0123428
GCR_cBin6555_Ctg1_102	C	79	0.9875	0.000152344	0.0123428
GCR_cBin6555_Ctg1_258	A	2	0.025	0.000296875	0.0172301
GCR_cBin6555_Ctg1_258	C	78	0.975	0.000296875	0.0172301
GCR_cBin48426_Ctg1_136	C	80	1	0	0
GCR_cBin30011_Ctg1_172	C	80	1	0	0
ESTNV_30477_550	A	65	0.8125	0.00177734	0.0421586
ESTNV_30477_550	G	15	0.1875	0.00177734	0.0421586
GCR_cBin5951_Ctg1_108	A	8	0.1	0.0013125	0.0362284
GCR_cBin5951_Ctg1_108	C	72	0.9	0.0013125	0.0362284
GCR_cBin34041_Ctg1_311	A	50	0.625	0.00273437	0.0522913
GCR_cBin34041_Ctg1_311	G	30	0.375	0.00273437	0.0522913
GCR_cBin6674_Ctg1_36	A	6	0.075	0.00110937	0.0333073
GCR_cBin6674_Ctg1_36	C	74	0.925	0.00110937	0.0333073
GCR_cBin23470_Ctg1_62	A	47	0.5875	0.00308984	0.0555864
GCR_cBin23470_Ctg1_62	G	33	0.4125	0.00308984	0.0555864
ESTNV_33867_553	C	71	0.8875	0.00108984	0.0330128
ESTNV_33867_553	G	9	0.1125	0.00108984	0.0330128
GCR_cBin19578_Ctg1_70	A	22	0.275	0.00279687	0.0528855
GCR_cBin19578_Ctg1_70	G	58	0.725	0.00279687	0.0528855
ESTNV_23914_404	G	80	1	0	0
GCR_cBin42906_Ctg1_128	A	23	0.2875	0.00183984	0.0428934
GCR_cBin42906_Ctg1_128	G	57	0.7125	0.00183984	0.0428934
ESTV_14035_356	A	79	0.9875	0.000152344	0.0123428
ESTV_14035_356	C	1	0.0125	0.000152344	0.0123428
ESTNV_28531_364	G	80	1	0	0
GCR_cBin14760_Ctg1_76	A	62	0.775	0.00154688	0.0393303
GCR_cBin14760_Ctg1_76	C	18	0.225	0.00154688	0.0393303
ESTNV_35783_626	G	80	1	0	0
ESTNV_35783_1291	A	1	0.0125	0.000152344	0.0123428
ESTNV_35783_1291	G	79	0.9875	0.000152344	0.0123428
GCR_cBin32172_Ctg1_145	A	80	1	0	0
GCR_cBin32172_Ctg1_47	G	80	1	0	0
GCR_hBin20109_Ctg1_164	G	80	1	0	0
GCR_cBin4288_Ctg1_82	A	80	1	0	0
GCR_cBin4288_Ctg1_252	G	80	1	0	0
GCR_rBin15703_Ctg1_214	A	1	0.0125	0.000152344	0.0123428
GCR_rBin15703_Ctg1_214	G	79	0.9875	0.000152344	0.0123428
GCR_cBin1659_Ctg1_213	A	28	0.35	0.002875	0.053619
GCR_cBin1659_Ctg1_213	G	52	0.65	0.002875	0.053619
GCR_cBin26421_Ctg1_81	A	21	0.2625	0.00249609	0.0499609
GCR_cBin26421_Ctg1_81	G	59	0.7375	0.00249609	0.0499609
ESTV_20470_501	C	34	0.425	0.00329687	0.0574184
ESTV_20470_501	G	46	0.575	0.00329687	0.0574184
GCR_cBin23258_Ctg1_190	A	53	0.6625	0.00293359	0.0541627
GCR_cBin23258_Ctg1_190	C	27	0.3375	0.00293359	0.0541627
GCR_cBin19351_Ctg1_165	A	12	0.15	0.001625	0.0403113
GCR_cBin19351_Ctg1_165	C	68	0.85	0.001625	0.0403113
GCR_cBin42451_Ctg1_191	A	77	0.9625	0.000433594	0.0208229
GCR_cBin42451_Ctg1_191	C	3	0.0375	0.000433594	0.0208229
BASS110_B6A_E06_264	A	59	0.7375	0.00218359	0.0467289
BASS110_B6A_E06_264	G	21	0.2625	0.00218359	0.0467289
GCR_cBin10510_Ctg1_197	A	36	0.45	0.003375	0.0580948
GCR_cBin10510_Ctg1_197	G	44	0.55	0.003375	0.0580948
ESTNV_12902_251	A	32	0.4	0.002875	0.053619
ESTNV_12902_251	G	48	0.6	0.002875	0.053619
ESTNV_36163_936	A	44	0.55	0.002125	0.0460977
ESTNV_36163_936	G	36	0.45	0.002125	0.0460977
ESTNV_23562_420	A	57	0.7125	0.00246484	0.0496472
ESTNV_23562_420	G	23	0.2875	0.00246484	0.0496472
GCR_cBin21084_Ctg1_69	A	17	0.2125	0.00152734	0.0390812
GCR_cBin21084_Ctg1_69	G	63	0.7875	0.00152734	0.0390812
GCR_cBin27595_Ctg1_103	A	80	1	0	0
GCR_cBin2432_Ctg1_559	A	7	0.0875	0.000902344	0.030039
GCR_cBin2432_Ctg1_559	G	73	0.9125	0.000902344	0.030039
GCR_hBin1530_Ctg1_68	A	76	0.95	0.0005625	0.0237171
GCR_hBin1530_Ctg1_68	T	4	0.05	0.0005625	0.0237171
ESTV_17164_89	A	25	0.3125	0.00271484	0.0521042
ESTV_17164_89	G	55	0.6875	0.00271484	0.0521042
ESTNV_32560_1127	A	32	0.4	0.0019375	0.044017
ESTNV_32560_1127	G	48	0.6	0.0019375	0.044017
ESTNV_29923_186	A	2	0.025	0.000296875	0.0172301
ESTNV_29923_186	G	78	0.975	0.000296875	0.0172301
GCR_cBin6775_Ctg1_75	A	46	0.575	0.00298438	0.0546294
GCR_cBin6775_Ctg1_75	G	34	0.425	0.00298438	0.0546294
GCR_cBin26628_Ctg1_243	A	32	0.4	0.0035	0.0591608
GCR_cBin26628_Ctg1_243	C	48	0.6	0.0035	0.0591608
GCR_cBin1711_Ctg1_654	A	47	0.5875	0.00308984	0.0555864
GCR_cBin1711_Ctg1_654	G	33	0.4125	0.00308984	0.0555864
GCR_cBin19737_Ctg1_226	A	47	0.5875	0.00308984	0.0555864
GCR_cBin19737_Ctg1_226	G	33	0.4125	0.00308984	0.0555864
GCR_cBin19737_Ctg1_139	A	47	0.5875	0.00308984	0.0555864
GCR_cBin19737_Ctg1_139	C	33	0.4125	0.00308984	0.0555864
GCR_cBin21489_Ctg1_370	A	74	0.925	0.000796875	0.028229
GCR_cBin21489_Ctg1_370	G	6	0.075	0.000796875	0.028229
GCR_cBin3741_Ctg1_126	C	33	0.4125	0.00277734	0.0527005
GCR_cBin3741_Ctg1_126	G	47	0.5875	0.00277734	0.0527005
ESTNV_25641_253	A	62	0.775	0.00185937	0.0431205
ESTNV_25641_253	C	18	0.225	0.00185937	0.0431205
ESTV_21342_355	A	51	0.6375	0.00218359	0.0467289
ESTV_21342_355	G	29	0.3625	0.00218359	0.0467289
GCR_cBin37684_Ctg1_55	A	48	0.6	0.002875	0.053619
GCR_cBin37684_Ctg1_55	G	32	0.4	0.002875	0.053619
GCR_cBin31693_Ctg1_74	A	67	0.8375	0.00168359	0.0410316
GCR_cBin31693_Ctg1_74	C	13	0.1625	0.00168359	0.0410316
GCR_cBin31693_Ctg1_166	A	67	0.8375	0.00168359	0.0410316
GCR_cBin31693_Ctg1_166	G	13	0.1625	0.00168359	0.0410316
GCR_cBin37684_Ctg1_202	A	67	0.8375	0.00168359	0.0410316
GCR_cBin37684_Ctg1_202	G	13	0.1625	0.00168359	0.0410316
GCR_cBin25358_Ctg1_191	A	15	0.1875	0.00146484	0.0382733
GCR_cBin25358_Ctg1_191	G	65	0.8125	0.00146484	0.0382733
GCR_cBin28563_Ctg1_122	A	16	0.2	0.002125	0.0460977
GCR_cBin28563_Ctg1_122	T	64	0.8	0.002125	0.0460977
GCR_cBin49901_Ctg1_37	A	54	0.675	0.00267188	0.0516902
GCR_cBin49901_Ctg1_37	G	26	0.325	0.00267188	0.0516902
ESTNV_18093_348	C	61	0.7625	0.00218359	0.0467289
ESTNV_18093_348	G	19	0.2375	0.00218359	0.0467289
GCR_cBin46142_Ctg1_191	A	38	0.475	0.00217188	0.0466034
GCR_cBin46142_Ctg1_191	G	42	0.525	0.00217188	0.0466034
ESTNV_32502_411	A	13	0.1625	0.00137109	0.0370283
ESTNV_32502_411	G	67	0.8375	0.00137109	0.0370283
ESTNV_28577_526	A	74	0.925	0.000796875	0.028229
ESTNV_28577_526	C	6	0.075	0.000796875	0.028229
ESTV_16640_186	C	60	0.75	0.0025	0.05
ESTV_16640_186	G	20	0.25	0.0025	0.05
BASS138_B7_G02_640	A	57	0.7125	0.00246484	0.0496472
BASS138_B7_G02_640	G	23	0.2875	0.00246484	0.0496472
GCR_hBin50784_Ctg1_70	A	35	0.4375	0.00318359	0.0564233
GCR_hBin50784_Ctg1_70	T	45	0.5625	0.00318359	0.0564233
GCR_cBin5629_Ctg1_134	A	48	0.6	0.0025625	0.0506211
GCR_cBin5629_Ctg1_134	C	32	0.4	0.0025625	0.0506211
ESTNV_36561_1246	G	80	1	0	0
ESTNV_27729_435	A	6	0.075	0.000796875	0.028229
ESTNV_27729_435	C	74	0.925	0.000796875	0.028229
ESTV_15528_560	A	13	0.1625	0.00137109	0.0370283
ESTV_15528_560	C	67	0.8375	0.00137109	0.0370283
ESTNV_16145_162	A	39	0.4875	0.00296484	0.0544504
ESTNV_16145_162	T	41	0.5125	0.00296484	0.0544504
ESTNV_33367_515	A	39	0.4875	0.00296484	0.0544504
ESTNV_33367_515	C	41	0.5125	0.00296484	0.0544504
GCR_cBin46269_Ctg1_130	C	11	0.1375	0.00124609	0.0353001
GCR_cBin46269_Ctg1_130	G	69	0.8625	0.00124609	0.0353001
ESTNV_35689_1120	G	80	1	0	0
ESTNV_33988_1757	A	66	0.825	0.00173438	0.0416458
ESTNV_33988_1757	G	14	0.175	0.00173438	0.0416458
ESTNV_33988_762	G	80	1	0	0
GCR_hBin32294_Ctg1_368	A	78	0.975	0.000296875	0.0172301
GCR_hBin32294_Ctg1_368	C	2	0.025	0.000296875	0.0172301
GCR_cBin3506_Ctg1_309	A	36	0.45	0.003375	0.0580948
GCR_cBin3506_Ctg1_309	G	44	0.55	0.003375	0.0580948
GCR_cBin21806_Ctg1_79	A	48	0.6	0.002875	0.053619
GCR_cBin21806_Ctg1_79	T	32	0.4	0.002875	0.053619
GCR_cBin32360_Ctg1_288	A	32	0.4	0.002875	0.053619
GCR_cBin32360_Ctg1_288	G	48	0.6	0.002875	0.053619
GCR_cBin3506_Ctg1_149	A	36	0.45	0.003375	0.0580948
GCR_cBin3506_Ctg1_149	C	44	0.55	0.003375	0.0580948
GCR_cBin15410_Ctg1_212	A	3	0.0375	0.000433594	0.0208229
GCR_cBin15410_Ctg1_212	C	77	0.9625	0.000433594	0.0208229
ESTNV_30819_535	A	13	0.1625	0.00199609	0.0446777
ESTNV_30819_535	C	67	0.8375	0.00199609	0.0446777
GCR_cBin13823_Ctg2_368	A	49	0.6125	0.00327734	0.0572481
GCR_cBin13823_Ctg2_368	G	31	0.3875	0.00327734	0.0572481
ESTV_16643_373	A	76	0.95	0.0005625	0.0237171
ESTV_16643_373	G	4	0.05	0.0005625	0.0237171
ESTV_16643_586	C	16	0.2	0.0024375	0.049371
ESTV_16643_586	G	64	0.8	0.0024375	0.049371
ESTV_20925_1105	A	42	0.525	0.00373437	0.0611095
ESTV_20925_1105	C	38	0.475	0.00373437	0.0611095
ESTNV_36918_790	A	42	0.525	0.00373437	0.0611095
ESTNV_36918_790	G	38	0.475	0.00373437	0.0611095
ESTNV_32393_853	A	71	0.8875	0.00140234	0.0374479
ESTNV_32393_853	G	9	0.1125	0.00140234	0.0374479
GCR_cBin4742_Ctg1_269	A	62	0.775	0.00185937	0.0431205
GCR_cBin4742_Ctg1_269	C	18	0.225	0.00185937	0.0431205
ESTNV_17126_935	A	52	0.65	0.0025625	0.0506211
ESTNV_17126_935	C	28	0.35	0.0025625	0.0506211
BASS139_B7_E01_105	A	2	0.025	0.000296875	0.0172301
BASS139_B7_E01_105	C	78	0.975	0.000296875	0.0172301
ESTNV_33917_998	A	76	0.95	0.0005625	0.0237171
ESTNV_33917_998	G	4	0.05	0.0005625	0.0237171
ESTNV_33917_1292	A	80	1	0	0
GCR_cBin15022_Ctg1_318	A	45	0.5625	0.00224609	0.047393
GCR_cBin15022_Ctg1_318	C	35	0.4375	0.00224609	0.047393
BASS140_B7_E09_126	A	49	0.6125	0.00296484	0.0544504
BASS140_B7_E09_126	C	31	0.3875	0.00296484	0.0544504
GCR_cBin27107_Ctg1_427	A	80	1	0	0
BASS140_B7_E09_544	A	28	0.35	0.0025625	0.0506211
BASS140_B7_E09_544	G	52	0.65	0.0025625	0.0506211
GCR_cBin4279_Ctg1_224	A	50	0.625	0.00273437	0.0522913
GCR_cBin4279_Ctg1_224	T	30	0.375	0.00273437	0.0522913
GCR_cBin28906_Ctg1_149	A	75	0.9375	0.000683594	0.0261456
GCR_cBin28906_Ctg1_149	G	5	0.0625	0.000683594	0.0261456
GCR_cBin42059_Ctg1_20	A	2	0.025	0.000296875	0.0172301
GCR_cBin42059_Ctg1_20	G	78	0.975	0.000296875	0.0172301
ESTV_16809_973	A	79	0.9875	0.000152344	0.0123428
ESTV_16809_973	G	1	0.0125	0.000152344	0.0123428
ESTNV_37616_3894	C	80	1	0	0
GCR_cBin9806_Ctg1_249	C	37	0.4625	0.00262109	0.0511966
GCR_cBin9806_Ctg1_249	G	43	0.5375	0.00262109	0.0511966
ESTV_13644_410	A	33	0.4125	0.00215234	0.0463934
ESTV_13644_410	G	47	0.5875	0.00215234	0.0463934
GCR_cBin9103_Ctg1_35	A	20	0.25	0.0021875	0.0467707
GCR_cBin9103_Ctg1_35	G	60	0.75	0.0021875	0.0467707
GCR_cBin1541_Ctg1_424	A	36	0.45	0.00275	0.0524404
GCR_cBin1541_Ctg1_424	G	44	0.55	0.00275	0.0524404
ESTNV_13516_123	A	61	0.7625	0.00187109	0.0432561
ESTNV_13516_123	T	19	0.2375	0.00187109	0.0432561
ESTNV_35567_72	A	49	0.6125	0.00233984	0.0483719
ESTNV_35567_72	G	31	0.3875	0.00233984	0.0483719
ESTNV_28966_1171	A	58	0.725	0.00217188	0.0466034
ESTNV_28966_1171	G	22	0.275	0.00217188	0.0466034
ESTNV_14764_458	A	78	0.975	0.000296875	0.0172301
ESTNV_14764_458	G	2	0.025	0.000296875	0.0172301
ESTNV_32717_1091	A	1	0.0125	0.000152344	0.0123428
ESTNV_32717_1091	C	79	0.9875	0.000152344	0.0123428
GCR_cBin51398_Ctg1_70	A	9	0.1125	0.00108984	0.0330128
GCR_cBin51398_Ctg1_70	C	71	0.8875	0.00108984	0.0330128
ESTNV_25398_289	A	76	0.95	0.0005625	0.0237171
ESTNV_25398_289	C	4	0.05	0.0005625	0.0237171
GCR_cBin36279_Ctg1_64	A	10	0.125	0.00117187	0.0342327
GCR_cBin36279_Ctg1_64	C	70	0.875	0.00117187	0.0342327
ESTNV_29240_385	A	39	0.4875	0.00233984	0.0483719
ESTNV_29240_385	C	41	0.5125	0.00233984	0.0483719
GCR_cBin6162_Ctg1_59	C	80	1	0	0
GCR_cBin16401_Ctg1_326	A	66	0.825	0.00142187	0.0377078
GCR_cBin16401_Ctg1_326	T	14	0.175	0.00142187	0.0377078
ESTNV_34931_121	A	80	1	0	0
GCR_cBin31415_Ctg1_119	A	54	0.675	0.00235937	0.0485734
GCR_cBin31415_Ctg1_119	T	26	0.325	0.00235937	0.0485734
GCR_cBin17319_Ctg1_126	A	21	0.2625	0.00218359	0.0467289
GCR_cBin17319_Ctg1_126	C	59	0.7375	0.00218359	0.0467289
GCR_cBin9564_Ctg1_161	A	11	0.1375	0.00124609	0.0353001
GCR_cBin9564_Ctg1_161	G	69	0.8625	0.00124609	0.0353001
GCR_cBin9732_Ctg1_64	C	63	0.7875	0.00183984	0.0428934
GCR_cBin9732_Ctg1_64	G	17	0.2125	0.00183984	0.0428934
GCR_cBin35021_Ctg1_70	A	2	0.025	0.000296875	0.0172301
GCR_cBin35021_Ctg1_70	C	78	0.975	0.000296875	0.0172301
GCR_cBin19394_Ctg1_156	A	22	0.275	0.00248438	0.0498435
GCR_cBin19394_Ctg1_156	G	58	0.725	0.00248438	0.0498435
GCR_cBin46118_Ctg1_223	A	80	1	0	0
GCR_cBin41876_Ctg1_108	G	80	1	0	0
GCR_cBin29958_Ctg1_84	A	44	0.55	0.002125	0.0460977
GCR_cBin29958_Ctg1_84	G	36	0.45	0.002125	0.0460977
ESTV_17539_1123	C	75	0.9375	0.000683594	0.0261456
ESTV_17539_1123	G	5	0.0625	0.000683594	0.0261456
GCR_cBin12278_Ctg1_153	A	51	0.6375	0.00218359	0.0467289
GCR_cBin12278_Ctg1_153	G	29	0.3625	0.00218359	0.0467289
ESTNV_33422_864	A	40	0.5	0.00375	0.0612372
ESTNV_33422_864	T	40	0.5	0.00375	0.0612372
GCR_cBin15028_Ctg1_199	A	78	0.975	0.000296875	0.0172301
GCR_cBin15028_Ctg1_199	C	2	0.025	0.000296875	0.0172301
ESTV_15187_371	A	1	0.0125	0.000152344	0.0123428
ESTV_15187_371	G	79	0.9875	0.000152344	0.0123428
ESTNV_28503_575	A	80	1	0	0
ESTNV_28503_327	A	80	1	0	0
GCR_cBin9428_Ctg1_32	C	80	1	0	0
ESTNV_36230_1120	A	21	0.2625	0.00218359	0.0467289
ESTNV_36230_1120	G	59	0.7375	0.00218359	0.0467289
ESTV_17202_480	A	41	0.5125	0.00327734	0.0572481
ESTV_17202_480	C	39	0.4875	0.00327734	0.0572481
ESTNV_30258_90	A	61	0.7625	0.00218359	0.0467289
ESTNV_30258_90	T	19	0.2375	0.00218359	0.0467289
GCR_cBin37930_Ctg1_88	A	45	0.5625	0.00193359	0.0439726
GCR_cBin37930_Ctg1_88	G	35	0.4375	0.00193359	0.0439726
GCR_cBin7082_Ctg1_204	A	50	0.625	0.00242187	0.0492125
GCR_cBin7082_Ctg1_204	G	30	0.375	0.00242187	0.0492125
ESTNV_34419_496	C	48	0.6	0.002875	0.053619
ESTNV_34419_496	G	32	0.4	0.002875	0.053619
ESTNV_34833_1382	A	79	0.9875	0.000152344	0.0123428
ESTNV_34833_1382	C	1	0.0125	0.000152344	0.0123428
ESTNV_35650_2037	A	40	0.5	0.0025	0.05
ESTNV_35650_2037	C	40	0.5	0.0025	0.05
GCR_cBin19287_Ctg1_252	A	74	0.925	0.000796875	0.028229
GCR_cBin19287_Ctg1_252	G	6	0.075	0.000796875	0.028229
ESTNV_35635_2078	A	61	0.7625	0.00218359	0.0467289
ESTNV_35635_2078	C	19	0.2375	0.00218359	0.0467289
GCR_hBin6632_Ctg1_121	A	19	0.2375	0.00218359	0.0467289
GCR_hBin6632_Ctg1_121	C	61	0.7625	0.00218359	0.0467289
BASS112_B7_A12_127	A	80	1	0	0
BASS112_B7_A12_395	G	80	1	0	0
ESTNV_36511_141	A	16	0.2	0.002125	0.0460977
ESTNV_36511_141	G	64	0.8	0.002125	0.0460977
ESTV_13197_590	A	36	0.45	0.003375	0.0580948
ESTV_13197_590	C	44	0.55	0.003375	0.0580948
GCR_cBin4805_Ctg1_193	A	43	0.5375	0.00293359	0.0541627
GCR_cBin4805_Ctg1_193	G	37	0.4625	0.00293359	0.0541627
ESTNV_35329_908	C	74	0.925	0.000796875	0.028229
ESTNV_35329_908	G	6	0.075	0.000796875	0.028229
ESTNV_35352_241	A	74	0.925	0.000796875	0.028229
ESTNV_35352_241	G	6	0.075	0.000796875	0.028229
ESTNV_35352_77	A	6	0.075	0.000796875	0.028229
ESTNV_35352_77	C	74	0.925	0.000796875	0.028229
ESTNV_35329_232	A	6	0.075	0.000796875	0.028229
ESTNV_35329_232	G	74	0.925	0.000796875	0.028229
GCR_cBin2433_Ctg1_97	A	78	0.975	0.000296875	0.0172301
GCR_cBin2433_Ctg1_97	G	2	0.025	0.000296875	0.0172301
ESTV_16979_565	A	73	0.9125	0.000902344	0.030039
ESTV_16979_565	G	7	0.0875	0.000902344	0.030039
ESTNV_33016_564	A	80	1	0	0
GCR_cBin568_Ctg1_74	A	73	0.9125	0.000902344	0.030039
GCR_cBin568_Ctg1_74	C	7	0.0875	0.000902344	0.030039
GCR_cBin3044_Ctg1_47	C	70	0.875	0.00148438	0.0385276
GCR_cBin3044_Ctg1_47	G	10	0.125	0.00148438	0.0385276
GCR_hBin45092_Ctg1_140	A	61	0.7625	0.00249609	0.0499609
GCR_hBin45092_Ctg1_140	T	19	0.2375	0.00249609	0.0499609
GCR_hBin45092_Ctg1_57	A	63	0.7875	0.00215234	0.0463934
GCR_hBin45092_Ctg1_57	G	17	0.2125	0.00215234	0.0463934
GCR_cBin16144_Ctg1_285	A	5	0.0625	0.000683594	0.0261456
GCR_cBin16144_Ctg1_285	G	75	0.9375	0.000683594	0.0261456
GCR_cBin17565_Ctg1_349	C	50	0.625	0.00335937	0.0579601
GCR_cBin17565_Ctg1_349	G	30	0.375	0.00335937	0.0579601
GCR_cBin17565_Ctg1_401	A	57	0.7125	0.00246484	0.0496472
GCR_cBin17565_Ctg1_401	G	23	0.2875	0.00246484	0.0496472
GCR_cBin1635_Ctg1_70	A	28	0.35	0.0019375	0.044017
GCR_cBin1635_Ctg1_70	T	52	0.65	0.0019375	0.044017
ESTNV_34623_1031	A	37	0.4625	0.00230859	0.0480478
ESTNV_34623_1031	G	43	0.5375	0.00230859	0.0480478
GCR_cBin9253_Ctg1_169	A	13	0.1625	0.00137109	0.0370283
GCR_cBin9253_Ctg1_169	C	67	0.8375	0.00137109	0.0370283
ESTNV_35547_1444	A	1	0.0125	0.000152344	0.0123428
ESTNV_35547_1444	G	79	0.9875	0.000152344	0.0123428
ESTNV_30983_1638	A	64	0.8	0.0015	0.0387298
ESTNV_30983_1638	G	16	0.2	0.0015	0.0387298
ESTNV_28895_687	C	80	1	0	0
ESTNV_36086_719	C	5	0.0625	0.000683594	0.0261456
ESTNV_36086_719	G	75	0.9375	0.000683594	0.0261456
ESTNV_35503_345	A	25	0.3125	0.00240234	0.0490137
ESTNV_35503_345	G	55	0.6875	0.00240234	0.0490137
ESTNV_35503_827	C	55	0.6875	0.00240234	0.0490137
ESTNV_35503_827	G	25	0.3125	0.00240234	0.0490137
ESTNV_32703_428	A	66	0.825	0.00142187	0.0377078
ESTNV_32703_428	G	14	0.175	0.00142187	0.0377078
ESTNV_32703_647	A	66	0.825	0.00142187	0.0377078
ESTNV_32703_647	T	14	0.175	0.00142187	0.0377078
ESTNV_28129_298	A	80	1	0	0
ESTNV_37656_1100	A	80	1	0	0
ESTV_21187_191	A	8	0.1	0.001	0.0316228
ESTV_21187_191	G	72	0.9	0.001	0.0316228
ESTV_21697_1223	A	67	0.8375	0.00199609	0.0446777
ESTV_21697_1223	G	13	0.1625	0.00199609	0.0446777
ESTV_21801_199	A	80	1	0	0
ESTNV_22829_341	A	39	0.4875	0.00327734	0.0572481
ESTNV_22829_341	C	41	0.5125	0.00327734	0.0572481
GCR_cBin8515_Ctg1_191	C	80	1	0	0
GCR_cBin40624_Ctg1_148	A	39	0.4875	0.00296484	0.0544504
GCR_cBin40624_Ctg1_148	G	41	0.5125	0.00296484	0.0544504
GCR_cBin33417_Ctg1_101	G	80	1	0	0
ESTV_11377_108	A	17	0.2125	0.00215234	0.0463934
ESTV_11377_108	G	63	0.7875	0.00215234	0.0463934
ESTNV_21396_116	A	12	0.15	0.0019375	0.044017
ESTNV_21396_116	G	68	0.85	0.0019375	0.044017
GCR_cBin41869_Ctg1_110	A	77	0.9625	0.000433594	0.0208229
GCR_cBin41869_Ctg1_110	G	3	0.0375	0.000433594	0.0208229
ESTNV_31747_532	G	80	1	0	0
ESTV_16743_404	A	8	0.1	0.001	0.0316228
ESTV_16743_404	G	72	0.9	0.001	0.0316228
ESTV_20625_51	A	26	0.325	0.00298438	0.0546294
ESTV_20625_51	C	54	0.675	0.00298438	0.0546294
ESTNV_20180_573	A	55	0.6875	0.00302734	0.0550213
ESTNV_20180_573	G	25	0.3125	0.00302734	0.0550213
ESTNV_34353_55	A	9	0.121622	0.00160899	0.0401122
ESTNV_34353_55	T	65	0.878378	0.00160899	0.0401122
GCR_cBin6795_Ctg1_308	A	27	0.3375	0.00230859	0.0480478
GCR_cBin6795_Ctg1_308	G	53	0.6625	0.00230859	0.0480478
ESTV_21892_327	C	78	0.975	0.000296875	0.0172301
ESTV_21892_327	G	2	0.025	0.000296875	0.0172301
GCR_cBin17748_Ctg1_51	C	80	1	0	0
ESTNV_35314_130	C	36	0.45	0.00275	0.0524404
ESTNV_35314_130	G	44	0.55	0.00275	0.0524404
ESTNV_34464_1404	A	6	0.075	0.000796875	0.028229
ESTNV_34464_1404	G	74	0.925	0.000796875	0.028229
GCR_cBin4170_Ctg1_233	A	41	0.5125	0.00296484	0.0544504
GCR_cBin4170_Ctg1_233	C	39	0.4875	0.00296484	0.0544504
GCR_cBin4170_Ctg1_228	A	39	0.4875	0.00296484	0.0544504
GCR_cBin4170_Ctg1_228	G	41	0.5125	0.00296484	0.0544504
GCR_cBin5339_Ctg1_208	A	28	0.35	0.0035	0.0591608
GCR_cBin5339_Ctg1_208	G	52	0.65	0.0035	0.0591608
ESTNV_26088_606	C	50	0.625	0.00242187	0.0492125
ESTNV_26088_606	G	30	0.375	0.00242187	0.0492125
GCR_cBin16885_Ctg1_348	A	4	0.05	0.0005625	0.0237171
GCR_cBin16885_Ctg1_348	C	76	0.95	0.0005625	0.0237171
GCR_cBin24218_Ctg1_261	A	76	0.95	0.0005625	0.0237171
GCR_cBin24218_Ctg1_261	C	4	0.05	0.0005625	0.0237171
BASS136_B7_E01_171	A	65	0.8125	0.00208984	0.0457148
BASS136_B7_E01_171	G	15	0.1875	0.00208984	0.0457148
ESTV_12417_100	A	28	0.35	0.0035	0.0591608
ESTV_12417_100	G	52	0.65	0.0035	0.0591608
GCR_cBin4908_Ctg1_226	A	61	0.7625	0.00312109	0.0558667
GCR_cBin4908_Ctg1_226	G	19	0.2375	0.00312109	0.0558667
GCR_cBin10777_Ctg1_196	A	4	0.05	0.0005625	0.0237171
GCR_cBin10777_Ctg1_196	G	76	0.95	0.0005625	0.0237171
ESTV_12417_208	A	28	0.35	0.0035	0.0591608
ESTV_12417_208	C	52	0.65	0.0035	0.0591608
ESTV_16934_1328	G	80	1	0	0
ESTV_16934_1568	C	80	1	0	0
GCR_cBin13949_Ctg1_125	A	52	0.65	0.0025625	0.0506211
GCR_cBin13949_Ctg1_125	G	28	0.35	0.0025625	0.0506211
ESTNV_30017_552	A	20	0.25	0.0021875	0.0467707
ESTNV_30017_552	C	60	0.75	0.0021875	0.0467707
GCR_cBin4585_Ctg1_148	A	72	0.9	0.0013125	0.0362284
GCR_cBin4585_Ctg1_148	G	8	0.1	0.0013125	0.0362284
ESTNV_30017_158	A	20	0.25	0.0021875	0.0467707
ESTNV_30017_158	T	60	0.75	0.0021875	0.0467707
GCR_cBin44859_Ctg1_254	A	80	1	0	0
GCR_cBin14217_Ctg1_414	A	65	0.8125	0.00177734	0.0421586
GCR_cBin14217_Ctg1_414	G	15	0.1875	0.00177734	0.0421586
ESTNV_35114_720	T	80	1	0	0
ESTV_15386_484	A	4	0.05	0.0005625	0.0237171
ESTV_15386_484	G	76	0.95	0.0005625	0.0237171
GCR_cBin44030_Ctg1_237	A	52	0.65	0.00225	0.0474342
GCR_cBin44030_Ctg1_237	G	28	0.35	0.00225	0.0474342
GCR_cBin992_Ctg1_309	A	80	1	0	0
GCR_cBin25010_Ctg1_148	A	77	0.9625	0.000433594	0.0208229
GCR_cBin25010_Ctg1_148	T	3	0.0375	0.000433594	0.0208229
GCR_hBin10171_Ctg1_182	C	47	0.5875	0.00371484	0.0609495
GCR_hBin10171_Ctg1_182	G	33	0.4125	0.00371484	0.0609495
GCR_cBin11431_Ctg1_401	A	57	0.7125	0.00277734	0.0527005
GCR_cBin11431_Ctg1_401	G	23	0.2875	0.00277734	0.0527005
ESTNV_25792_446	A	71	0.8875	0.00108984	0.0330128
ESTNV_25792_446	G	9	0.1125	0.00108984	0.0330128
ESTNV_25792_698	A	9	0.1125	0.00108984	0.0330128
ESTNV_25792_698	G	71	0.8875	0.00108984	0.0330128
ESTNV_23515_266	A	16	0.2	0.0018125	0.0425735
ESTNV_23515_266	C	64	0.8	0.0018125	0.0425735
ESTV_15402_87	A	53	0.679487	0.00377619	0.0614507
ESTV_15402_87	T	25	0.320513	0.00377619	0.0614507
ESTNV_25525_410	A	17	0.2125	0.00277734	0.0527005
ESTNV_25525_410	G	63	0.7875	0.00277734	0.0527005
GCR_cBin12379_Ctg1_94	C	44	0.55	0.0018125	0.0425735
GCR_cBin12379_Ctg1_94	G	36	0.45	0.0018125	0.0425735
GCR_cBin39590_Ctg1_87	C	58	0.725	0.00217188	0.0466034
GCR_cBin39590_Ctg1_87	G	22	0.275	0.00217188	0.0466034
ESTNV_36346_1426	G	80	1	0	0
GCR_cBin29880_Ctg1_23	A	24	0.3	0.002125	0.0460977
GCR_cBin29880_Ctg1_23	C	56	0.7	0.002125	0.0460977
ESTNV_13974_873	C	62	0.775	0.00279687	0.0528855
ESTNV_13974_873	G	18	0.225	0.00279687	0.0528855
GCR_cBin26310_Ctg1_189	A	79	0.9875	0.000152344	0.0123428
GCR_cBin26310_Ctg1_189	C	1	0.0125	0.000152344	0.0123428
GCR_cBin18612_Ctg1_67	G	80	1	0	0
ESTNV_36358_242	A	77	0.9625	0.000433594	0.0208229
ESTNV_36358_242	G	3	0.0375	0.000433594	0.0208229
ESTV_14645_361	A	2	0.025	0.000296875	0.0172301
ESTV_14645_361	C	78	0.975	0.000296875	0.0172301
ESTV_14645_221	G	80	1	0	0
ESTNV_31662_122	A	77	0.9625	0.000433594	0.0208229
ESTNV_31662_122	T	3	0.0375	0.000433594	0.0208229
GCR_cBin37721_Ctg1_160	G	80	1	0	0
ESTNV_32316_1197	C	72	0.9	0.001	0.0316228
ESTNV_32316_1197	G	8	0.1	0.001	0.0316228
GCR_cBin20050_Ctg1_34	A	47	0.5875	0.00340234	0.0583296
GCR_cBin20050_Ctg1_34	C	33	0.4125	0.00340234	0.0583296
GCR_cBin27614_Ctg1_152	A	78	0.975	0.000296875	0.0172301
GCR_cBin27614_Ctg1_152	T	2	0.025	0.000296875	0.0172301
GCR_cBin31420_Ctg1_20	G	80	1	0	0
GCR_cBin7487_Ctg1_102	A	36	0.45	0.003375	0.0580948
GCR_cBin7487_Ctg1_102	G	44	0.55	0.003375	0.0580948
ESTV_17368_88	A	73	0.9125	0.000902344	0.030039
ESTV_17368_88	G	7	0.0875	0.000902344	0.030039
ESTV_14503_197	A	16	0.2	0.0018125	0.0425735
ESTV_14503_197	C	64	0.8	0.0018125	0.0425735
ESTNV_34237_82	A	63	0.7875	0.00183984	0.0428934
ESTNV_34237_82	C	17	0.2125	0.00183984	0.0428934
GCR_cBin13024_Ctg1_175	G	80	1	0	0
GCR_cBin13024_Ctg1_142	A	21	0.2625	0.00155859	0.039479
GCR_cBin13024_Ctg1_142	G	59	0.7375	0.00155859	0.039479
GCR_cBin13024_Ctg1_140	A	21	0.2625	0.00155859	0.039479
GCR_cBin13024_Ctg1_140	C	59	0.7375	0.00155859	0.039479
GCR_cBin34183_Ctg1_158	A	4	0.05	0.0005625	0.0237171
GCR_cBin34183_Ctg1_158	C	76	0.95	0.0005625	0.0237171
GCR_cBin34183_Ctg1_159	A	76	0.95	0.0005625	0.0237171
GCR_cBin34183_Ctg1_159	C	4	0.05	0.0005625	0.0237171
GCR_cBin42808_Ctg1_202	A	60	0.75	0.0028125	0.053033
GCR_cBin42808_Ctg1_202	G	20	0.25	0.0028125	0.053033
GCR_cBin6567_Ctg1_114	A	63	0.7875	0.00215234	0.0463934
GCR_cBin6567_Ctg1_114	T	17	0.2125	0.00215234	0.0463934
BASS111_B7_D03_407	A	1	0.0128205	0.000160151	0.0126551
BASS111_B7_D03_407	C	77	0.987179	0.000160151	0.0126551
GCR_hBin39311_Ctg1_131	C	69	0.8625	0.00124609	0.0353001
GCR_hBin39311_Ctg1_131	G	11	0.1375	0.00124609	0.0353001
ESTNV_36502_836	A	30	0.375	0.00304688	0.0551985
ESTNV_36502_836	G	50	0.625	0.00304688	0.0551985
BASS111_B7_D03_286	A	33	0.4125	0.00277734	0.0527005
BASS111_B7_D03_286	C	47	0.5875	0.00277734	0.0527005
BASS111_B7_D03_328	A	33	0.4125	0.00277734	0.0527005
BASS111_B7_D03_328	G	47	0.5875	0.00277734	0.0527005
GCR_hBin33430_Ctg1_182	C	34	0.425	0.00298438	0.0546294
GCR_hBin33430_Ctg1_182	G	46	0.575	0.00298438	0.0546294
GCR_cBin30182_Ctg1_141	A	48	0.6	0.0035	0.0591608
GCR_cBin30182_Ctg1_141	T	32	0.4	0.0035	0.0591608
ESTV_21750_731	A	78	0.975	0.000296875	0.0172301
ESTV_21750_731	T	2	0.025	0.000296875	0.0172301
ESTNV_35044_125	A	27	0.3375	0.00293359	0.0541627
ESTNV_35044_125	G	53	0.6625	0.00293359	0.0541627
GCR_cBin17727_Ctg1_27	A	2	0.025	0.000296875	0.0172301
GCR_cBin17727_Ctg1_27	G	78	0.975	0.000296875	0.0172301
ESTV_15078_479	A	24	0.3	0.002125	0.0460977
ESTV_15078_479	C	56	0.7	0.002125	0.0460977
ESTV_15770_410	C	26	0.325	0.00267188	0.0516902
ESTV_15770_410	G	54	0.675	0.00267188	0.0516902
GCR_cBin20239_Ctg1_63	A	70	0.875	0.00148438	0.0385276
GCR_cBin20239_Ctg1_63	G	10	0.125	0.00148438	0.0385276
GCR_cBin19361_Ctg1_96	A	32	0.4	0.0025625	0.0506211
GCR_cBin19361_Ctg1_96	C	48	0.6	0.0025625	0.0506211
ESTNV_20218_62	A	65	0.8125	0.00177734	0.0421586
ESTNV_20218_62	G	15	0.1875	0.00177734	0.0421586
GCR_cBin37707_Ctg1_102	A	76	0.95	0.0005625	0.0237171
GCR_cBin37707_Ctg1_102	G	4	0.05	0.0005625	0.0237171
ESTNV_35887_1036	C	80	1	0	0
GCR_cBin13496_Ctg1_388	A	72	0.9	0.0013125	0.0362284
GCR_cBin13496_Ctg1_388	G	8	0.1	0.0013125	0.0362284
GCR_cBin6985_Ctg1_265	G	80	1	0	0
GCR_cBin5116_Ctg1_343	A	70	0.875	0.00117187	0.0342327
GCR_cBin5116_Ctg1_343	C	10	0.125	0.00117187	0.0342327
ESTNV_31531_916	A	77	0.9625	0.000433594	0.0208229
ESTNV_31531_916	G	3	0.0375	0.000433594	0.0208229
ESTV_18386_118	A	79	0.9875	0.000152344	0.0123428
ESTV_18386_118	G	1	0.0125	0.000152344	0.0123428
ESTV_18386_82	C	79	0.9875	0.000152344	0.0123428
ESTV_18386_82	G	1	0.0125	0.000152344	0.0123428
GCR_cBin4421_Ctg1_345	A	75	0.9375	0.000996094	0.031561
GCR_cBin4421_Ctg1_345	G	5	0.0625	0.000996094	0.031561
GCR_cBin4421_Ctg1_196	A	5	0.0625	0.000996094	0.031561
GCR_cBin4421_Ctg1_196	C	75	0.9375	0.000996094	0.031561
GCR_cBin33212_Ctg1_226	A	23	0.2875	0.00246484	0.0496472
GCR_cBin33212_Ctg1_226	C	57	0.7125	0.00246484	0.0496472
ESTNV_35525_1387	A	11	0.1375	0.00124609	0.0353001
ESTNV_35525_1387	G	69	0.8625	0.00124609	0.0353001
GCR_cBin793_Ctg1_69	A	60	0.75	0.001875	0.0433013
GCR_cBin793_Ctg1_69	G	20	0.25	0.001875	0.0433013
ESTNV_19126_343	G	80	1	0	0
ESTNV_19750_154	C	80	1	0	0
ESTV_16188_156	A	36	0.45	0.003375	0.0580948
ESTV_16188_156	G	44	0.55	0.003375	0.0580948
ESTNV_33045_743	C	2	0.025	0.000296875	0.0172301
ESTNV_33045_743	G	78	0.975	0.000296875	0.0172301
ESTV_16466_1044	A	78	0.975	0.000296875	0.0172301
ESTV_16466_1044	C	2	0.025	0.000296875	0.0172301
ESTNV_22986_1059	A	33	0.4125	0.00277734	0.0527005
ESTNV_22986_1059	G	47	0.5875	0.00277734	0.0527005
ESTV_16965_617	G	80	1	0	0
ESTNV_24241_102	A	3	0.0375	0.000433594	0.0208229
ESTNV_24241_102	C	77	0.9625	0.000433594	0.0208229
GCR_hBin16599_Ctg1_79	A	46	0.575	0.00267188	0.0516902
GCR_hBin16599_Ctg1_79	C	34	0.425	0.00267188	0.0516902
ESTV_16604_550	A	36	0.45	0.003375	0.0580948
ESTV_16604_550	C	44	0.55	0.003375	0.0580948
GCR_cBin6090_Ctg1_166	C	80	1	0	0
ESTNV_14000_405	A	2	0.025	0.000296875	0.0172301
ESTNV_14000_405	G	78	0.975	0.000296875	0.0172301
GCR_cBin965_Ctg2_341	A	21	0.2625	0.00187109	0.0432561
GCR_cBin965_Ctg2_341	G	59	0.7375	0.00187109	0.0432561
GCR_cBin965_Ctg2_356	A	12	0.15	0.0013125	0.0362284
GCR_cBin965_Ctg2_356	C	68	0.85	0.0013125	0.0362284
ESTNV_14089_241	A	78	0.975	0.000296875	0.0172301
ESTNV_14089_241	G	2	0.025	0.000296875	0.0172301
ESTNV_29295_468	A	62	0.775	0.00154688	0.0393303
ESTNV_29295_468	C	18	0.225	0.00154688	0.0393303
ESTV_13454_78	A	71	0.8875	0.00108984	0.0330128
ESTV_13454_78	C	9	0.1125	0.00108984	0.0330128
ESTNV_30013_731	A	78	0.975	0.000296875	0.0172301
ESTNV_30013_731	C	2	0.025	0.000296875	0.0172301
GCR_cBin2972_Ctg1_58	A	6	0.075	0.000796875	0.028229
GCR_cBin2972_Ctg1_58	G	74	0.925	0.000796875	0.028229
ESTV_14757_562	A	34	0.425	0.00267188	0.0516902
ESTV_14757_562	G	46	0.575	0.00267188	0.0516902
ESTNV_33128_78	A	1	0.0125	0.000152344	0.0123428
ESTNV_33128_78	C	79	0.9875	0.000152344	0.0123428
ESTV_14757_521	A	46	0.575	0.00267188	0.0516902
ESTV_14757_521	G	34	0.425	0.00267188	0.0516902
ESTNV_33128_565	A	79	0.9875	0.000152344	0.0123428
ESTNV_33128_565	G	1	0.0125	0.000152344	0.0123428
BASS123_B7_B04_360	A	4	0.05	0.0005625	0.0237171
BASS123_B7_B04_360	G	76	0.95	0.0005625	0.0237171
ESTV_10850_97	A	20	0.25	0.001875	0.0433013
ESTV_10850_97	C	60	0.75	0.001875	0.0433013
ESTNV_23683_596	A	22	0.275	0.00185937	0.0431205
ESTNV_23683_596	T	58	0.725	0.00185937	0.0431205
GCR_cBin30866_Ctg1_113	A	64	0.8	0.0018125	0.0425735
GCR_cBin30866_Ctg1_113	C	16	0.2	0.0018125	0.0425735
ESTNV_37477_1100	A	11	0.1375	0.00155859	0.039479
ESTNV_37477_1100	G	69	0.8625	0.00155859	0.039479
GCR_cBin6066_Ctg1_86	C	80	1	0	0
ESTNV_37607_394	C	24	0.3	0.00275	0.0524404
ESTNV_37607_394	G	56	0.7	0.00275	0.0524404
GCR_cBin37571_Ctg1_142	A	71	0.8875	0.00140234	0.0374479
GCR_cBin37571_Ctg1_142	G	9	0.1125	0.00140234	0.0374479
GCR_hBin31975_Ctg1_231	A	7	0.0875	0.000902344	0.030039
GCR_hBin31975_Ctg1_231	G	73	0.9125	0.000902344	0.030039
GCR_cBin4660_Ctg1_268	A	13	0.1625	0.00168359	0.0410316
GCR_cBin4660_Ctg1_268	G	67	0.8375	0.00168359	0.0410316
GCR_cBin12244_Ctg1_232	A	68	0.85	0.001625	0.0403113
GCR_cBin12244_Ctg1_232	T	12	0.15	0.001625	0.0403113
GCR_cBin26088_Ctg1_476	A	8	0.1	0.001	0.0316228
[truncated: 6,735 more rows]

## Sheet: BA_Tor
File S1. SNP allele frequencies per population. LL_SYS
SNP_ID	Allele	Count	Frequency	Variance	SD
GCR_cBin24032_Ctg1_76	A	1	0.0128205	0.000160151	0.0126551
GCR_cBin24032_Ctg1_76	T	77	0.987179	0.000160151	0.0126551
GCR_cBin13749_Ctg1_18	A	23	0.2875	0.00183984	0.0428934
GCR_cBin13749_Ctg1_18	C	57	0.7125	0.00183984	0.0428934
ESTNV_28684_665	A	80	1	0	0
GCR_cBin32777_Ctg1_66	C	55	0.6875	0.00240234	0.0490137
GCR_cBin32777_Ctg1_66	G	25	0.3125	0.00240234	0.0490137
GCR_cBin13749_Ctg1_171	A	78	0.975	0.000296875	0.0172301
GCR_cBin13749_Ctg1_171	G	2	0.025	0.000296875	0.0172301
GCR_cBin22083_Ctg1_38	A	48	0.6	0.001625	0.0403113
GCR_cBin22083_Ctg1_38	C	32	0.4	0.001625	0.0403113
GCR_cBin7800_Ctg1_739	A	51	0.6375	0.00312109	0.0558667
GCR_cBin7800_Ctg1_739	T	29	0.3625	0.00312109	0.0558667
ESTV_16768_432	A	51	0.6375	0.00249609	0.0499609
ESTV_16768_432	T	29	0.3625	0.00249609	0.0499609
GCR_cBin42907_Ctg1_150	C	22	0.275	0.00248438	0.0498435
GCR_cBin42907_Ctg1_150	G	58	0.725	0.00248438	0.0498435
GCR_rBin14981_Ctg1_193	A	70	0.875	0.00117187	0.0342327
GCR_rBin14981_Ctg1_193	C	10	0.125	0.00117187	0.0342327
ESTNV_26586_283	A	46	0.575	0.00329687	0.0574184
ESTNV_26586_283	T	34	0.425	0.00329687	0.0574184
ESTNV_34251_1165	G	80	1	0	0
ESTNV_34453_617	A	54	0.675	0.00235937	0.0485734
ESTNV_34453_617	G	26	0.325	0.00235937	0.0485734
GCR_cBin5720_Ctg1_153	C	70	0.875	0.00148438	0.0385276
GCR_cBin5720_Ctg1_153	G	10	0.125	0.00148438	0.0385276
ESTV_13344_491	A	75	0.9375	0.000683594	0.0261456
ESTV_13344_491	C	5	0.0625	0.000683594	0.0261456
ESTNV_32810_1998	A	5	0.0625	0.000683594	0.0261456
ESTNV_32810_1998	C	75	0.9375	0.000683594	0.0261456
ESTV_12810_403	A	24	0.3	0.0030625	0.0553399
ESTV_12810_403	G	56	0.7	0.0030625	0.0553399
ESTV_12810_361	A	24	0.3	0.0030625	0.0553399
ESTV_12810_361	G	56	0.7	0.0030625	0.0553399
ESTNV_30347_550	A	24	0.3	0.0030625	0.0553399
ESTNV_30347_550	T	56	0.7	0.0030625	0.0553399
ESTNV_27471_81	A	47	0.5875	0.00340234	0.0583296
ESTNV_27471_81	G	33	0.4125	0.00340234	0.0583296
GCR_cBin23673_Ctg1_272	A	51	0.6375	0.00374609	0.0612053
GCR_cBin23673_Ctg1_272	G	29	0.3625	0.00374609	0.0612053
GCR_cBin49919_Ctg1_51	A	1	0.0125	0.000152344	0.0123428
GCR_cBin49919_Ctg1_51	C	79	0.9875	0.000152344	0.0123428
GCR_cBin3018_Ctg1_120	A	80	1	0	0
GCR_cBin3018_Ctg1_570	A	80	1	0	0
GCR_cBin3018_Ctg1_511	G	80	1	0	0
GCR_cBin8091_Ctg1_197	A	56	0.7	0.002125	0.0460977
GCR_cBin8091_Ctg1_197	T	24	0.3	0.002125	0.0460977
GCR_cBin8091_Ctg1_368	A	80	1	0	0
GCR_cBin38678_Ctg1_119	A	50	0.625	0.00398438	0.0631219
GCR_cBin38678_Ctg1_119	G	30	0.375	0.00398438	0.0631219
GCR_cBin26178_Ctg1_157	A	14	0.175	0.00173438	0.0416458
GCR_cBin26178_Ctg1_157	T	66	0.825	0.00173438	0.0416458
ESTNV_35287_375	A	10	0.125	0.00117187	0.0342327
ESTNV_35287_375	G	70	0.875	0.00117187	0.0342327
ESTNV_32999_885	A	36	0.45	0.003375	0.0580948
ESTNV_32999_885	G	44	0.55	0.003375	0.0580948
ESTV_13371_209	A	1	0.0125	0.000152344	0.0123428
ESTV_13371_209	C	79	0.9875	0.000152344	0.0123428
ESTNV_20700_631	A	43	0.5375	0.00355859	0.0596539
ESTNV_20700_631	G	37	0.4625	0.00355859	0.0596539
ESTNV_34751_1764	A	43	0.5375	0.00324609	0.0569745
ESTNV_34751_1764	C	37	0.4625	0.00324609	0.0569745
ESTNV_34751_1633	A	43	0.5375	0.00324609	0.0569745
ESTNV_34751_1633	G	37	0.4625	0.00324609	0.0569745
GCR_cBin4736_Ctg1_83	A	19	0.2375	0.00218359	0.0467289
GCR_cBin4736_Ctg1_83	G	61	0.7625	0.00218359	0.0467289
ESTNV_35283_192	A	11	0.1375	0.00155859	0.039479
ESTNV_35283_192	C	69	0.8625	0.00155859	0.039479
GCR_cBin30159_Ctg1_115	A	79	0.9875	0.000152344	0.0123428
GCR_cBin30159_Ctg1_115	G	1	0.0125	0.000152344	0.0123428
GCR_cBin20874_Ctg1_187	A	66	0.825	0.00173438	0.0416458
GCR_cBin20874_Ctg1_187	G	14	0.175	0.00173438	0.0416458
GCR_cBin7930_Ctg1_81	A	65	0.8125	0.00177734	0.0421586
GCR_cBin7930_Ctg1_81	G	15	0.1875	0.00177734	0.0421586
GCR_cBin12902_Ctg1_491	A	74	0.925	0.000796875	0.028229
GCR_cBin12902_Ctg1_491	G	6	0.075	0.000796875	0.028229
ESTNV_32983_812	A	34	0.425	0.00298438	0.0546294
ESTNV_32983_812	G	46	0.575	0.00298438	0.0546294
ESTV_11898_329	A	30	0.375	0.00273437	0.0522913
ESTV_11898_329	G	50	0.625	0.00273437	0.0522913
ESTV_11898_340	A	4	0.05	0.0005625	0.0237171
ESTV_11898_340	C	76	0.95	0.0005625	0.0237171
ESTNV_26718_947	A	24	0.3	0.00275	0.0524404
ESTNV_26718_947	G	56	0.7	0.00275	0.0524404
ESTV_16673_1575	A	18	0.225	0.00154688	0.0393303
ESTV_16673_1575	G	62	0.775	0.00154688	0.0393303
GCR_cBin47076_Ctg1_116	A	25	0.3125	0.00333984	0.0577914
GCR_cBin47076_Ctg1_116	G	55	0.6875	0.00333984	0.0577914
GCR_cBin38737_Ctg1_101	A	36	0.45	0.0036875	0.0607248
GCR_cBin38737_Ctg1_101	G	44	0.55	0.0036875	0.0607248
GCR_cBin29198_Ctg1_37	A	52	0.65	0.0035	0.0591608
GCR_cBin29198_Ctg1_37	C	28	0.35	0.0035	0.0591608
GCR_cBin31010_Ctg1_231	A	13	0.1625	0.00168359	0.0410316
GCR_cBin31010_Ctg1_231	C	67	0.8375	0.00168359	0.0410316
GCR_cBin42440_Ctg1_139	A	77	0.9625	0.000746094	0.0273147
GCR_cBin42440_Ctg1_139	G	3	0.0375	0.000746094	0.0273147
ESTNV_32327_914	A	41	0.5125	0.00296484	0.0544504
ESTNV_32327_914	G	39	0.4875	0.00296484	0.0544504
GCR_hBin38301_Ctg1_117	A	5	0.0625	0.000683594	0.0261456
GCR_hBin38301_Ctg1_117	T	75	0.9375	0.000683594	0.0261456
ESTV_16226_67	A	22	0.289474	0.00298877	0.0546697
ESTV_16226_67	G	54	0.710526	0.00298877	0.0546697
GCR_cBin8657_Ctg1_79	A	13	0.1625	0.00137109	0.0370283
GCR_cBin8657_Ctg1_79	C	67	0.8375	0.00137109	0.0370283
ESTV_20115_337	A	36	0.45	0.0030625	0.0553399
ESTV_20115_337	G	44	0.55	0.0030625	0.0553399
GCR_cBin15162_Ctg1_205	A	42	0.525	0.00217188	0.0466034
GCR_cBin15162_Ctg1_205	C	38	0.475	0.00217188	0.0466034
GCR_cBin21922_Ctg1_271	A	50	0.625	0.00273437	0.0522913
GCR_cBin21922_Ctg1_271	G	30	0.375	0.00273437	0.0522913
GCR_cBin21922_Ctg1_272	A	30	0.375	0.00273437	0.0522913
GCR_cBin21922_Ctg1_272	C	50	0.625	0.00273437	0.0522913
ESTNV_28147_868	A	29	0.3625	0.00312109	0.0558667
ESTNV_28147_868	T	51	0.6375	0.00312109	0.0558667
GCR_cBin17189_Ctg1_418	A	42	0.525	0.00279687	0.0528855
GCR_cBin17189_Ctg1_418	G	38	0.475	0.00279687	0.0528855
GCR_cBin34_Ctg1_596	A	78	0.975	0.000296875	0.0172301
GCR_cBin34_Ctg1_596	C	2	0.025	0.000296875	0.0172301
GCR_cBin2124_Ctg1_298	A	74	0.925	0.000796875	0.028229
GCR_cBin2124_Ctg1_298	G	6	0.075	0.000796875	0.028229
ESTNV_36830_1365	A	8	0.1	0.001	0.0316228
ESTNV_36830_1365	G	72	0.9	0.001	0.0316228
ESTV_16585_88	A	76	0.95	0.0005625	0.0237171
ESTV_16585_88	G	4	0.05	0.0005625	0.0237171
GCR_cBin33029_Ctg1_110	A	7	0.0875	0.000902344	0.030039
GCR_cBin33029_Ctg1_110	G	73	0.9125	0.000902344	0.030039
ESTNV_35593_589	A	80	1	0	0
GCR_cBin29162_Ctg1_328	A	49	0.6125	0.00296484	0.0544504
GCR_cBin29162_Ctg1_328	G	31	0.3875	0.00296484	0.0544504
GCR_cBin29853_Ctg1_324	A	3	0.0375	0.000433594	0.0208229
GCR_cBin29853_Ctg1_324	T	77	0.9625	0.000433594	0.0208229
GCR_cBin4502_Ctg2_241	C	70	0.875	0.00117187	0.0342327
GCR_cBin4502_Ctg2_241	G	10	0.125	0.00117187	0.0342327
ESTNV_35593_1402	A	29	0.3625	0.00312109	0.0558667
ESTNV_35593_1402	G	51	0.6375	0.00312109	0.0558667
GCR_cBin7483_Ctg1_160	A	54	0.675	0.00298438	0.0546294
GCR_cBin7483_Ctg1_160	G	26	0.325	0.00298438	0.0546294
GCR_hBin16230_Ctg1_42	A	29	0.3625	0.00312109	0.0558667
GCR_hBin16230_Ctg1_42	G	51	0.6375	0.00312109	0.0558667
ESTNV_35108_1142	A	78	0.975	0.000296875	0.0172301
ESTNV_35108_1142	G	2	0.025	0.000296875	0.0172301
ESTNV_32740_1792	A	46	0.575	0.00267188	0.0516902
ESTNV_32740_1792	T	34	0.425	0.00267188	0.0516902
ESTNV_18010_624	A	80	1	0	0
ESTNV_33627_835	A	44	0.55	0.0030625	0.0553399
ESTNV_33627_835	G	36	0.45	0.0030625	0.0553399
ESTNV_33761_306	A	80	1	0	0
ESTNV_35278_946	C	80	1	0	0
ESTNV_32069_319	A	79	0.9875	0.000152344	0.0123428
ESTNV_32069_319	C	1	0.0125	0.000152344	0.0123428
GCR_cBin31757_Ctg1_238	A	42	0.525	0.00248438	0.0498435
GCR_cBin31757_Ctg1_238	C	38	0.475	0.00248438	0.0498435
ESTNV_34322_888	A	60	0.75	0.0025	0.05
ESTNV_34322_888	T	20	0.25	0.0025	0.05
ESTNV_13218_450	A	15	0.1875	0.00177734	0.0421586
ESTNV_13218_450	G	65	0.8125	0.00177734	0.0421586
ESTV_19854_114	A	47	0.5875	0.00277734	0.0527005
ESTV_19854_114	C	33	0.4125	0.00277734	0.0527005
GCR_cBin40971_Ctg1_99	A	59	0.7375	0.00280859	0.0529962
GCR_cBin40971_Ctg1_99	C	21	0.2625	0.00280859	0.0529962
ESTNV_35964_989	C	80	1	0	0
GCR_cBin18615_Ctg1_159	A	70	0.875	0.00179688	0.0423896
GCR_cBin18615_Ctg1_159	C	10	0.125	0.00179688	0.0423896
ESTNV_33535_713	A	5	0.0625	0.000996094	0.031561
ESTNV_33535_713	C	75	0.9375	0.000996094	0.031561
GCR_cBin48650_Ctg1_186	A	62	0.775	0.00185937	0.0431205
GCR_cBin48650_Ctg1_186	G	18	0.225	0.00185937	0.0431205
ESTNV_36924_232	A	54	0.675	0.00204688	0.0452424
ESTNV_36924_232	C	26	0.325	0.00204688	0.0452424
ESTNV_36384_1752	A	75	0.9375	0.000683594	0.0261456
ESTNV_36384_1752	G	5	0.0625	0.000683594	0.0261456
ESTNV_35253_493	G	80	1	0	0
ESTNV_33535_853	A	5	0.0625	0.000996094	0.031561
ESTNV_33535_853	G	75	0.9375	0.000996094	0.031561
GCR_cBin45827_Ctg1_60	A	3	0.0375	0.000433594	0.0208229
GCR_cBin45827_Ctg1_60	C	77	0.9625	0.000433594	0.0208229
ESTV_15080_392	A	37	0.4625	0.00355859	0.0596539
ESTV_15080_392	G	43	0.5375	0.00355859	0.0596539
GCR_cBin44622_Ctg1_29	A	63	0.7875	0.00183984	0.0428934
GCR_cBin44622_Ctg1_29	G	17	0.2125	0.00183984	0.0428934
GCR_cBin46385_Ctg1_67	A	6	0.075	0.000796875	0.028229
GCR_cBin46385_Ctg1_67	G	74	0.925	0.000796875	0.028229
GCR_cBin572_Ctg1_59	A	54	0.675	0.00204688	0.0452424
GCR_cBin572_Ctg1_59	C	26	0.325	0.00204688	0.0452424
ESTNV_28108_776	A	33	0.4125	0.00308984	0.0555864
ESTNV_28108_776	C	47	0.5875	0.00308984	0.0555864
ESTNV_35762_168	A	36	0.45	0.003375	0.0580948
ESTNV_35762_168	C	44	0.55	0.003375	0.0580948
GCR_cBin46046_Ctg1_198	A	45	0.5625	0.00349609	0.0591278
GCR_cBin46046_Ctg1_198	C	35	0.4375	0.00349609	0.0591278
GCR_cBin33614_Ctg1_90	A	4	0.05	0.0005625	0.0237171
GCR_cBin33614_Ctg1_90	G	76	0.95	0.0005625	0.0237171
GCR_cBin17465_Ctg1_129	C	38	0.475	0.00248438	0.0498435
GCR_cBin17465_Ctg1_129	G	42	0.525	0.00248438	0.0498435
ESTNV_30075_59	A	29	0.3625	0.00249609	0.0499609
ESTNV_30075_59	C	51	0.6375	0.00249609	0.0499609
ESTV_21602_820	A	80	1	0	0
GCR_cBin43822_Ctg1_97	A	80	1	0	0
ESTNV_32753_1727	G	80	1	0	0
GCR_cBin45576_Ctg1_50	A	75	0.9375	0.000683594	0.0261456
GCR_cBin45576_Ctg1_50	G	5	0.0625	0.000683594	0.0261456
GCR_cBin1952_Ctg1_280	A	6	0.075	0.000796875	0.028229
GCR_cBin1952_Ctg1_280	G	74	0.925	0.000796875	0.028229
GCR_cBin38681_Ctg1_218	A	11	0.1375	0.00155859	0.039479
GCR_cBin38681_Ctg1_218	C	69	0.8625	0.00155859	0.039479
GCR_cBin6340_Ctg1_59	A	44	0.55	0.0030625	0.0553399
GCR_cBin6340_Ctg1_59	C	36	0.45	0.0030625	0.0553399
GCR_cBin11187_Ctg1_62	A	1	0.0125	0.000152344	0.0123428
GCR_cBin11187_Ctg1_62	G	79	0.9875	0.000152344	0.0123428
GCR_cBin7014_Ctg1_132	A	41	0.5125	0.00358984	0.0599153
GCR_cBin7014_Ctg1_132	G	39	0.4875	0.00358984	0.0599153
GCR_rBin10118_Ctg1_34	A	3	0.0375	0.000433594	0.0208229
GCR_rBin10118_Ctg1_34	G	77	0.9625	0.000433594	0.0208229
ESTNV_34021_1870	G	80	1	0	0
ESTNV_32103_191	C	80	1	0	0
GCR_cBin42179_Ctg1_389	C	80	1	0	0
GCR_cBin43281_Ctg1_51	G	80	1	0	0
GCR_cBin52844_Ctg1_180	A	50	0.625	0.00273437	0.0522913
GCR_cBin52844_Ctg1_180	G	30	0.375	0.00273437	0.0522913
GCR_cBin42179_Ctg1_350	G	80	1	0	0
GCR_cBin37910_Ctg1_93	A	49	0.6125	0.00296484	0.0544504
GCR_cBin37910_Ctg1_93	G	31	0.3875	0.00296484	0.0544504
GCR_cBin30294_Ctg1_36	G	80	1	0	0
ESTNV_28987_832	A	37	0.4625	0.00324609	0.0569745
ESTNV_28987_832	C	43	0.5375	0.00324609	0.0569745
GCR_cBin38428_Ctg1_72	A	67	0.8375	0.00137109	0.0370283
GCR_cBin38428_Ctg1_72	C	13	0.1625	0.00137109	0.0370283
GCR_cBin30905_Ctg1_38	A	1	0.0125	0.000152344	0.0123428
GCR_cBin30905_Ctg1_38	C	79	0.9875	0.000152344	0.0123428
ESTNV_30484_927	A	80	1	0	0
GCR_cBin28586_Ctg1_147	A	64	0.8	0.002125	0.0460977
GCR_cBin28586_Ctg1_147	G	16	0.2	0.002125	0.0460977
ESTNV_33760_518	C	72	0.9	0.001	0.0316228
ESTNV_33760_518	G	8	0.1	0.001	0.0316228
GCR_cBin17730_Ctg1_232	A	75	0.9375	0.000683594	0.0261456
GCR_cBin17730_Ctg1_232	C	5	0.0625	0.000683594	0.0261456
GCR_cBin23510_Ctg1_150	A	75	0.9375	0.000683594	0.0261456
GCR_cBin23510_Ctg1_150	G	5	0.0625	0.000683594	0.0261456
GCR_cBin43132_Ctg1_139	A	75	0.9375	0.000683594	0.0261456
GCR_cBin43132_Ctg1_139	G	5	0.0625	0.000683594	0.0261456
ESTNV_33875_378	C	4	0.05	0.0005625	0.0237171
ESTNV_33875_378	G	76	0.95	0.0005625	0.0237171
ESTNV_35486_240	A	28	0.35	0.0025625	0.0506211
ESTNV_35486_240	G	52	0.65	0.0025625	0.0506211
ESTNV_35163_1993	T	80	1	0	0
ESTNV_35486_738	A	31	0.3875	0.00233984	0.0483719
ESTNV_35486_738	C	49	0.6125	0.00233984	0.0483719
GCR_cBin12492_Ctg1_178	A	4	0.05	0.0005625	0.0237171
GCR_cBin12492_Ctg1_178	G	76	0.95	0.0005625	0.0237171
ESTNV_35486_385	C	77	0.9625	0.000433594	0.0208229
ESTNV_35486_385	G	3	0.0375	0.000433594	0.0208229
GCR_hBin7576_Ctg1_138	A	77	0.9625	0.000433594	0.0208229
GCR_hBin7576_Ctg1_138	G	3	0.0375	0.000433594	0.0208229
GCR_cBin12492_Ctg1_183	A	4	0.05	0.0005625	0.0237171
GCR_cBin12492_Ctg1_183	G	76	0.95	0.0005625	0.0237171
ESTNV_26437_1349	A	71	0.8875	0.00140234	0.0374479
ESTNV_26437_1349	G	9	0.1125	0.00140234	0.0374479
GCR_cBin10658_Ctg1_107	C	9	0.1125	0.00108984	0.0330128
GCR_cBin10658_Ctg1_107	G	71	0.8875	0.00108984	0.0330128
GCR_cBin33592_Ctg1_241	A	80	1	0	0
ESTNV_33888_314	G	80	1	0	0
GCR_cBin10390_Ctg1_228	A	70	0.875	0.00148438	0.0385276
GCR_cBin10390_Ctg1_228	C	10	0.125	0.00148438	0.0385276
ESTV_12221_170	A	10	0.125	0.00148438	0.0385276
ESTV_12221_170	G	70	0.875	0.00148438	0.0385276
GCR_cBin26140_Ctg1_118	A	4	0.05	0.0005625	0.0237171
GCR_cBin26140_Ctg1_118	G	76	0.95	0.0005625	0.0237171
GCR_cBin1019_Ctg1_221	A	64	0.8	0.0018125	0.0425735
GCR_cBin1019_Ctg1_221	G	16	0.2	0.0018125	0.0425735
GCR_cBin26140_Ctg1_33	A	76	0.95	0.0005625	0.0237171
GCR_cBin26140_Ctg1_33	T	4	0.05	0.0005625	0.0237171
ESTNV_27182_609	G	80	1	0	0
GCR_cBin27812_Ctg1_148	A	63	0.7875	0.00246484	0.0496472
GCR_cBin27812_Ctg1_148	G	17	0.2125	0.00246484	0.0496472
GCR_cBin26855_Ctg1_110	A	17	0.2125	0.00246484	0.0496472
GCR_cBin26855_Ctg1_110	C	63	0.7875	0.00246484	0.0496472
GCR_cBin39664_Ctg1_85	A	14	0.175	0.00173438	0.0416458
GCR_cBin39664_Ctg1_85	G	66	0.825	0.00173438	0.0416458
GCR_cBin38208_Ctg1_21	A	59	0.7375	0.00249609	0.0499609
GCR_cBin38208_Ctg1_21	T	21	0.2625	0.00249609	0.0499609
ESTV_15118_153	A	13	0.1625	0.00137109	0.0370283
ESTV_15118_153	G	67	0.8375	0.00137109	0.0370283
GCR_cBin47268_Ctg1_70	G	80	1	0	0
GCR_cBin47268_Ctg1_73	A	72	0.9	0.001	0.0316228
GCR_cBin47268_Ctg1_73	G	8	0.1	0.001	0.0316228
ESTNV_34296_693	A	78	0.975	0.000296875	0.0172301
ESTNV_34296_693	T	2	0.025	0.000296875	0.0172301
GCR_cBin18023_Ctg1_41	C	42	0.525	0.00404688	0.0636151
GCR_cBin18023_Ctg1_41	G	38	0.475	0.00404688	0.0636151
ESTNV_36480_1354	A	53	0.6625	0.00324609	0.0569745
ESTNV_36480_1354	T	27	0.3375	0.00324609	0.0569745
GCR_cBin34894_Ctg1_621	G	80	1	0	0
GCR_cBin26436_Ctg1_42	A	68	0.85	0.001625	0.0403113
GCR_cBin26436_Ctg1_42	G	12	0.15	0.001625	0.0403113
GCR_cBin24398_Ctg1_117	A	15	0.1875	0.00146484	0.0382733
GCR_cBin24398_Ctg1_117	G	65	0.8125	0.00146484	0.0382733
GCR_cBin3706_Ctg1_364	A	15	0.1875	0.00146484	0.0382733
GCR_cBin3706_Ctg1_364	G	65	0.8125	0.00146484	0.0382733
GCR_cBin23307_Ctg1_194	C	80	1	0	0
GCR_cBin12132_Ctg1_186	A	16	0.205128	0.0022084	0.0469936
GCR_cBin12132_Ctg1_186	G	62	0.794872	0.0022084	0.0469936
GCR_cBin5178_Ctg1_86	A	17	0.2125	0.00215234	0.0463934
GCR_cBin5178_Ctg1_86	G	63	0.7875	0.00215234	0.0463934
GCR_cBin12749_Ctg1_233	A	55	0.6875	0.00240234	0.0490137
GCR_cBin12749_Ctg1_233	G	25	0.3125	0.00240234	0.0490137
GCR_cBin45817_Ctg1_71	A	9	0.1125	0.00108984	0.0330128
GCR_cBin45817_Ctg1_71	G	71	0.8875	0.00108984	0.0330128
ESTNV_26350_156	C	80	1	0	0
ESTNV_21694_208	A	8	0.1	0.001	0.0316228
ESTNV_21694_208	G	72	0.9	0.001	0.0316228
ESTNV_29851_266	A	26	0.325	0.00267188	0.0516902
ESTNV_29851_266	G	54	0.675	0.00267188	0.0516902
GCR_cBin19407_Ctg1_54	A	59	0.7375	0.00312109	0.0558667
GCR_cBin19407_Ctg1_54	G	21	0.2625	0.00312109	0.0558667
GCR_cBin12450_Ctg1_432	A	7	0.0875	0.000902344	0.030039
GCR_cBin12450_Ctg1_432	C	73	0.9125	0.000902344	0.030039
ESTV_14230_80	A	46	0.575	0.00235937	0.0485734
ESTV_14230_80	C	34	0.425	0.00235937	0.0485734
GCR_cBin5917_Ctg1_208	A	74	0.925	0.000796875	0.028229
GCR_cBin5917_Ctg1_208	G	6	0.075	0.000796875	0.028229
GCR_cBin1185_Ctg1_145	A	21	0.2625	0.00249609	0.0499609
GCR_cBin1185_Ctg1_145	G	59	0.7375	0.00249609	0.0499609
GCR_hBin21729_Ctg1_51	A	80	1	0	0
GCR_cBin37146_Ctg1_312	C	8	0.1	0.0013125	0.0362284
GCR_cBin37146_Ctg1_312	G	72	0.9	0.0013125	0.0362284
GCR_cBin5718_Ctg1_42	A	56	0.7	0.002125	0.0460977
GCR_cBin5718_Ctg1_42	G	24	0.3	0.002125	0.0460977
GCR_cBin32973_Ctg1_81	A	80	1	0	0
GCR_cBin32973_Ctg1_29	A	60	0.75	0.0021875	0.0467707
GCR_cBin32973_Ctg1_29	G	20	0.25	0.0021875	0.0467707
ESTNV_22623_238	G	80	1	0	0
GCR_cBin35013_Ctg1_144	A	16	0.2	0.0018125	0.0425735
GCR_cBin35013_Ctg1_144	G	64	0.8	0.0018125	0.0425735
ESTNV_33390_1703	A	37	0.4625	0.00199609	0.0446777
ESTNV_33390_1703	G	43	0.5375	0.00199609	0.0446777
GCR_cBin28945_Ctg1_147	A	44	0.55	0.0036875	0.0607248
GCR_cBin28945_Ctg1_147	G	36	0.45	0.0036875	0.0607248
ESTNV_35898_1062	A	19	0.2375	0.00155859	0.039479
ESTNV_35898_1062	G	61	0.7625	0.00155859	0.039479
GCR_cBin26038_Ctg1_203	A	29	0.3625	0.00218359	0.0467289
GCR_cBin26038_Ctg1_203	G	51	0.6375	0.00218359	0.0467289
GCR_cBin5440_Ctg1_39	A	76	0.95	0.0005625	0.0237171
GCR_cBin5440_Ctg1_39	T	4	0.05	0.0005625	0.0237171
GCR_cBin32127_Ctg1_234	A	8	0.1	0.001	0.0316228
GCR_cBin32127_Ctg1_234	G	72	0.9	0.001	0.0316228
GCR_hBin19696_Ctg1_47	G	80	1	0	0
GCR_cBin32127_Ctg1_245	A	72	0.9	0.001	0.0316228
GCR_cBin32127_Ctg1_245	C	8	0.1	0.001	0.0316228
ESTNV_27431_454	A	49	0.6125	0.00327734	0.0572481
ESTNV_27431_454	G	31	0.3875	0.00327734	0.0572481
BASS14_B7_A02_640	A	66	1	0	0
GCR_cBin41946_Ctg1_167	A	67	0.8375	0.00230859	0.0480478
GCR_cBin41946_Ctg1_167	G	13	0.1625	0.00230859	0.0480478
GCR_cBin41946_Ctg1_89	C	67	0.8375	0.00230859	0.0480478
GCR_cBin41946_Ctg1_89	G	13	0.1625	0.00230859	0.0480478
ESTNV_16068_255	C	37	0.4625	0.00293359	0.0541627
ESTNV_16068_255	G	43	0.5375	0.00293359	0.0541627
GCR_cBin49053_Ctg1_111	A	17	0.2125	0.00183984	0.0428934
GCR_cBin49053_Ctg1_111	G	63	0.7875	0.00183984	0.0428934
ESTNV_35810_833	A	62	0.775	0.00217188	0.0466034
ESTNV_35810_833	C	18	0.225	0.00217188	0.0466034
GCR_hBin18139_Ctg1_60	A	46	0.575	0.00329687	0.0574184
GCR_hBin18139_Ctg1_60	C	34	0.425	0.00329687	0.0574184
GCR_hBin18139_Ctg1_230	A	46	0.575	0.00329687	0.0574184
GCR_hBin18139_Ctg1_230	G	34	0.425	0.00329687	0.0574184
ESTNV_35810_643	A	3	0.0375	0.000433594	0.0208229
ESTNV_35810_643	C	77	0.9625	0.000433594	0.0208229
ESTNV_17527_71	C	3	0.0375	0.000433594	0.0208229
ESTNV_17527_71	G	77	0.9625	0.000433594	0.0208229
ESTNV_28091_630	A	69	0.8625	0.00218359	0.0467289
ESTNV_28091_630	G	11	0.1375	0.00218359	0.0467289
ESTNV_25175_634	A	32	0.4	0.00225	0.0474342
ESTNV_25175_634	T	48	0.6	0.00225	0.0474342
GCR_cBin25193_Ctg1_80	A	10	0.125	0.00148438	0.0385276
GCR_cBin25193_Ctg1_80	G	70	0.875	0.00148438	0.0385276
ESTNV_27318_155	A	79	0.9875	0.000152344	0.0123428
ESTNV_27318_155	G	1	0.0125	0.000152344	0.0123428
GCR_cBin1418_Ctg1_135	A	24	0.3	0.0030625	0.0553399
GCR_cBin1418_Ctg1_135	C	56	0.7	0.0030625	0.0553399
ESTNV_31116_191	A	65	0.8125	0.00177734	0.0421586
[truncated: 8,393 more rows]

## Sheet: BA_Vin
File S1. SNP allele frequencies per population. LL_SYS
[truncated: 8,765 more rows]

[truncated: 6 more sheets: B_Tul, B_Leb, BW_Yap, W_Emt, W_Sum, W_Pon]
